# Supplementary material
Source: PubMed Central journal article supplement (PMC7301371)

## SUPPORTING INFORMATION

### **Dolichocarpols A-F, Unprecedented Macrocyclic Humulene-Type Sesquiterpenoids from *Anaxagorea dolichocarpa***

Kaio Aragão Sales,<sup>†</sup> Anderson Angel Vieira Pinheiro,<sup>†</sup> Diego Igor Alves Fernandes de Araújo,<sup>†</sup>  
Lucas Silva Abreu,<sup>†</sup> Rodrigo Silva de Andrade,<sup>†</sup> Maria de Fátima Agra,<sup>‡</sup> Marianna Vieira Sobral,<sup>†</sup>  
Rafael Carlos Ferreira,<sup>†</sup> Raimundo Braz-Filho,<sup>§</sup> Marcus Tullius Scotti,<sup>†</sup> Josean Fechine Tavares,<sup>†\*</sup>  
and Marcelo Sobral da Silva.<sup>†</sup>

<sup>†</sup>Postgraduate Program in Natural and Synthetic Bioactive Products, Federal University of Paraíba,  
João Pessoa, Brazil

<sup>‡</sup>Biotechnology Department, Federal University of Paraíba, João Pessoa, Brazil

<sup>§</sup>Department of Chemistry, Institute of Chemistry, Federal Rural University of Rio de Janeiro,  
Seropédica, Brazil

## Contents Table

|                                                                                                                                 |     |
|---------------------------------------------------------------------------------------------------------------------------------|-----|
| <b>Figure S1.</b> IR spectrum of compound <b>1</b> .....                                                                        | S7  |
| <b>Figure S2.</b> HRESIMS spectrum of compound <b>1</b> ([M + Na], positive ion mode) .....                                     | S7  |
| <b>Figure S3.</b> <sup>1</sup> H NMR (400 MHz, CDCl <sub>3</sub> ) spectrum of <b>1</b> .....                                   | S8  |
| <b>Figure S4.</b> <sup>1</sup> H NMR (400 MHz, CDCl <sub>3</sub> ) extension spectrum of <b>1</b> .....                         | S9  |
| <b>Figure S5.</b> <sup>13</sup> C NMR (100 MHz, CDCl <sub>3</sub> ) spectrum of <b>1</b> .....                                  | S10 |
| <b>Figure S6.</b> <sup>13</sup> C DEPT-135 NMR (100 MHz, CDCl <sub>3</sub> ) spectrum of <b>1</b> .....                         | S11 |
| <b>Figure S7.</b> HSQC NMR (400 MHz, CDCl <sub>3</sub> ) spectrum of <b>1</b> .....                                             | S12 |
| <b>Figure S8.</b> HSQC NMR (400 MHz, CDCl <sub>3</sub> ) extension spectrum of <b>1</b> .....                                   | S13 |
| <b>Figure S9.</b> HMBC NMR (400 MHz, CDCl <sub>3</sub> ) spectrum of <b>1</b> .....                                             | S14 |
| <b>Figure S10.</b> HMBC NMR (400 MHz, CDCl <sub>3</sub> ) extension spectrum of <b>1</b> .....                                  | S15 |
| <b>Figure S11.</b> HMBC NMR (400 MHz, CDCl <sub>3</sub> ) extension spectrum of <b>1</b> .....                                  | S16 |
| <b>Figure S12.</b> <sup>1</sup> H- <sup>1</sup> H COSY NMR (400 MHz, CDCl <sub>3</sub> ) spectrum of <b>1</b> .....             | S17 |
| <b>Figure S13.</b> <sup>1</sup> H- <sup>1</sup> H NOESY NMR (400 MHz, CDCl <sub>3</sub> ) spectrum of <b>1</b> .....            | S18 |
| <b>Figure S14.</b> <sup>1</sup> H- <sup>1</sup> H NOESY NMR (400 MHz, CDCl <sub>3</sub> ) extension spectrum of <b>1</b> .....  | S19 |
| <b>Figure S15.</b> ESIMS/MS spectrum of compound <b>1</b> ([M + Na], positive ion mode) .....                                   | S20 |
| <b>Figure S16.</b> Experimental and calculated ECD spectra and absorption spectra of compounds <b>1–3</b><br>and <b>6</b> ..... | S21 |
| <b>Figure S17.</b> IR spectrum of compound <b>2</b> .....                                                                       | S22 |
| <b>Figure S18.</b> HRESIMS spectrum of compound <b>2</b> ([M + Na], positive ion mode) .....                                    | S22 |
| <b>Figure S19.</b> <sup>1</sup> H NMR (500 MHz, CDCl <sub>3</sub> ) spectrum of <b>2</b> .....                                  | S23 |
| <b>Figure S20.</b> <sup>1</sup> H NMR (500 MHz, CDCl <sub>3</sub> ) extension spectrum of <b>2</b> .....                        | S24 |
| <b>Figure S21.</b> <sup>13</sup> C NMR (125 MHz, CDCl <sub>3</sub> ) spectrum of <b>2</b> .....                                 | S25 |

|                                                                                                                           |     |
|---------------------------------------------------------------------------------------------------------------------------|-----|
| <b>Figure S22.</b> $^{13}\text{C}$ NMR (200 MHz, $\text{CDCl}_3$ ) spectrum of <b>2</b> .....                             | S26 |
| <b>Figure S23.</b> HSQC NMR (500 MHz, $\text{CDCl}_3$ ) extension spectrum of <b>2</b> .....                              | S27 |
| <b>Figure S24.</b> HMBC NMR (500 MHz, $\text{CDCl}_3$ ) spectrum of <b>2</b> .....                                        | S28 |
| <b>Figure S25.</b> HMBC NMR (500 MHz, $\text{CDCl}_3$ ) extension spectrum of <b>2</b> .....                              | S29 |
| <b>Figure S26.</b> $^1\text{H}$ - $^1\text{H}$ COSY NMR (500 MHz, $\text{CDCl}_3$ ) spectrum of <b>2</b> .....            | S30 |
| <b>Figure S27.</b> $^1\text{H}$ - $^1\text{H}$ NOESY NMR (500 MHz, $\text{CDCl}_3$ ) spectrum of <b>2</b> .....           | S31 |
| <b>Figure S28.</b> $^1\text{H}$ - $^1\text{H}$ NOESY NMR (500 MHz, $\text{CDCl}_3$ ) extension spectrum of <b>2</b> ..... | S32 |
| <b>Figure S29.</b> ESIMS/MS spectrum of compound <b>2</b> ( $[\text{M} + \text{H}]$ , positive ion mode).....             | S33 |
| <b>Figure S30.</b> IR spectrum of compound <b>3</b> .....                                                                 | S34 |
| <b>Figure S31.</b> HRESIMS spectrum of compound <b>3</b> ( $[\text{M} + \text{Na}]$ , positive ion mode) .....            | S34 |
| <b>Figure S32.</b> $^1\text{H}$ NMR (400 MHz, $\text{CDCl}_3$ ) spectrum of <b>3</b> .....                                | S35 |
| <b>Figure S33.</b> $^1\text{H}$ NMR (400 MHz, $\text{CDCl}_3$ ) extension spectrum of <b>3</b> .....                      | S36 |
| <b>Figure S34.</b> $^{13}\text{C}$ NMR (100 MHz, $\text{CDCl}_3$ ) spectrum of <b>3</b> .....                             | S37 |
| <b>Figure S35.</b> $^{13}\text{C}$ DEPT-135 NMR (100 MHz, $\text{CDCl}_3$ ) spectrum of <b>3</b> .....                    | S38 |
| <b>Figure S36.</b> HSQC NMR (400 MHz, $\text{CDCl}_3$ ) spectrum of <b>3</b> .....                                        | S39 |
| <b>Figure S37.</b> HSQC NMR (400 MHz, $\text{CDCl}_3$ ) extension spectrum of <b>3</b> .....                              | S40 |
| <b>Figure S38.</b> HMBC NMR (400 MHz, $\text{CDCl}_3$ ) spectrum of <b>3</b> .....                                        | S41 |
| <b>Figure S39.</b> HMBC NMR (400 MHz, $\text{CDCl}_3$ ) extension spectrum of <b>3</b> .....                              | S42 |
| <b>Figure S40.</b> HMBC NMR (400 MHz, $\text{CDCl}_3$ ) extension spectrum of <b>3</b> .....                              | S43 |
| <b>Figure S41.</b> $^1\text{H}$ - $^1\text{H}$ COSY NMR (400 MHz, $\text{CDCl}_3$ ) spectrum of <b>3</b> .....            | S44 |
| <b>Figure S42.</b> $^1\text{H}$ - $^1\text{H}$ NOESY NMR (400 MHz, $\text{CDCl}_3$ ) spectrum of <b>3</b> .....           | S45 |
| <b>Figure S43.</b> $^1\text{H}$ - $^1\text{H}$ NOESY NMR (400 MHz, $\text{CDCl}_3$ ) extension spectrum of <b>3</b> ..... | S46 |
| <b>Figure S44.</b> $^1\text{H}$ NMR (400 MHz, $\text{CDCl}_3$ ) spectrum of acetylated <b>3</b> .....                     | S47 |

|                                                                                                                                              |     |
|----------------------------------------------------------------------------------------------------------------------------------------------|-----|
| <b>Figure S45.</b> <sup>1</sup> H NMR (400 MHz, CDCl <sub>3</sub> ) extension spectrum of acetylated <b>3</b> .....                          | S48 |
| <b>Figure S46.</b> <sup>13</sup> C NMR (100 MHz, CDCl <sub>3</sub> ) spectrum of acetylated <b>3</b> .....                                   | S49 |
| <b>Figure S47.</b> HSQC NMR (400 MHz, CDCl <sub>3</sub> ) spectrum of acetylated <b>3</b> .....                                              | S50 |
| <b>Figure S48.</b> HSQC NMR (400 MHz, CDCl <sub>3</sub> ) extension spectrum of acetylated <b>3</b> .....                                    | S51 |
| <b>Figure S49.</b> HMBC NMR (400 MHz, CDCl <sub>3</sub> ) spectrum of acetylated <b>3</b> .....                                              | S52 |
| <b>Figure S50.</b> HMBC NMR (400 MHz, CDCl <sub>3</sub> ) extension spectrum of acetylated <b>3</b> .....                                    | S53 |
| <b>Figure S51.</b> <sup>1</sup> H- <sup>1</sup> H COSY NMR (400 MHz, CDCl <sub>3</sub> ) spectrum of acetylated <b>3</b> .....               | S54 |
| <b>Figure S52.</b> <sup>1</sup> H- <sup>1</sup> H NOESY NMR (400 MHz, CDCl <sub>3</sub> ) spectrum of acetylated <b>3</b> .....              | S55 |
| <b>Figure S53.</b> <sup>1</sup> H NMR (400 MHz, C <sub>5</sub> D <sub>5</sub> N) spectrum of <b>3</b> .....                                  | S56 |
| <b>Figure S54.</b> <sup>1</sup> H NMR (400 MHz, C <sub>5</sub> D <sub>5</sub> N) extension spectrum of <b>3</b> .....                        | S57 |
| <b>Figure S55.</b> <sup>1</sup> H- <sup>1</sup> H NOESY NMR (400 MHz, C <sub>5</sub> D <sub>5</sub> N) spectrum of acetylated <b>3</b> ..... | S58 |
| <b>Figure S56.</b> <sup>1</sup> H- <sup>1</sup> H NOESY NMR (400 MHz, C <sub>5</sub> D <sub>5</sub> N) extension spectrum of <b>3</b> .....  | S59 |
| <b>Figure S57.</b> ESIMS/MS spectrum of compound <b>3</b> ([M+H], positive ion mode).....                                                    | S60 |
| <b>Figure S58.</b> IR spectrum of compound <b>4</b> .....                                                                                    | S61 |
| <b>Figure S59.</b> HRESIMS spectrum of compound <b>4</b> ([M + Na], positive ion mode) .....                                                 | S61 |
| <b>Figure S60.</b> <sup>1</sup> H NMR (400 MHz, CDCl <sub>3</sub> ) spectrum of <b>4</b> .....                                               | S62 |
| <b>Figure S61.</b> <sup>1</sup> H NMR (400 MHz, CDCl <sub>3</sub> ) extension spectrum of <b>4</b> .....                                     | S63 |
| <b>Figure S62.</b> <sup>13</sup> C NMR (100 MHz, CDCl <sub>3</sub> ) spectrum of <b>4</b> .....                                              | S64 |
| <b>Figure S63.</b> <sup>13</sup> C DEPT-135 NMR (100 MHz, CDCl <sub>3</sub> ) spectrum of <b>4</b> .....                                     | S65 |
| <b>Figure S64.</b> HSQC NMR (400 MHz, CDCl <sub>3</sub> ) spectrum of <b>4</b> .....                                                         | S66 |
| <b>Figure S65.</b> HSQC NMR (400 MHz, CDCl <sub>3</sub> ) extension spectrum of <b>4</b> .....                                               | S67 |
| <b>Figure S66.</b> HMBC NMR (400 MHz, CDCl <sub>3</sub> ) spectrum of <b>4</b> .....                                                         | S68 |
| <b>Figure S67.</b> HMBC NMR (400 MHz, CDCl <sub>3</sub> ) extension spectrum of <b>4</b> .....                                               | S69 |

|                                                                                                                           |     |
|---------------------------------------------------------------------------------------------------------------------------|-----|
| <b>Figure S68.</b> $^1\text{H}$ - $^1\text{H}$ COSY NMR (400 MHz, $\text{CDCl}_3$ ) spectrum of <b>4</b> .....            | S70 |
| <b>Figure S69.</b> $^1\text{H}$ - $^1\text{H}$ NOESY NMR (400 MHz, $\text{CDCl}_3$ ) spectrum of <b>4</b> .....           | S71 |
| <b>Figure S70.</b> $^1\text{H}$ - $^1\text{H}$ NOESY NMR (400 MHz, $\text{CDCl}_3$ ) extension spectrum of <b>4</b> ..... | S72 |
| <b>Figure S71.</b> ESIMS/MS spectrum of compound <b>4</b> ( $[\text{M} + \text{H}]$ , positive ion mode).....             | S73 |
| <b>Figure S72.</b> IR spectrum of compound <b>5</b> .....                                                                 | S74 |
| <b>Figure S73.</b> HRESIMS spectrum of compound <b>5</b> ( $[\text{M} + \text{Na}]$ , positive ion mode).....             | S74 |
| <b>Figure S74.</b> $^1\text{H}$ NMR (400 MHz, $\text{CDCl}_3$ ) spectrum of <b>5</b> .....                                | S75 |
| <b>Figure S75.</b> $^1\text{H}$ NMR (400 MHz, $\text{CDCl}_3$ ) extension spectrum of <b>5</b> .....                      | S76 |
| <b>Figure S76.</b> $^{13}\text{C}$ NMR (100 MHz, $\text{CDCl}_3$ ) spectrum of <b>5</b> .....                             | S77 |
| <b>Figure S77.</b> $^{13}\text{C}$ DEPT-135 NMR (100 MHz, $\text{CDCl}_3$ ) spectrum of <b>5</b> .....                    | S78 |
| <b>Figure S78.</b> HSQC NMR (400 MHz, $\text{CDCl}_3$ ) spectrum of <b>5</b> .....                                        | S79 |
| <b>Figure S79.</b> HSQC NMR (400 MHz, $\text{CDCl}_3$ ) extension spectrum of <b>5</b> .....                              | S80 |
| <b>Figure S80.</b> HMBC NMR (400 MHz, $\text{CDCl}_3$ ) spectrum of <b>5</b> .....                                        | S81 |
| <b>Figure S81.</b> HMBC NMR (400 MHz, $\text{CDCl}_3$ ) extension spectrum of <b>5</b> .....                              | S82 |
| <b>Figure S82.</b> $^1\text{H}$ - $^1\text{H}$ COSY NMR (400 MHz, $\text{CDCl}_3$ ) spectrum of <b>5</b> .....            | S83 |
| <b>Figure S83.</b> $^1\text{H}$ - $^1\text{H}$ NOESY NMR (400 MHz, $\text{CDCl}_3$ ) spectrum of <b>5</b> .....           | S84 |
| <b>Figure S84.</b> $^1\text{H}$ - $^1\text{H}$ NOESY NMR (400 MHz, $\text{CDCl}_3$ ) extension spectrum of <b>5</b> ..... | S85 |
| <b>Figure S85.</b> IR spectrum of compound <b>6</b> .....                                                                 | S86 |
| <b>Figure S86.</b> HRESIMS spectrum of compound <b>6</b> ( $[\text{M} + \text{Na}]$ , positive ion mode).....             | S86 |
| <b>Figure S87.</b> $^1\text{H}$ NMR (400 MHz, $\text{CDCl}_3$ ) spectrum of <b>6</b> .....                                | S87 |
| <b>Figure S88.</b> $^1\text{H}$ NMR (400 MHz, $\text{CDCl}_3$ ) extension spectrum of <b>6</b> .....                      | S88 |
| <b>Figure S89.</b> $^{13}\text{C}$ NMR (400 MHz, $\text{CDCl}_3$ ) spectrum of <b>6</b> .....                             | S89 |
| <b>Figure S90.</b> DEPT-135 NMR (400 MHz, $\text{CDCl}_3$ ) spectrum of <b>6</b> .....                                    | S90 |

|                                                                                                                                |     |
|--------------------------------------------------------------------------------------------------------------------------------|-----|
| <b>Figure S91.</b> HSQC NMR (400 MHz, CDCl <sub>3</sub> ) spectrum of <b>6</b> .....                                           | S91 |
| <b>Figure S92.</b> HSQC NMR (400 MHz, CDCl <sub>3</sub> ) extension spectrum of <b>6</b> .....                                 | S92 |
| <b>Figure S93.</b> HMBC NMR (400 MHz, CDCl <sub>3</sub> ) spectrum of <b>6</b> .....                                           | S93 |
| <b>Figure S94.</b> HMBC NMR (400 MHz, CDCl <sub>3</sub> ) extension spectrum of <b>6</b> .....                                 | S94 |
| <b>Figure S95.</b> <sup>1</sup> H- <sup>1</sup> H COSY NMR (400 MHz, CDCl <sub>3</sub> ) spectrum of <b>6</b> .....            | S95 |
| <b>Figure S96.</b> <sup>1</sup> H- <sup>1</sup> H COSY NMR (400 MHz, CDCl <sub>3</sub> ) extension spectrum of <b>6</b> .....  | S96 |
| <b>Figure S97.</b> <sup>1</sup> H- <sup>1</sup> H NOESY NMR (400 MHz, CDCl <sub>3</sub> ) spectrum of <b>6</b> .....           | S97 |
| <b>Figure S98.</b> <sup>1</sup> H- <sup>1</sup> H NOESY NMR (400 MHz, CDCl <sub>3</sub> ) extension spectrum of <b>6</b> ..... | S98 |
| <b>Figure S99.</b> ESIMS/MS spectrum of compound <b>6</b> ([M + H], positive ion mode).....                                    | S99 |

**Figure S1.** IR spectrum of compound **1**

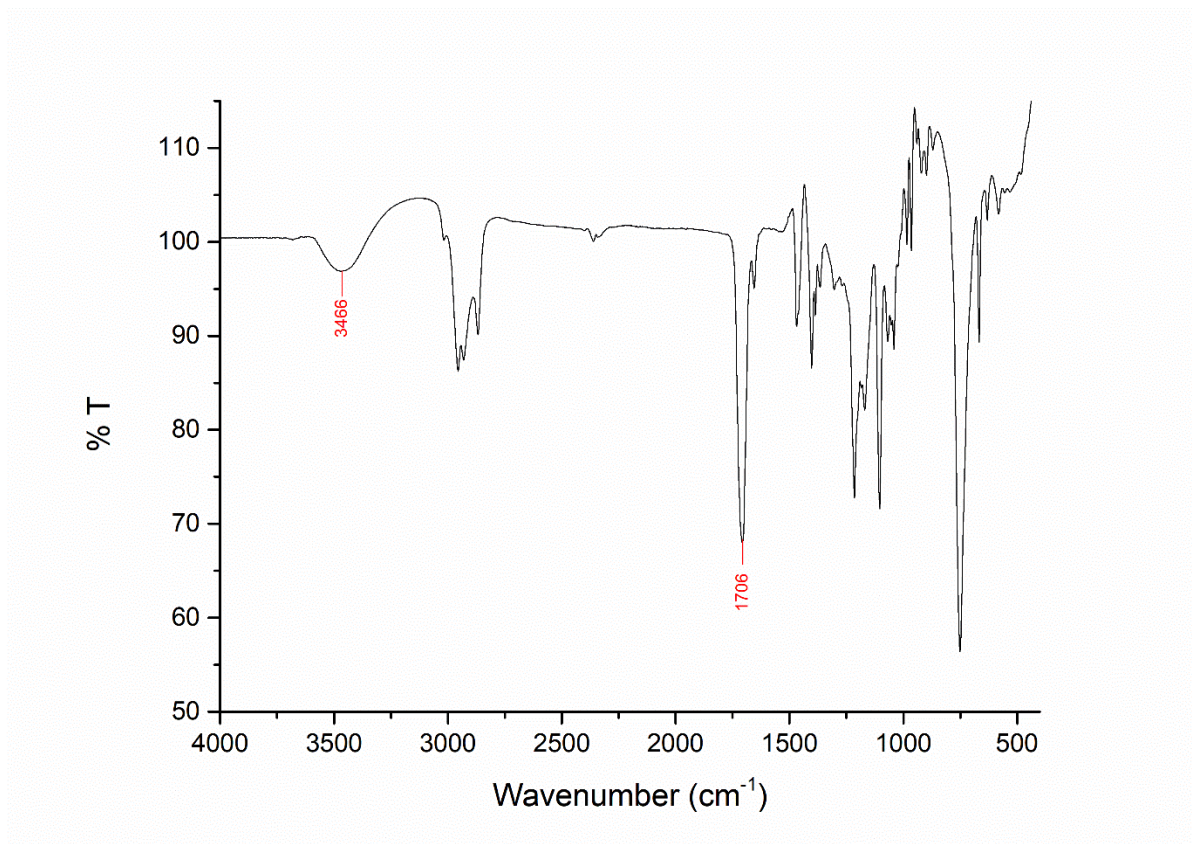

**Figure S2.** HRESIMS spectrum of compound **1** ([M + Na], positive ion mode)

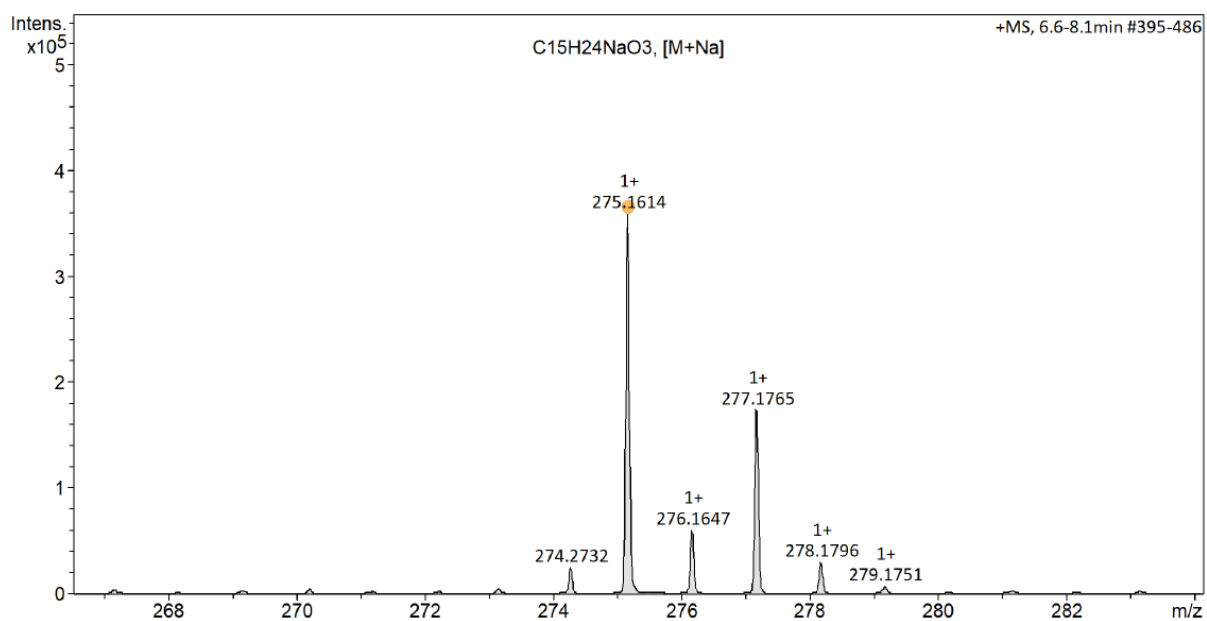

Figure S3. <sup>1</sup>H NMR (400 MHz, CDCl<sub>3</sub>) spectrum of **1**

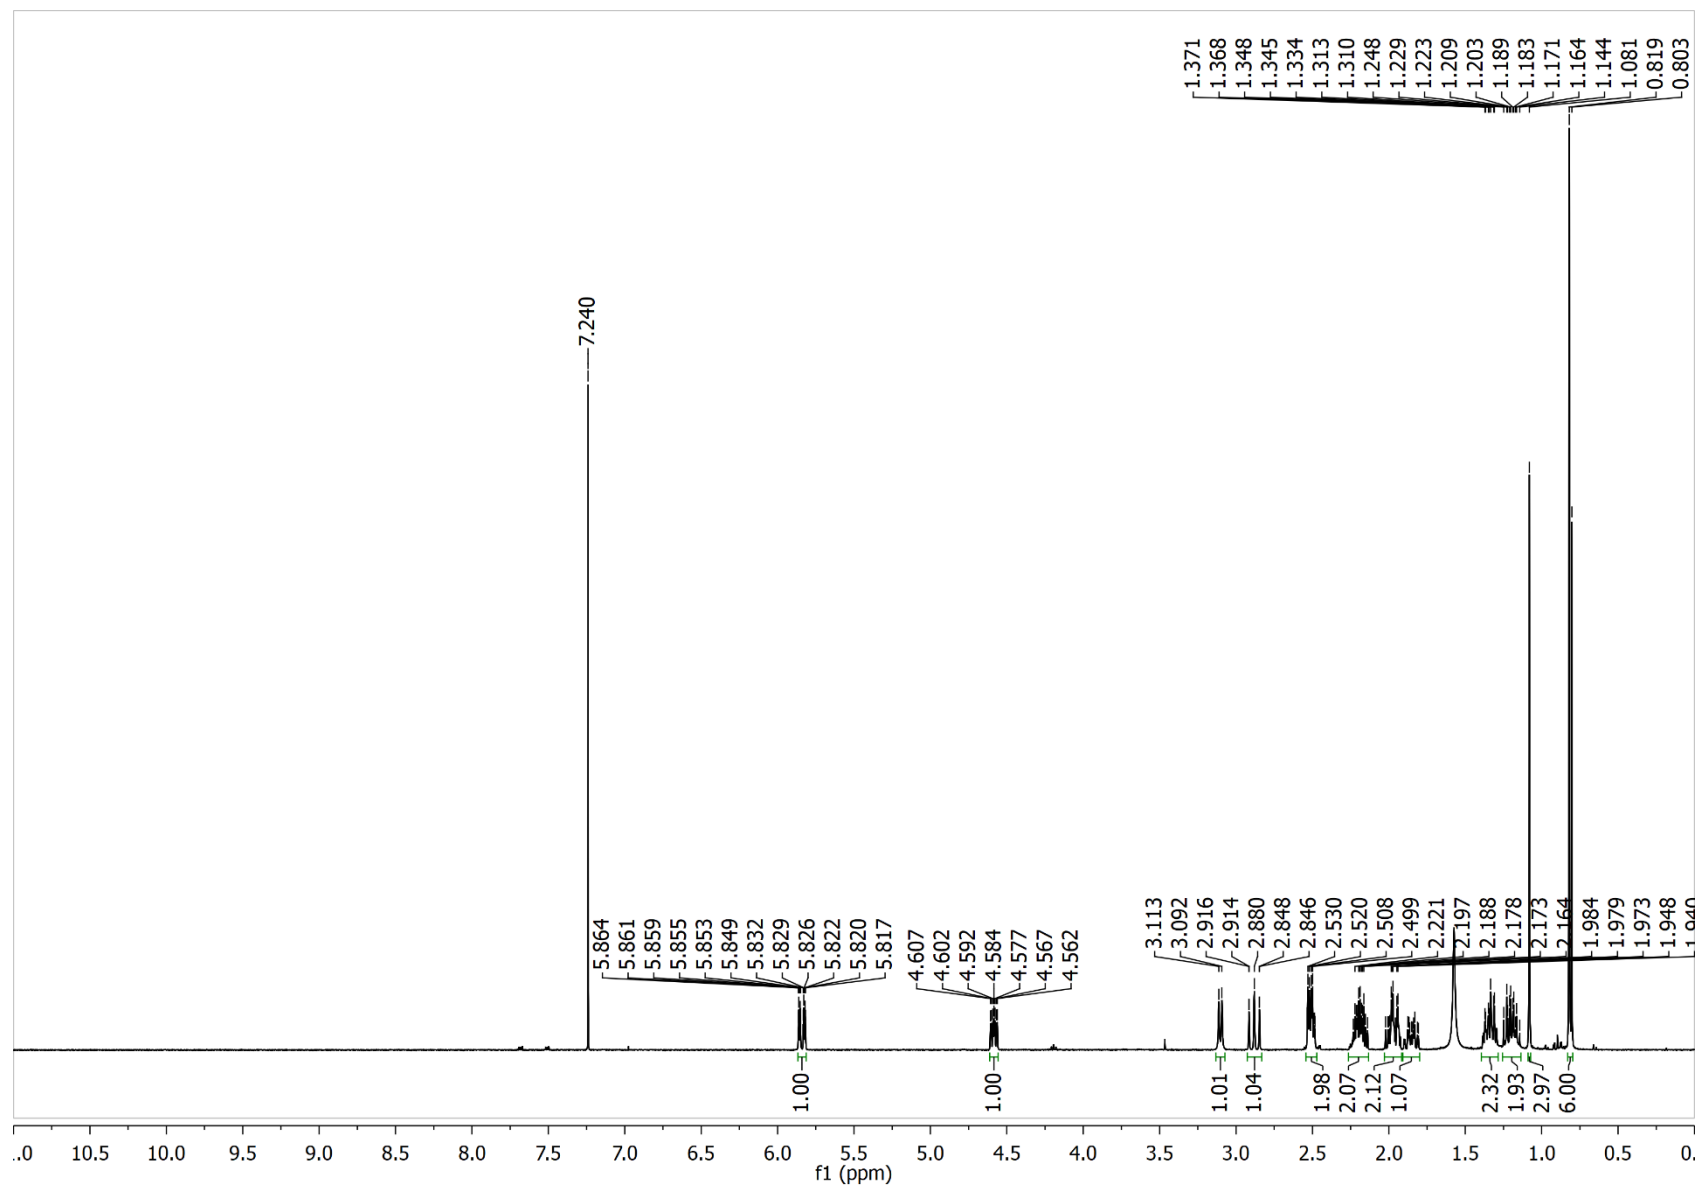



**Figure S4.**  $^1\text{H}$  NMR (400 MHz,  $\text{CDCl}_3$ ) extension spectrum of **1**

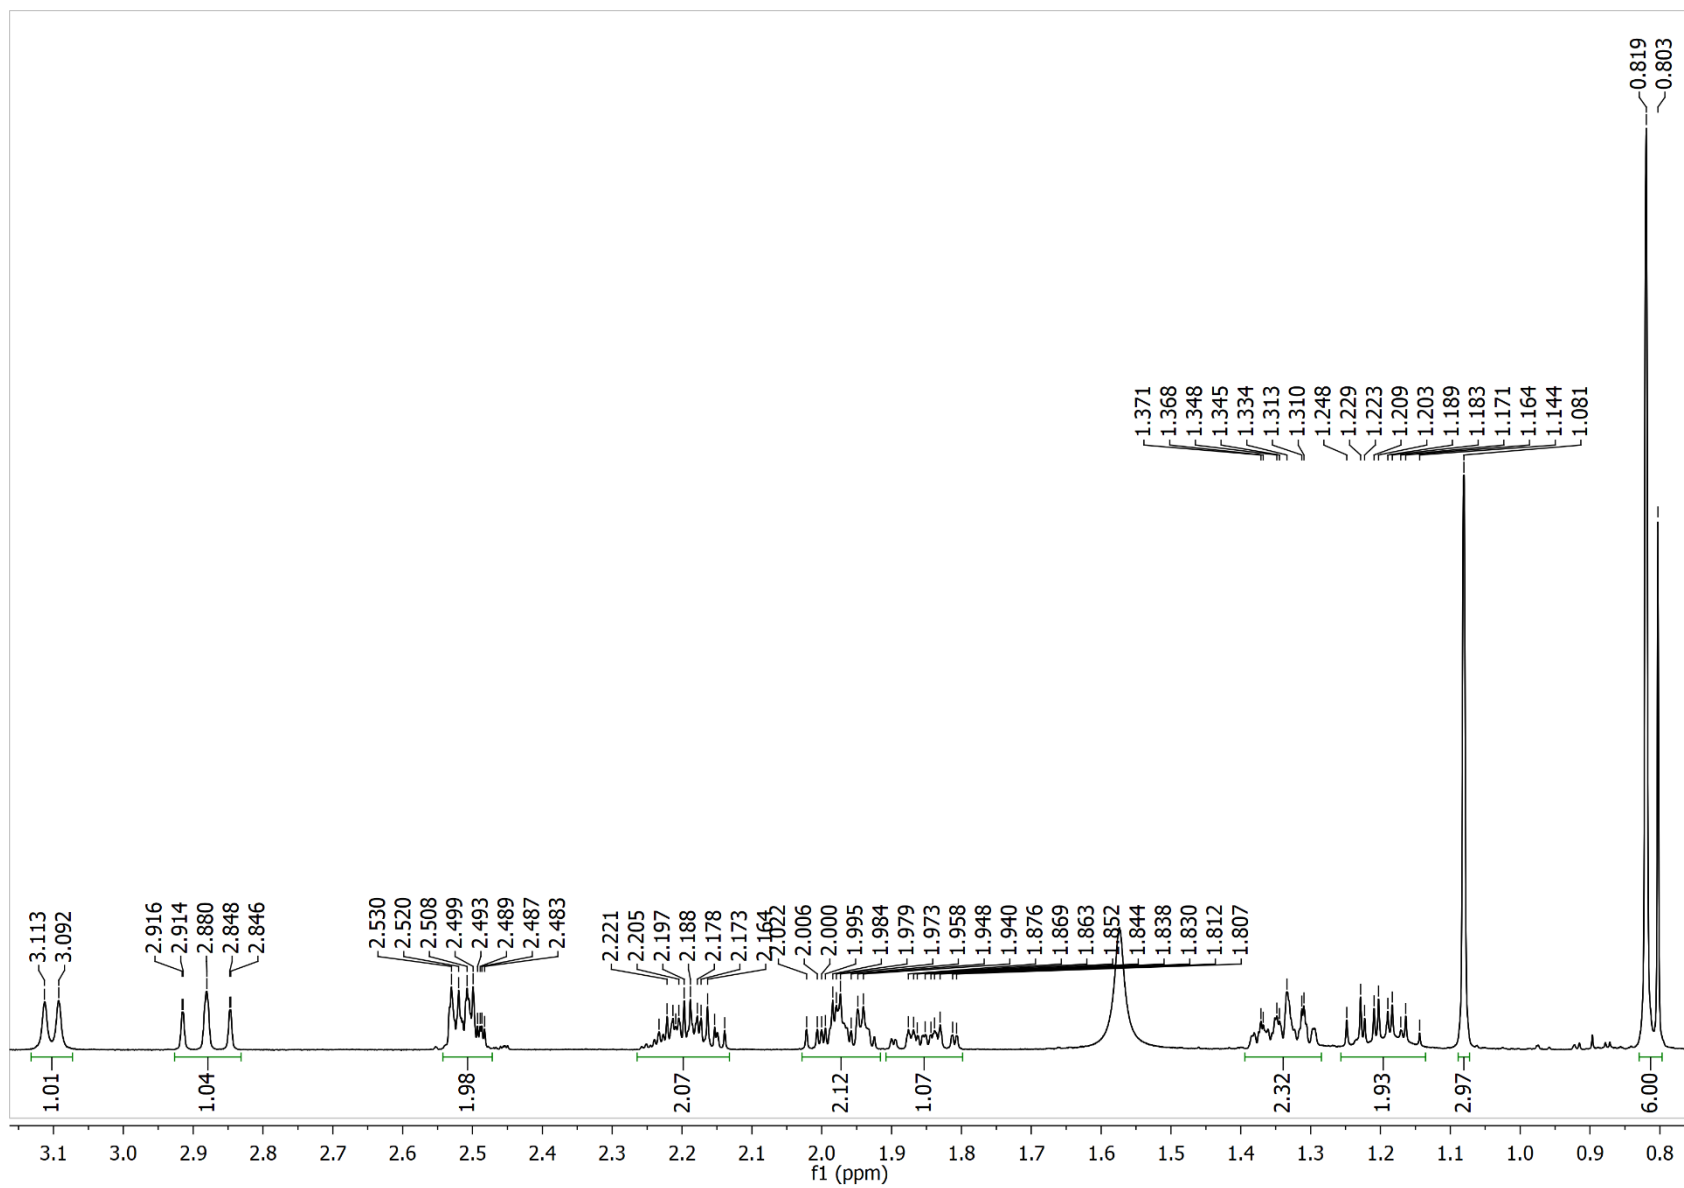

**Figure S5.**  $^{13}\text{C}$  NMR (100 MHz,  $\text{CDCl}_3$ ) spectrum of **1**

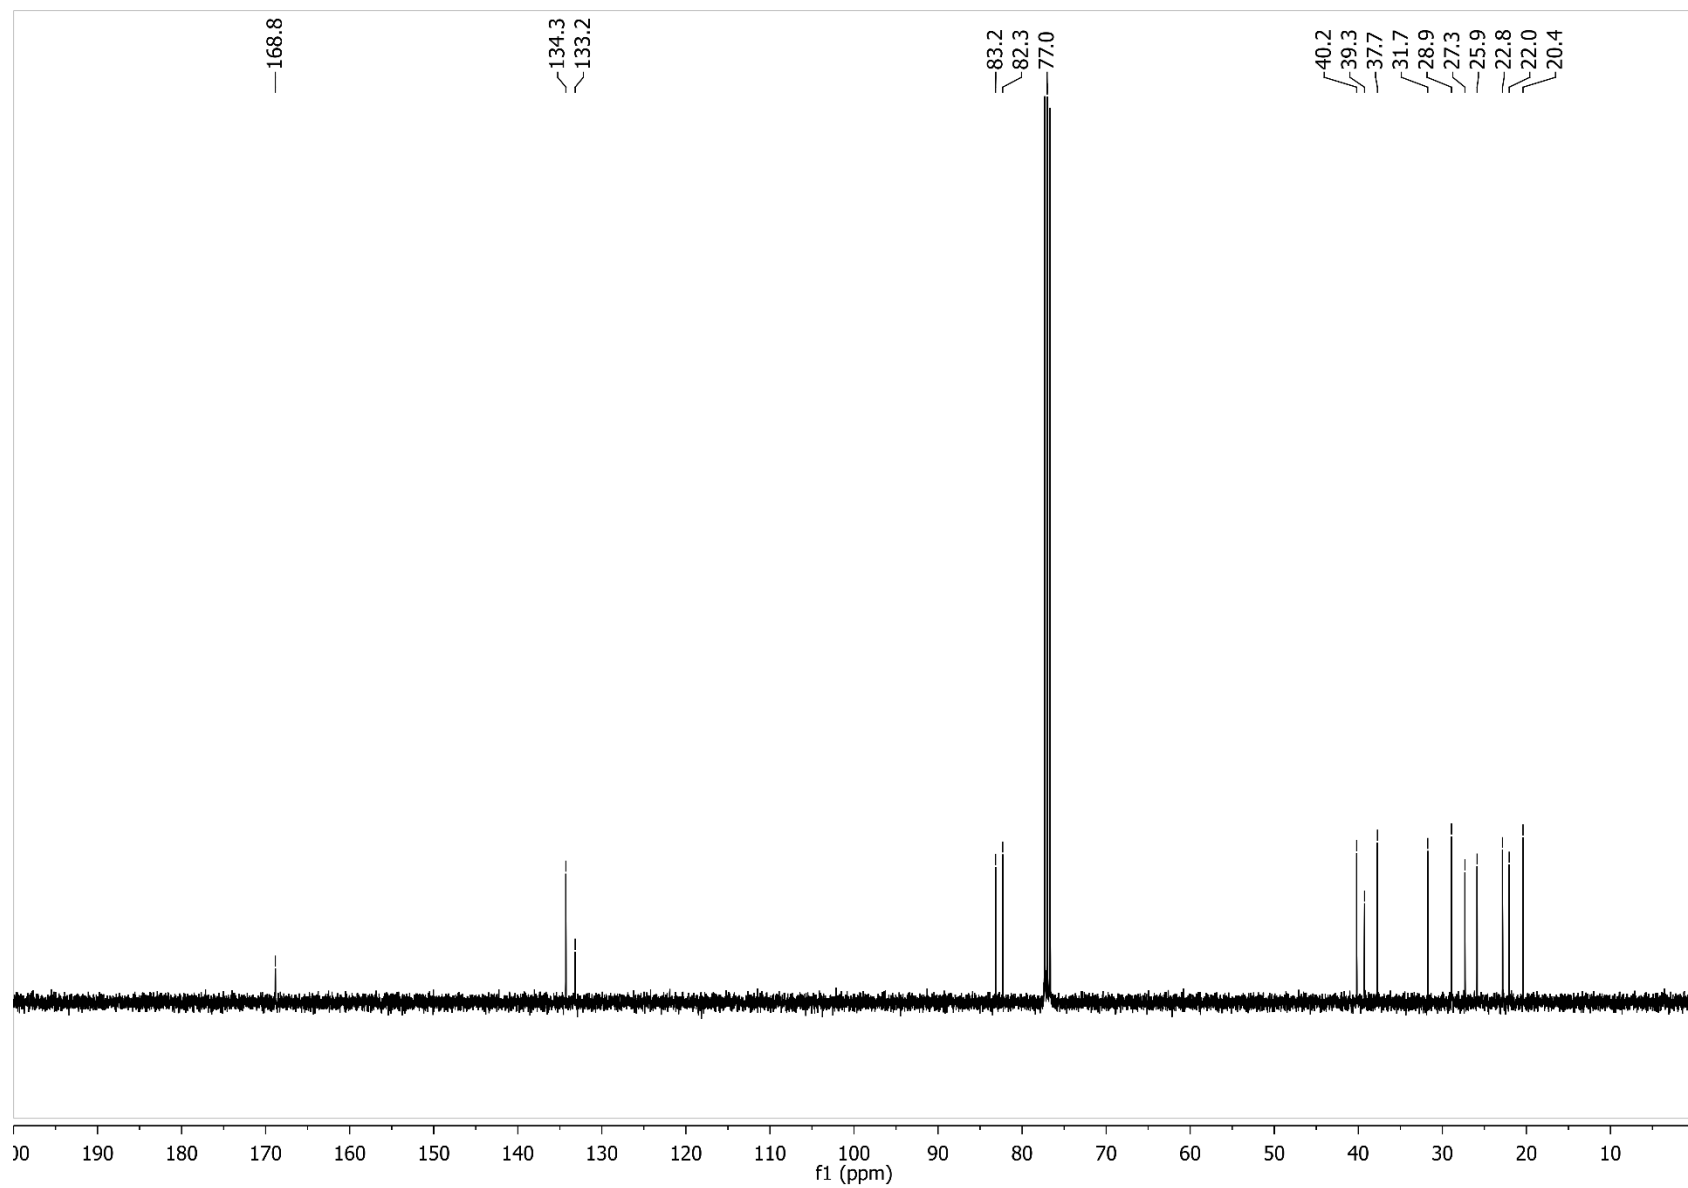

**Figure S6.**  $^{13}\text{C}$  DEPT-135 NMR (100 MHz,  $\text{CDCl}_3$ ) spectrum of **1**

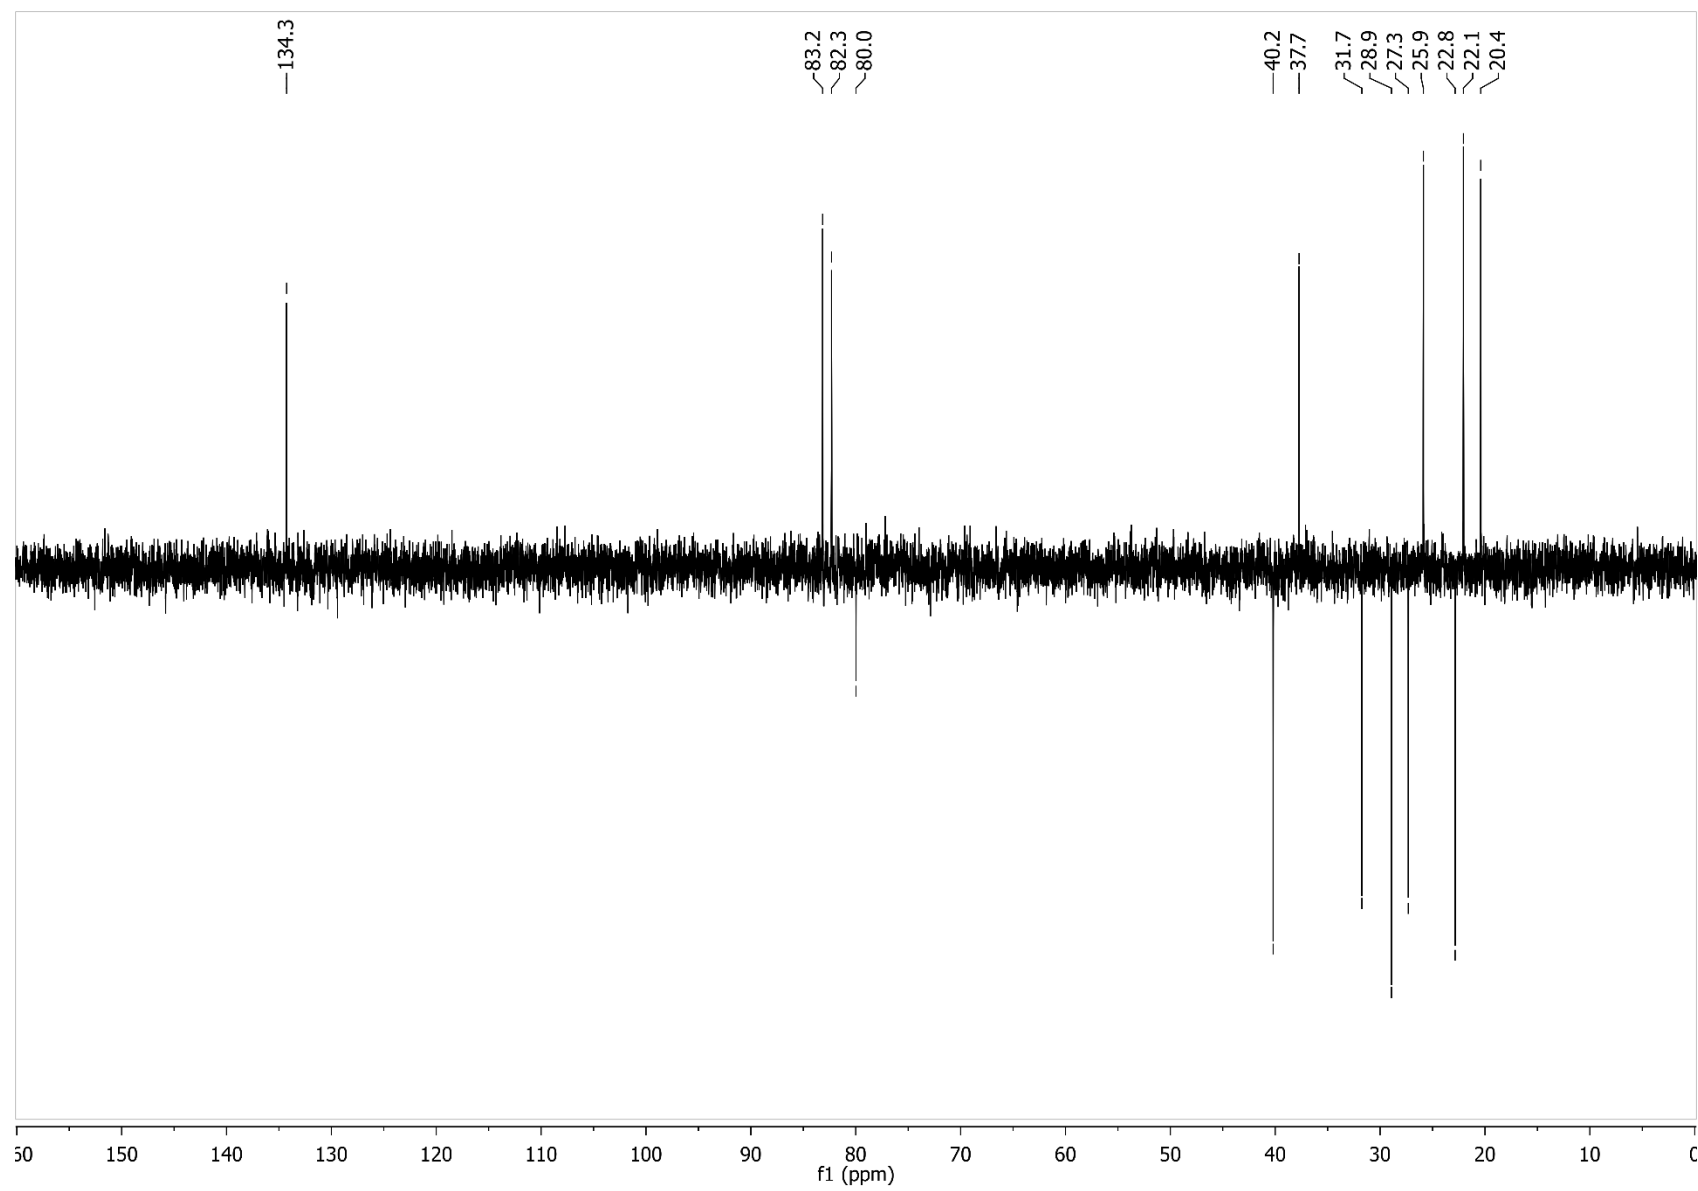

**Figure S7.** HSQC NMR (400 MHz, CDCl<sub>3</sub>) spectrum of **1**

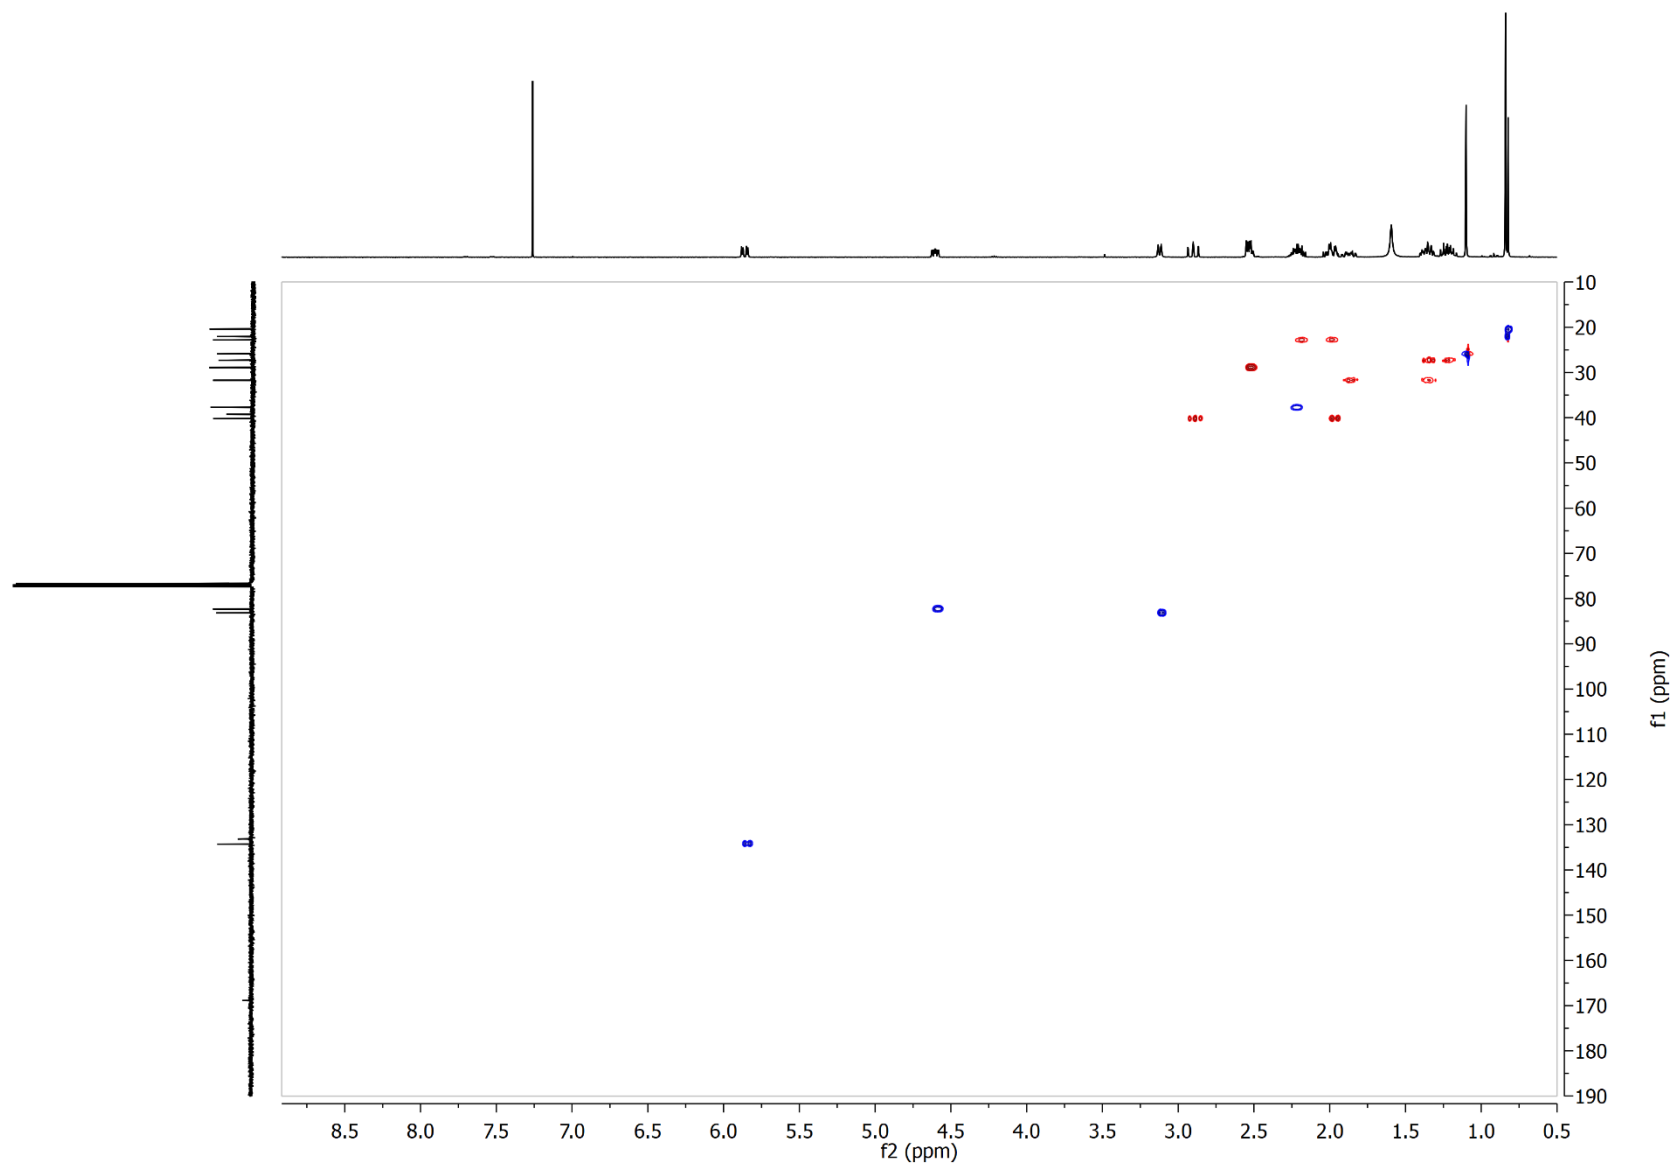

**Figure S8.** HSQC NMR (400 MHz, CDCl<sub>3</sub>) extension spectrum of **1**

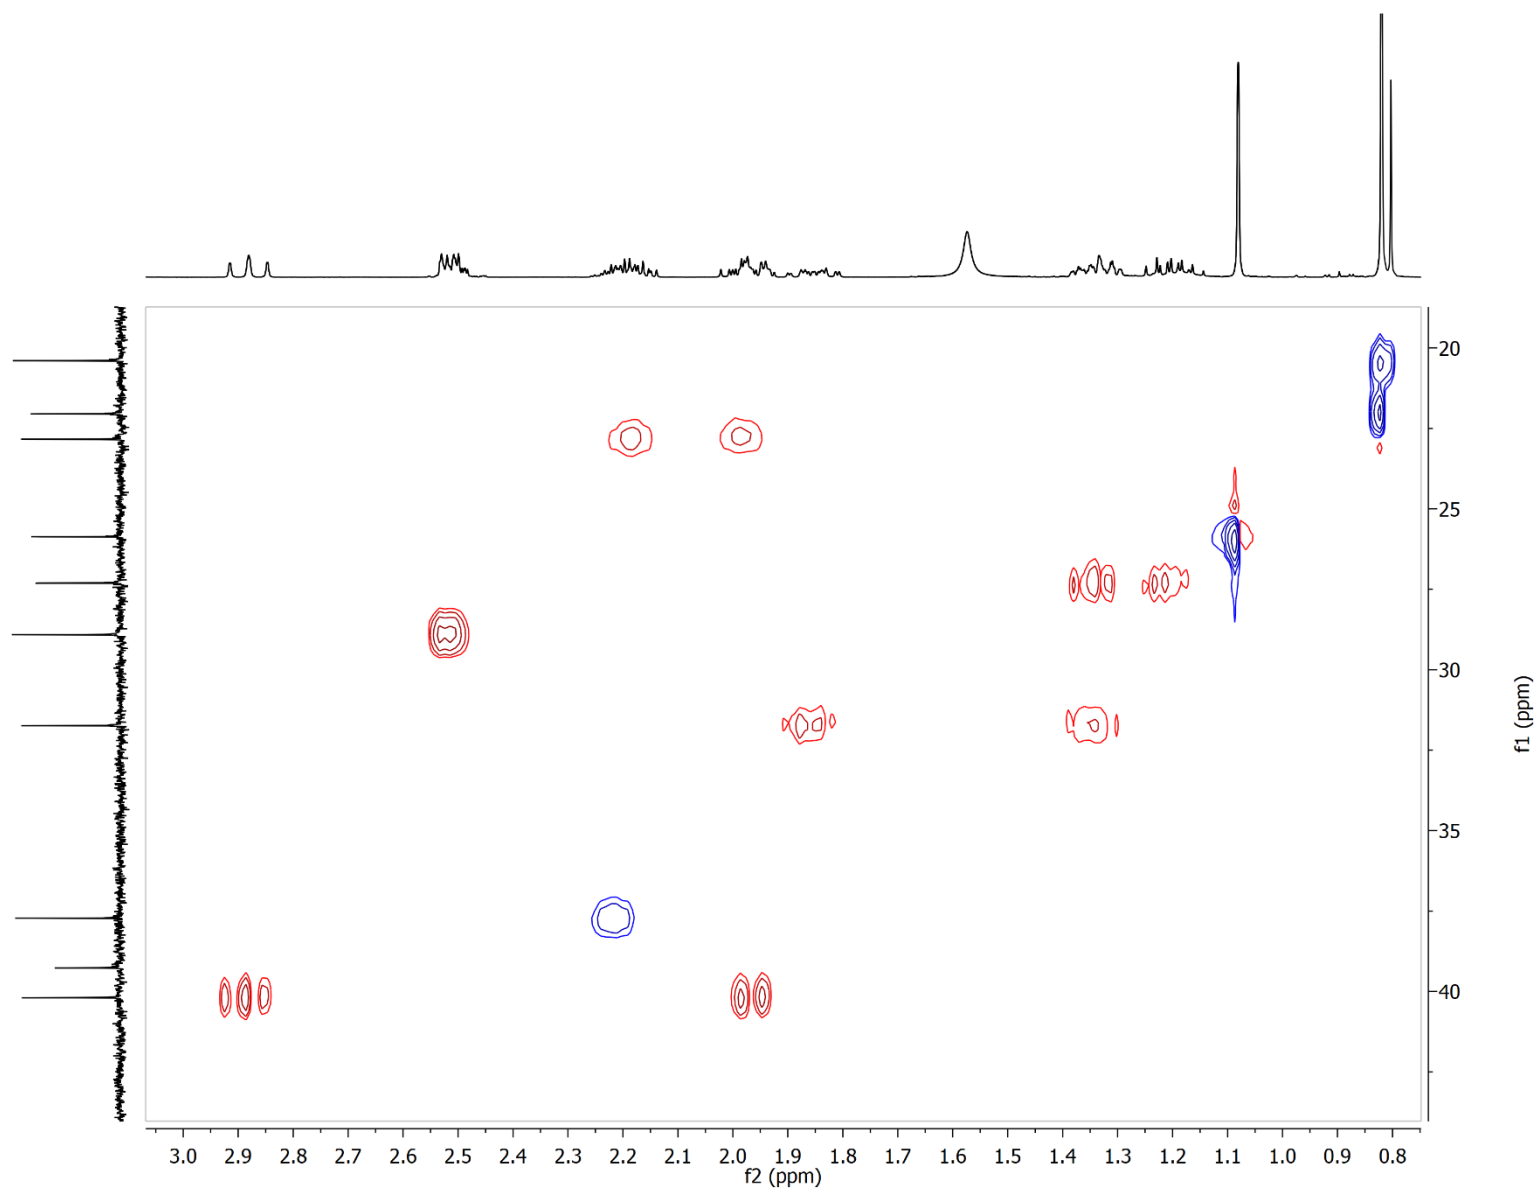

**Figure S9.** HMBC NMR (400 MHz, CDCl<sub>3</sub>) spectrum of **1**

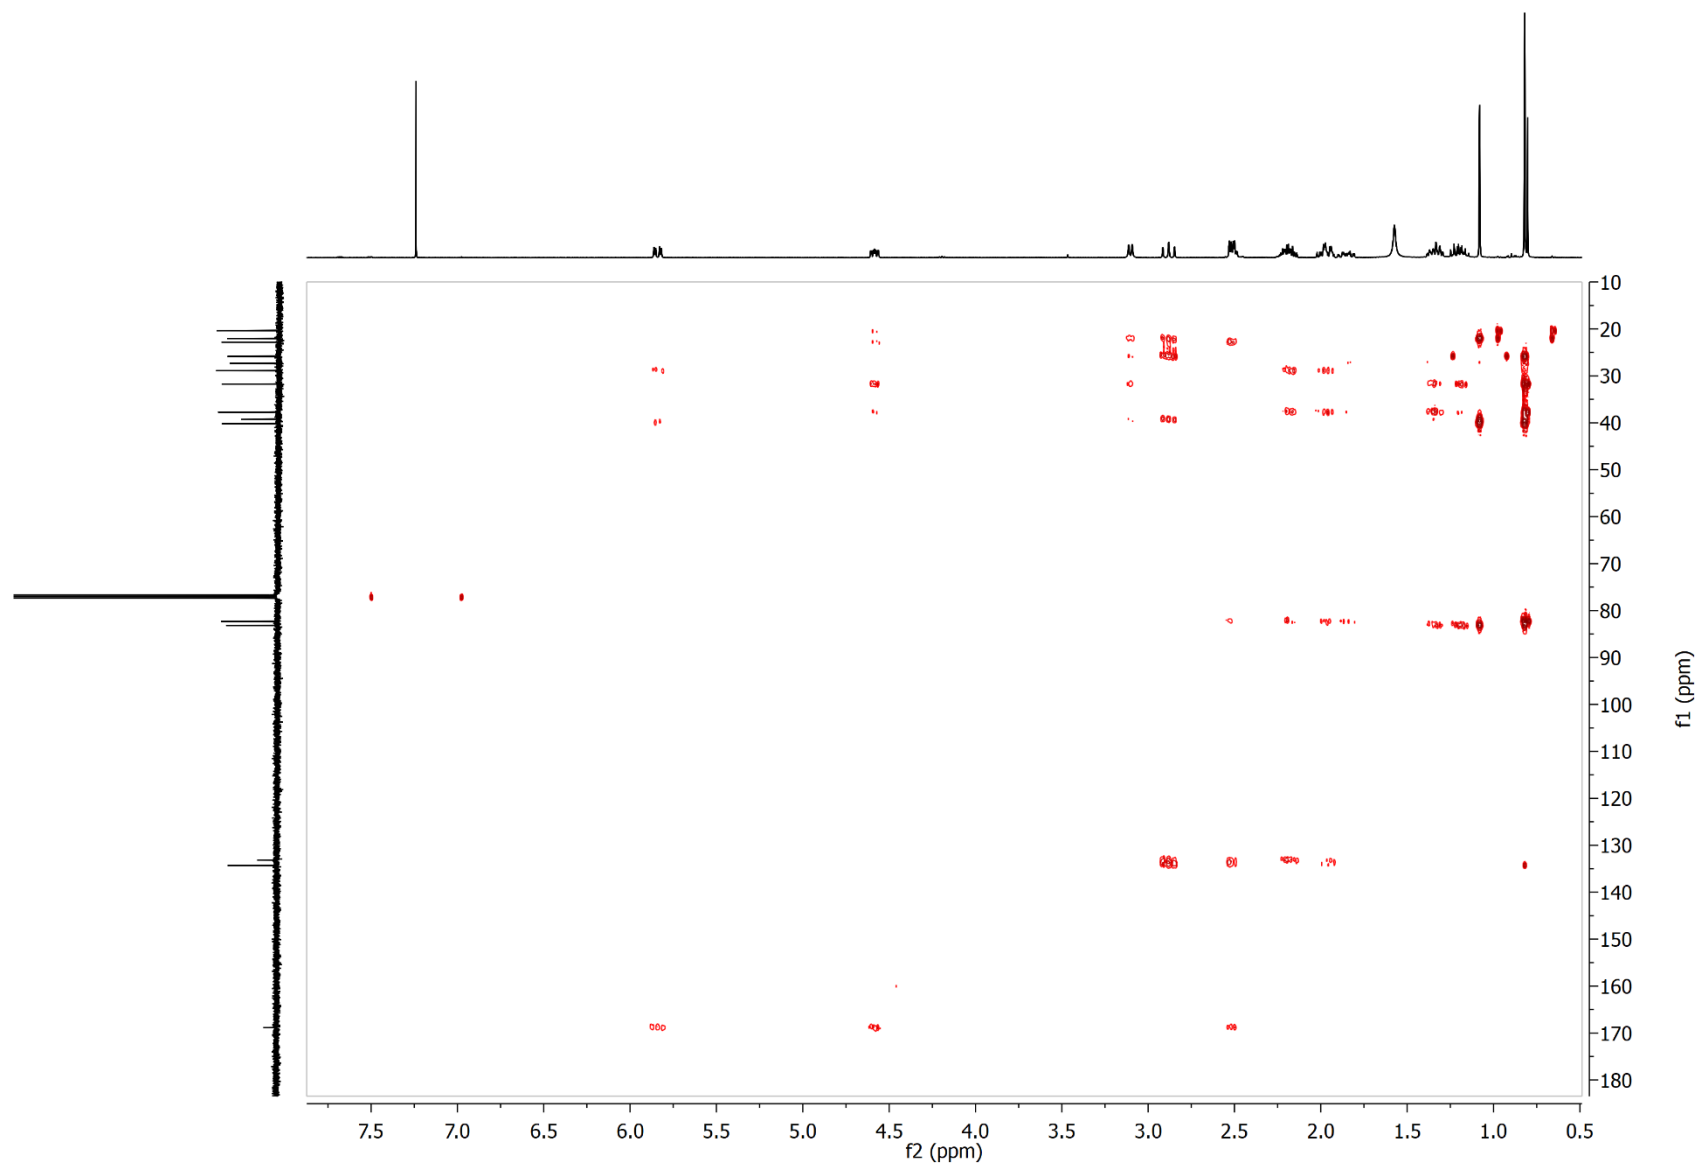

**Figure S10.** HMBC NMR (400 MHz, CDCl<sub>3</sub>) extension spectrum of **1**

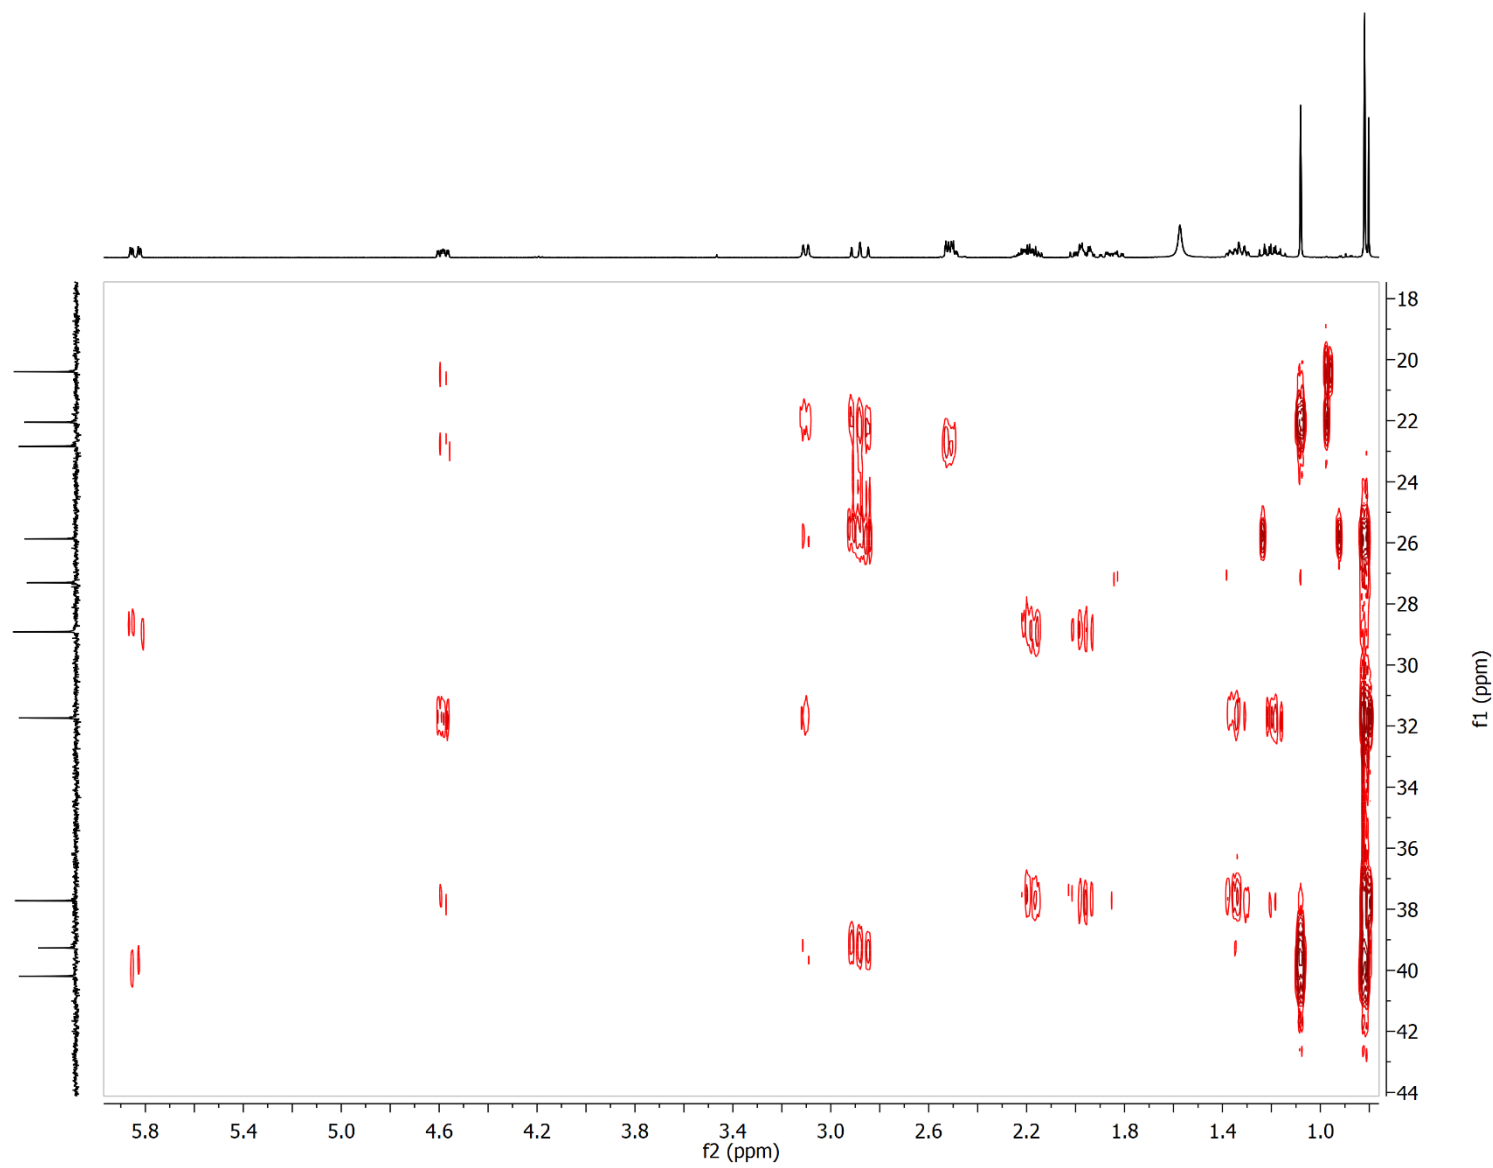

**Figure S11.** HMBC NMR (400 MHz, CDCl<sub>3</sub>) extension spectrum of **1**

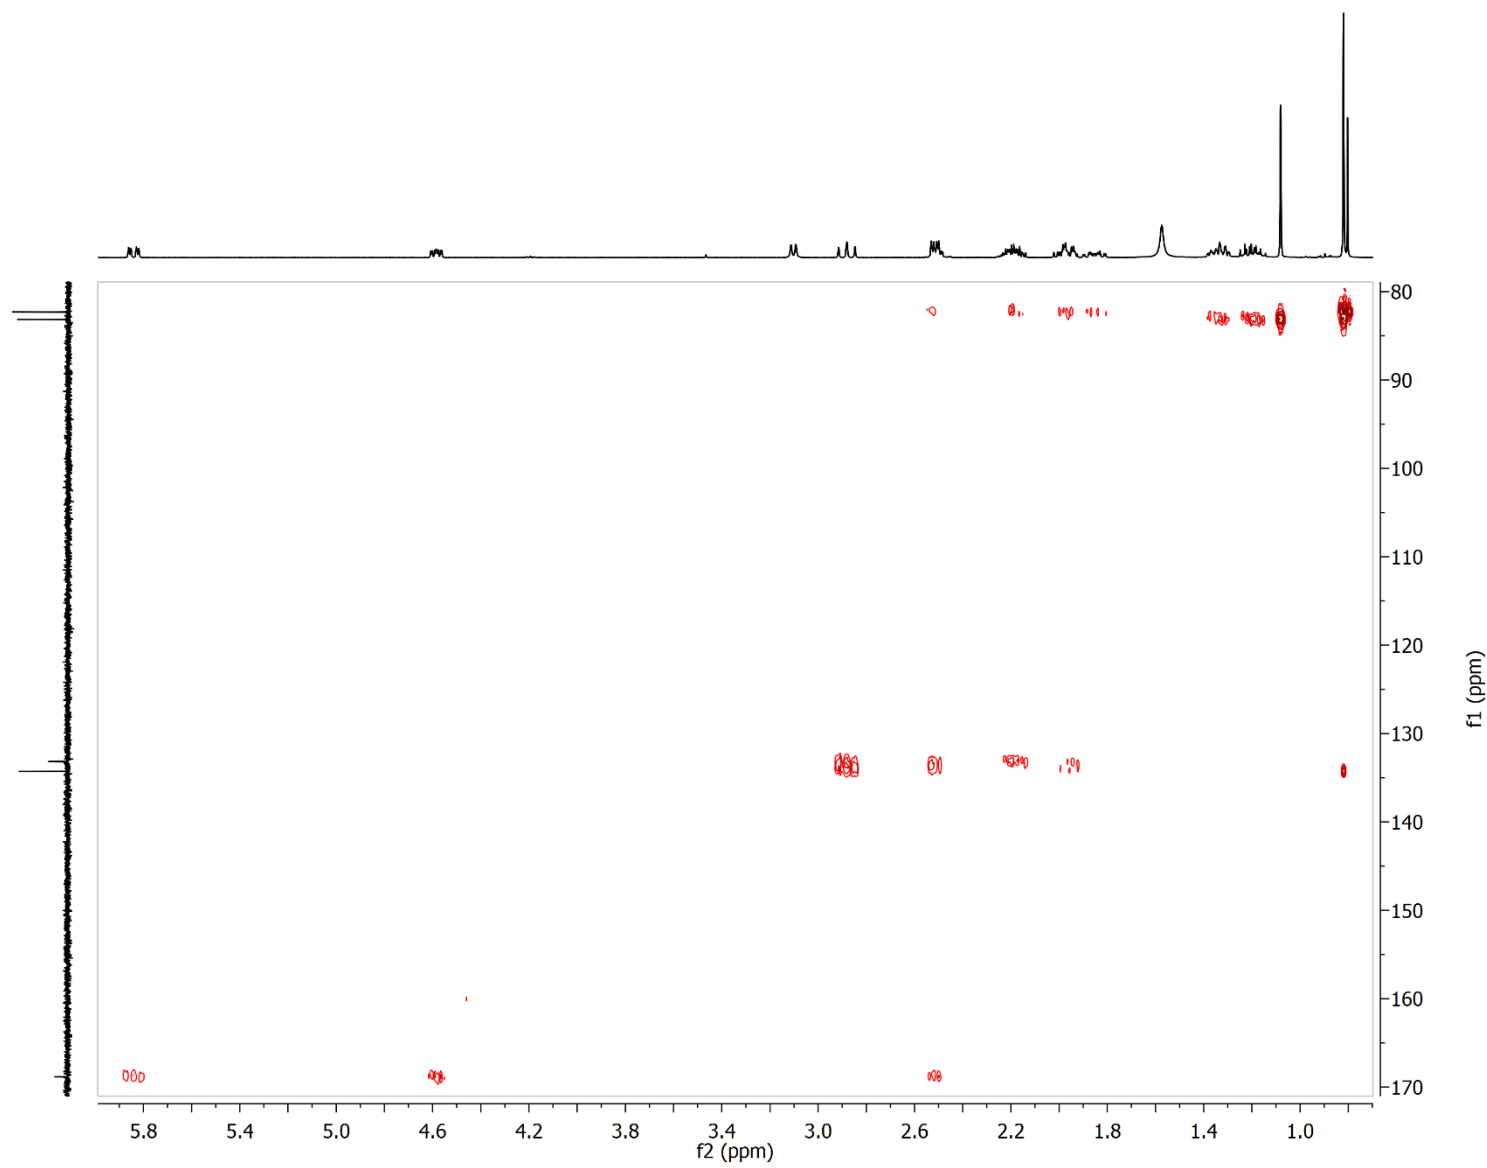



**Figure S12.**  $^1\text{H}$ - $^1\text{H}$  COSY NMR (400 MHz,  $\text{CDCl}_3$ ) spectrum of **1**

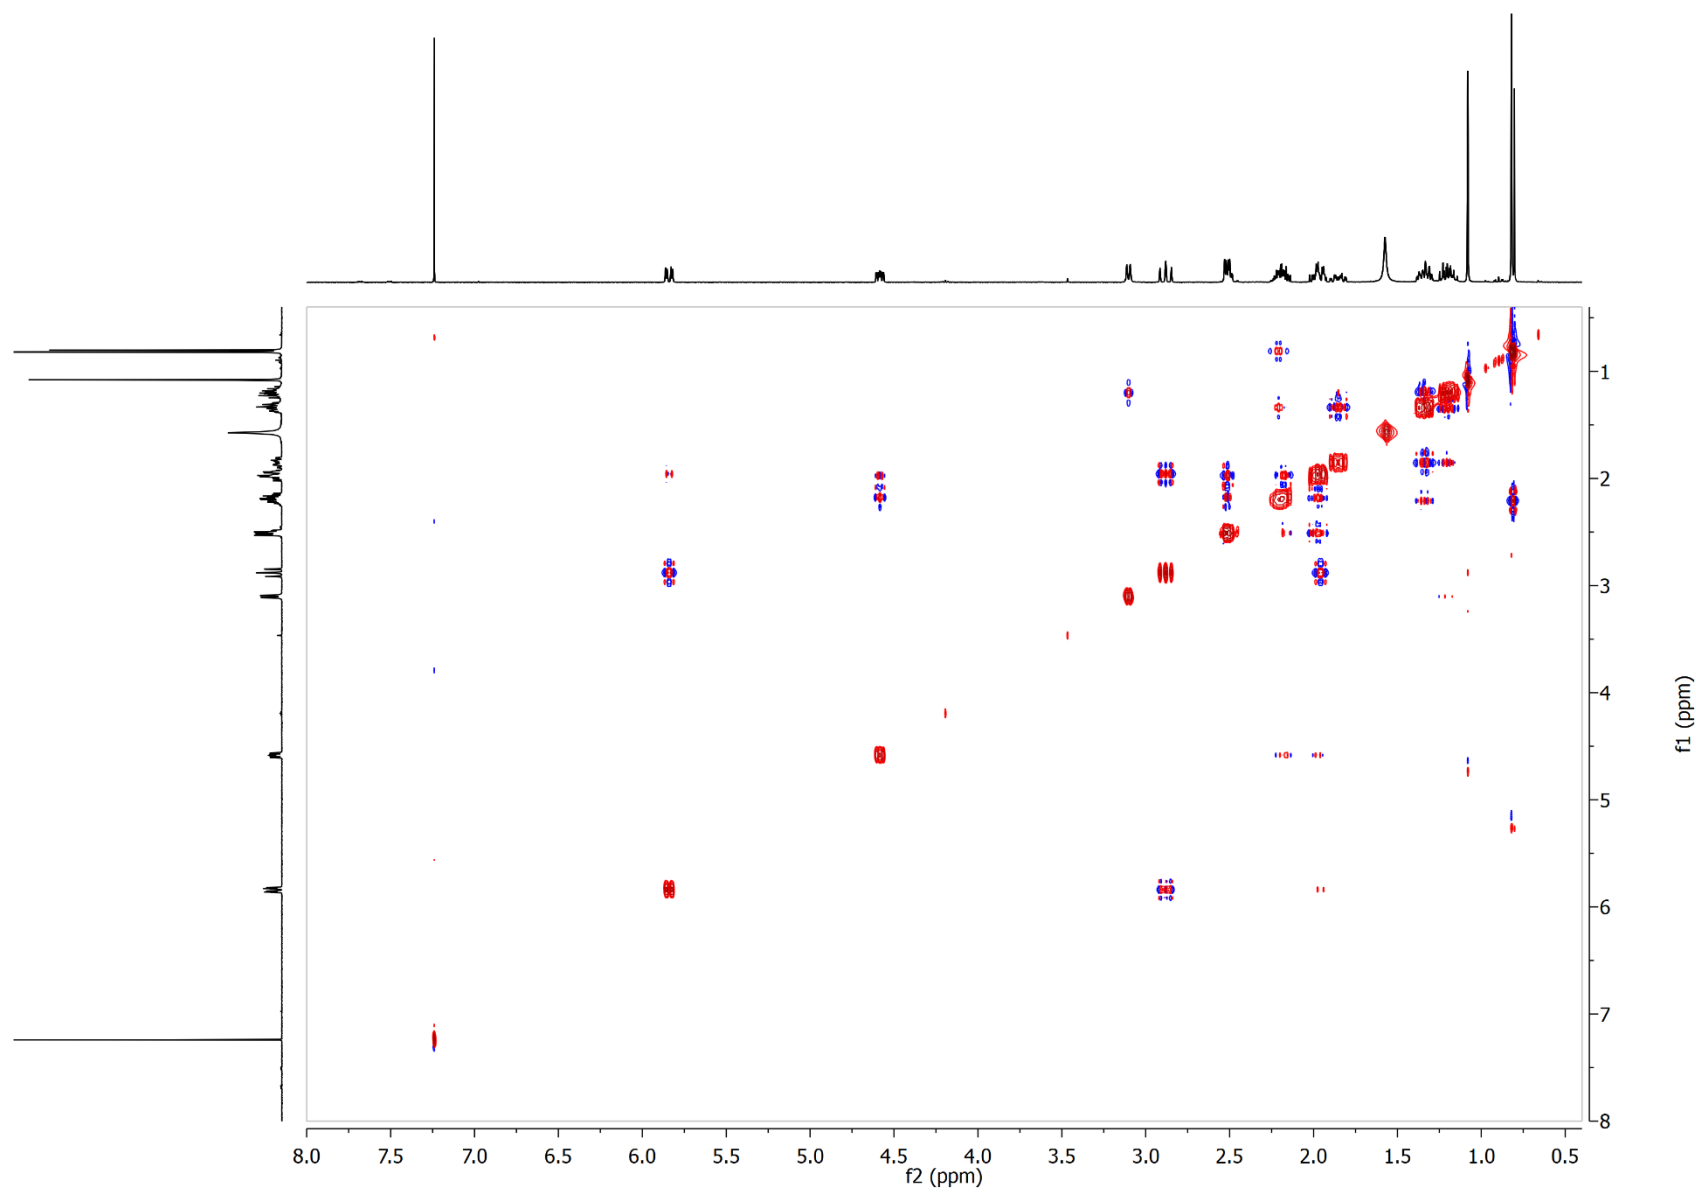

**Figure S13.**  $^1\text{H}$ - $^1\text{H}$  NOESY NMR (400 MHz,  $\text{CDCl}_3$ ) spectrum of **1**

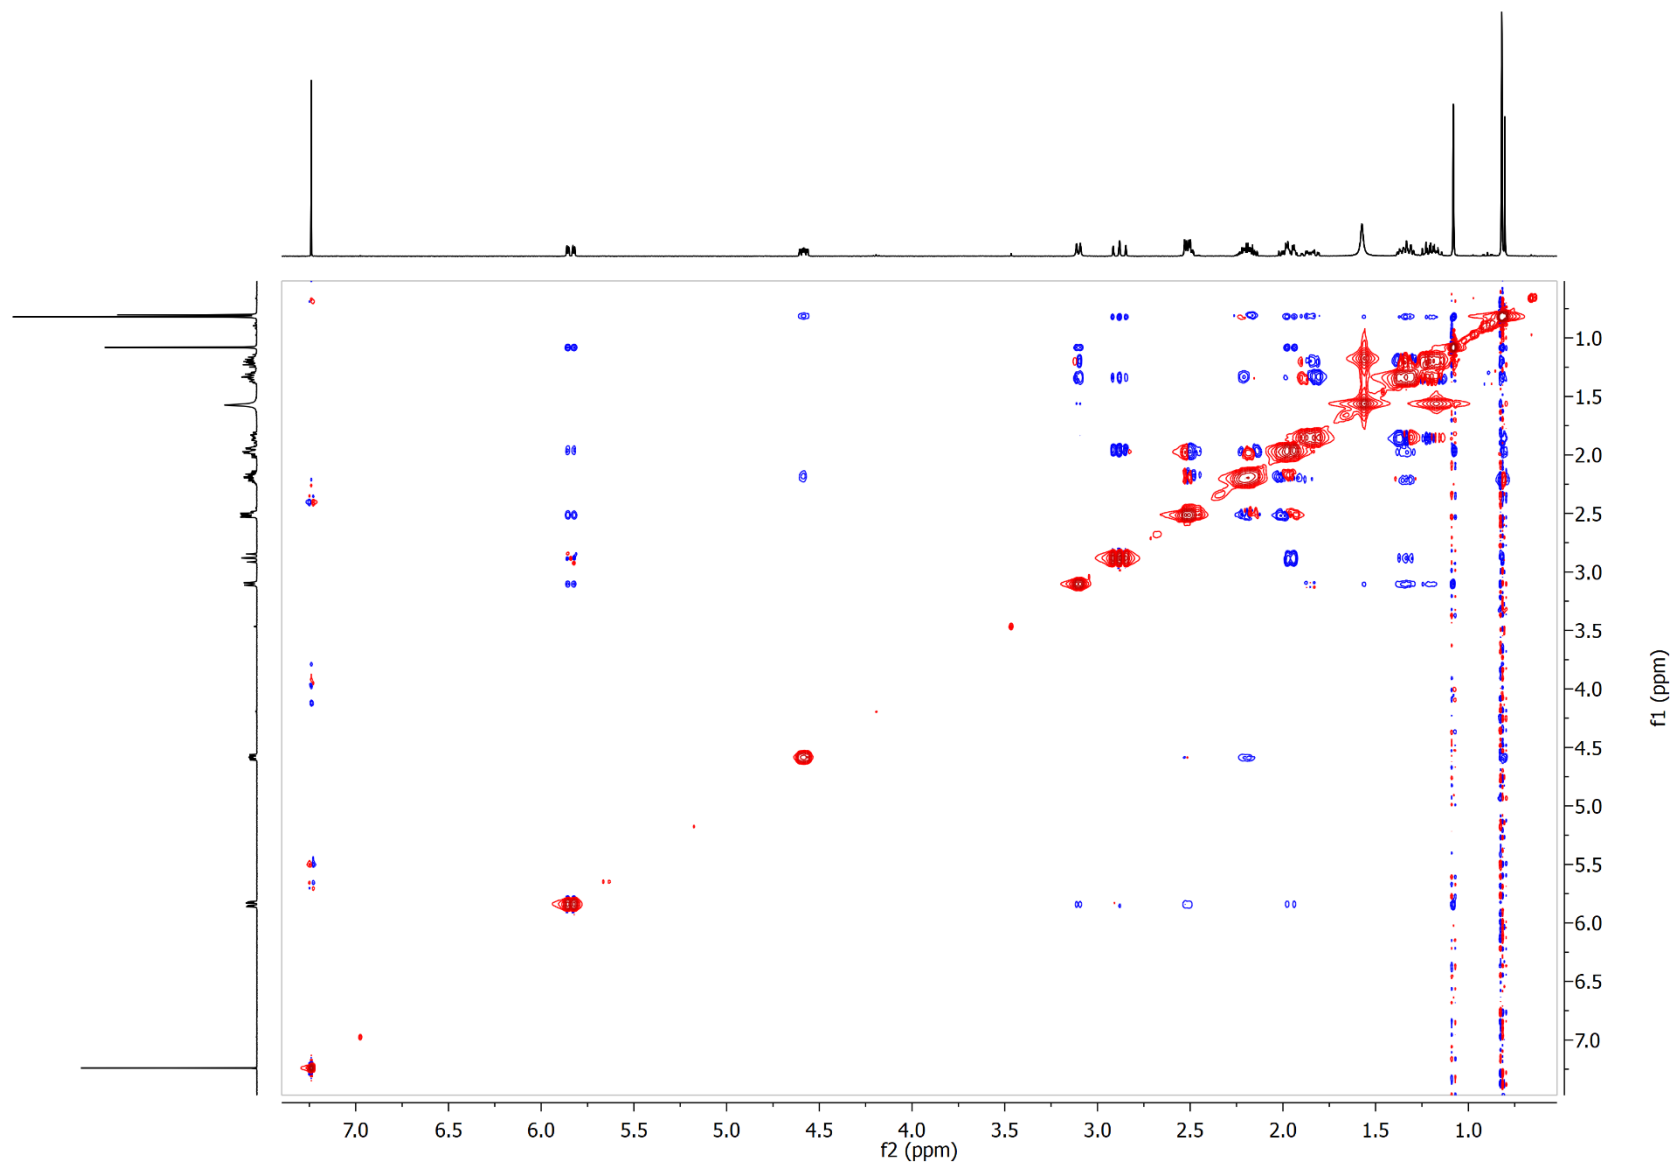

**Figure S14.**  $^1\text{H}$ - $^1\text{H}$  NOESY NMR (400 MHz,  $\text{CDCl}_3$ ) extension spectrum of **1**

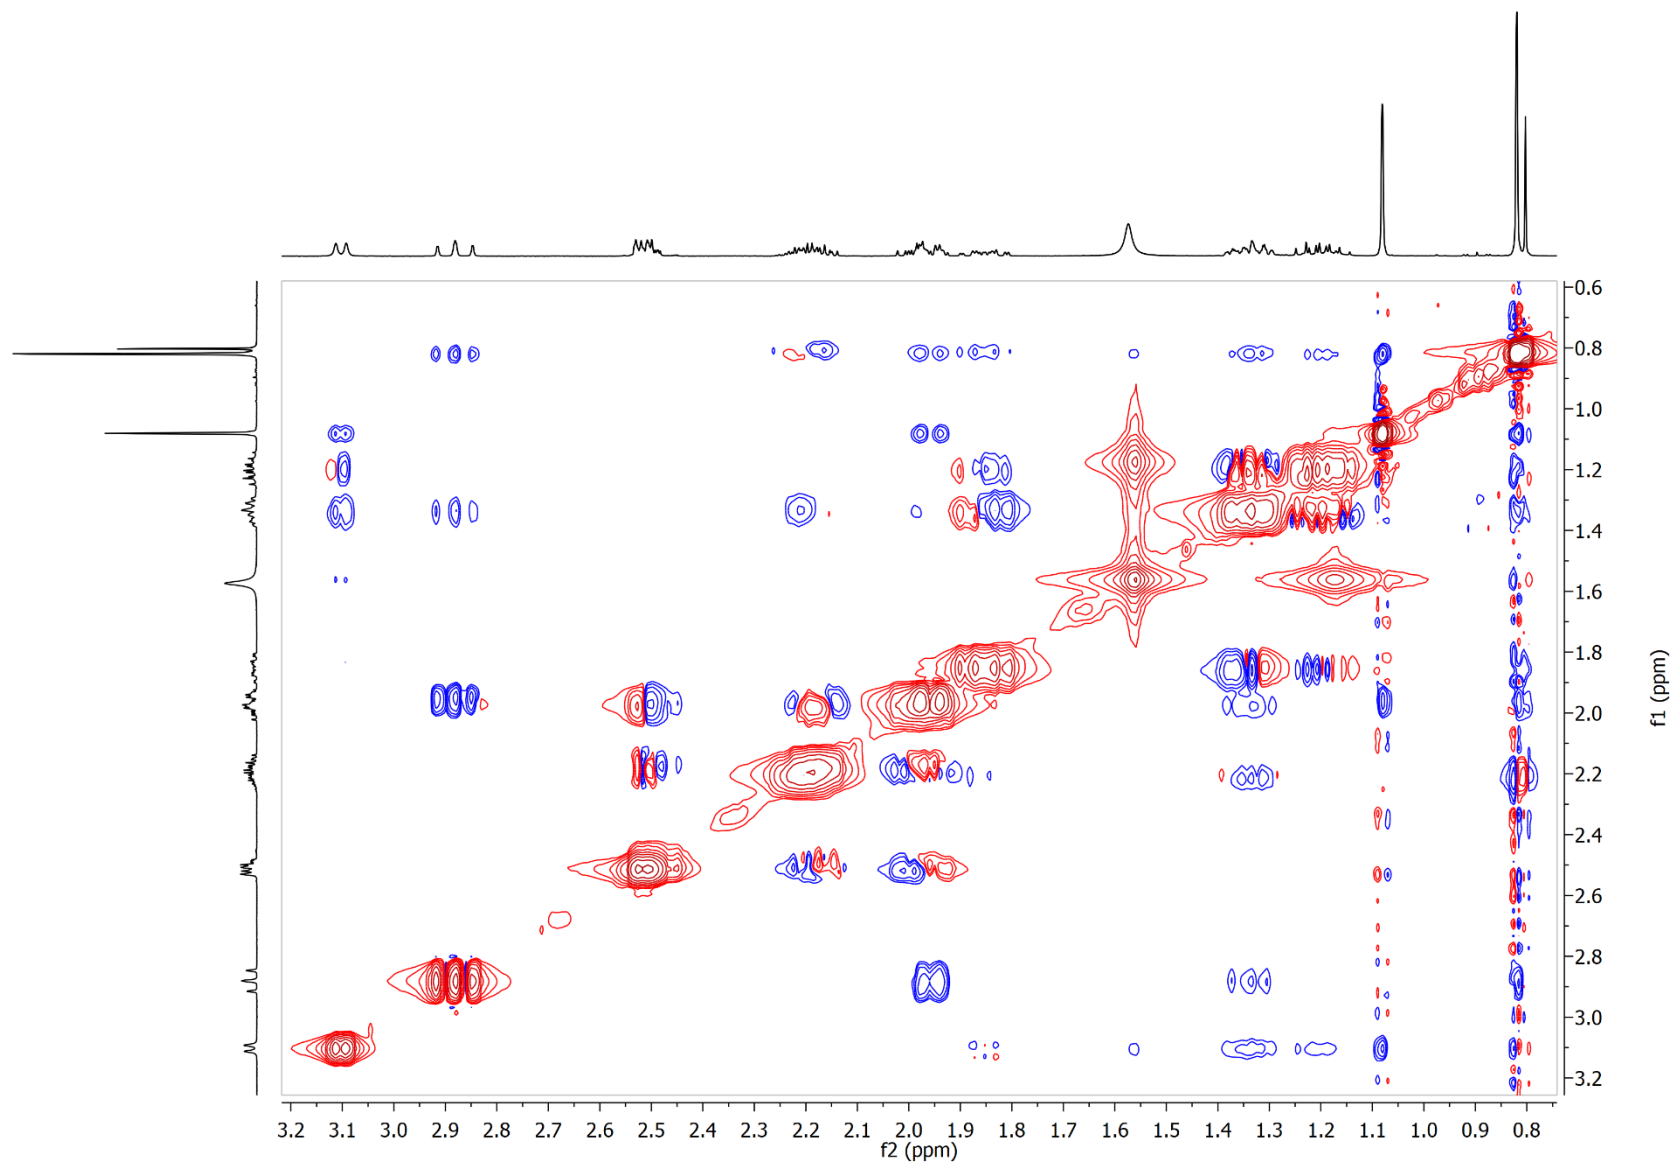

**Figure S15.** ESIMS/MS spectrum of compound **1** ( $[M + Na]$ , positive ion mode)

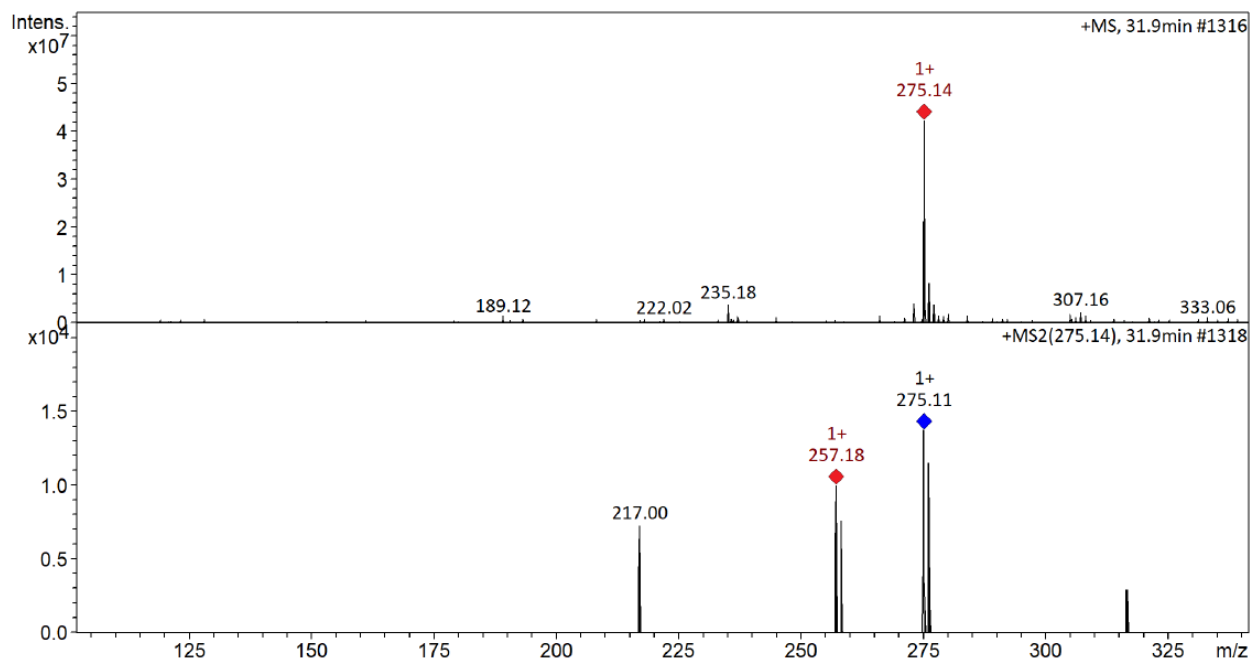

**Figure S16.** Experimental and calculated ECD spectra and absorption spectra of compounds **1-3** and **6**

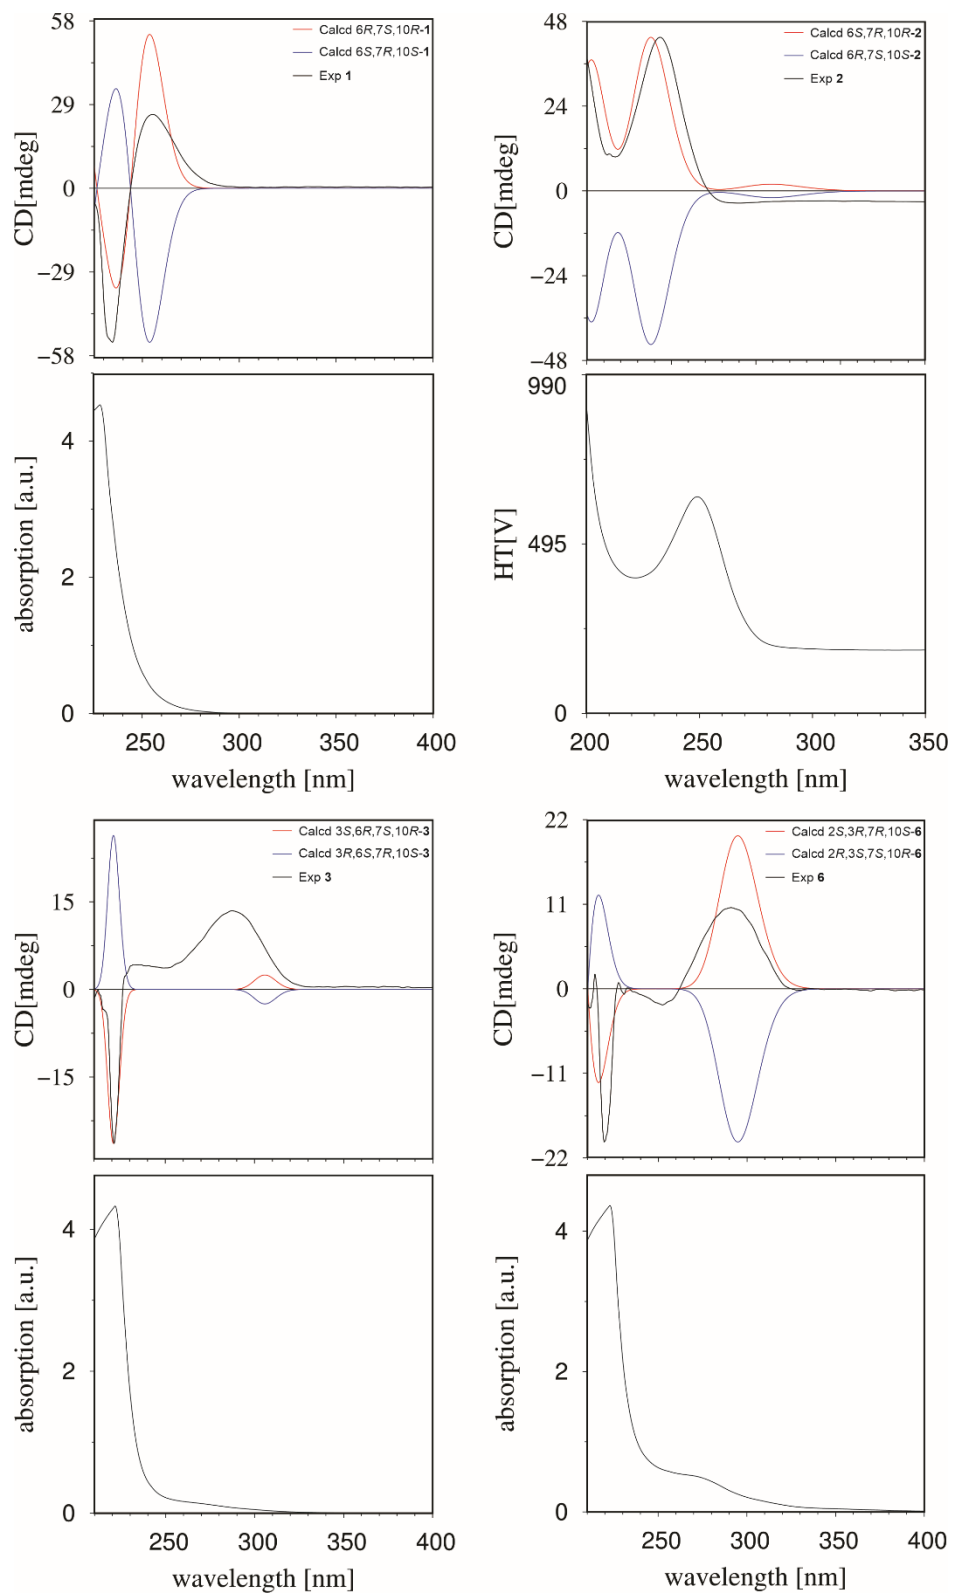

**Figure S17.** IR spectrum of compound **2**

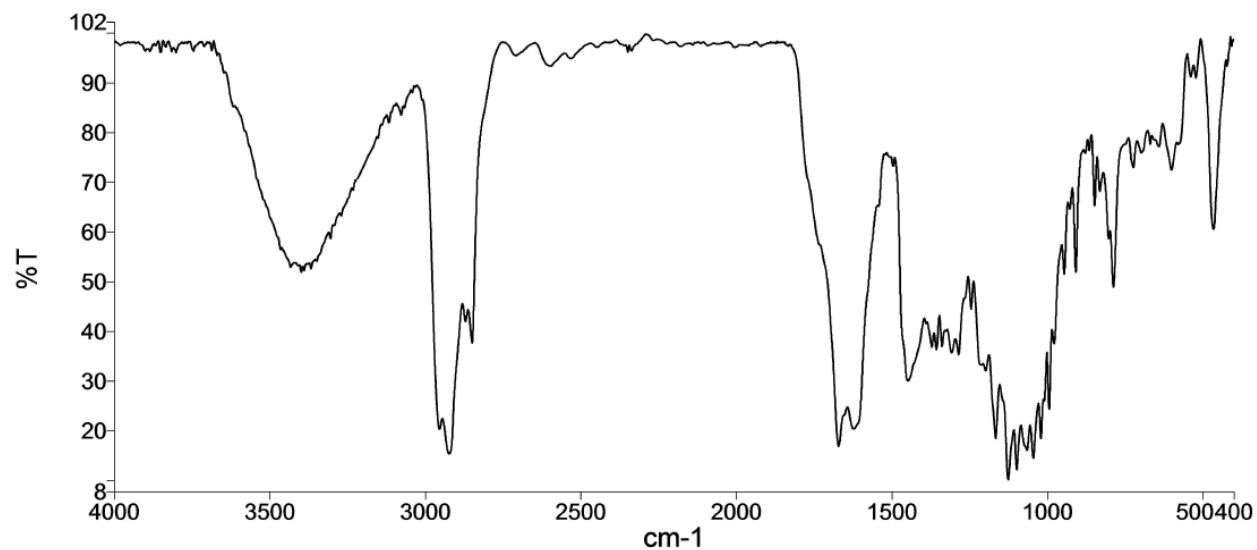

**Figure S18.** HRESIMS spectrum of compound **2** ([M + Na], positive ion mode)

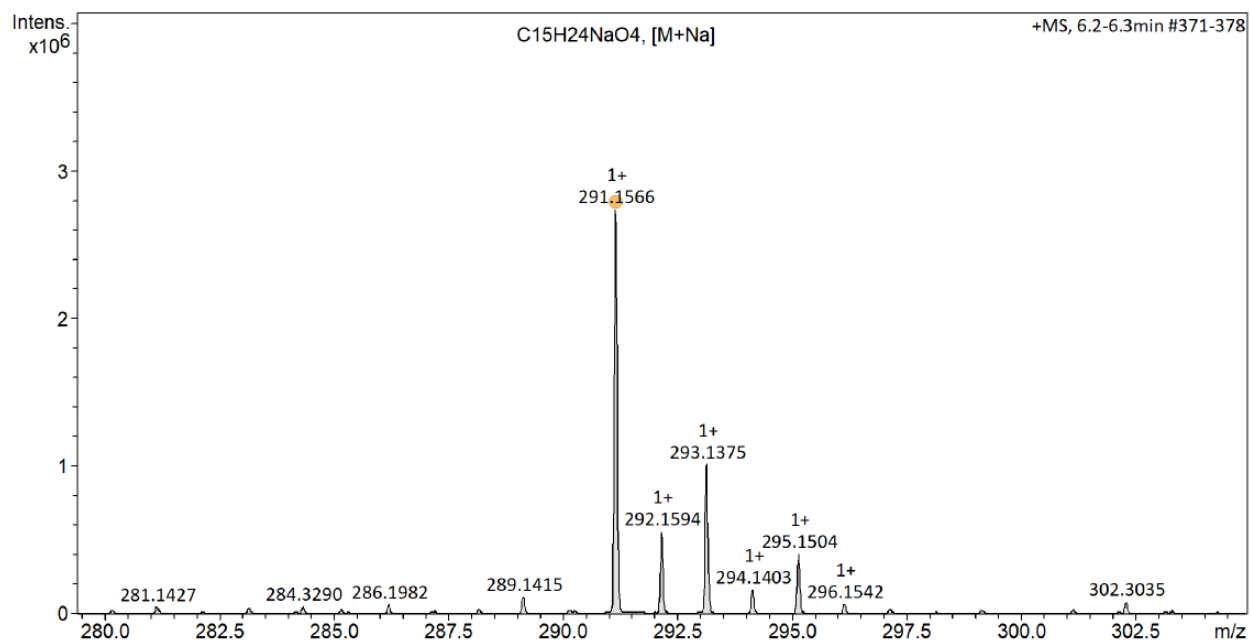

**Figure S19.**  $^1\text{H}$  NMR (500 MHz,  $\text{CDCl}_3$ ) spectrum of **2**

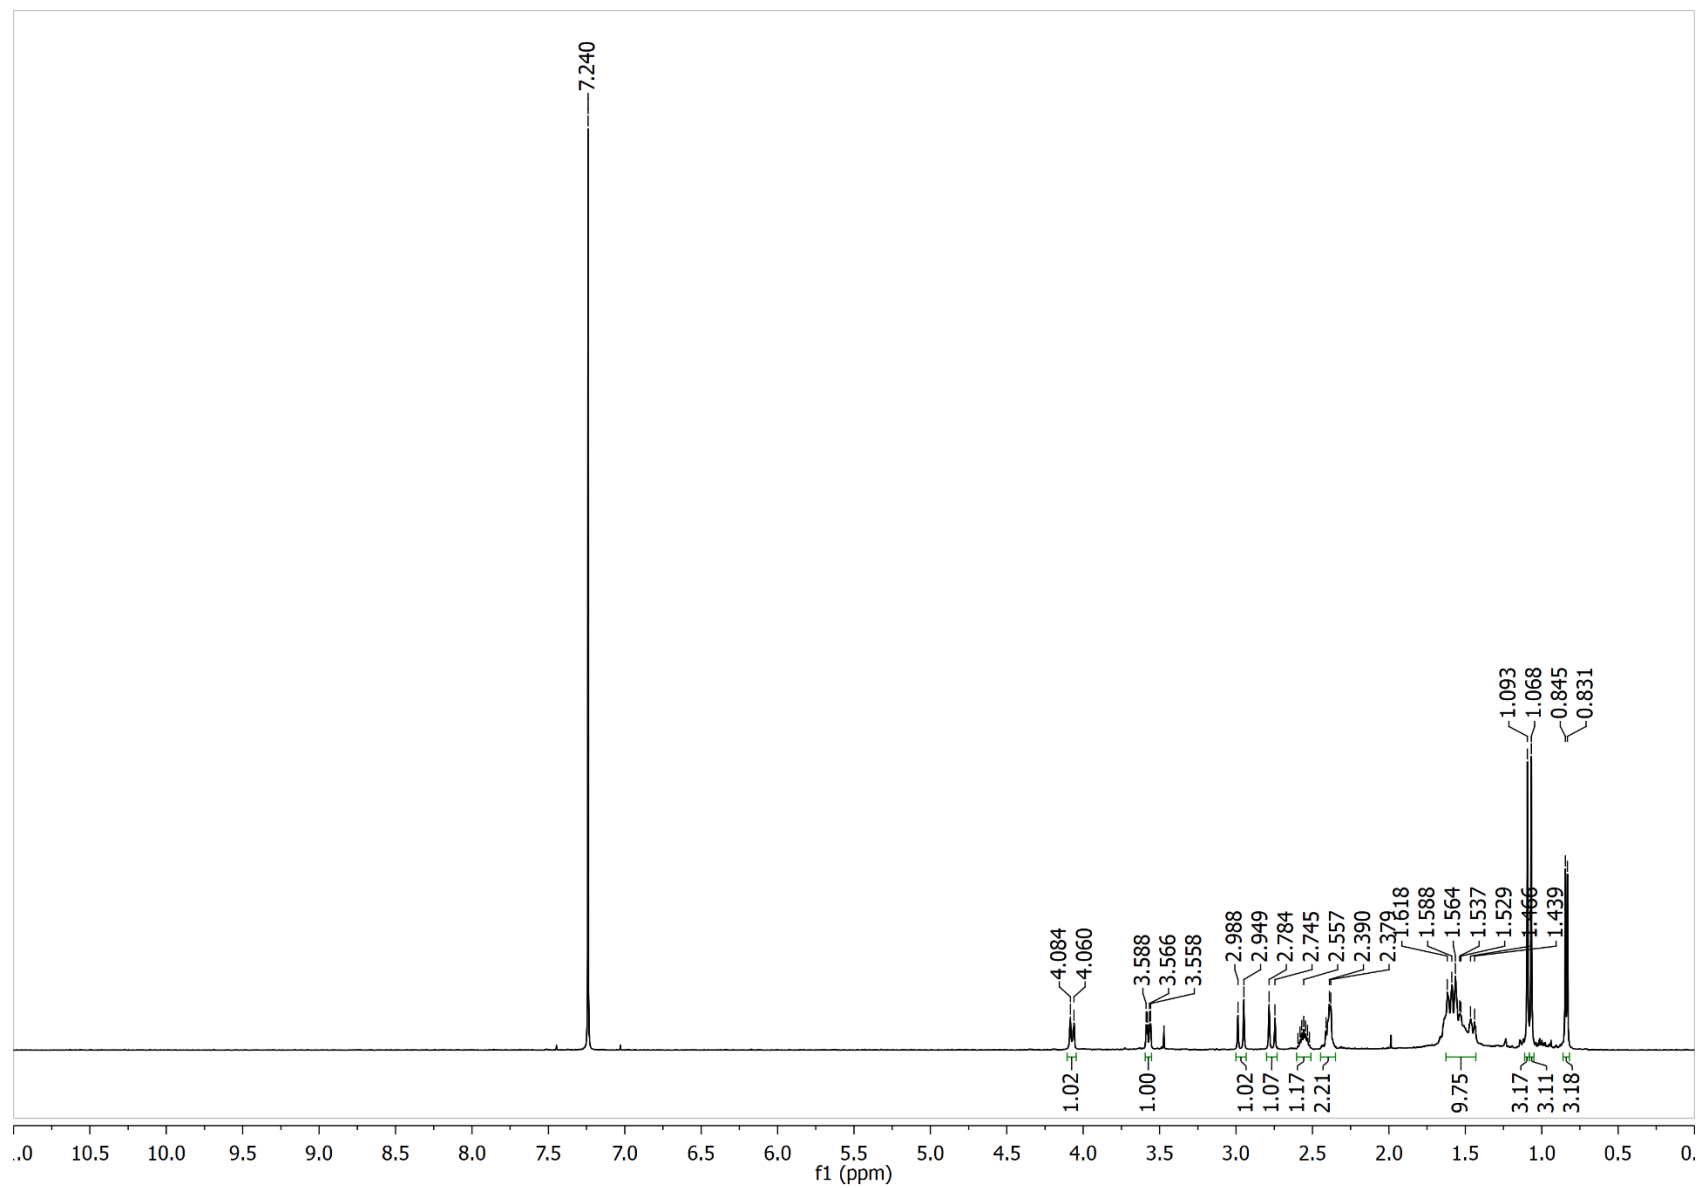

**Figure S20.**  $^1\text{H}$  NMR (500 MHz,  $\text{CDCl}_3$ ) extension spectrum of **2**

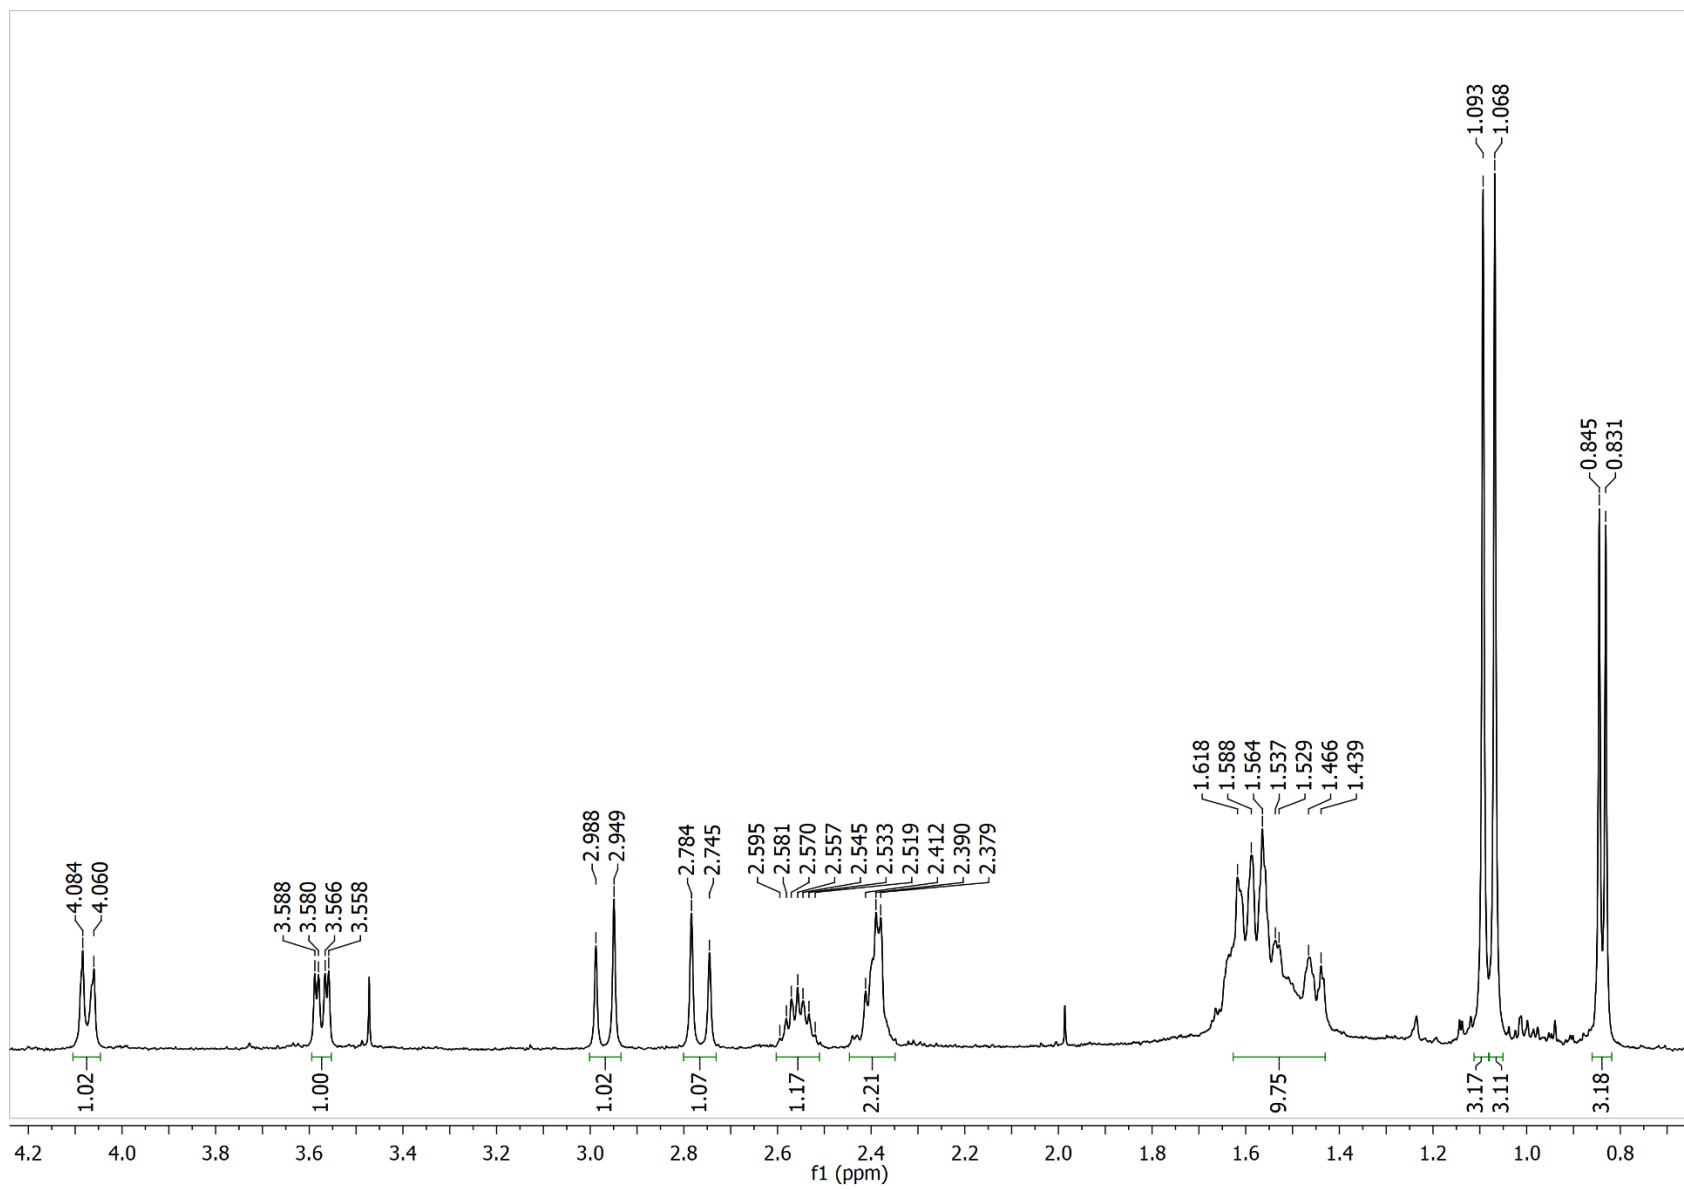



**Figure S21.**  $^{13}\text{C}$  NMR (125 MHz,  $\text{CDCl}_3$ ) spectrum of **2**

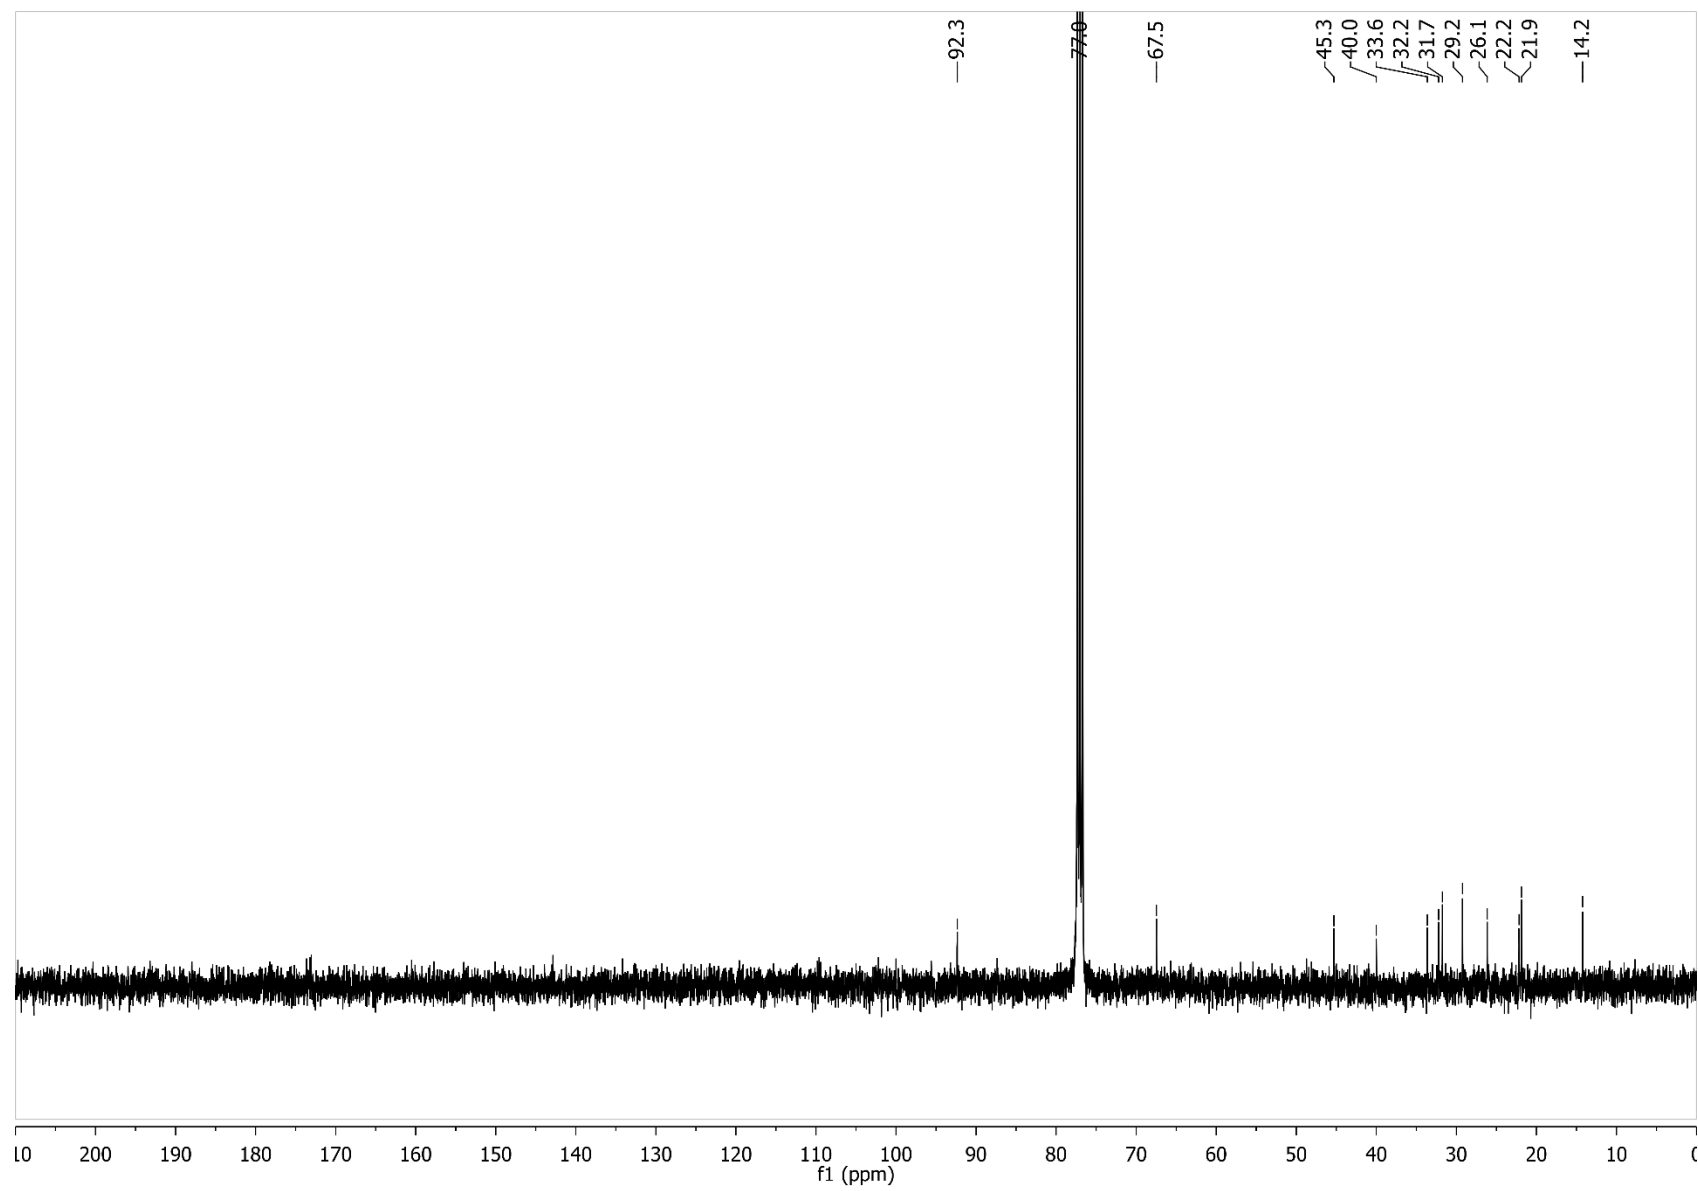

**Figure S22.**  $^{13}\text{C}$  NMR (200 MHz,  $\text{CDCl}_3$ ) spectrum of **2**

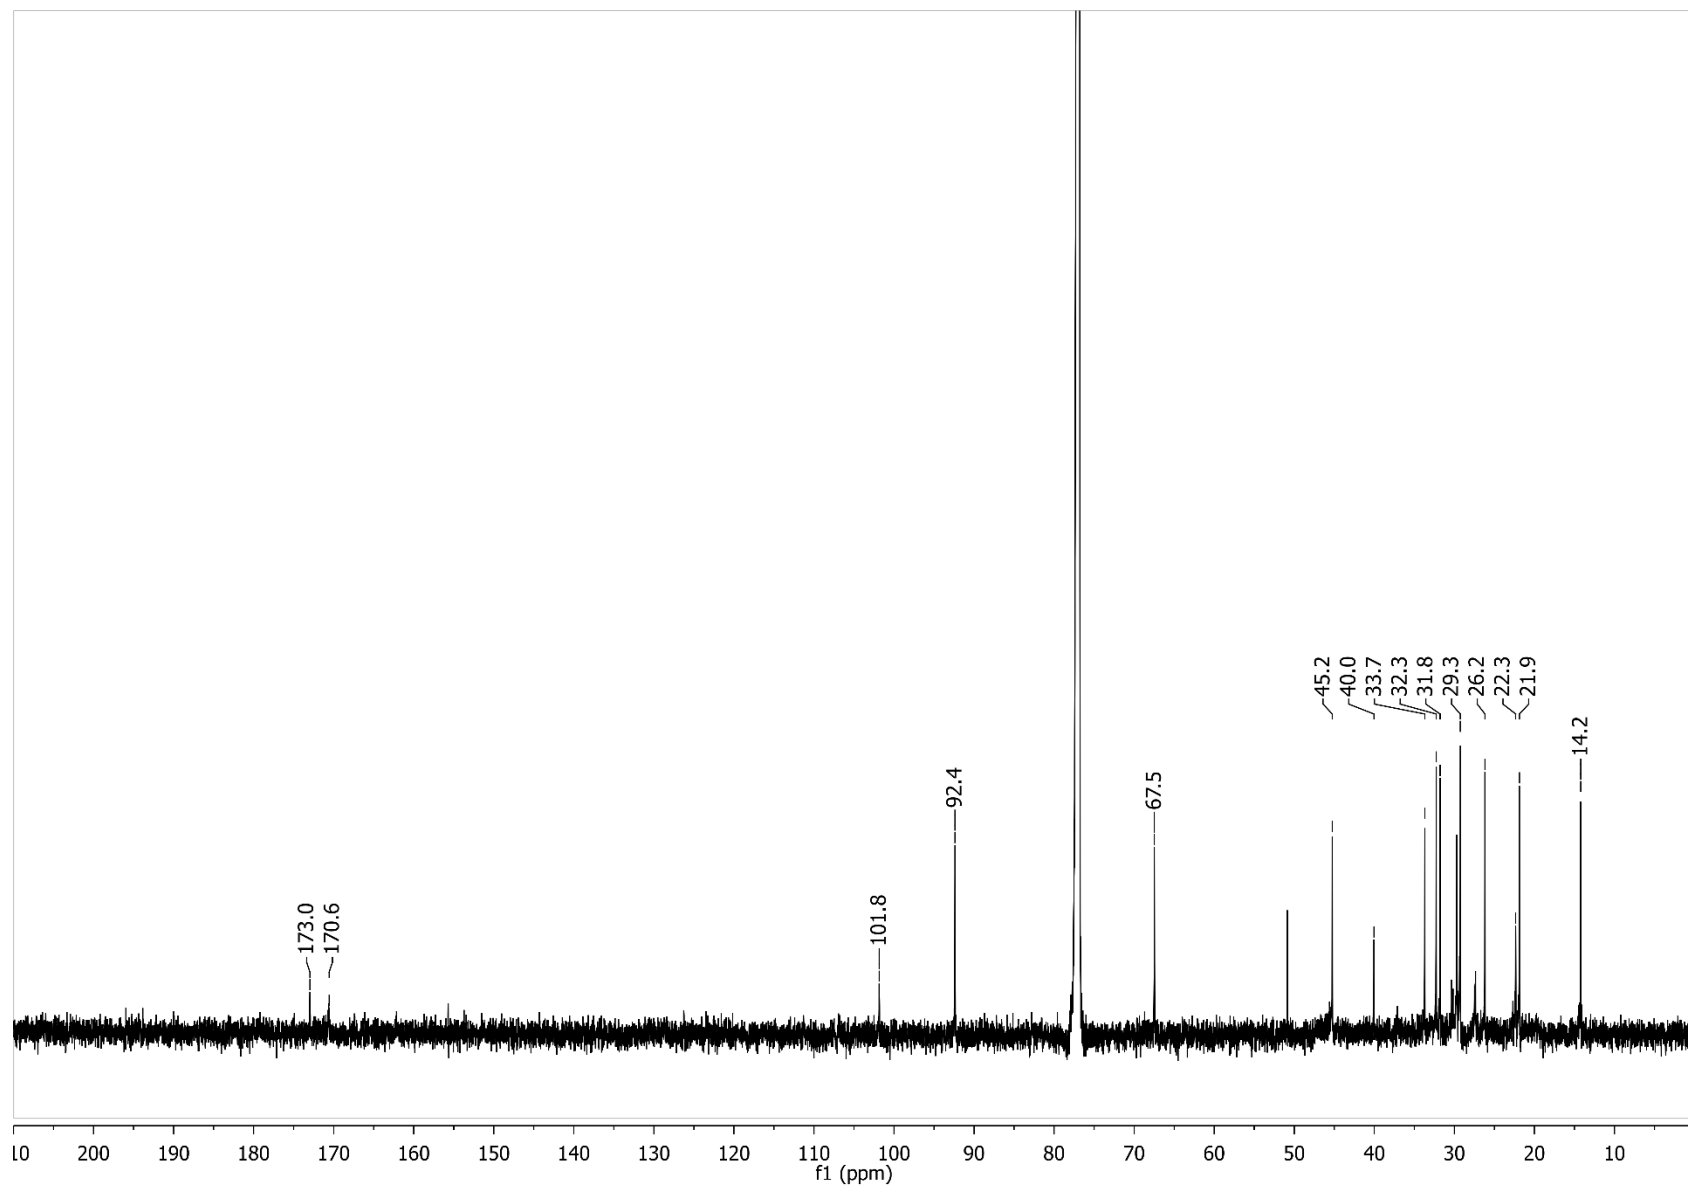

**Figure S23.** HSQC NMR (500 MHz, CDCl<sub>3</sub>) extension spectrum of **2**

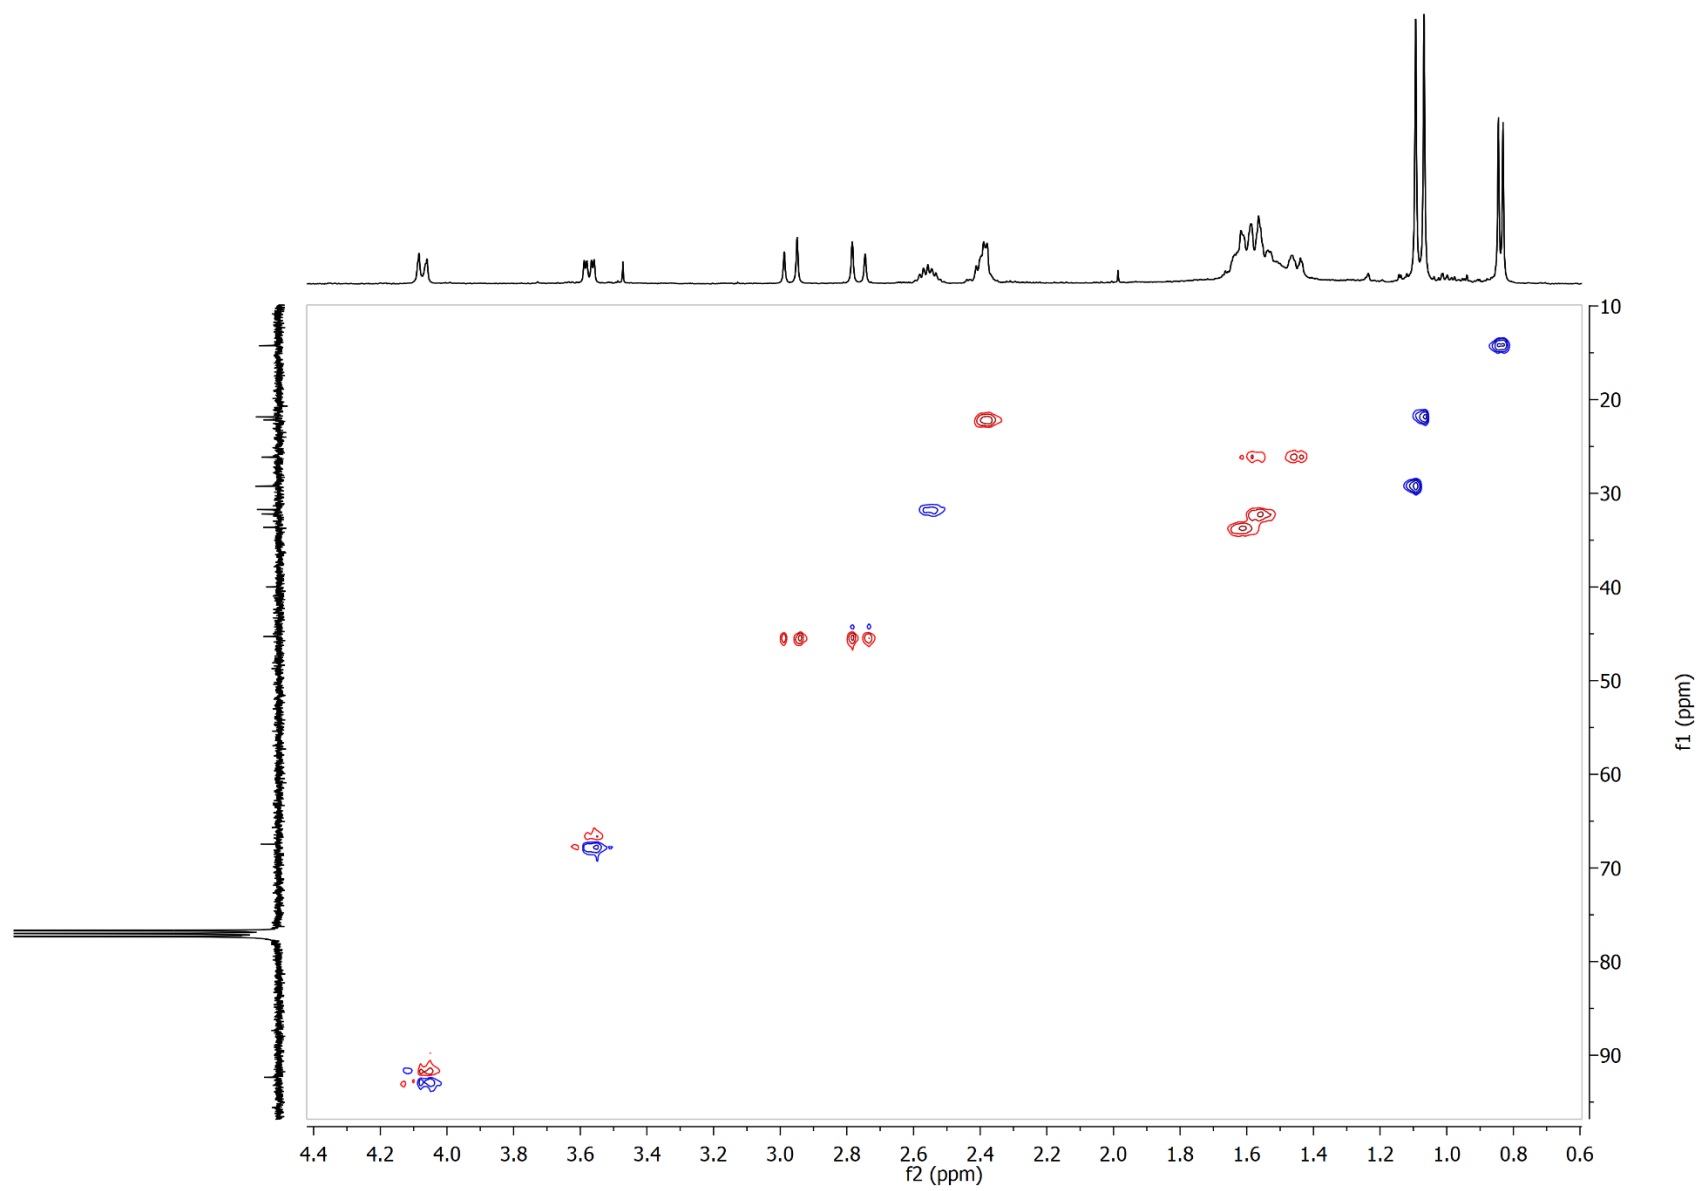

**Figure S24.** HMBC NMR (500 MHz, CDCl<sub>3</sub>) spectrum of **2**

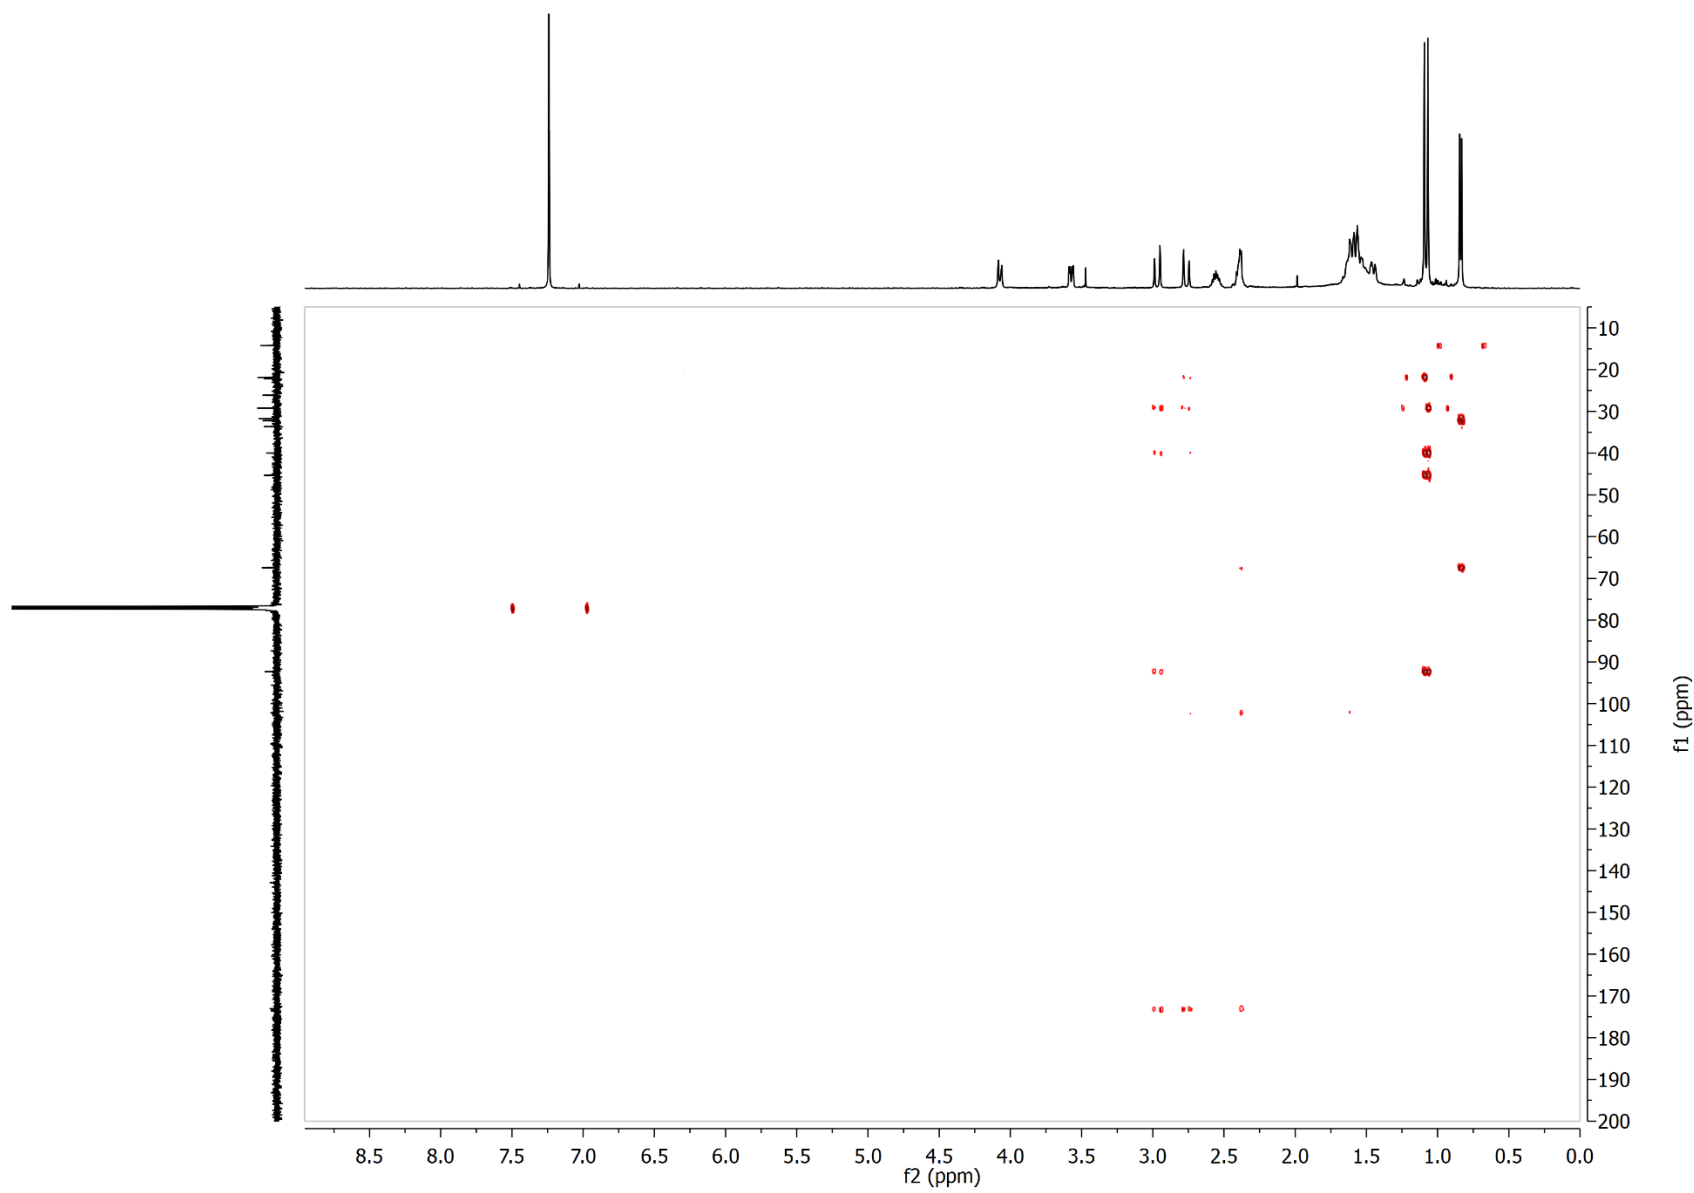

**Figure S25.** HMBC NMR (500 MHz, CDCl<sub>3</sub>) extension spectrum of **2**

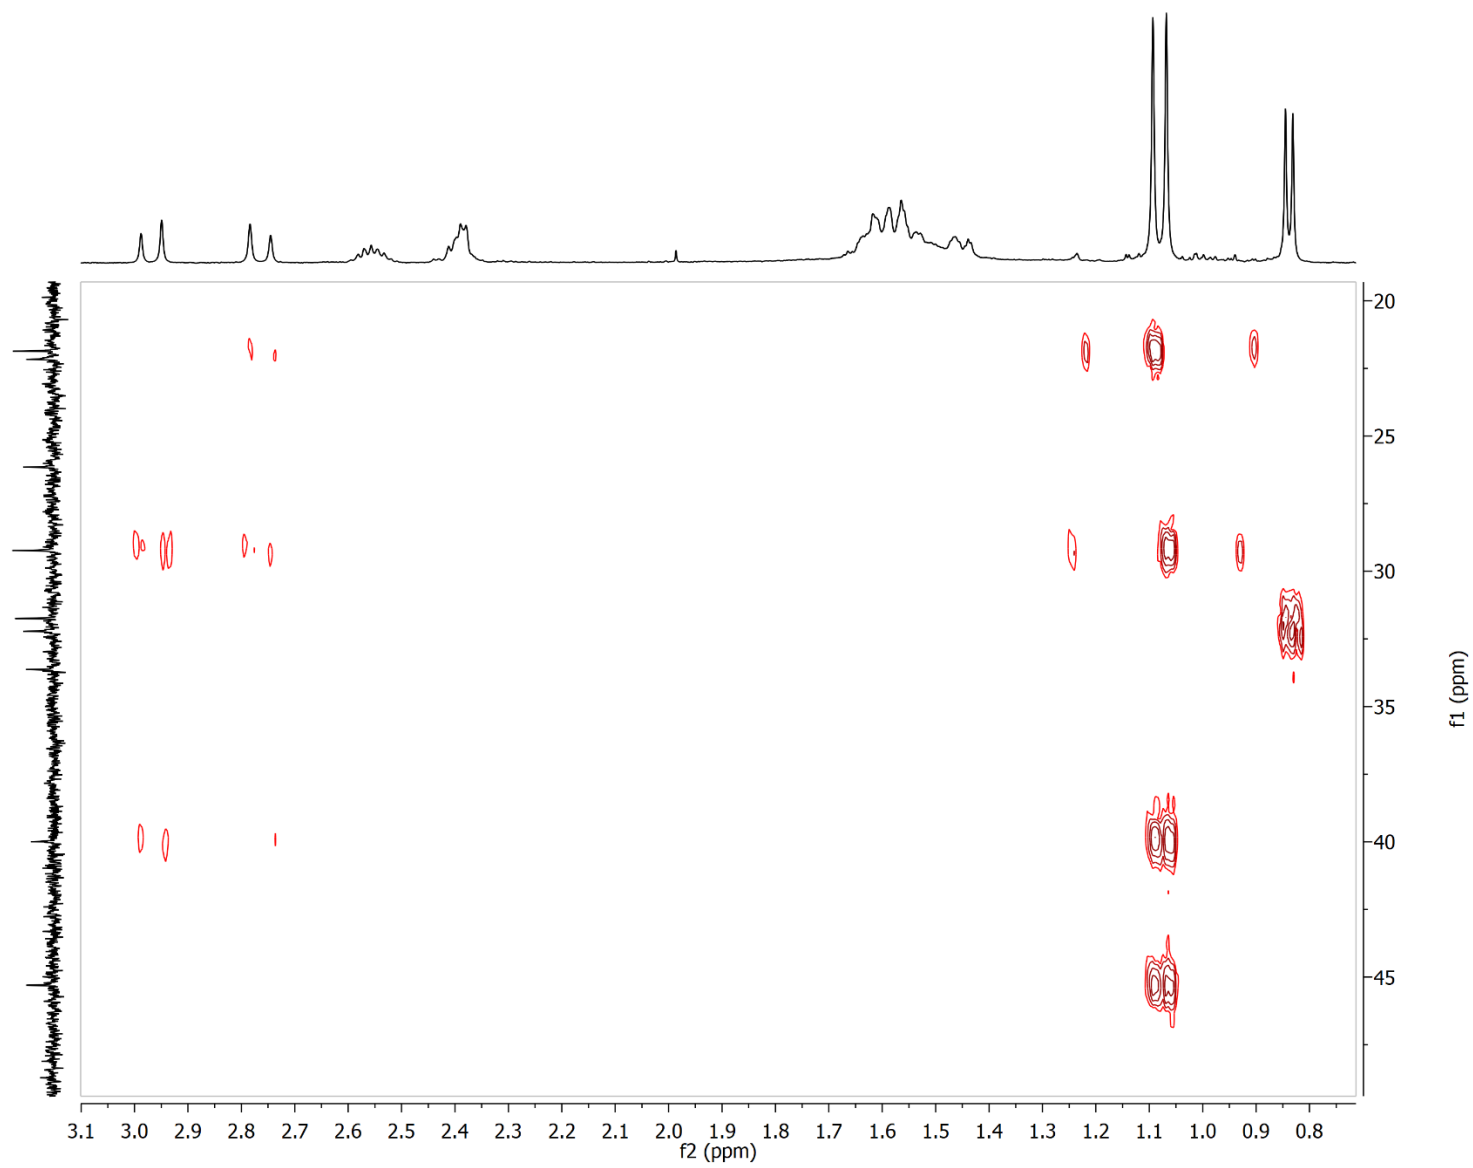

**Figure S26.**  $^1\text{H}$ - $^1\text{H}$  COSY NMR (500 MHz,  $\text{CDCl}_3$ ) spectrum of **2**

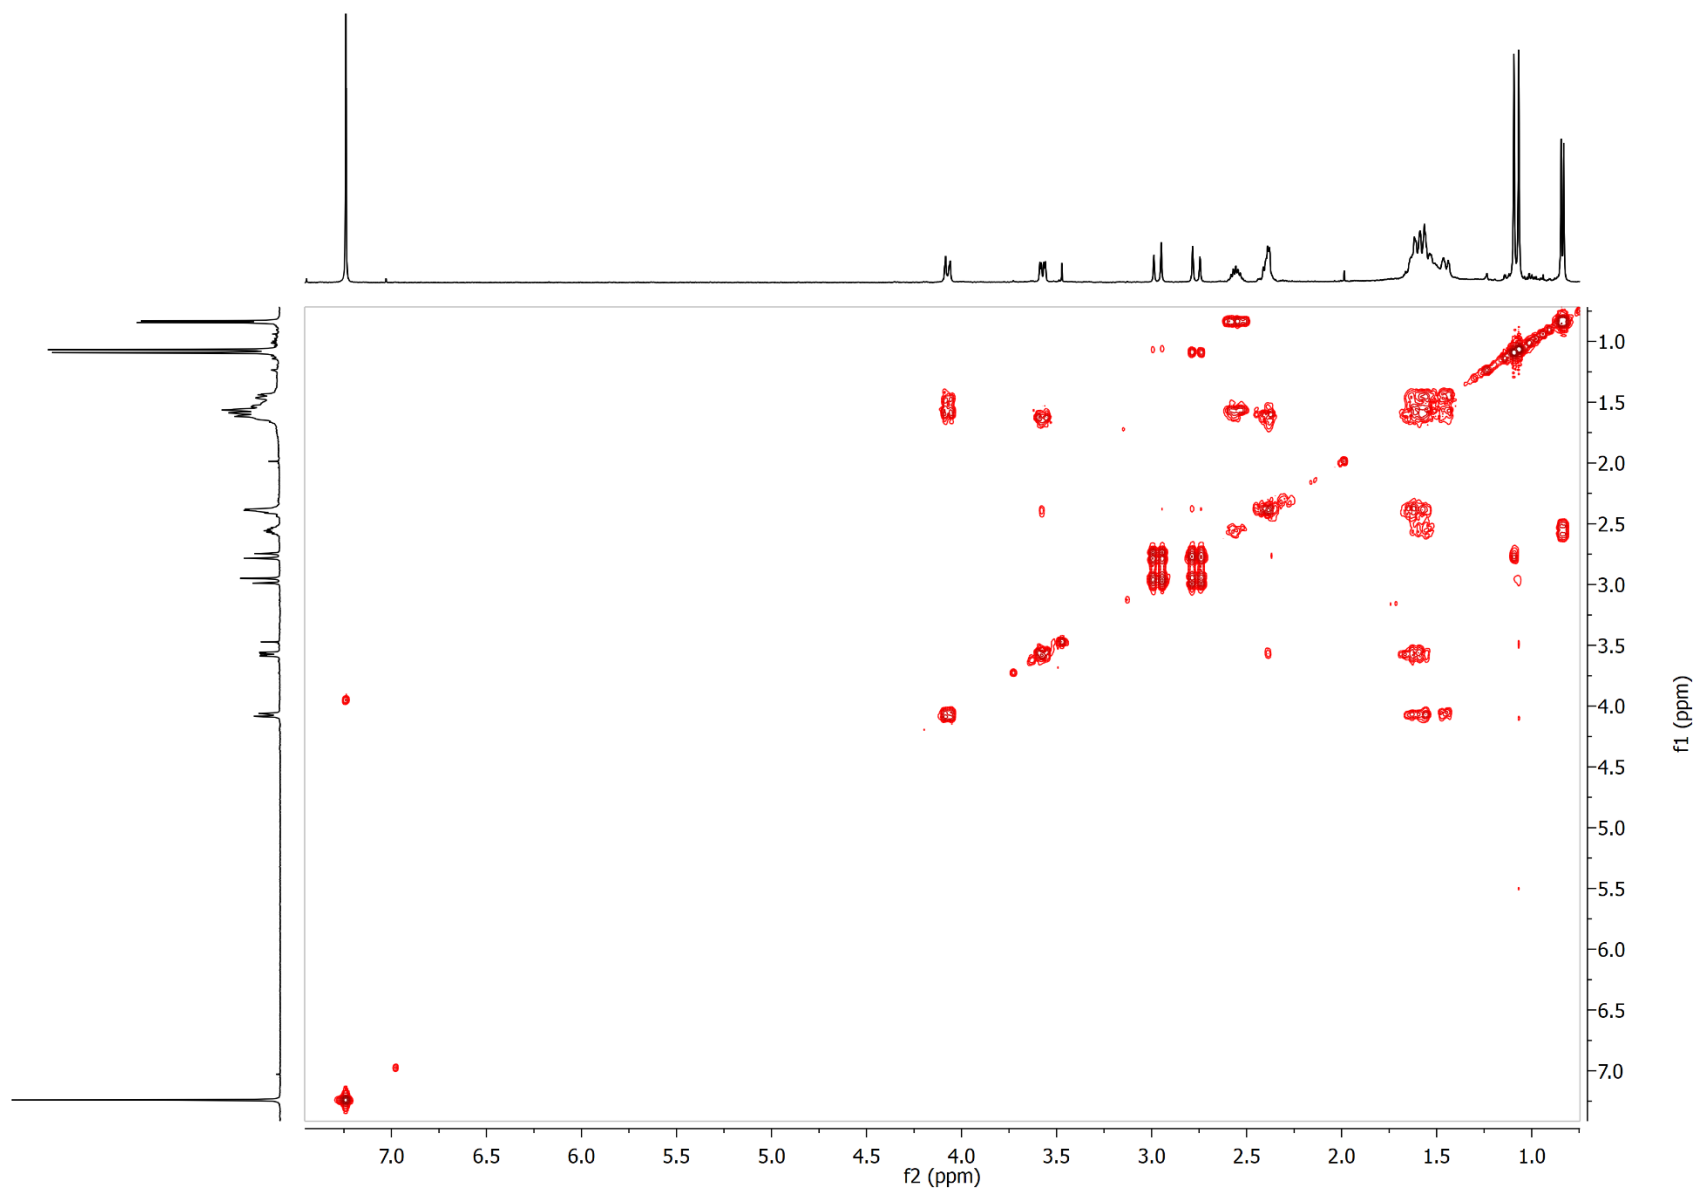

**Figure S27.**  $^1\text{H}$ - $^1\text{H}$  NOESY NMR (500 MHz,  $\text{CDCl}_3$ ) spectrum of **2**

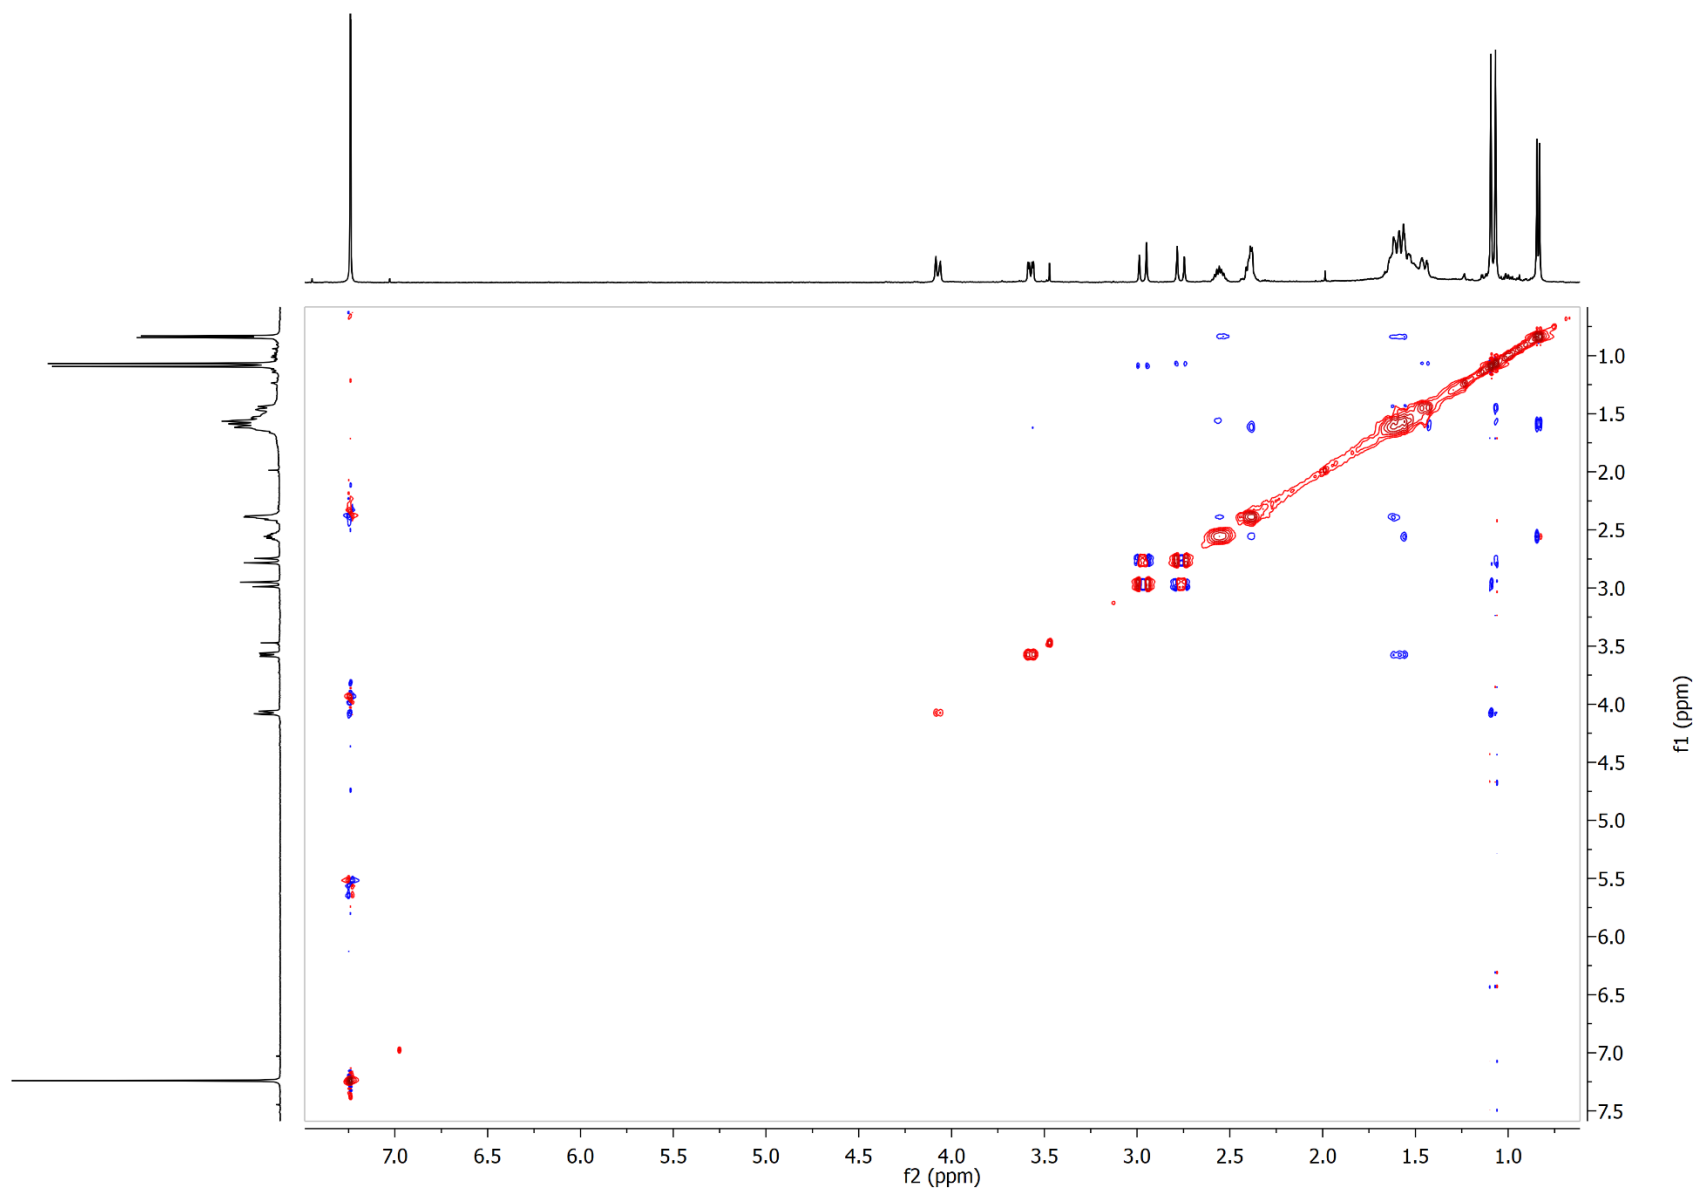

**Figure S28.**  $^1\text{H}$ - $^1\text{H}$  NOESY NMR (500 MHz,  $\text{CDCl}_3$ ) extension spectrum of **2**

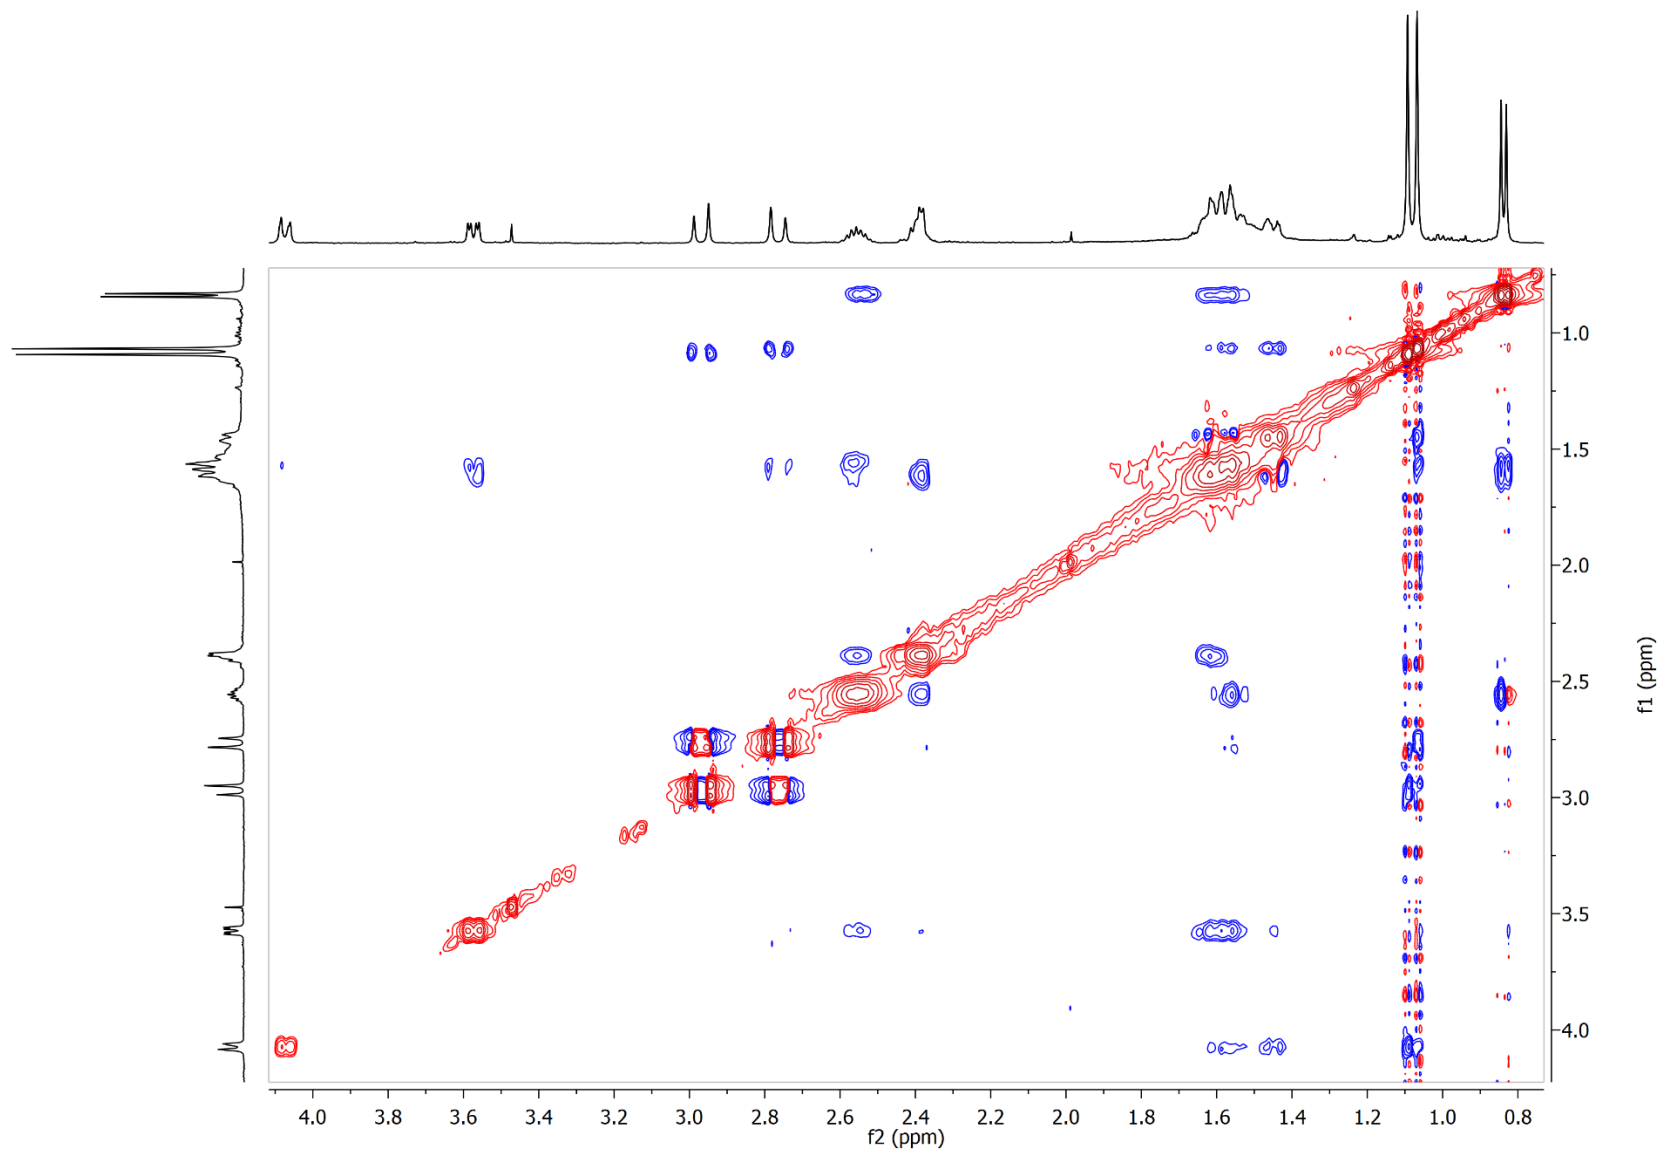



**Figure S29.** ESIMS/MS spectrum of compound **2** ( $[M + H]$ , positive ion mode)

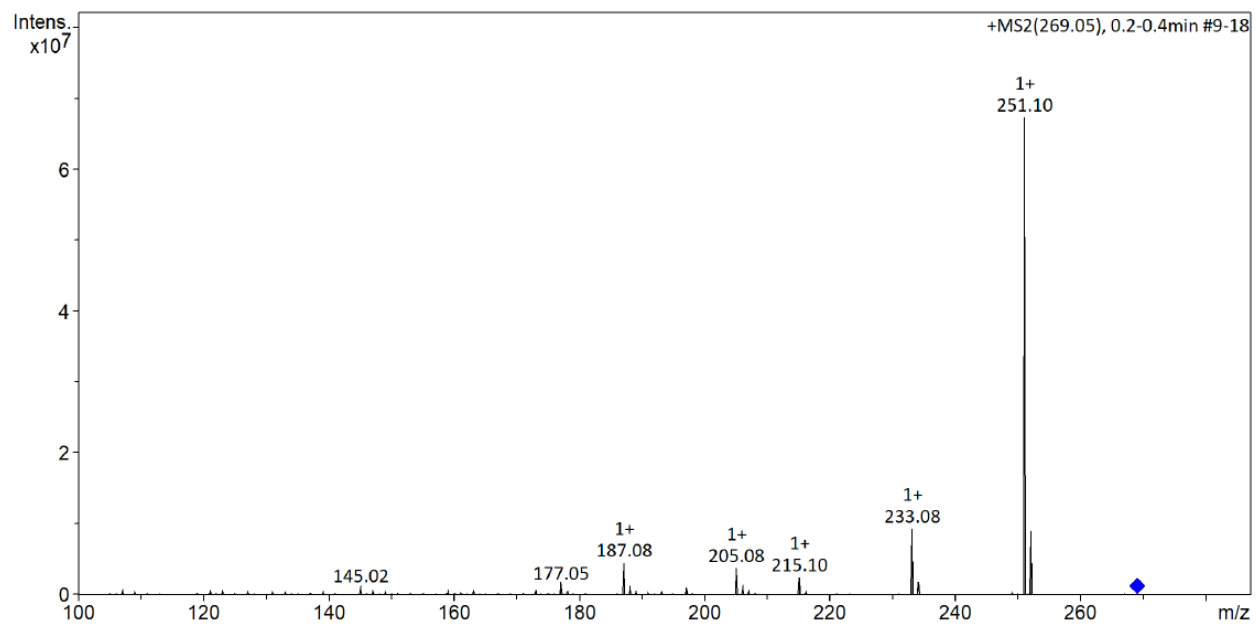

**Figure S30.** IR spectrum of compound **3**

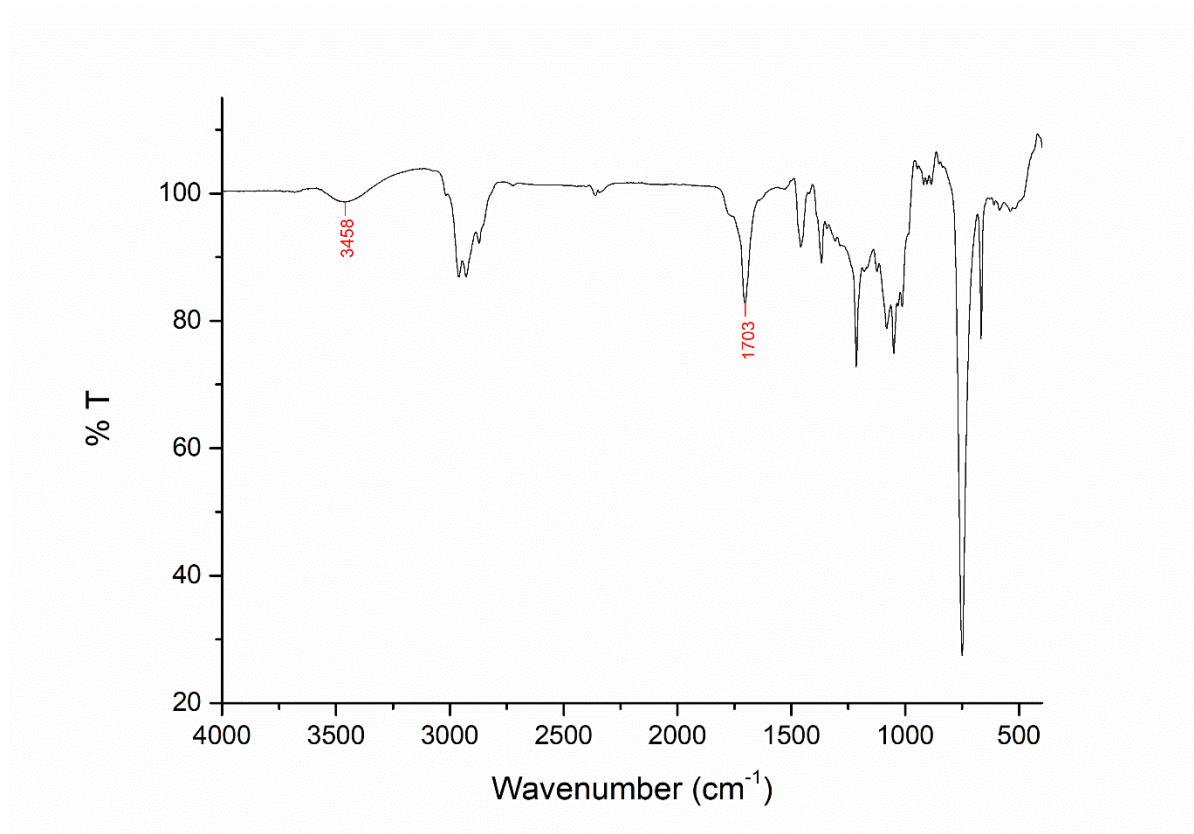

**Figure S31.** HRESIMS spectrum of compound **3** ([M + Na], positive ion mode)

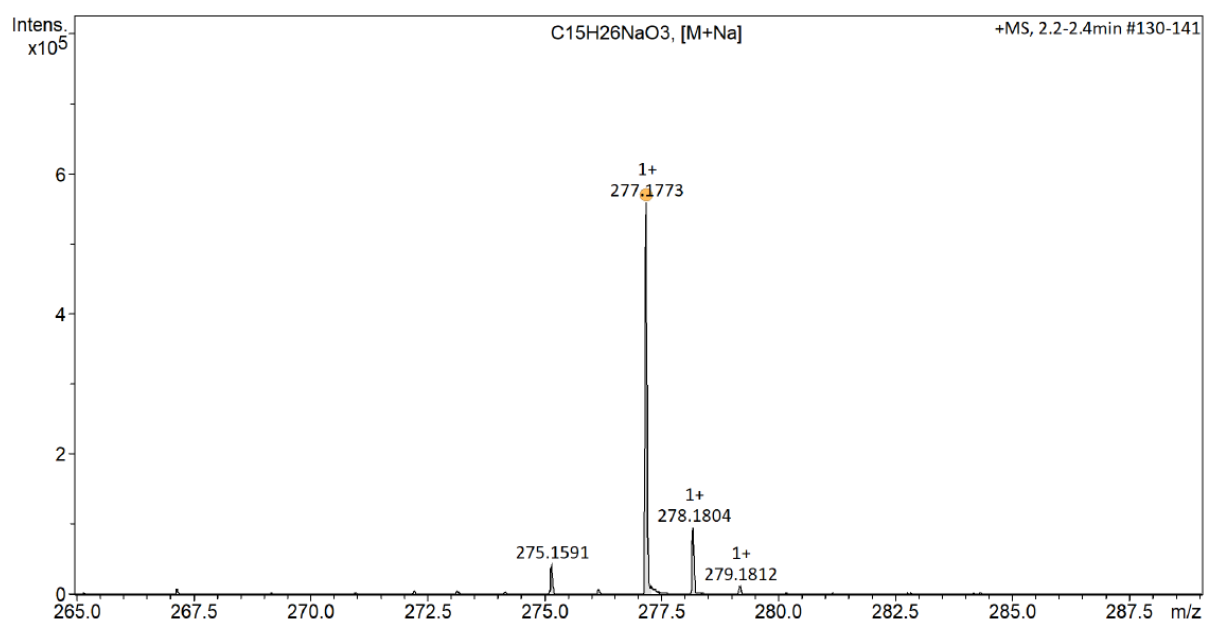

Figure S32.  $^1\text{H}$  NMR (400 MHz,  $\text{CDCl}_3$ ) spectrum of **3**

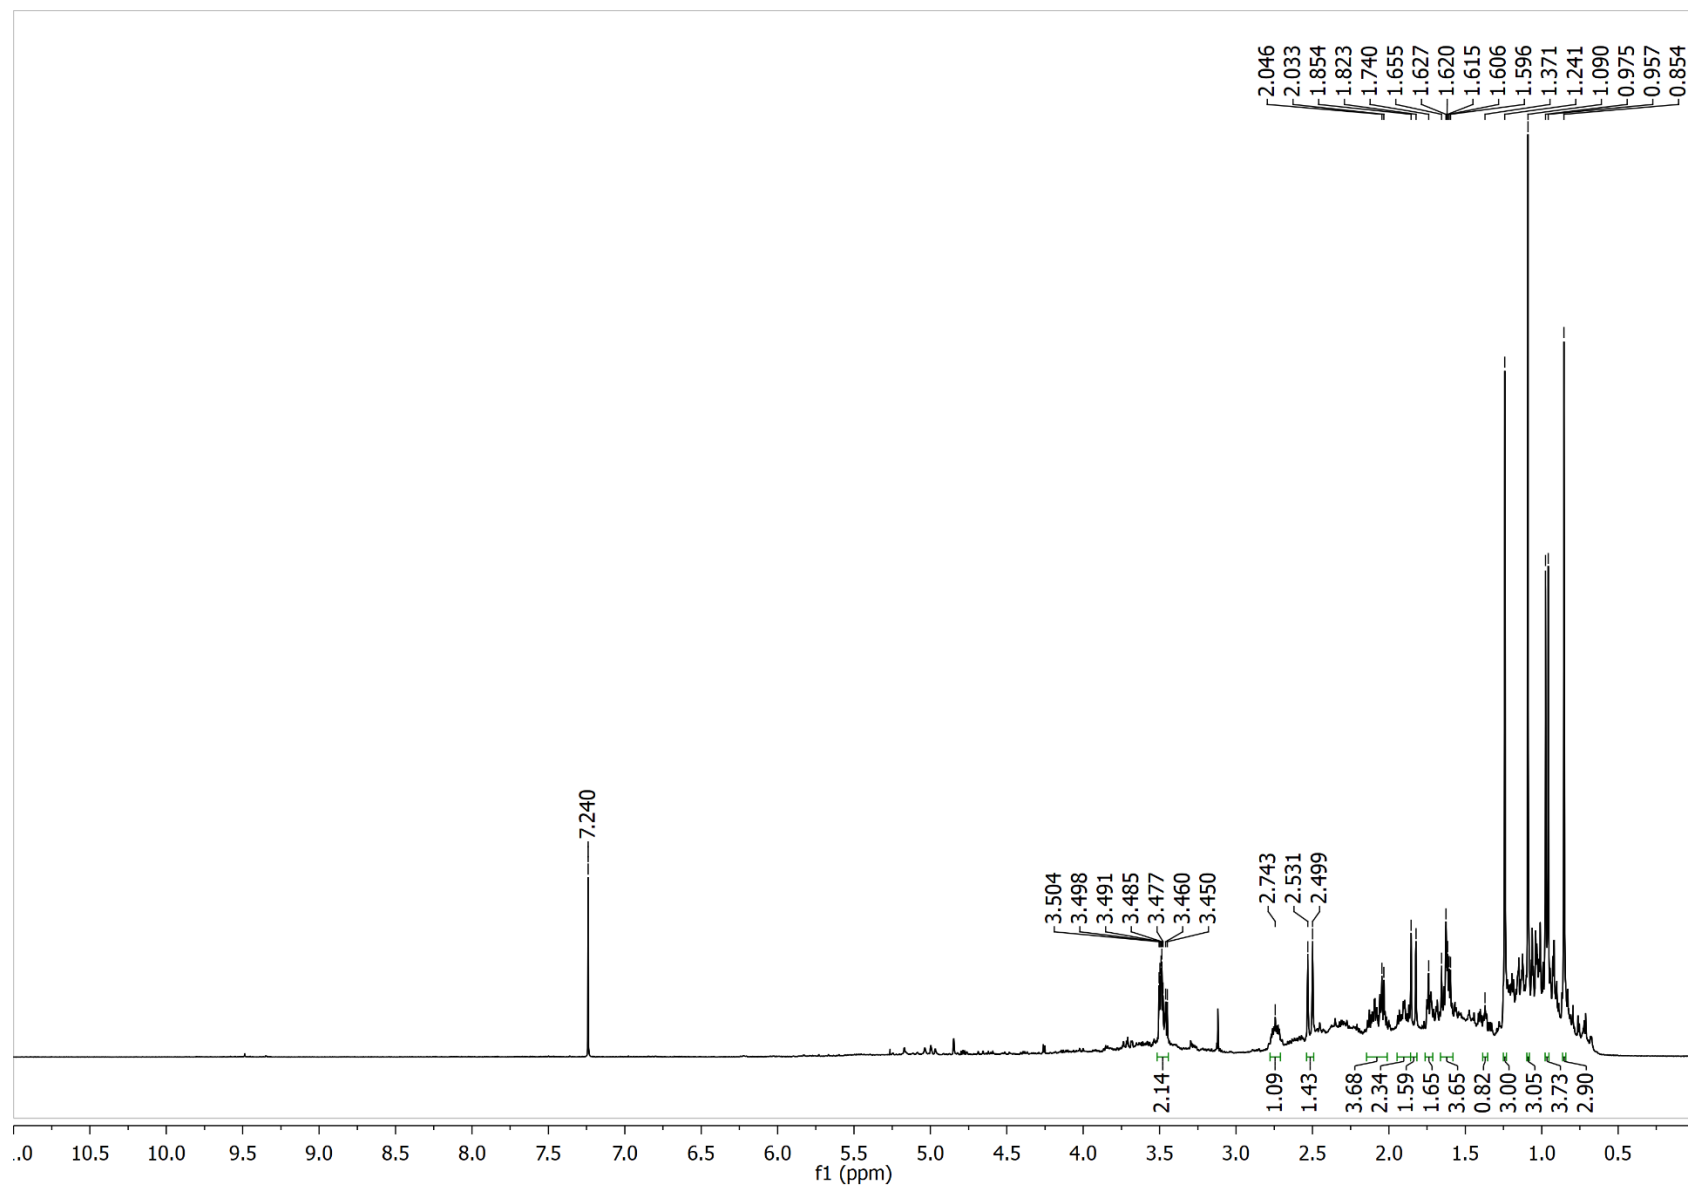

**Figure S33.**  $^1\text{H}$  NMR (400 MHz,  $\text{CDCl}_3$ ) extension spectrum of **3**

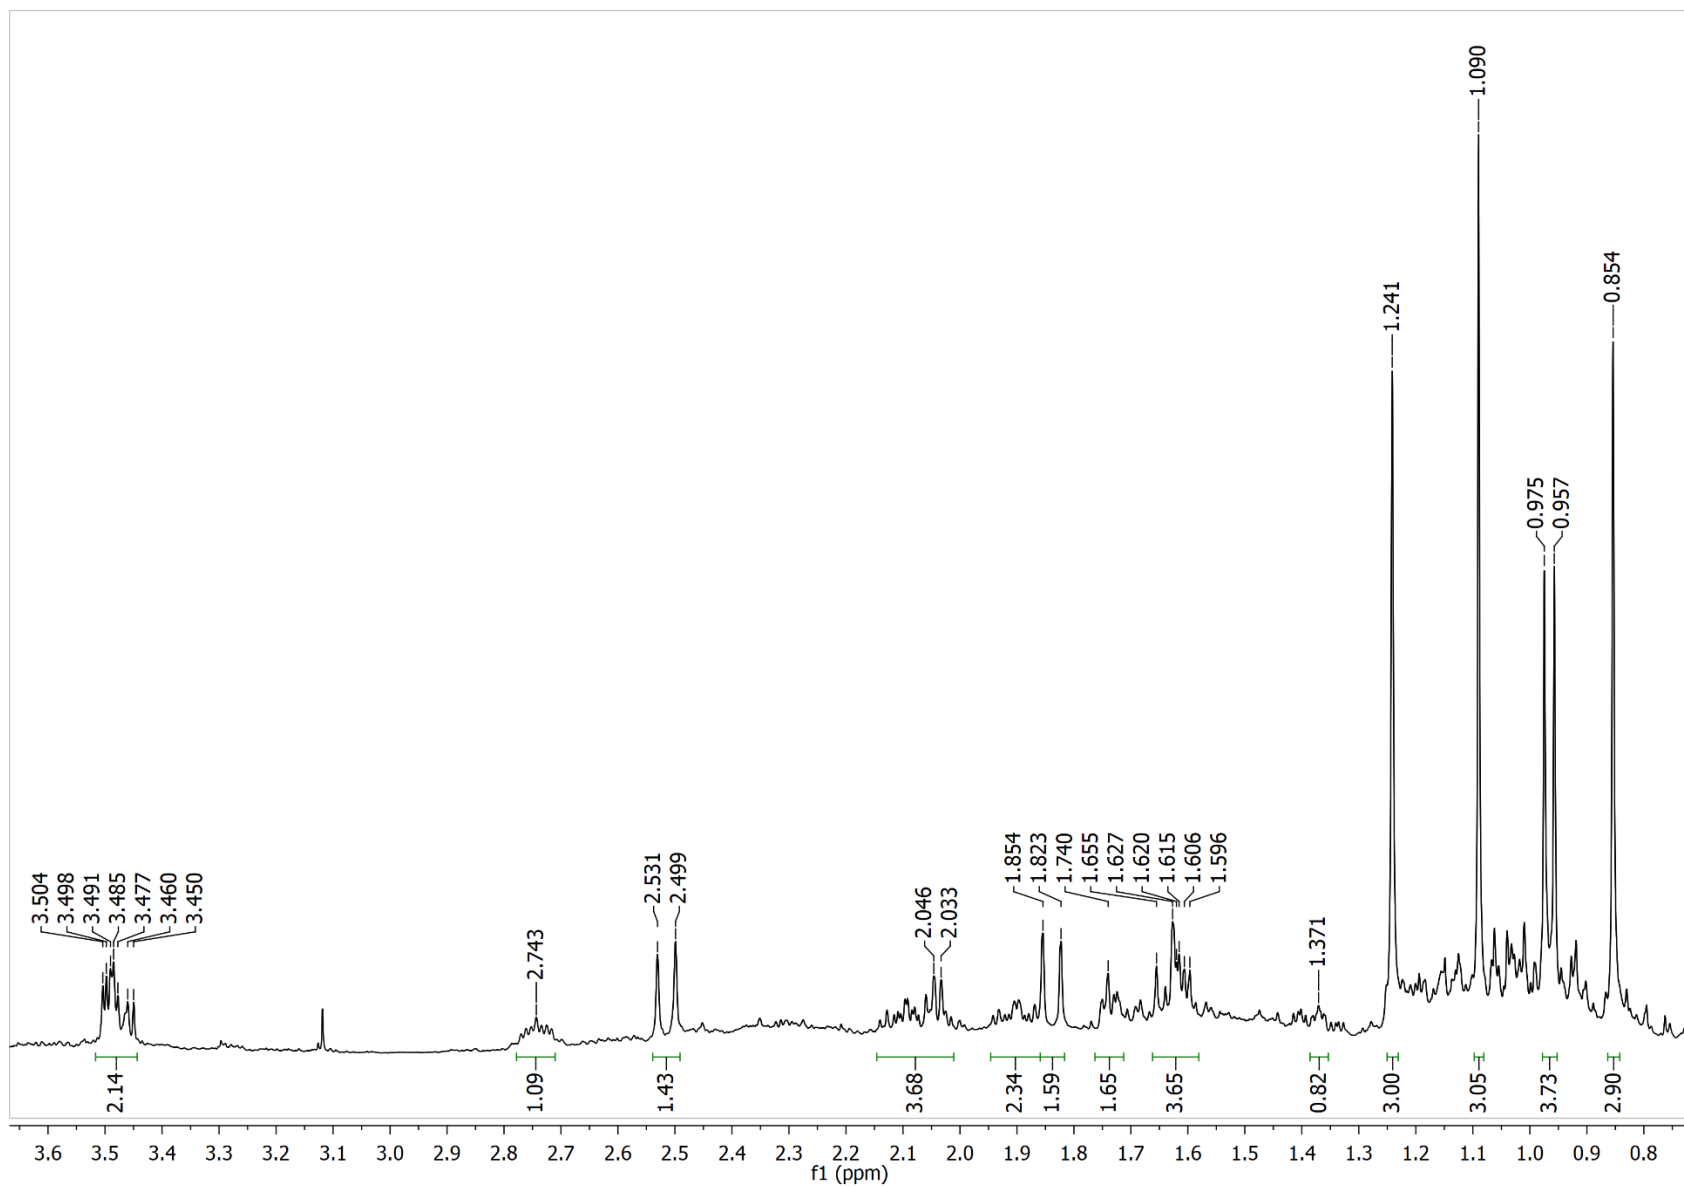

**Figure S34.**  $^{13}\text{C}$  NMR (100 MHz,  $\text{CDCl}_3$ ) spectrum of **3**

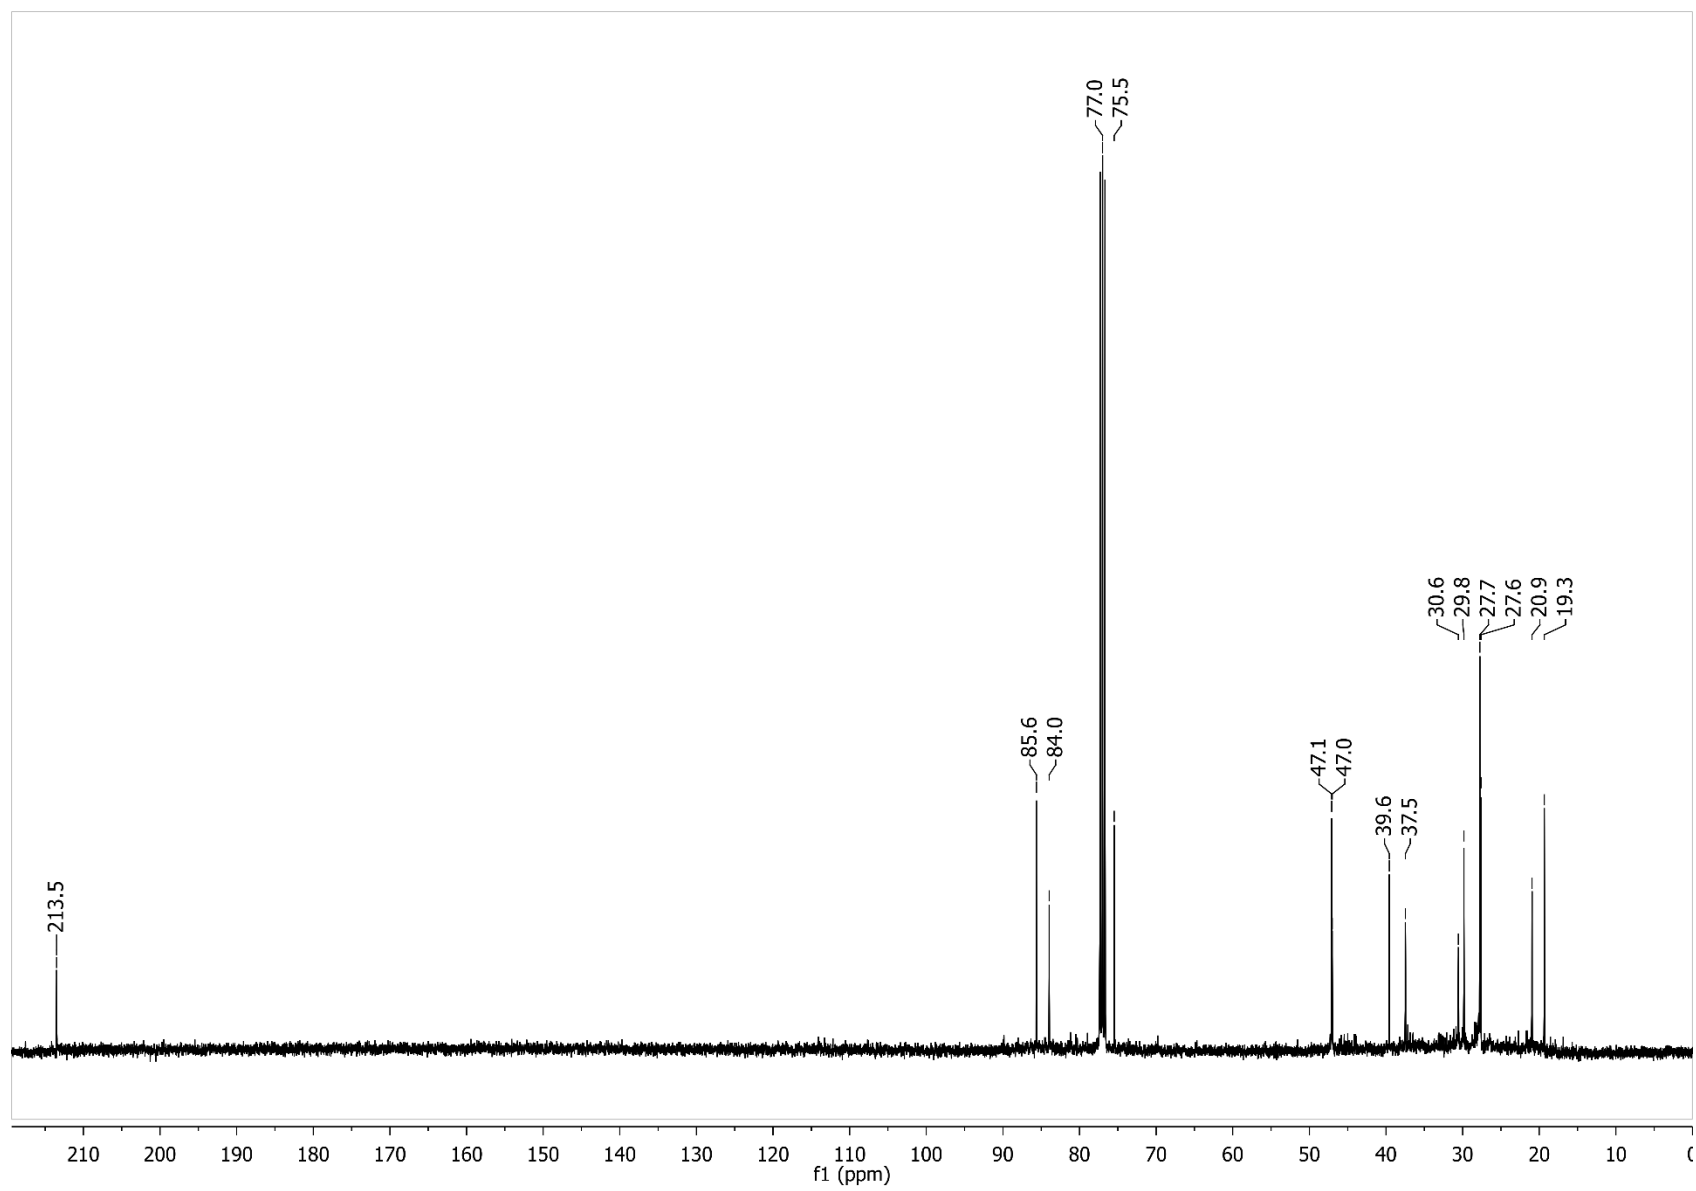

**Figure S35.**  $^{13}\text{C}$  DEPT-135 NMR (100 MHz,  $\text{CDCl}_3$ ) spectrum of **3**

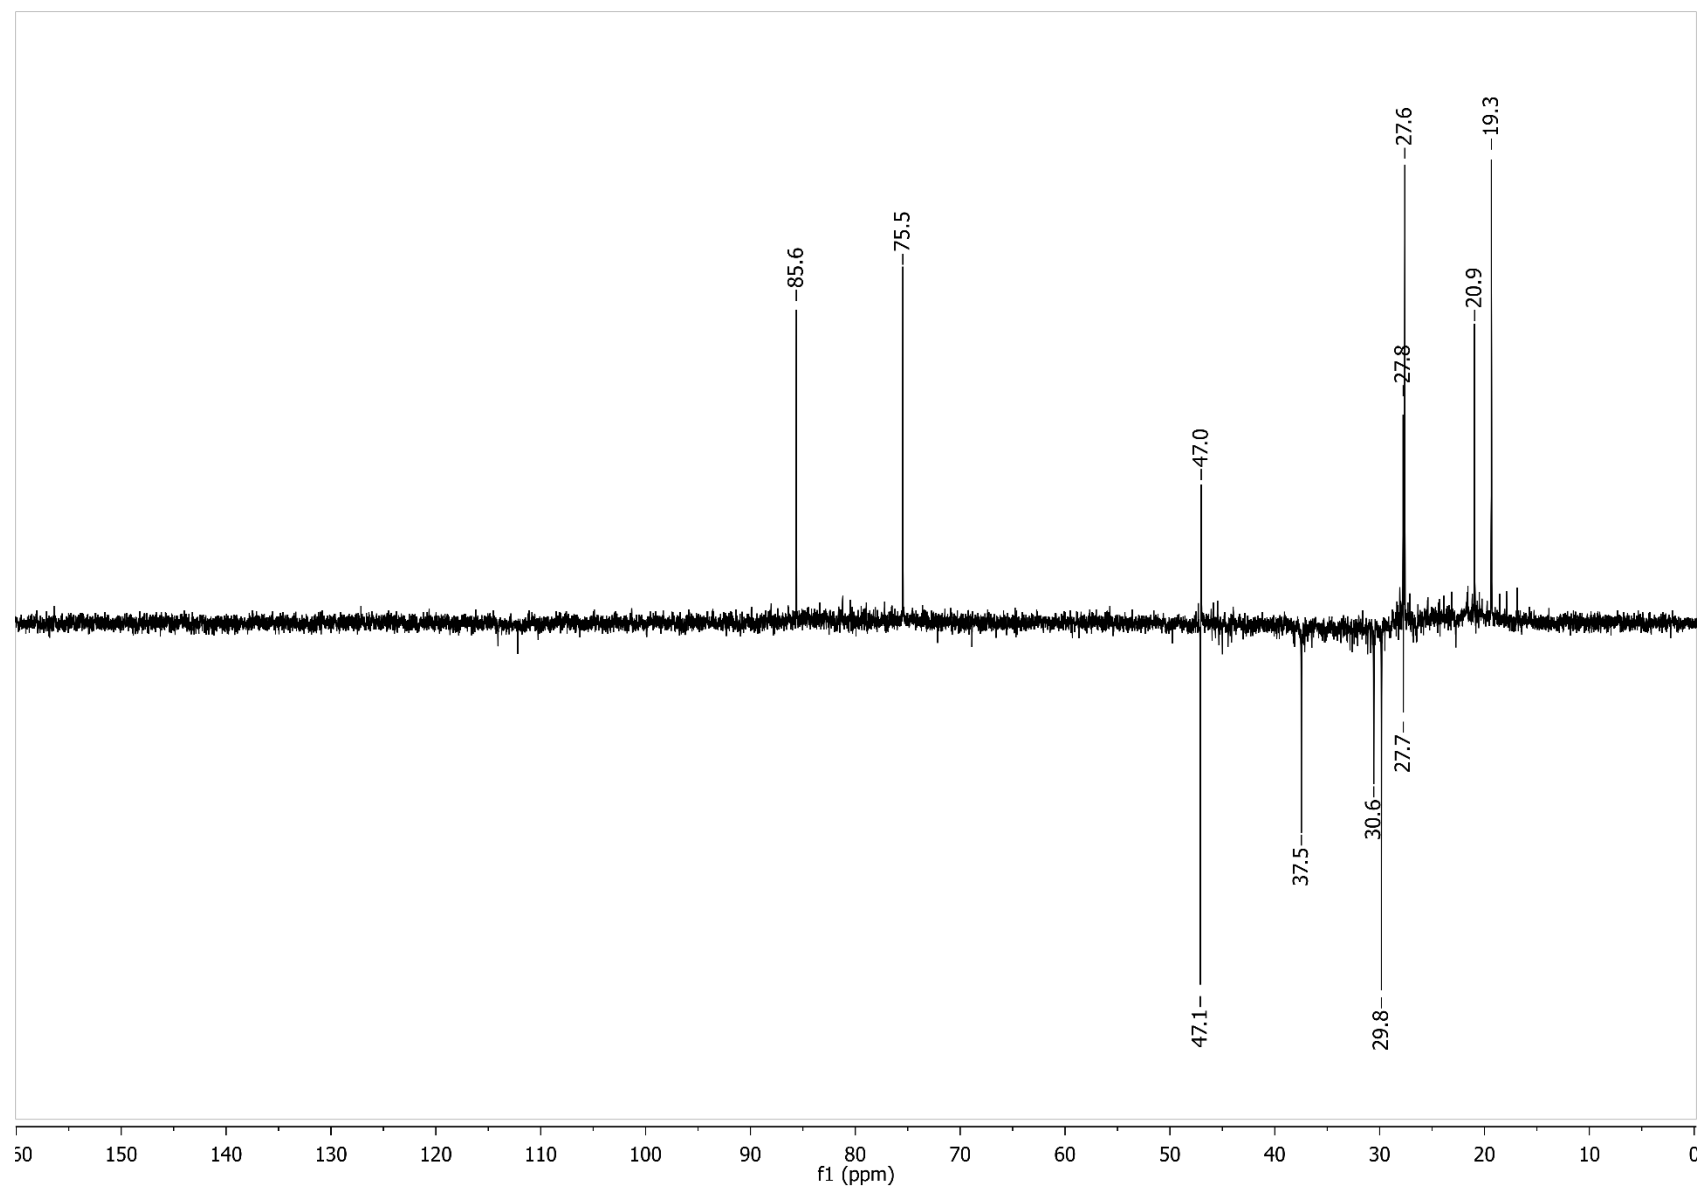

**Figure S36.** HSQC NMR (400 MHz, CDCl<sub>3</sub>) spectrum of **3**

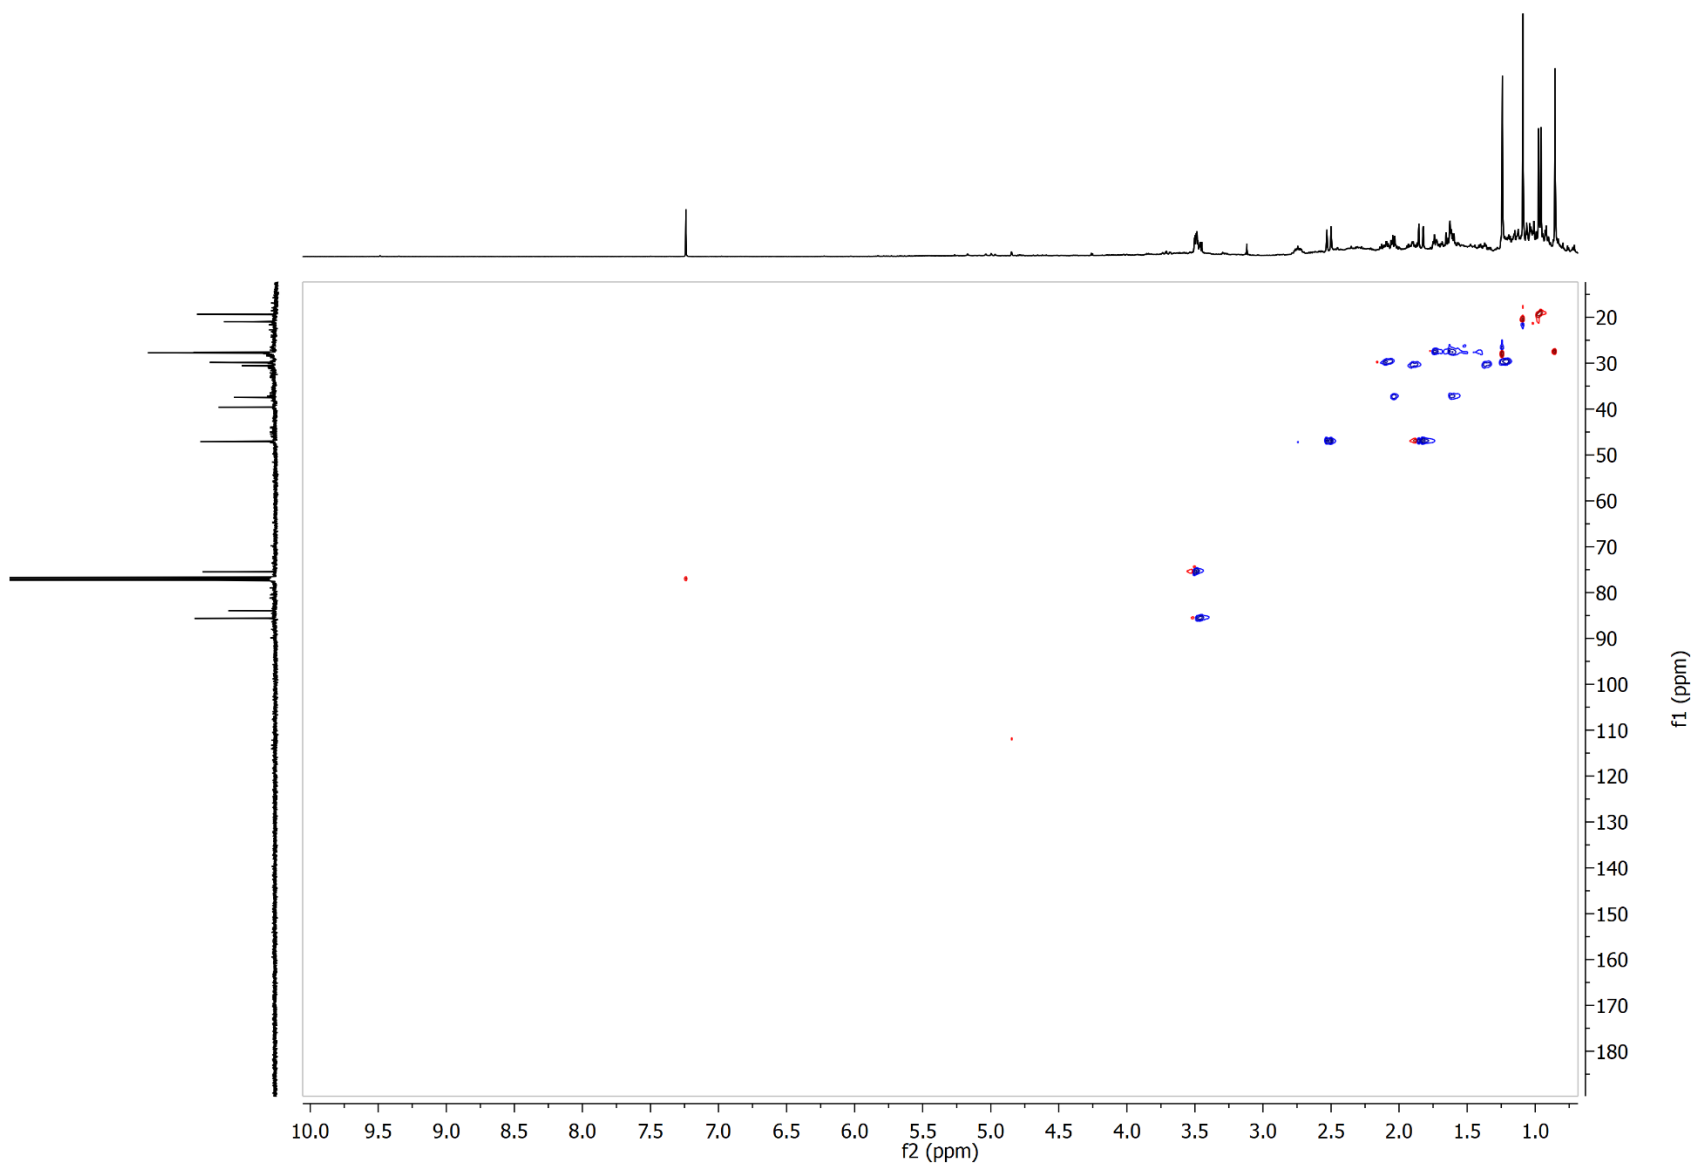

**Figure S37.** HSQC NMR (400 MHz, CDCl<sub>3</sub>) extension spectrum of **3**

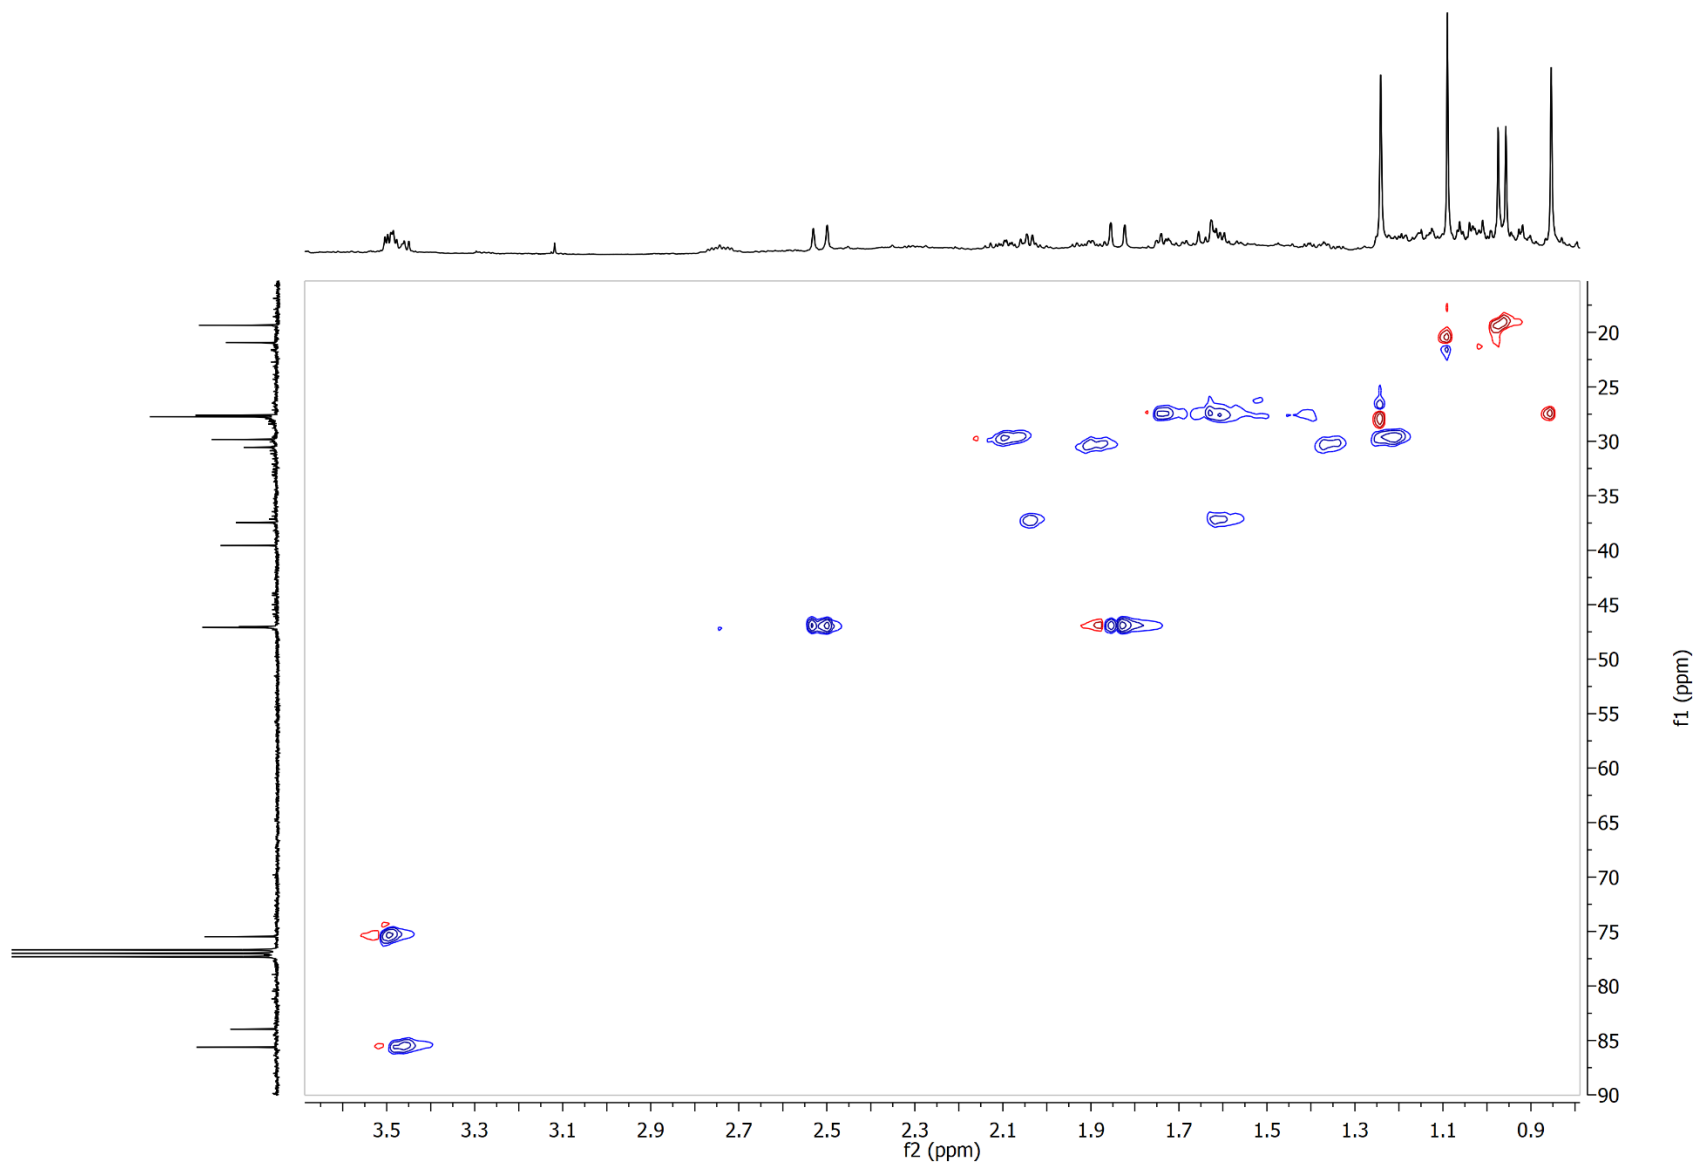



**Figure S38.** HMBC NMR (400 MHz, CDCl<sub>3</sub>) spectrum of **3**

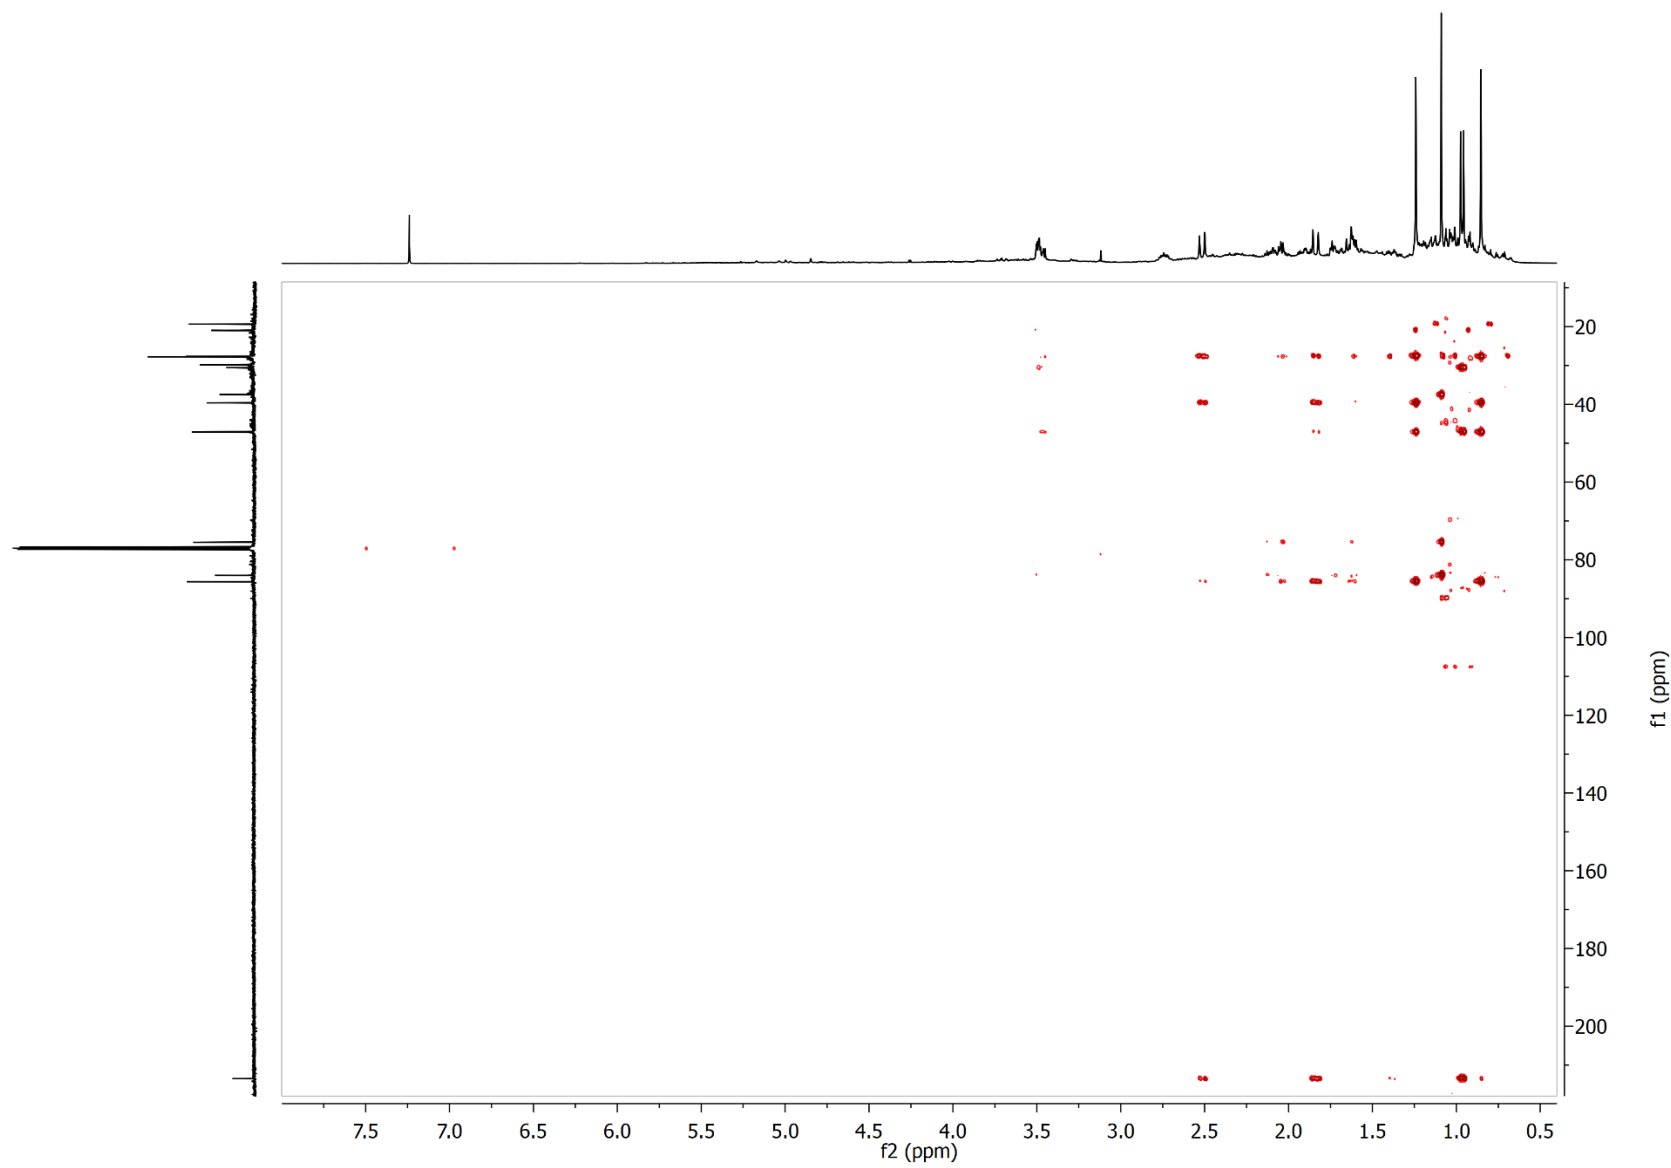

**Figure S39.** HMBC NMR (400 MHz, CDCl<sub>3</sub>) extension spectrum of **3**

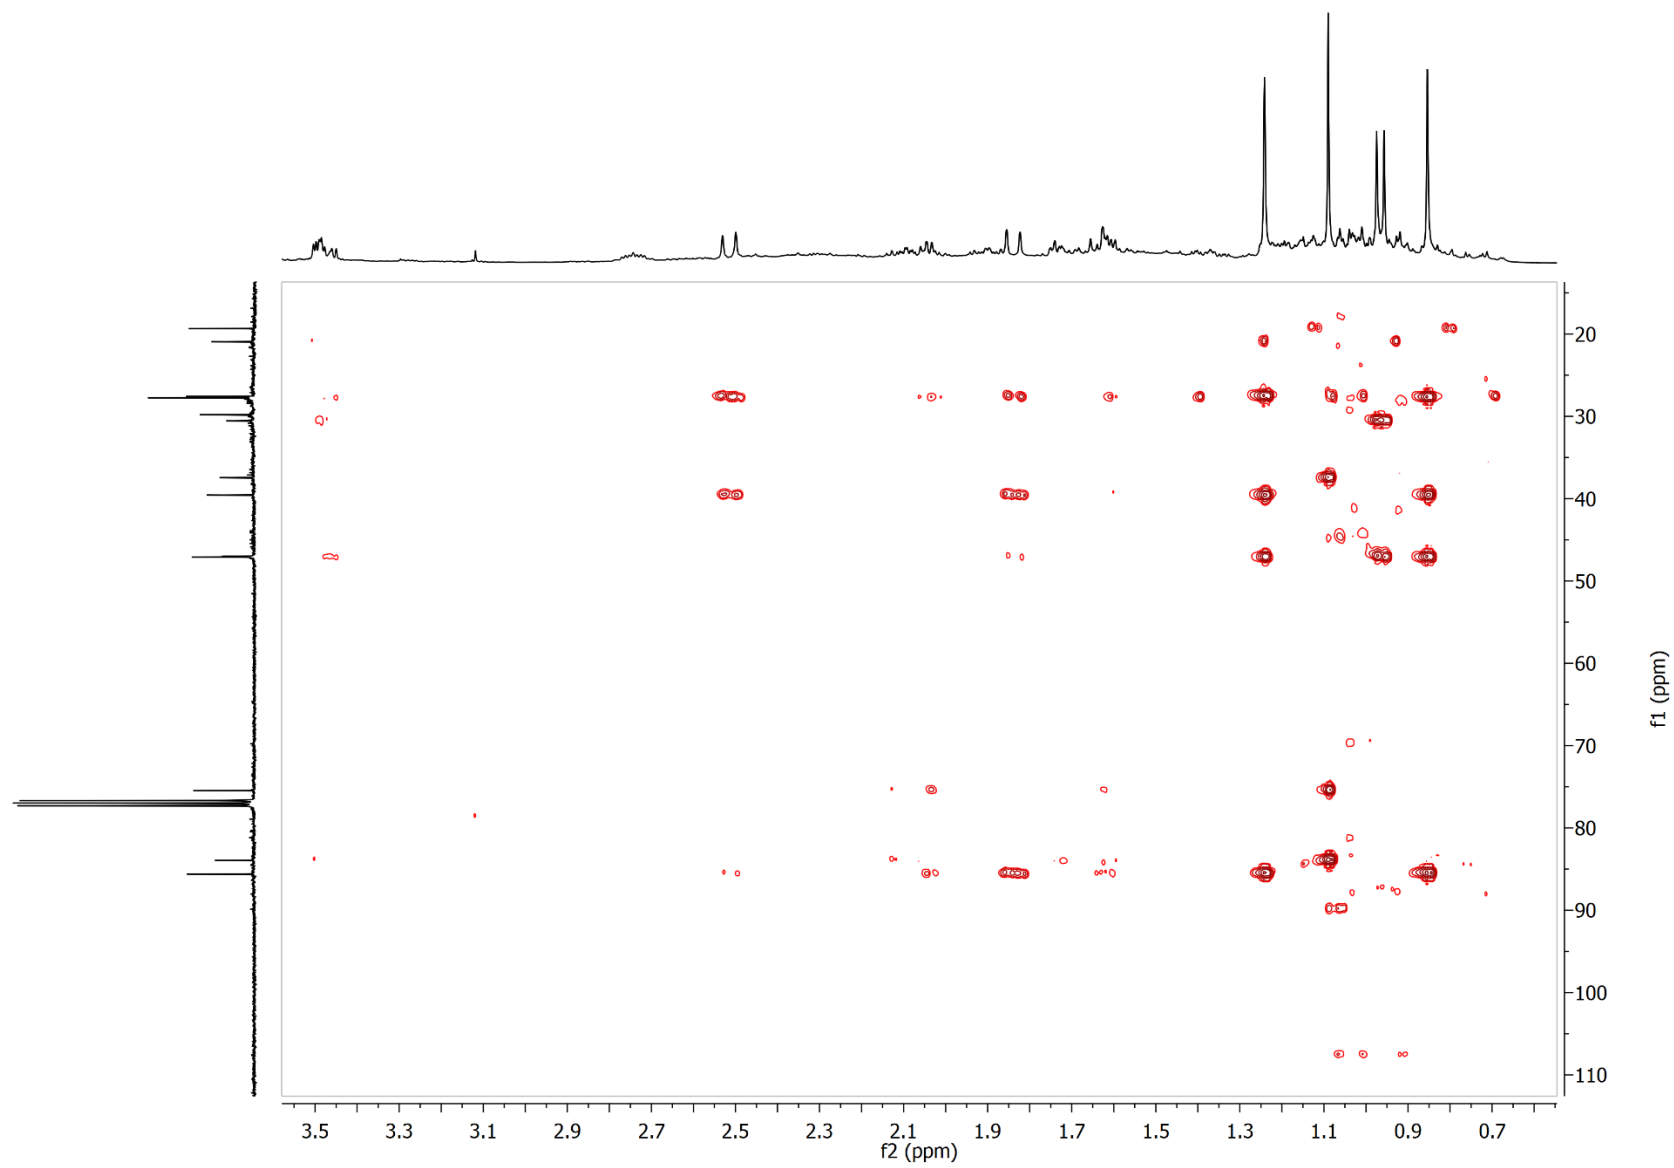

**Figure S40.** HMBC NMR (400 MHz, CDCl<sub>3</sub>) extension spectrum of **3**

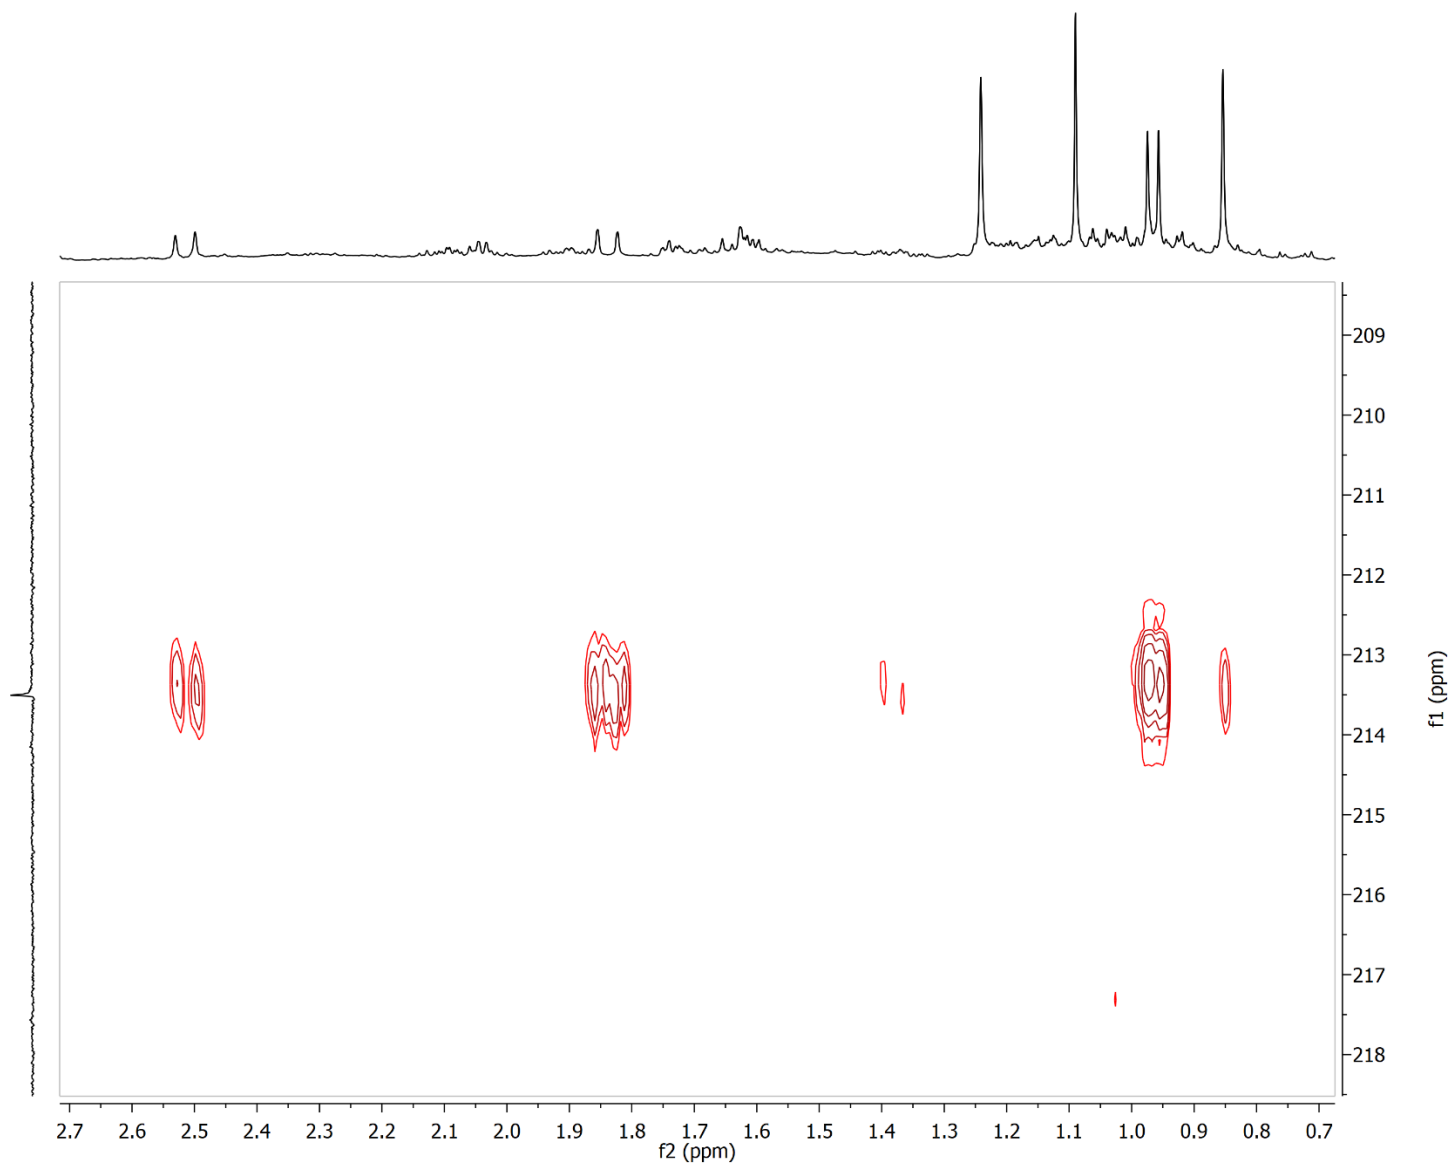

**Figure S41.**  $^1\text{H}$ - $^1\text{H}$  COSY NMR (400 MHz,  $\text{CDCl}_3$ ) spectrum of **3**

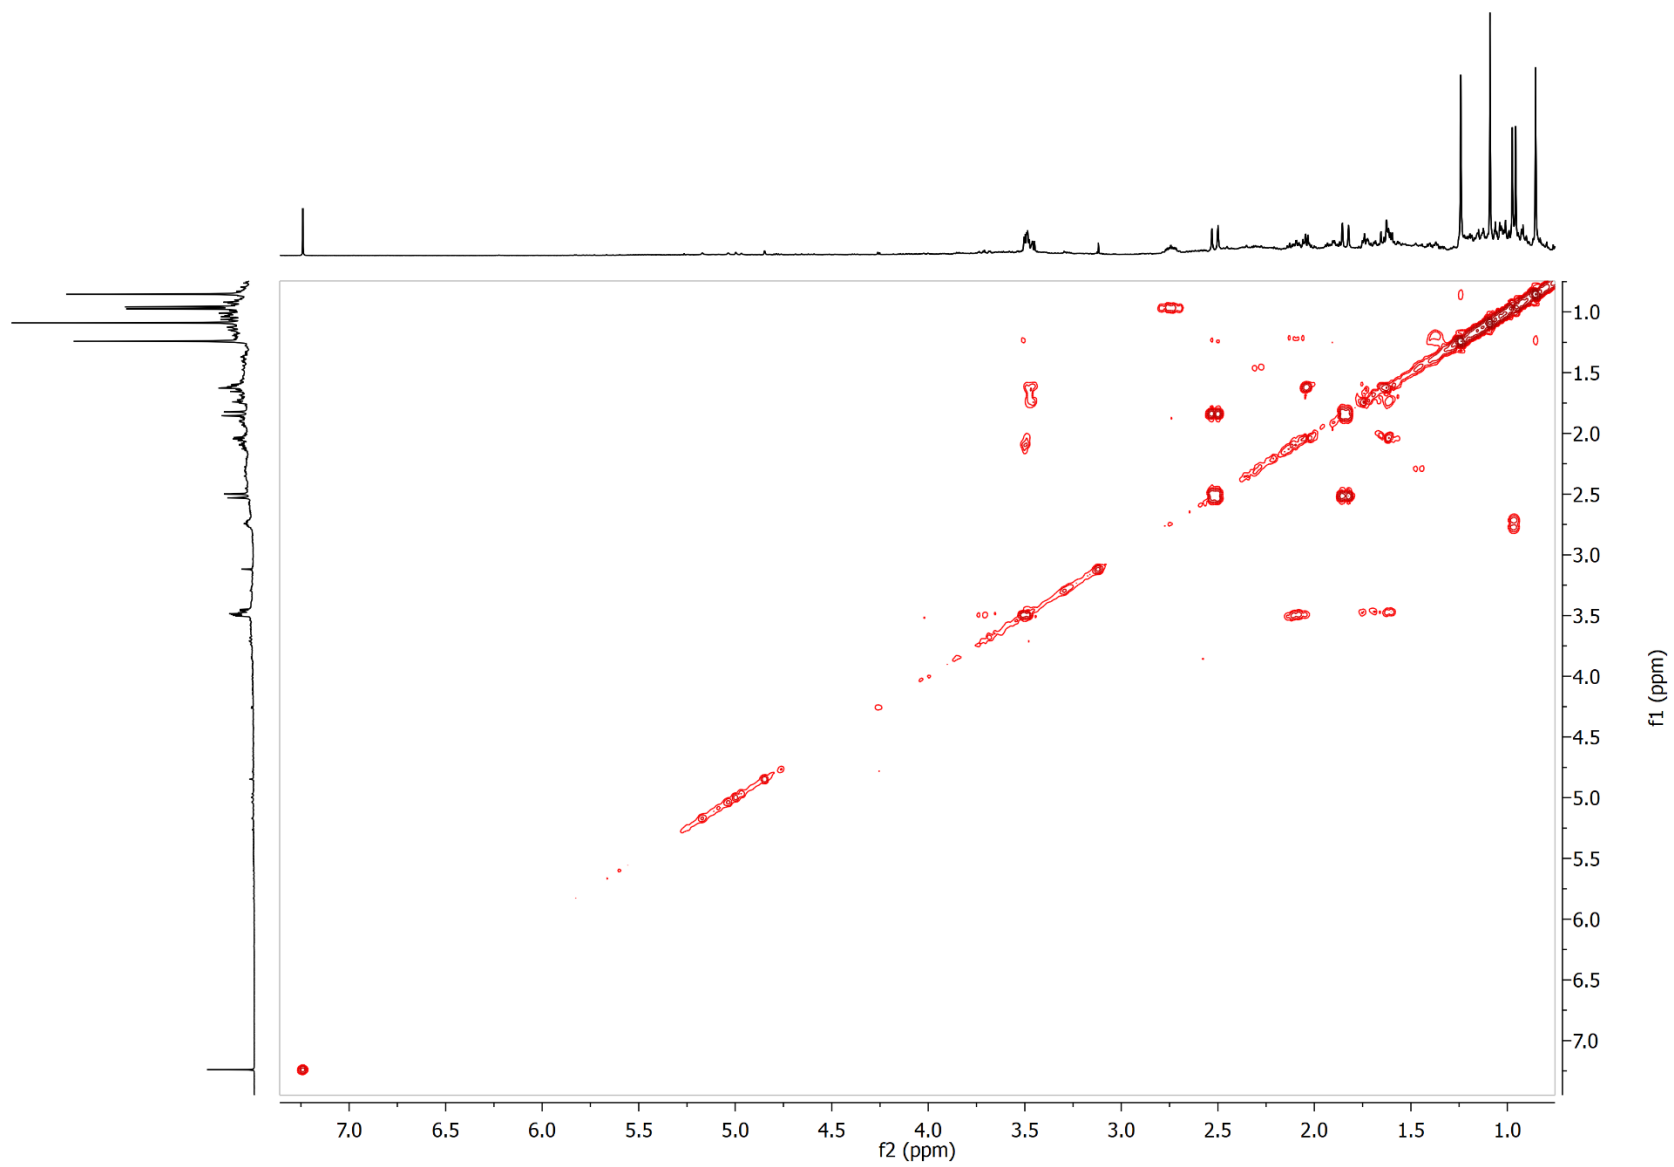

**Figure S42.**  $^1\text{H}$ - $^1\text{H}$  NOESY NMR (400 MHz,  $\text{CDCl}_3$ ) spectrum of **3**

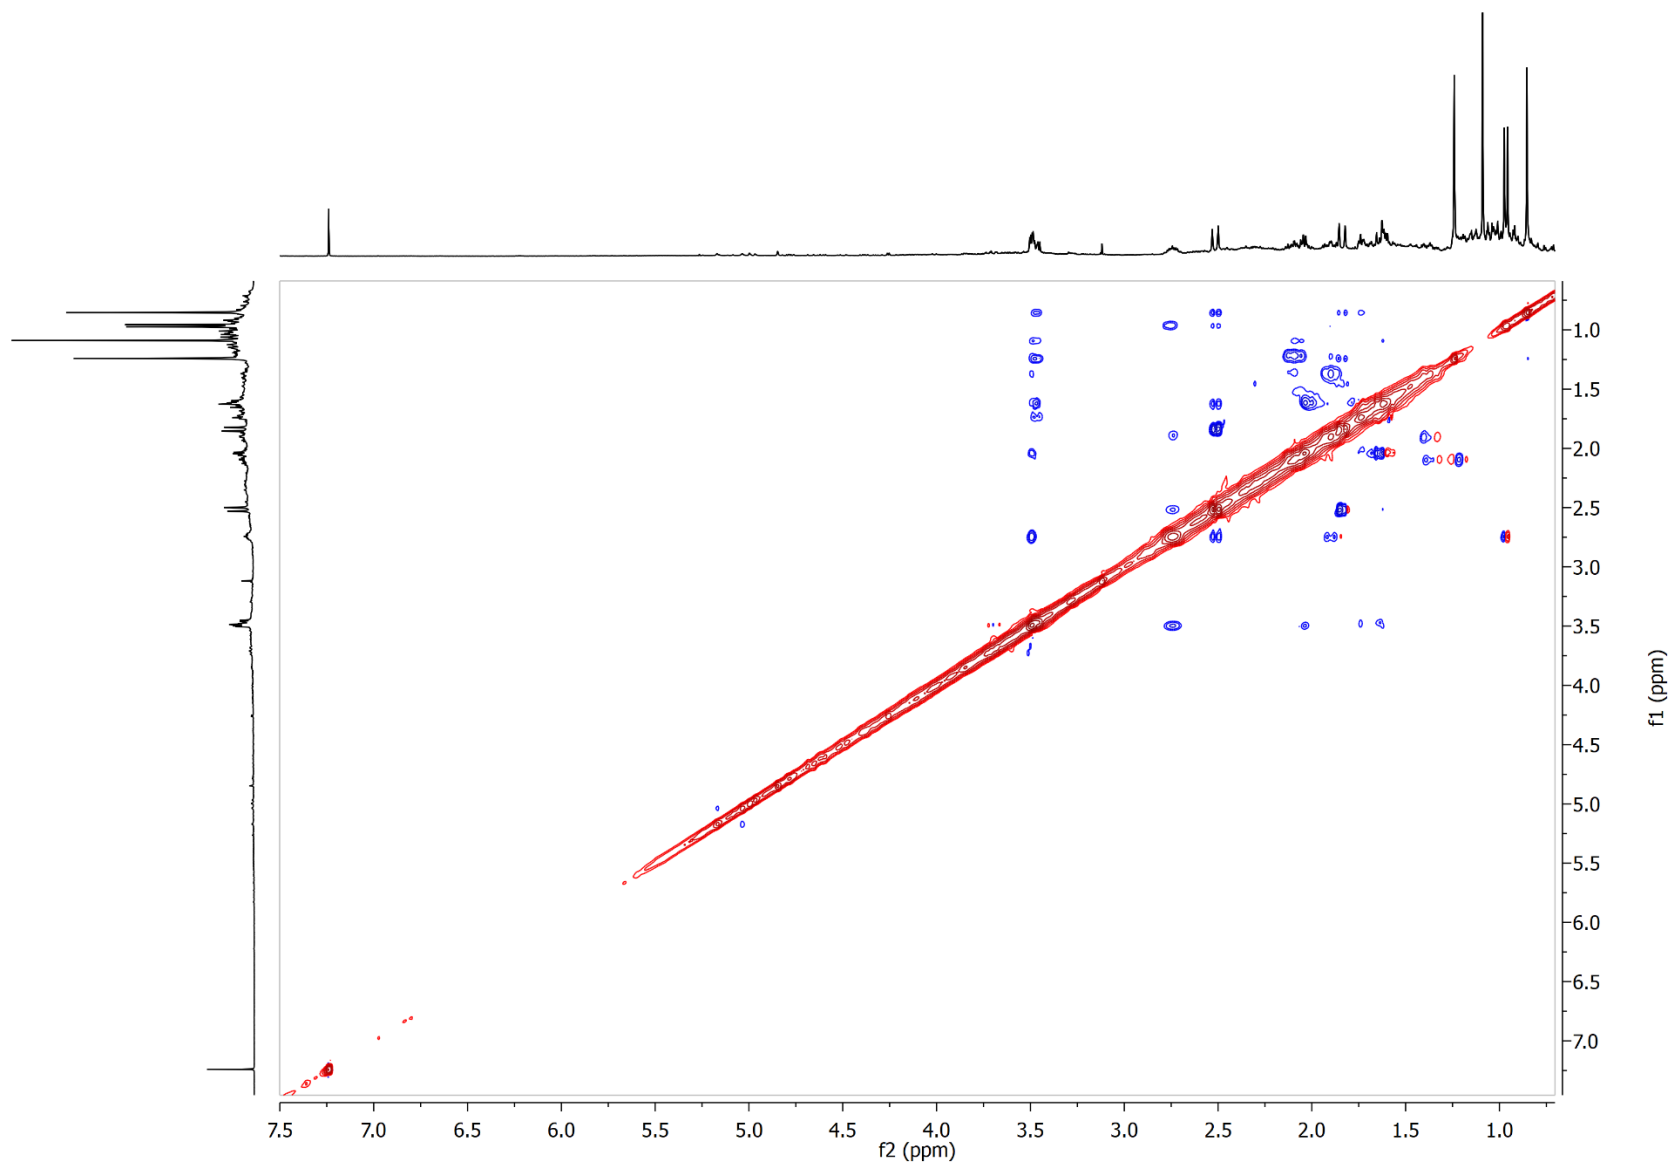

**Figure S43.**  $^1\text{H}$ - $^1\text{H}$  NOESY NMR (400 MHz,  $\text{CDCl}_3$ ) extension spectrum of **3**

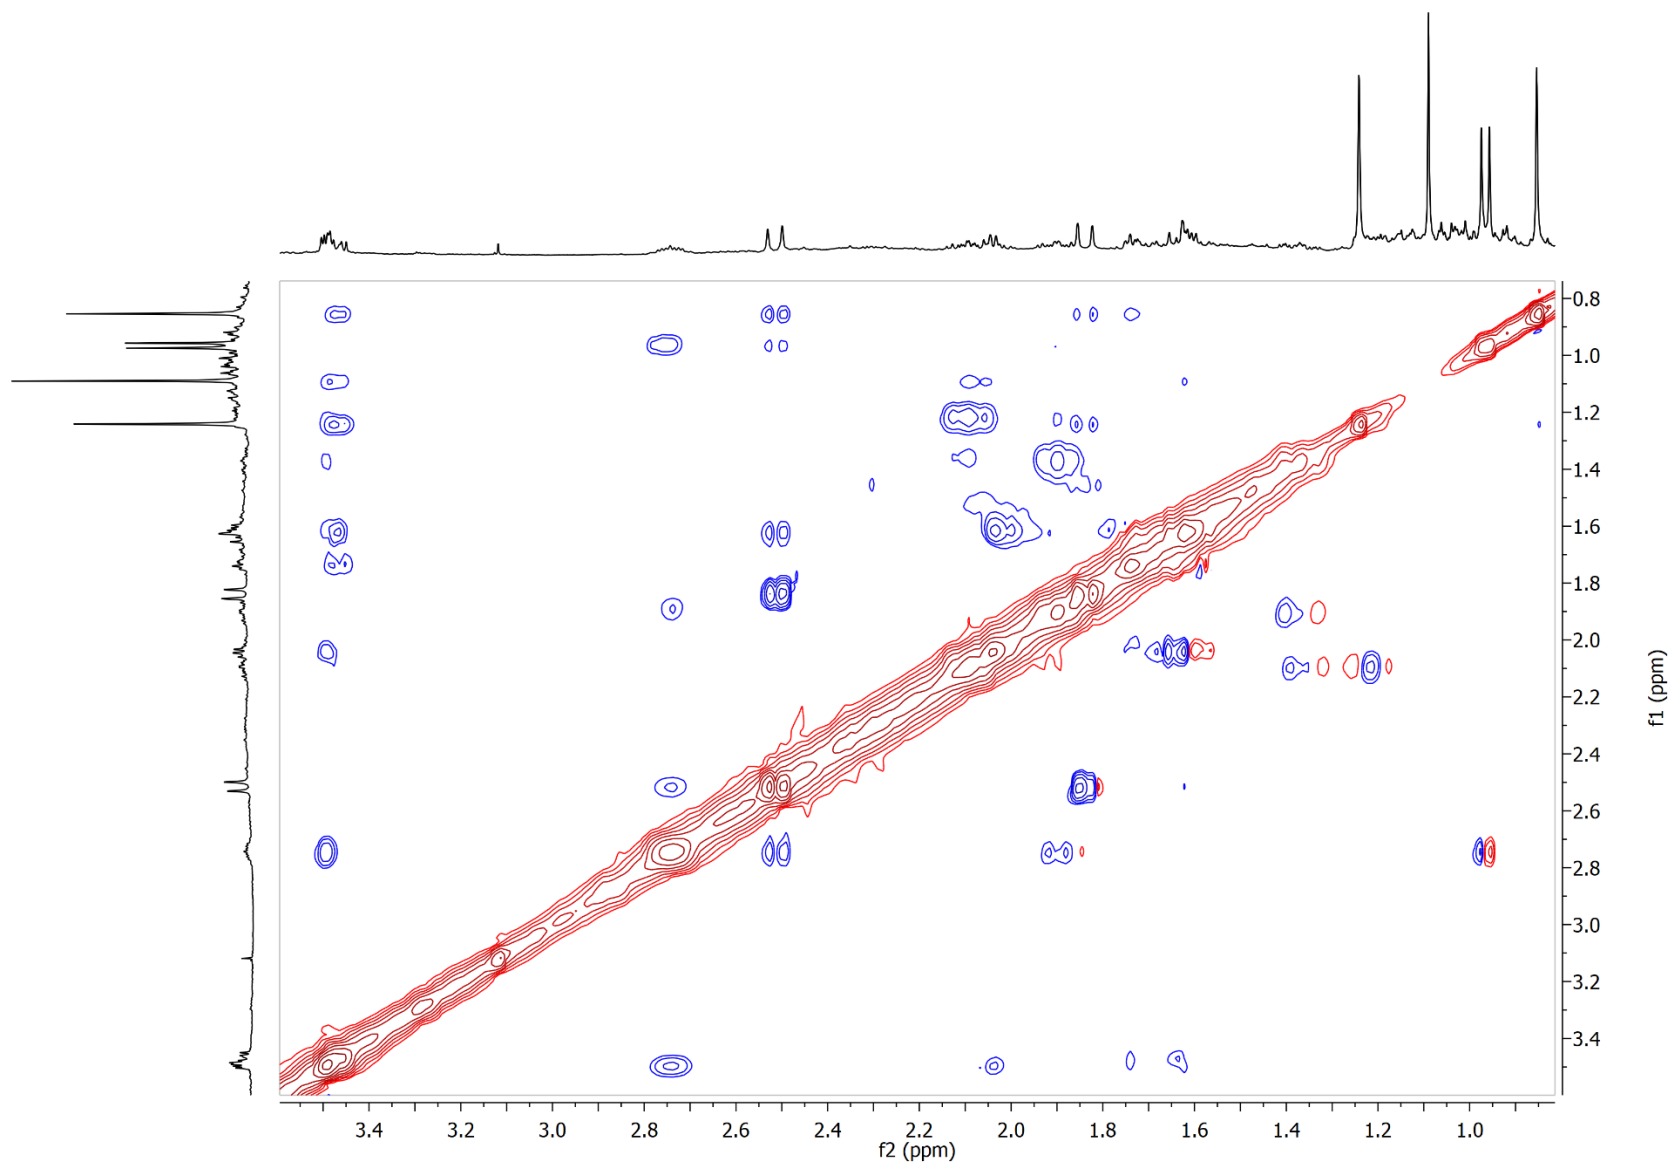

**Figure S44.**  $^1\text{H}$  NMR (400 MHz,  $\text{CDCl}_3$ ) spectrum of acetylated **3**

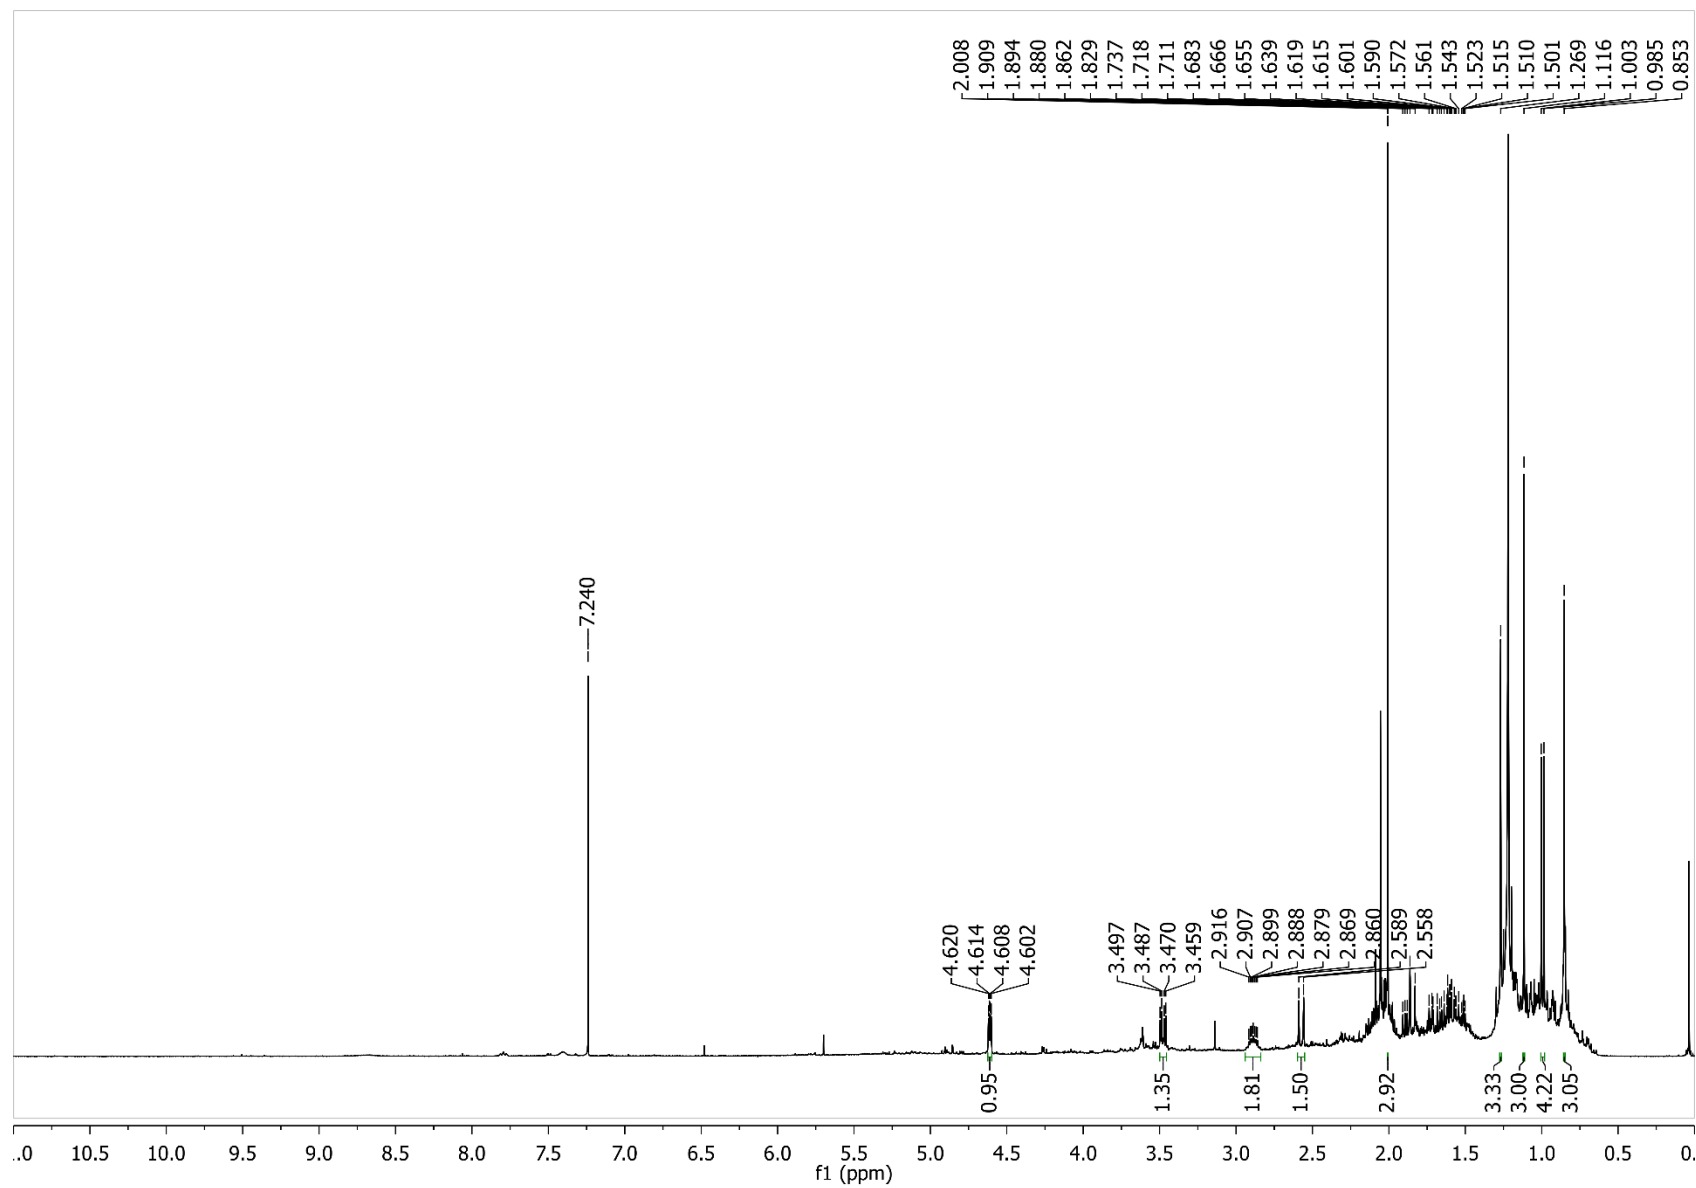

Figure S45. <sup>1</sup>H NMR (400 MHz, CDCl<sub>3</sub>) extension spectrum of acetylated **3**

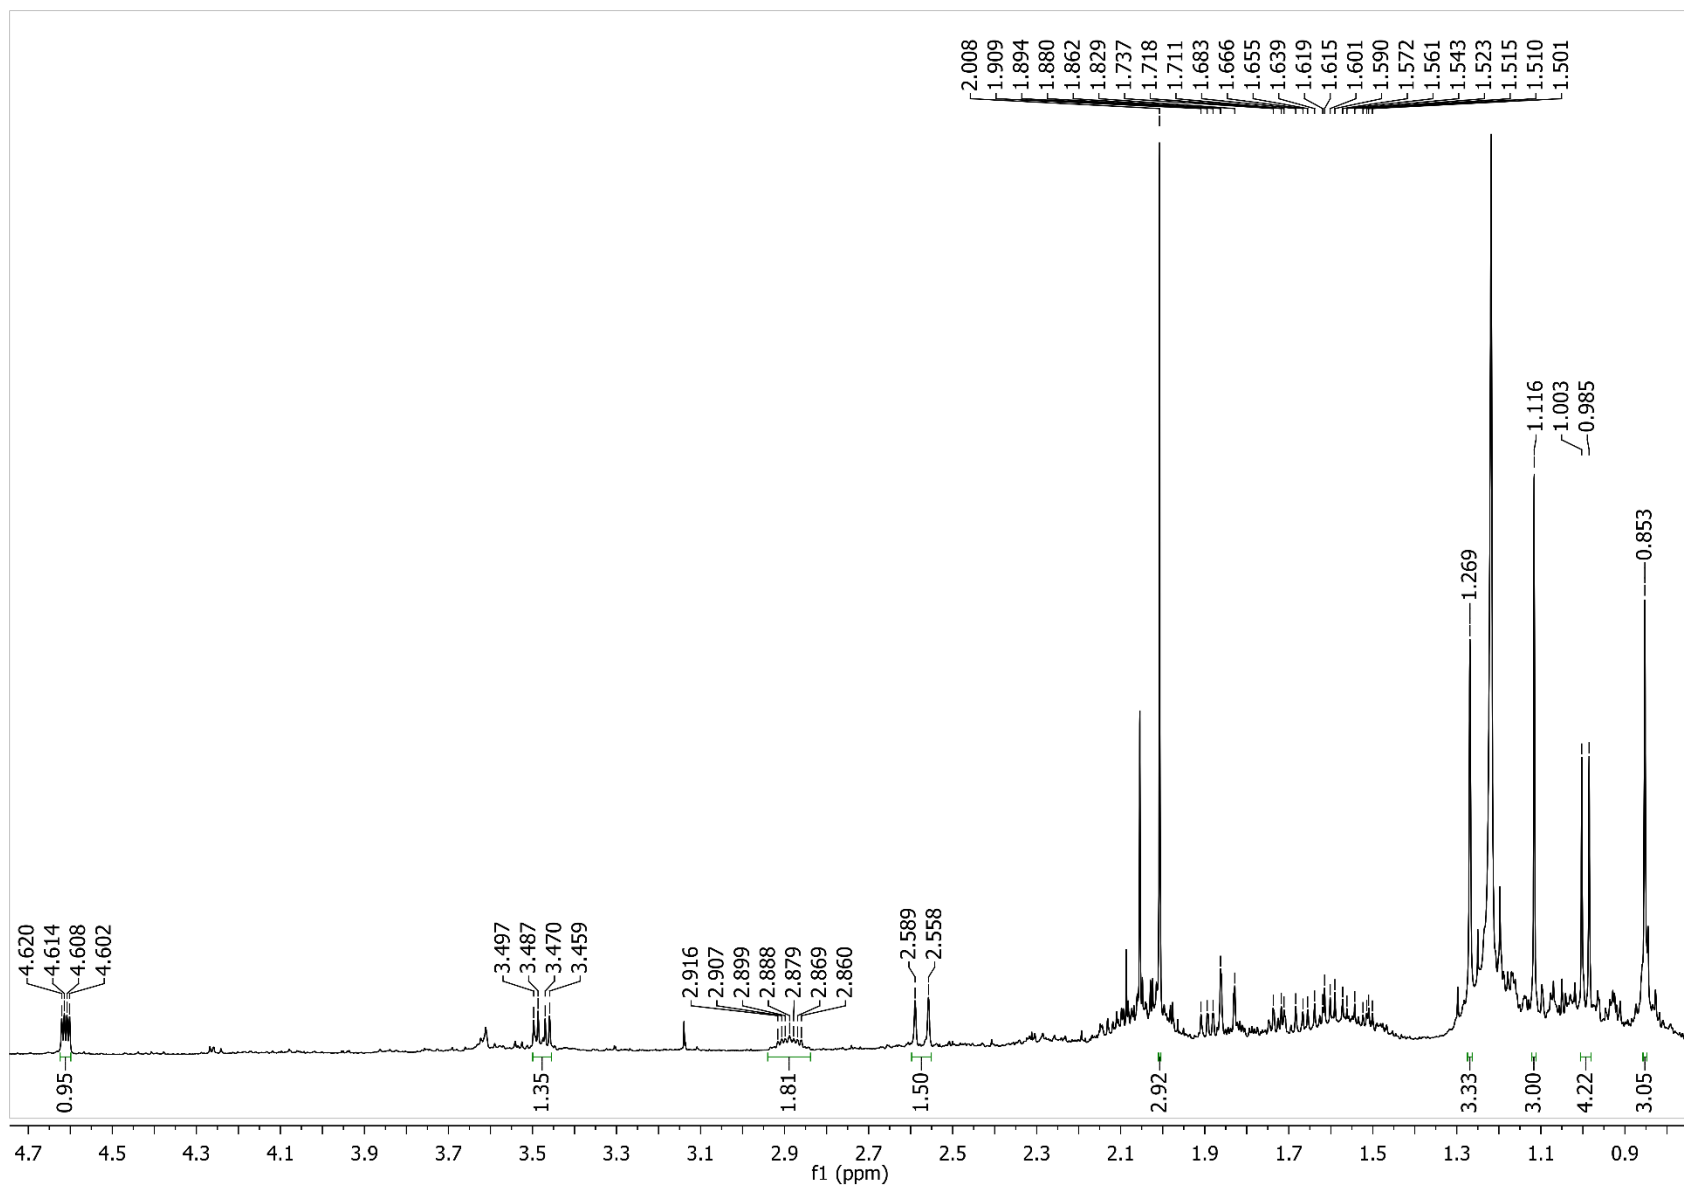



**Figure S46.**  $^{13}\text{C}$  NMR (100 MHz,  $\text{CDCl}_3$ ) spectrum of acetylated **3**

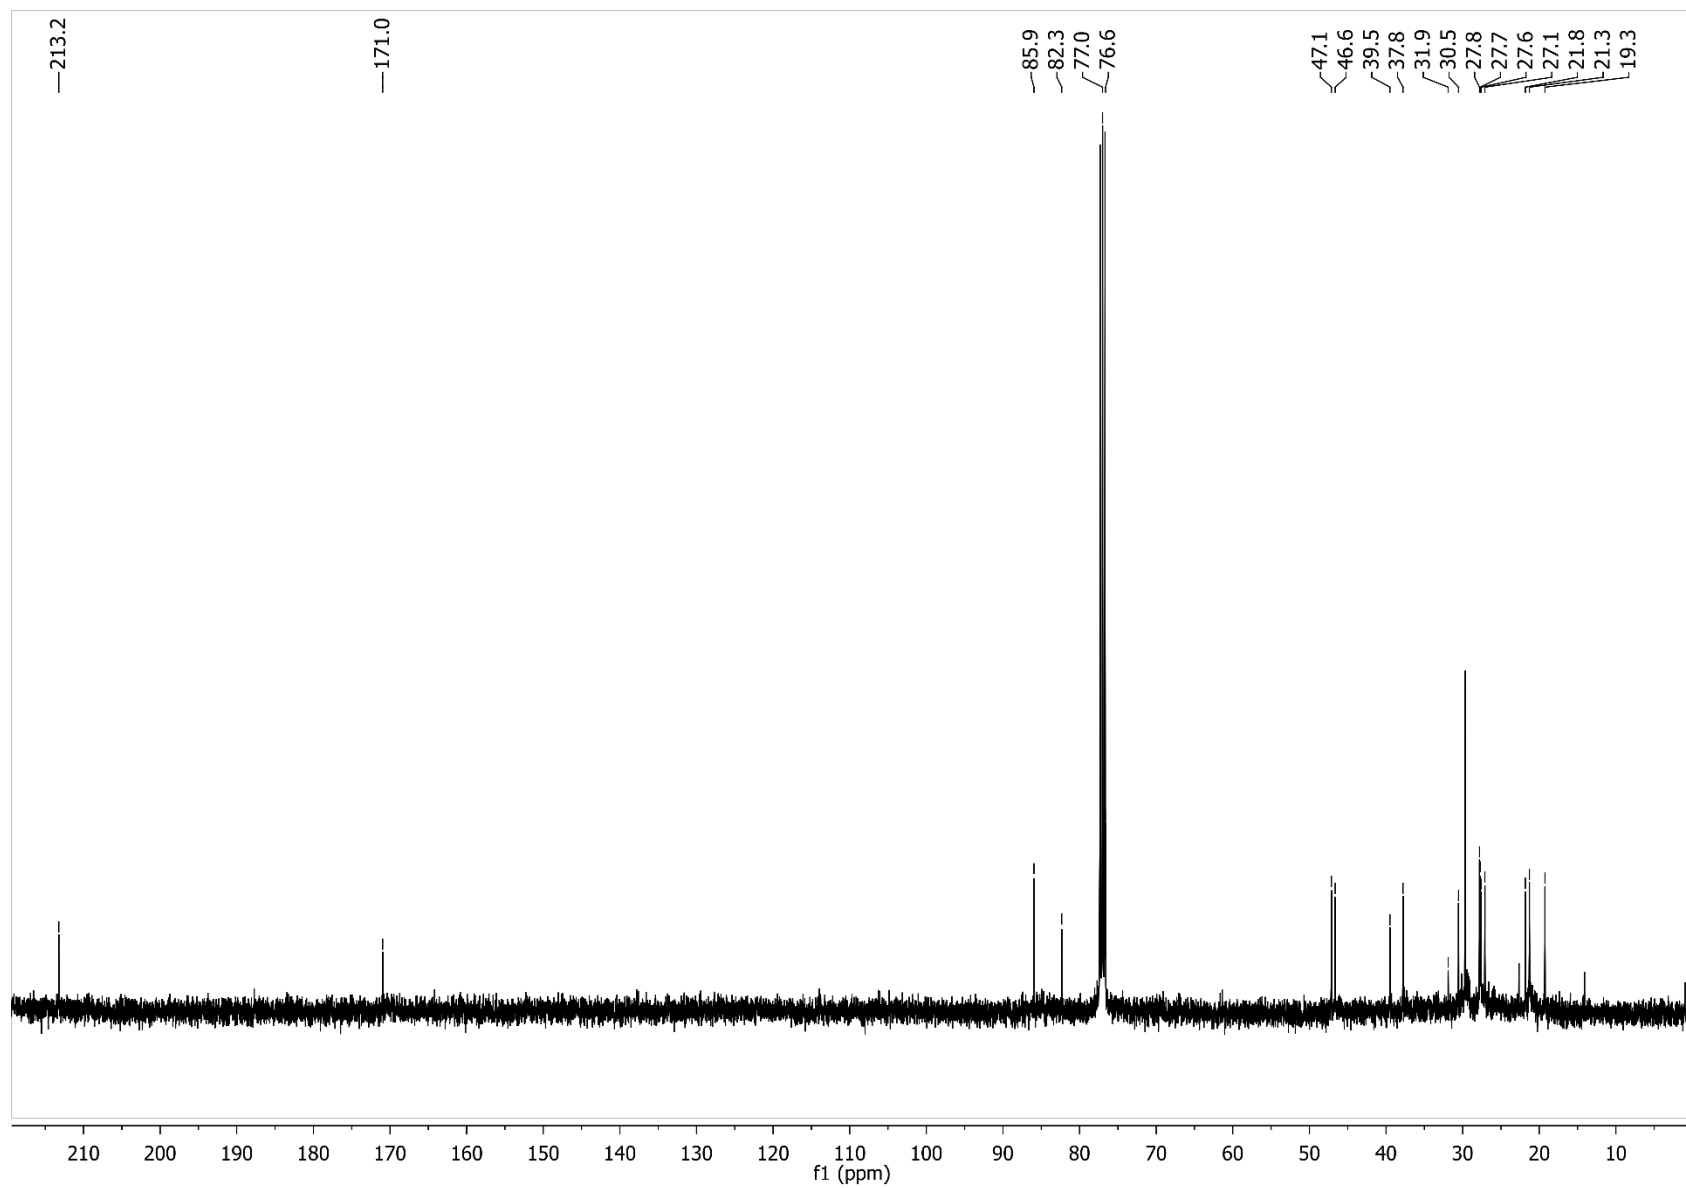

**Figure S47.** HSQC NMR (400 MHz, CDCl<sub>3</sub>) spectrum of acetylated **3**

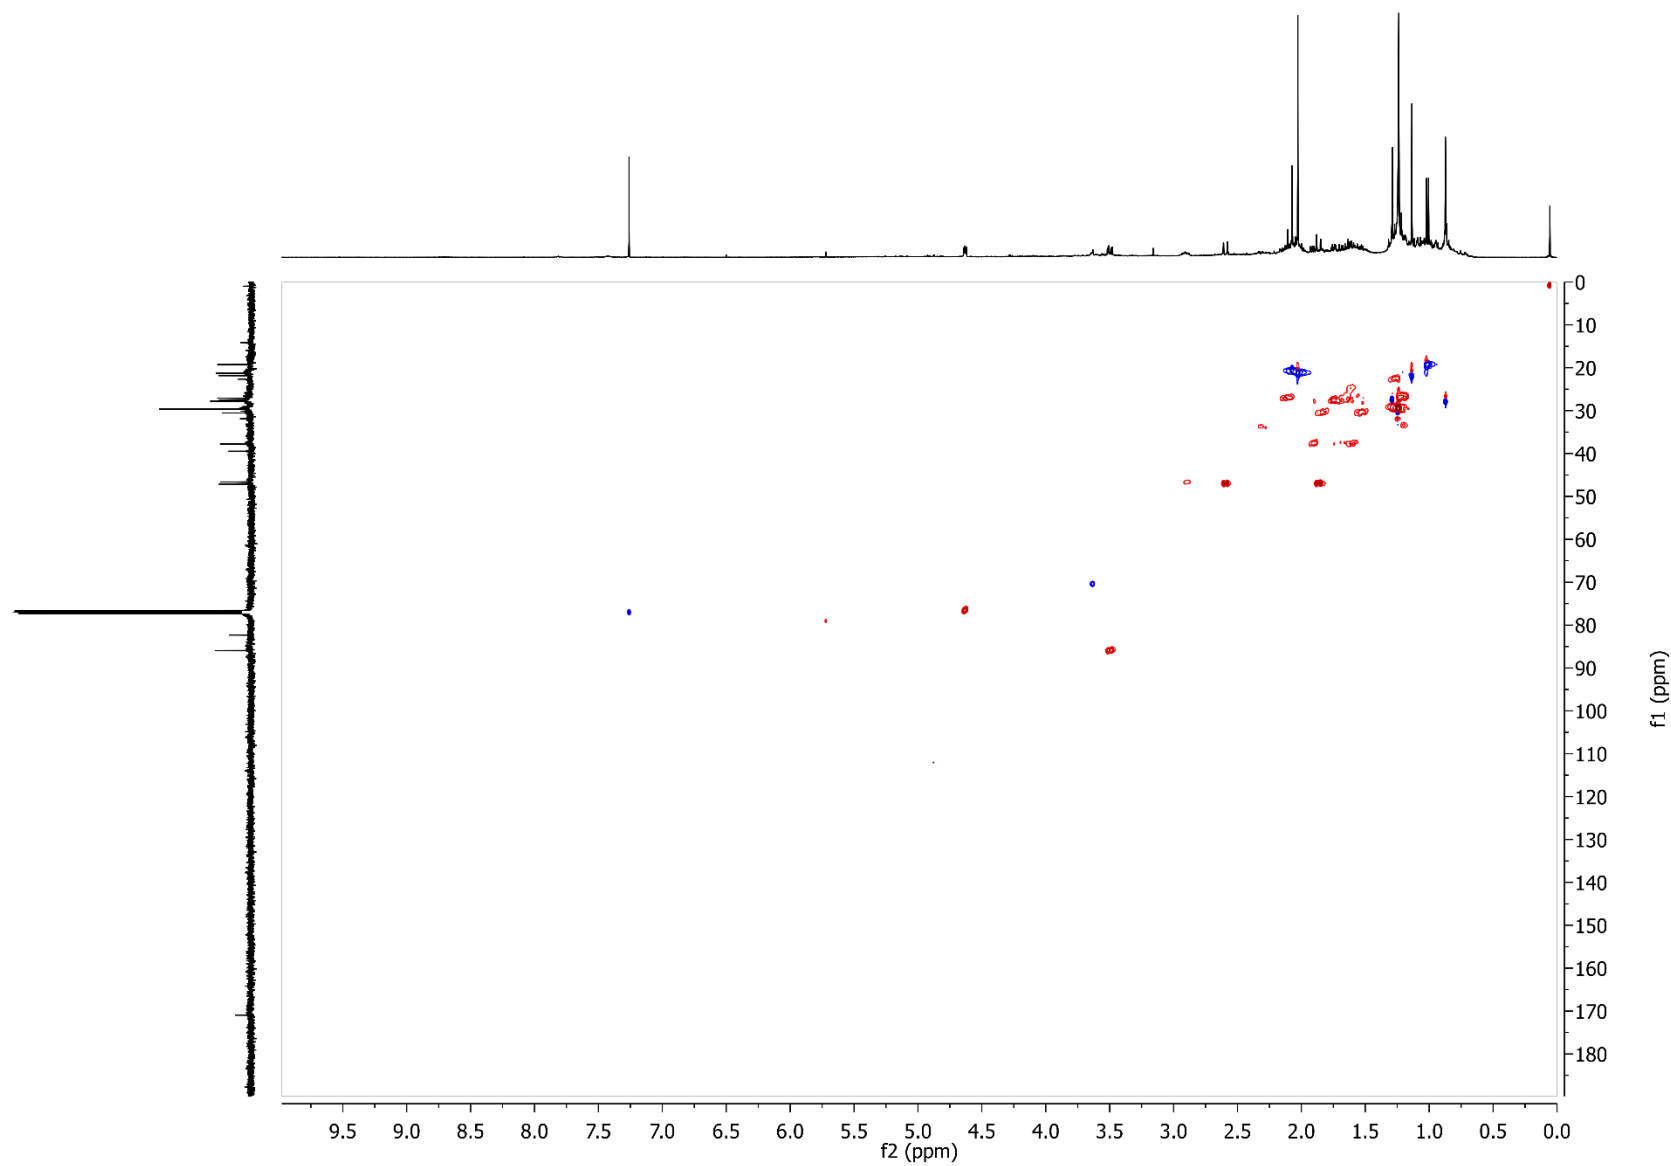

**Figure S48.** HSQC NMR (400 MHz, CDCl<sub>3</sub>) extension spectrum of acetylated **3**

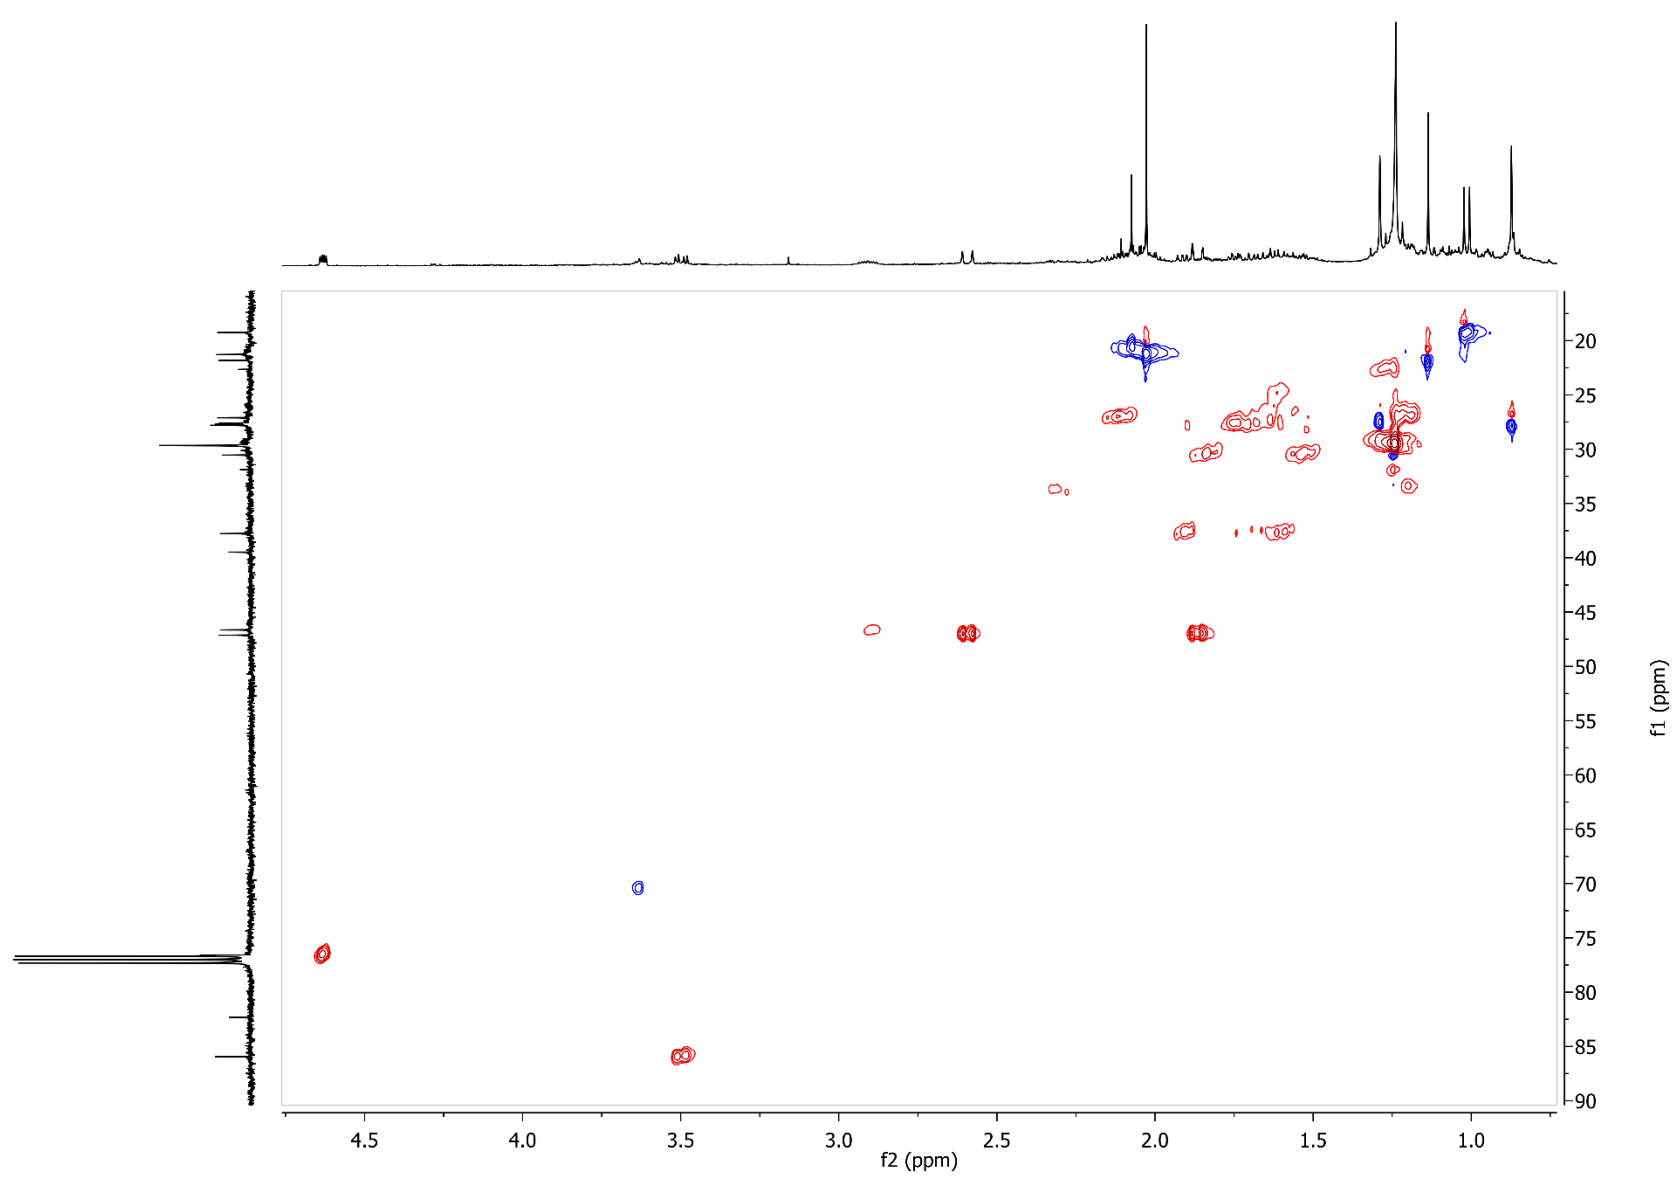

**Figure S49.** HMBC NMR (400 MHz, CDCl<sub>3</sub>) spectrum of acetylated **3**

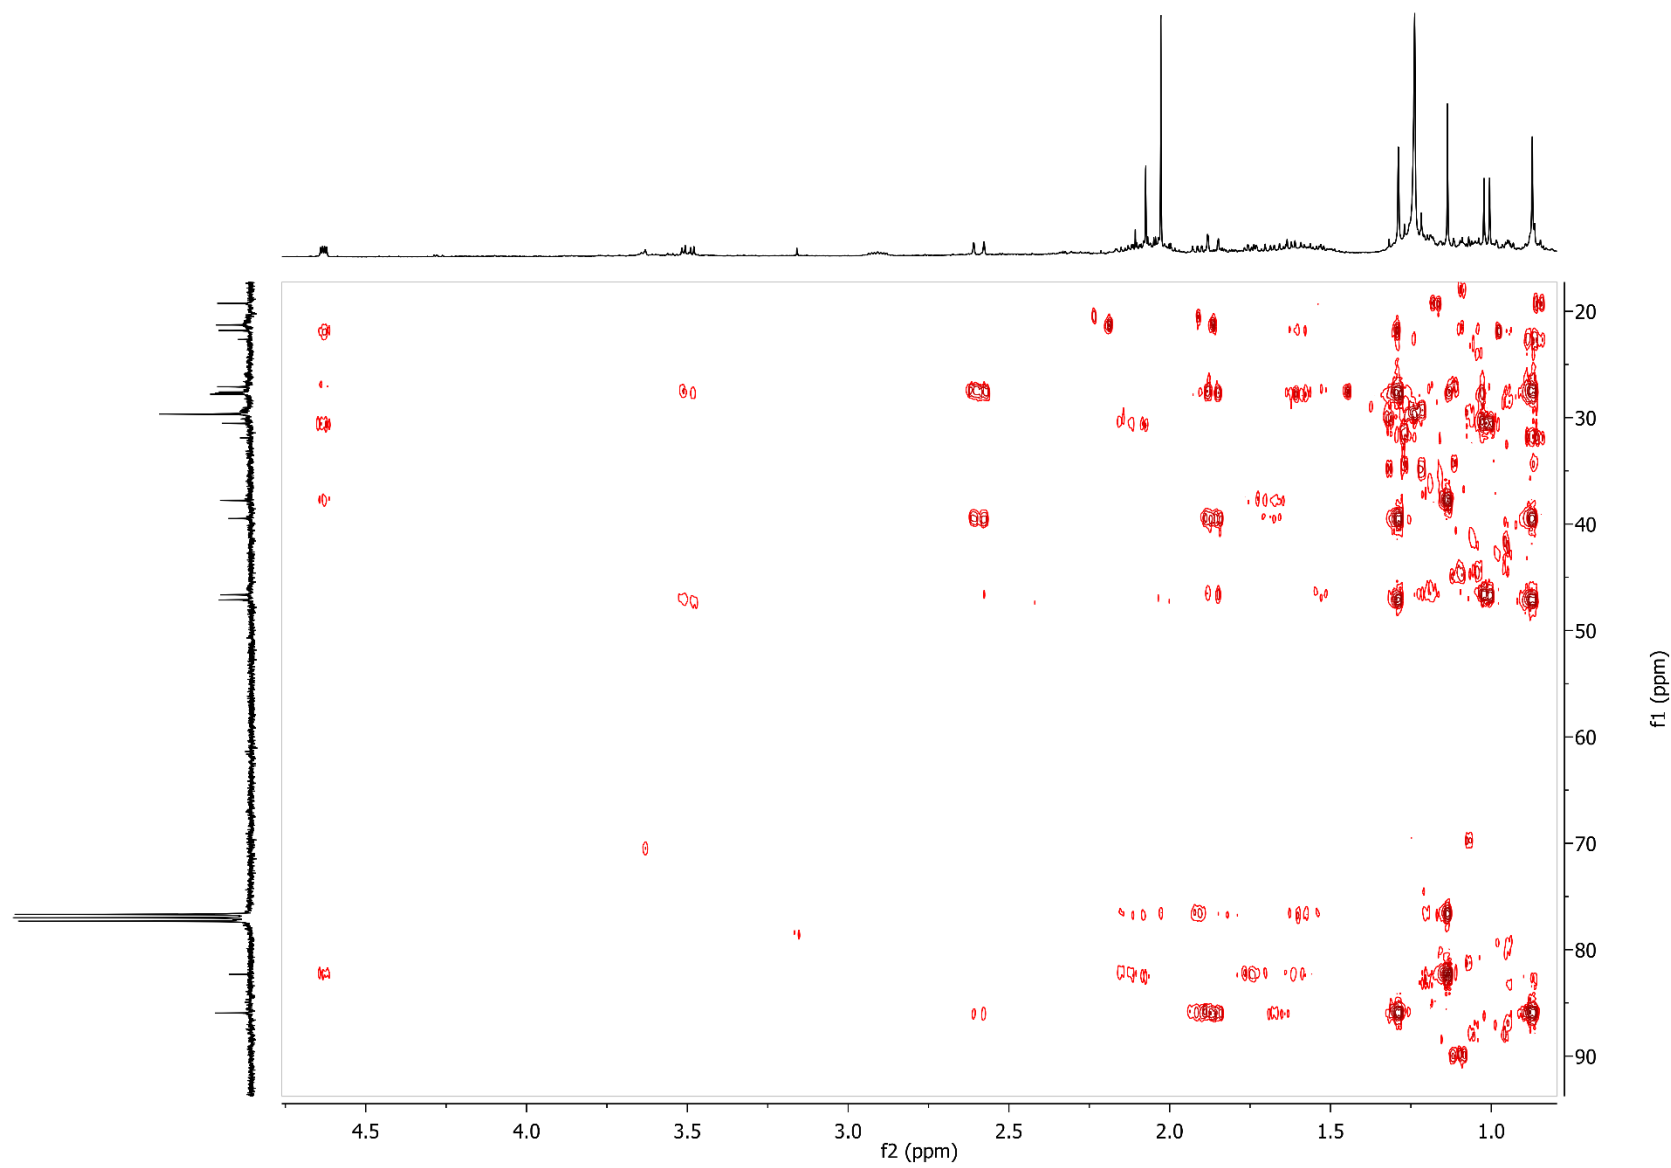

**Figure S50.** HMBC NMR (400 MHz, CDCl<sub>3</sub>) extension spectrum of acetylated **3**

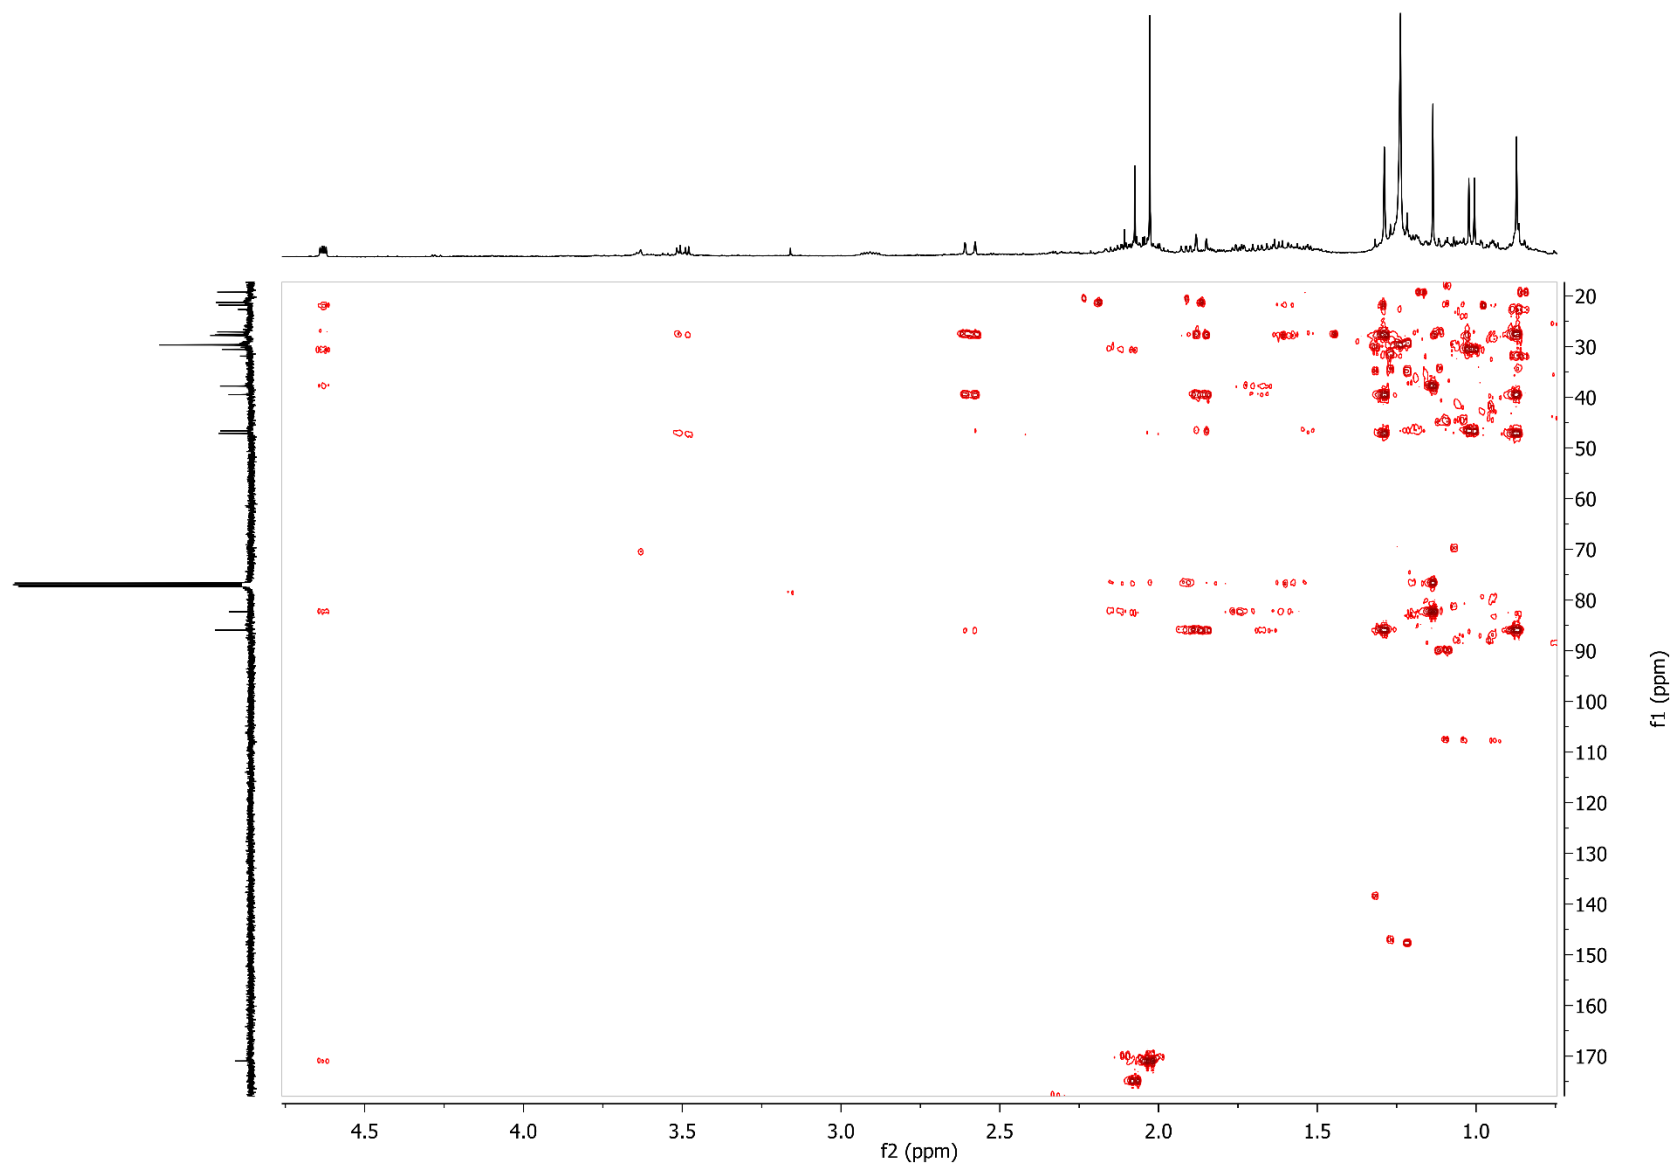

**Figure S51.**  $^1\text{H}$ - $^1\text{H}$  COSY NMR (400 MHz,  $\text{CDCl}_3$ ) spectrum of acetylated **3**

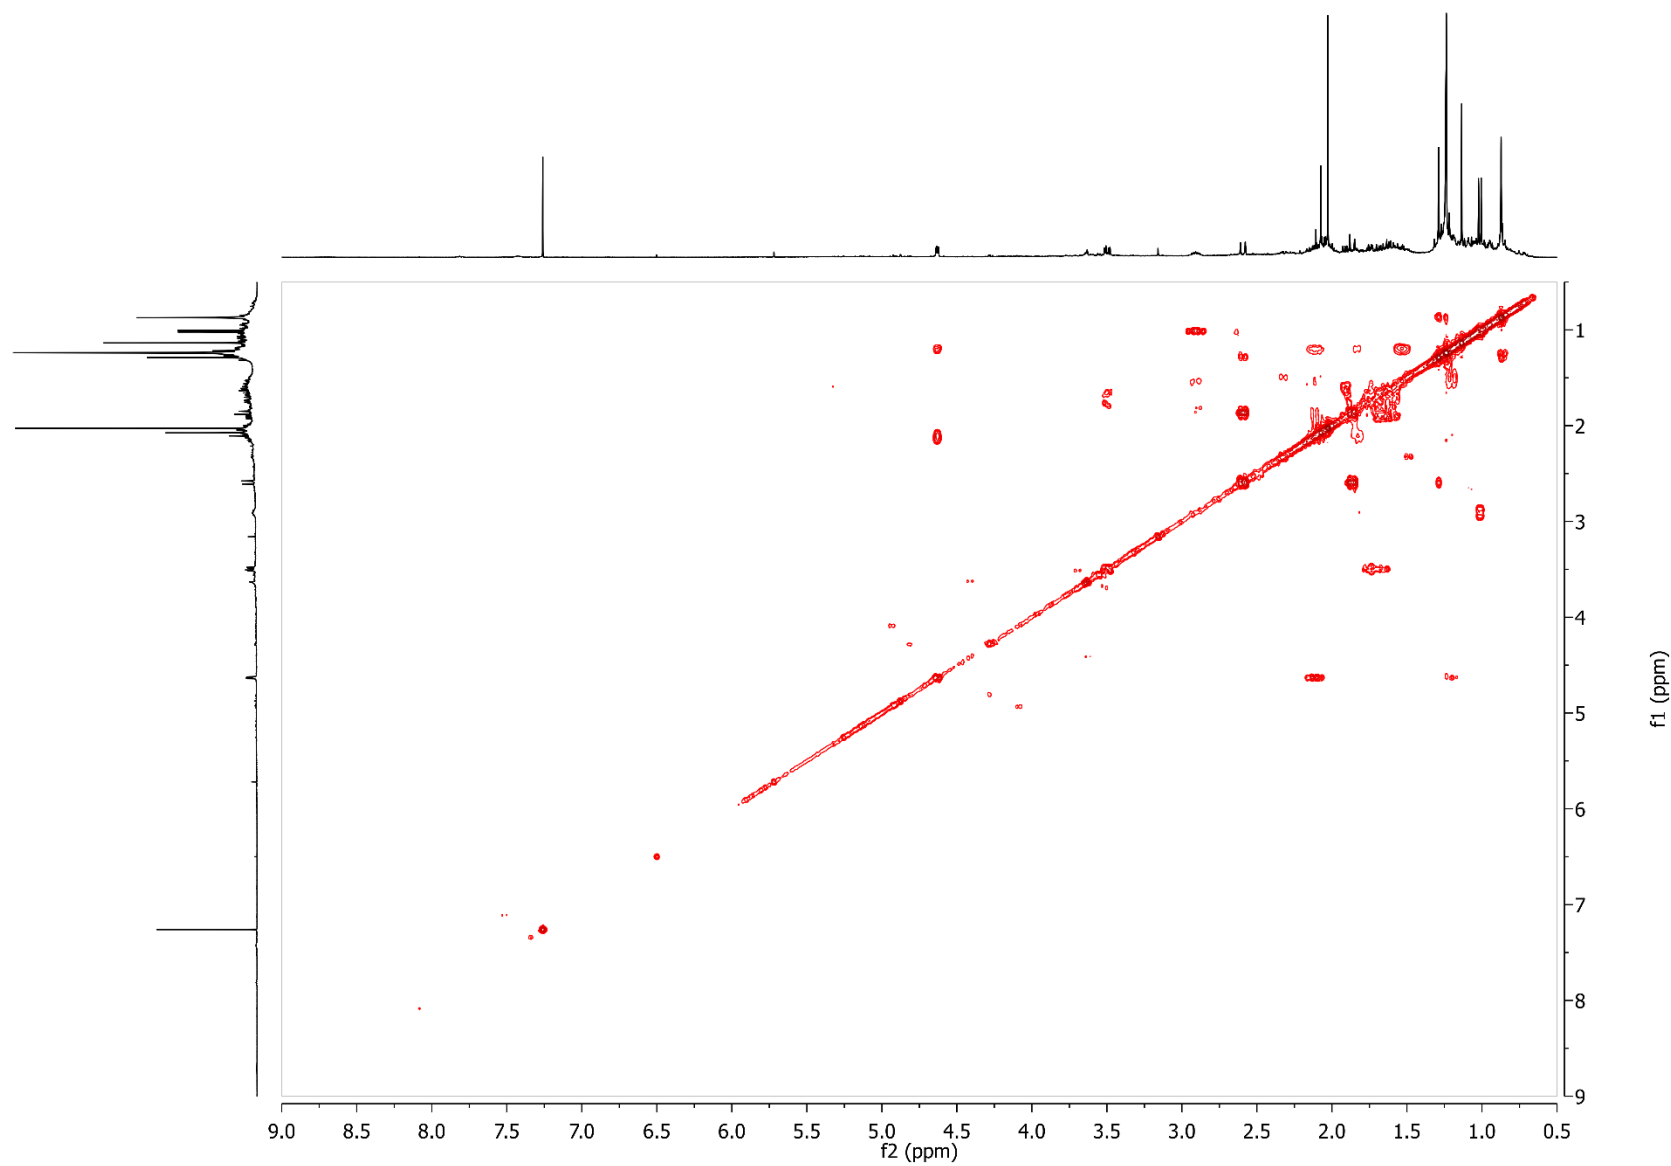

**Figure S52.**  $^1\text{H}$ - $^1\text{H}$  NOESY NMR (400 MHz,  $\text{CDCl}_3$ ) spectrum of acetylated **3**

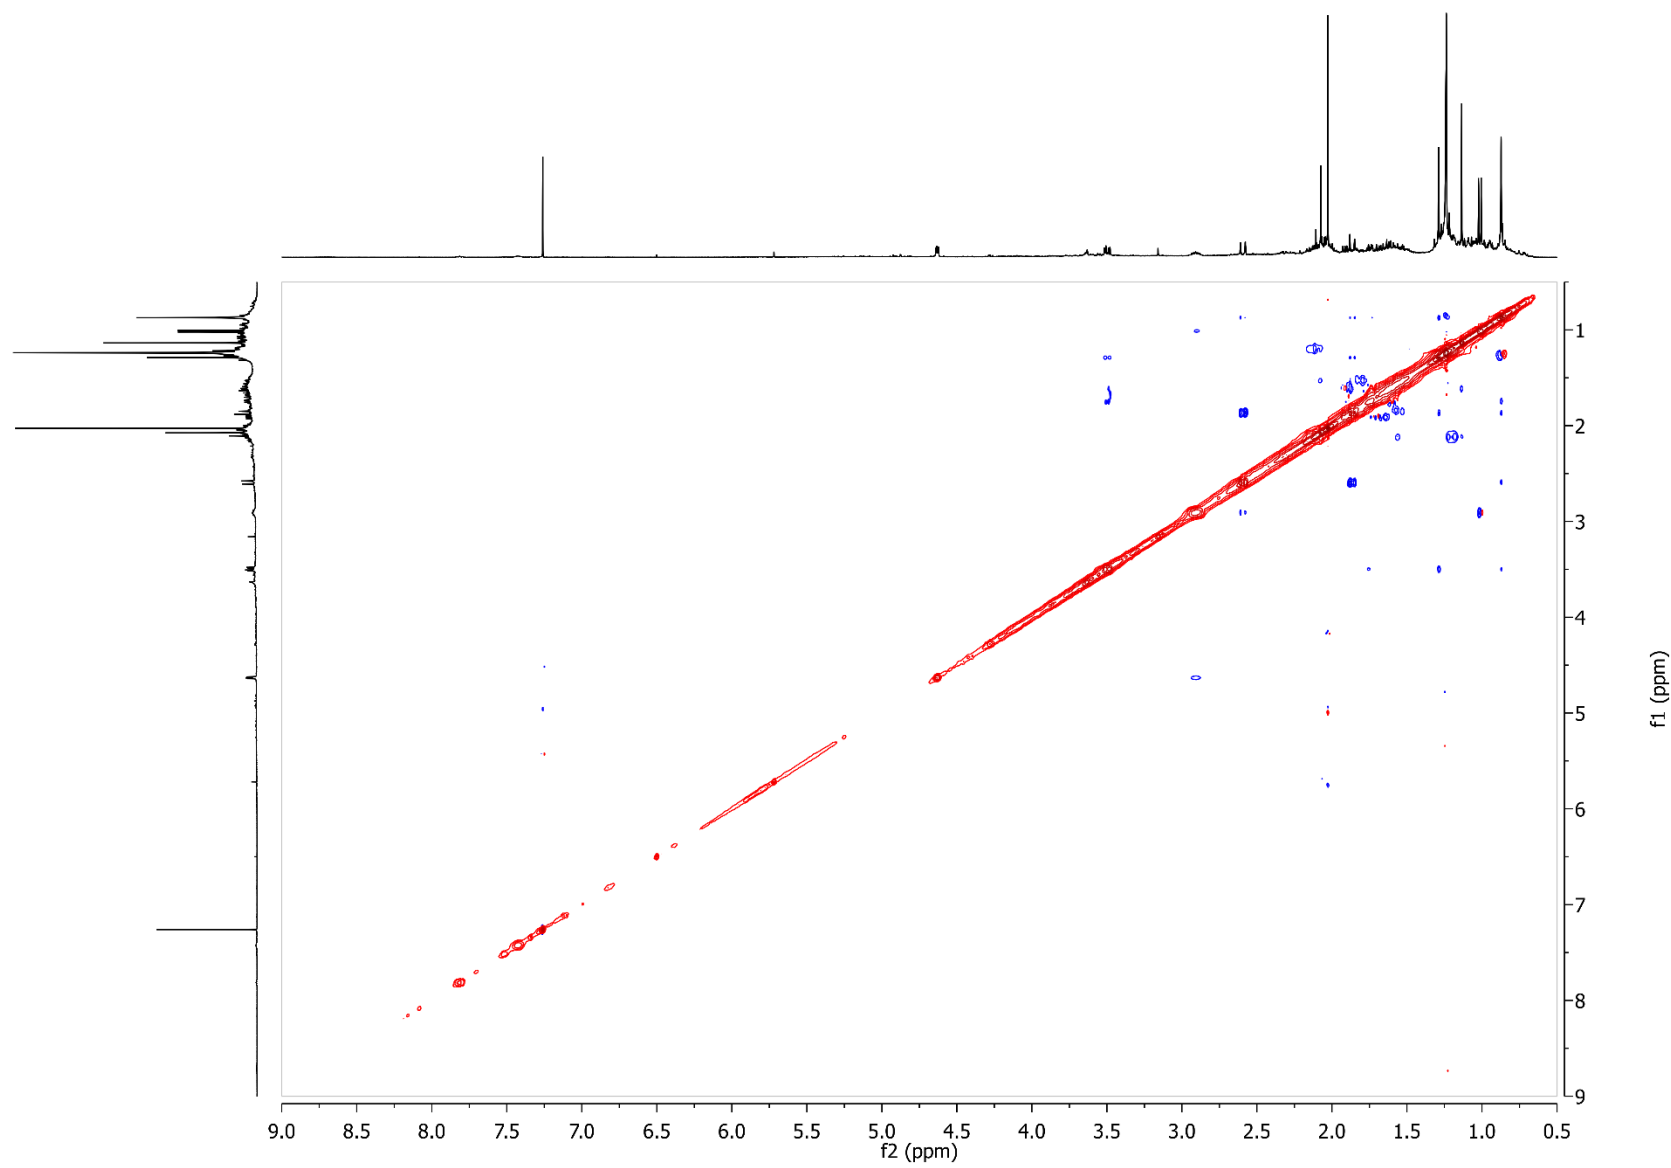

Figure S53.  $^1\text{H}$  NMR (400 MHz,  $\text{C}_5\text{D}_5\text{N}$ ) spectrum of **3**

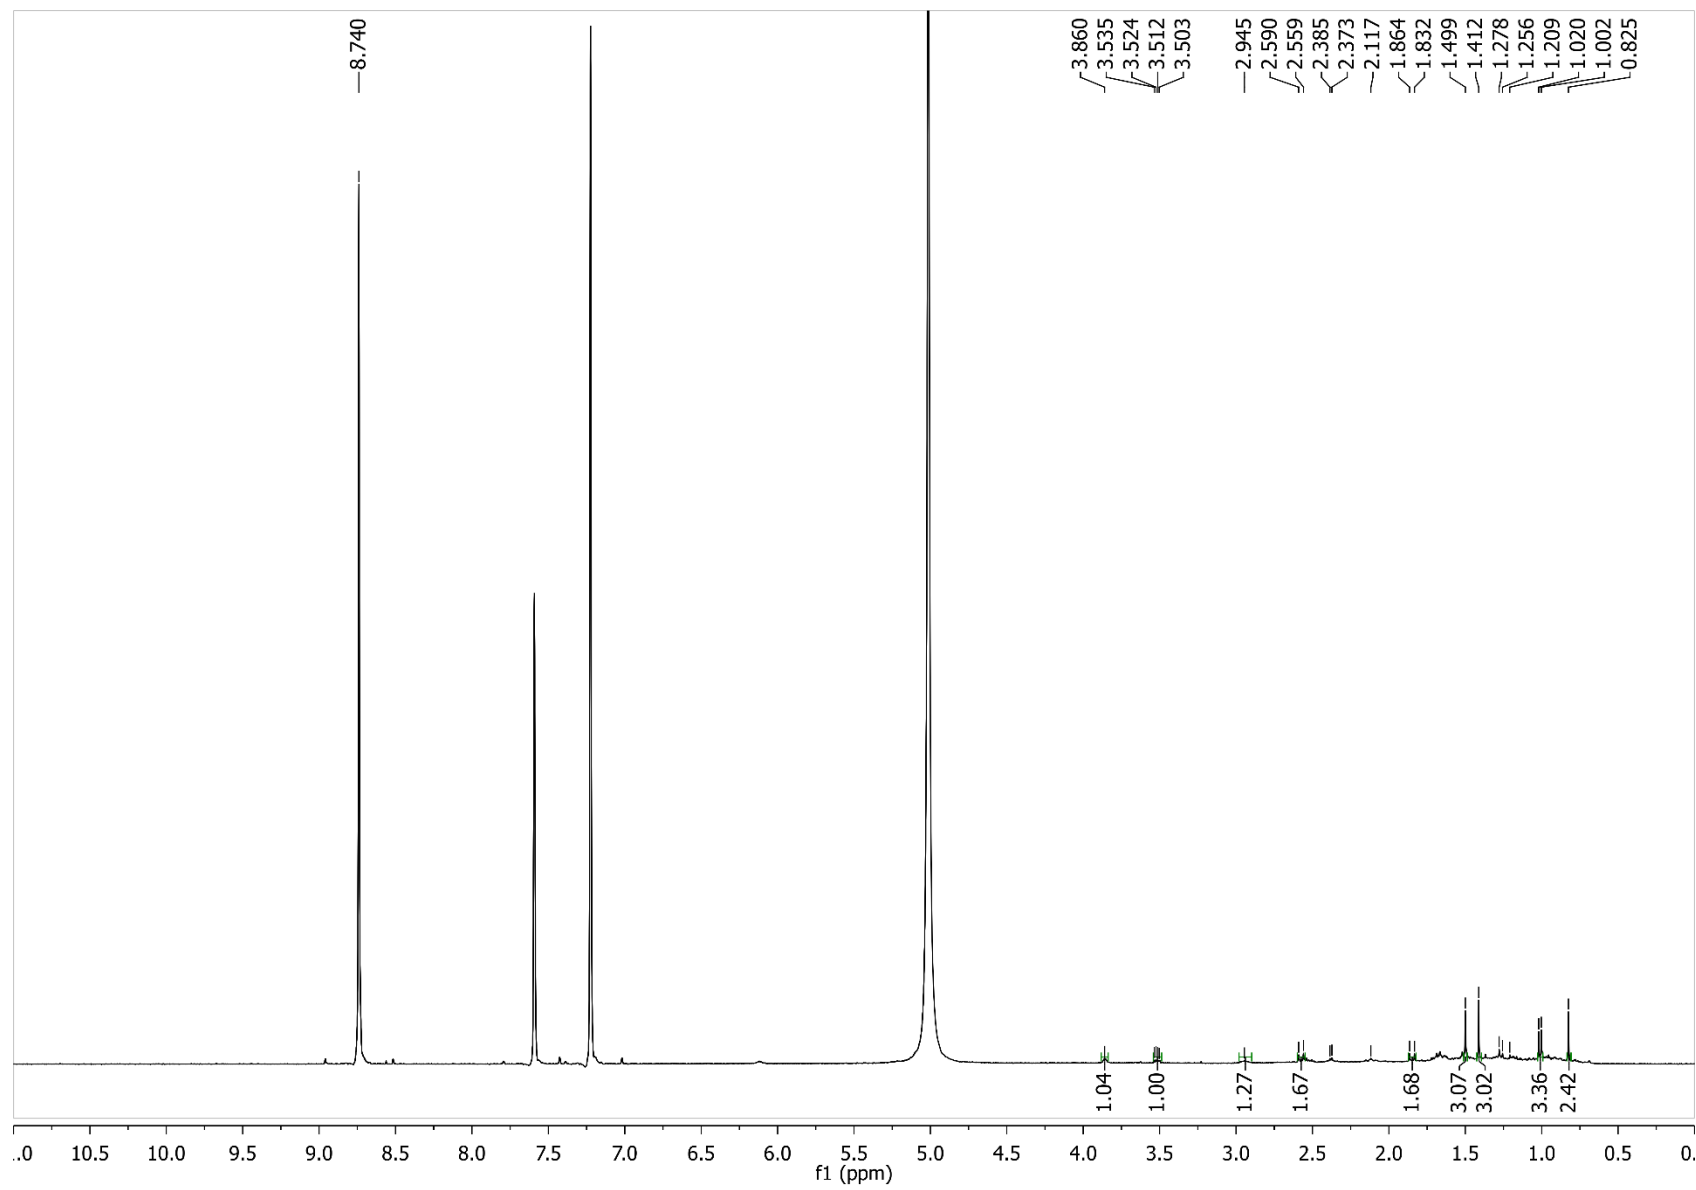



**Figure S54.**  $^1\text{H}$  NMR (400 MHz,  $\text{C}_5\text{D}_5\text{N}$ ) extension spectrum of **3**

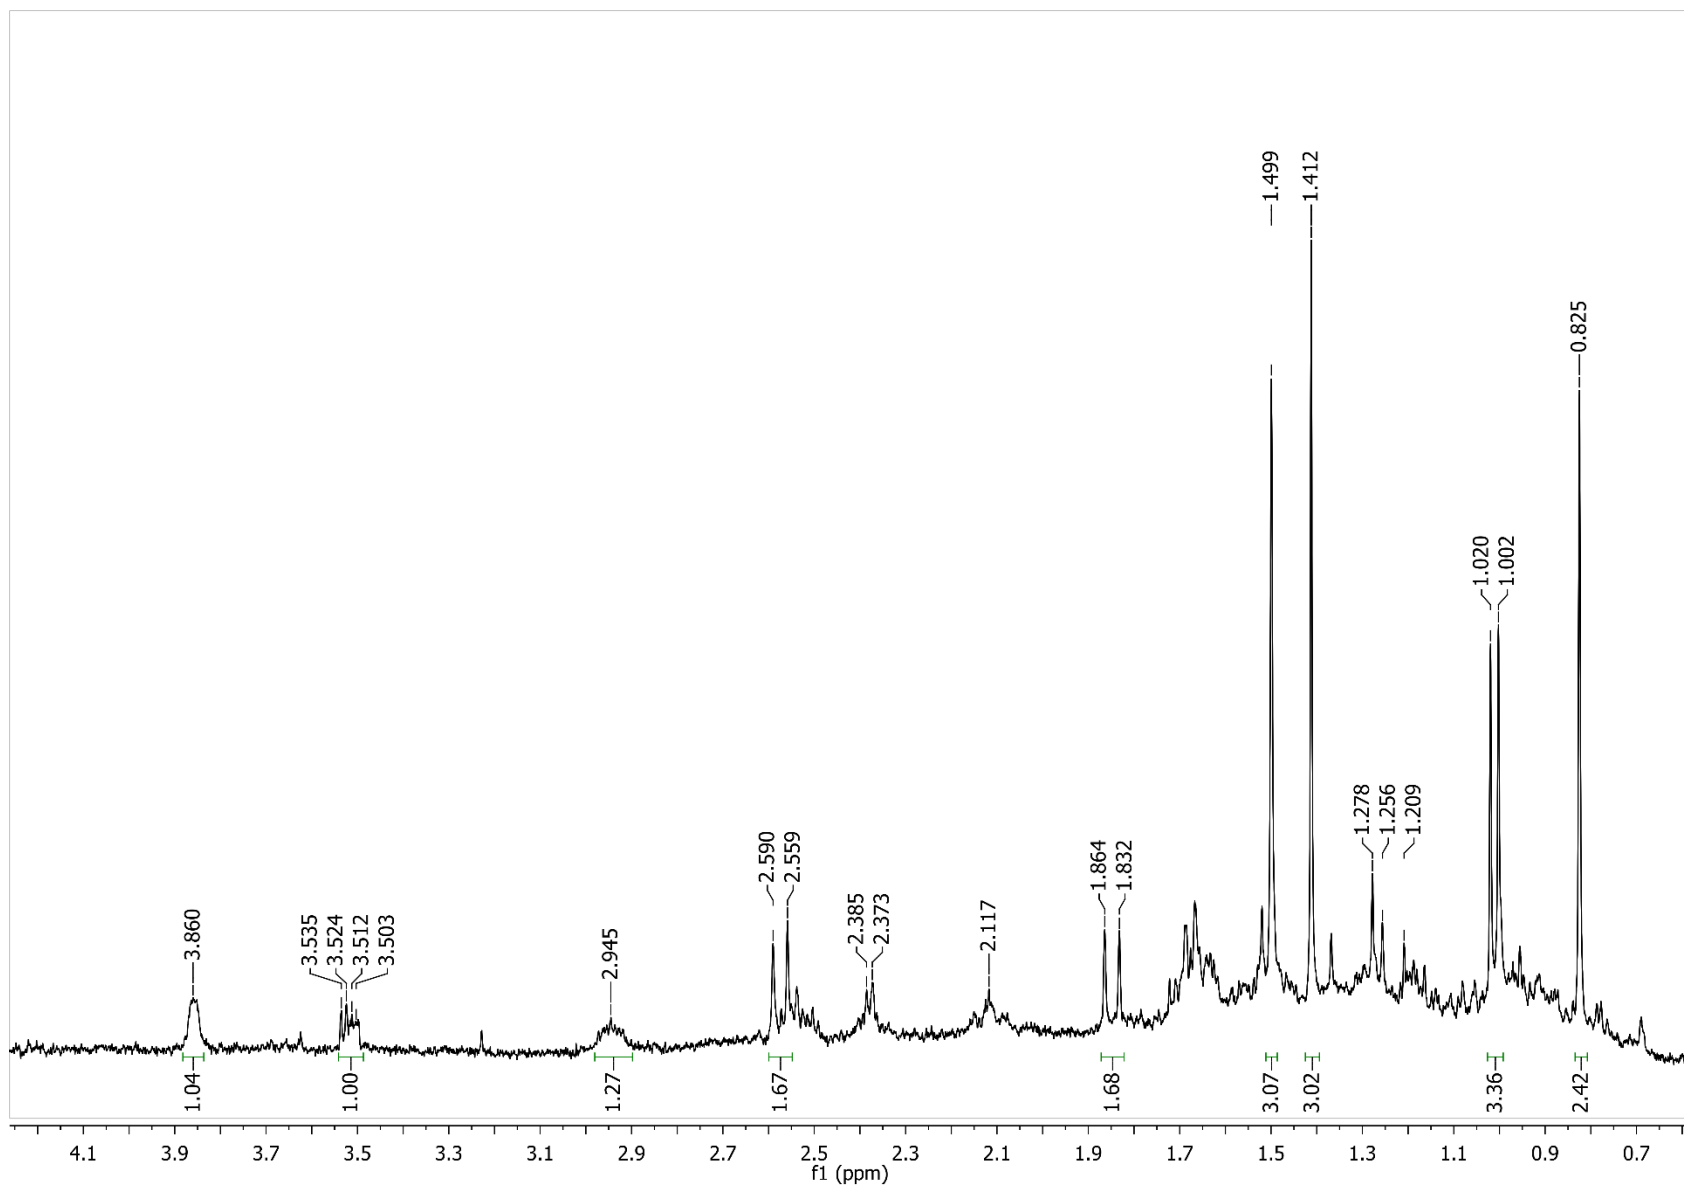

**Figure S55.**  $^1\text{H}$ - $^1\text{H}$  NOESY NMR (400 MHz,  $\text{C}_5\text{D}_5\text{N}$ ) spectrum of acetylated **3**

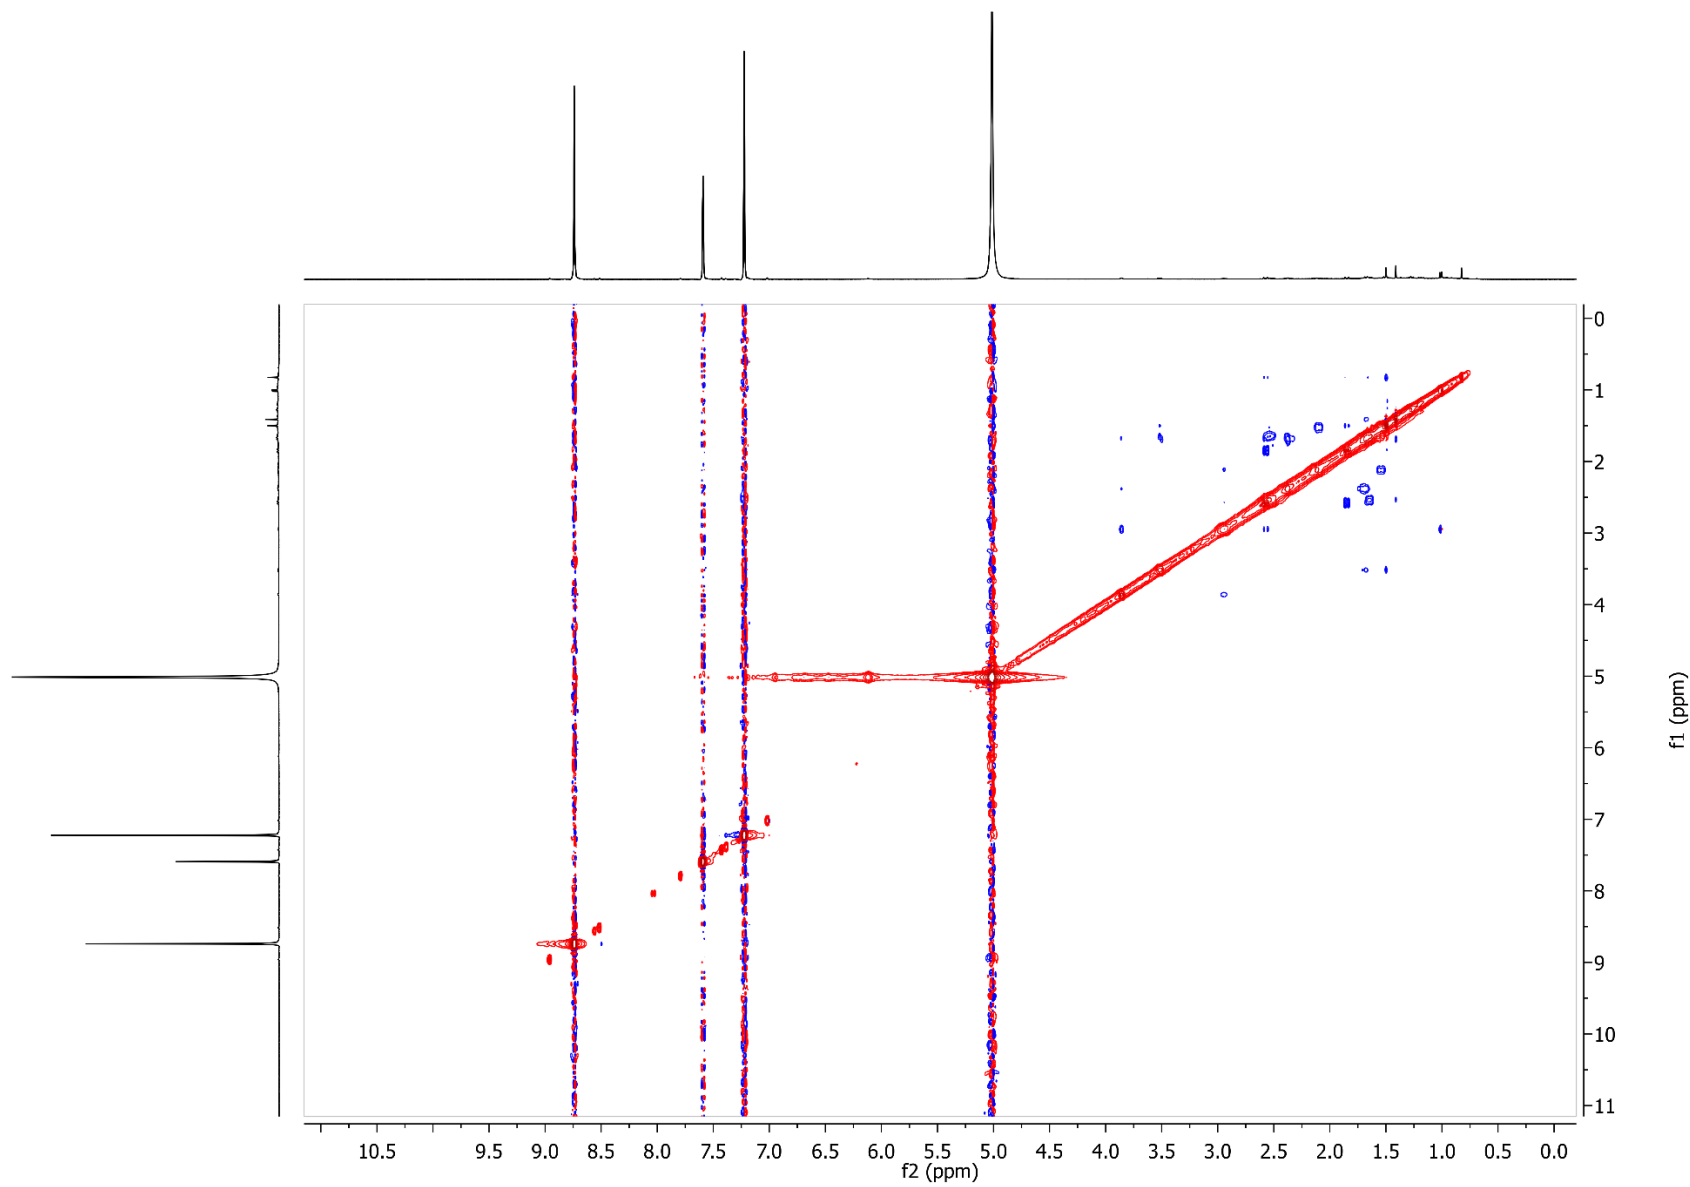

**Figure S56.**  $^1\text{H}$ - $^1\text{H}$  NOESY NMR (400 MHz,  $\text{C}_5\text{D}_5\text{N}$ ) extension spectrum of **3**

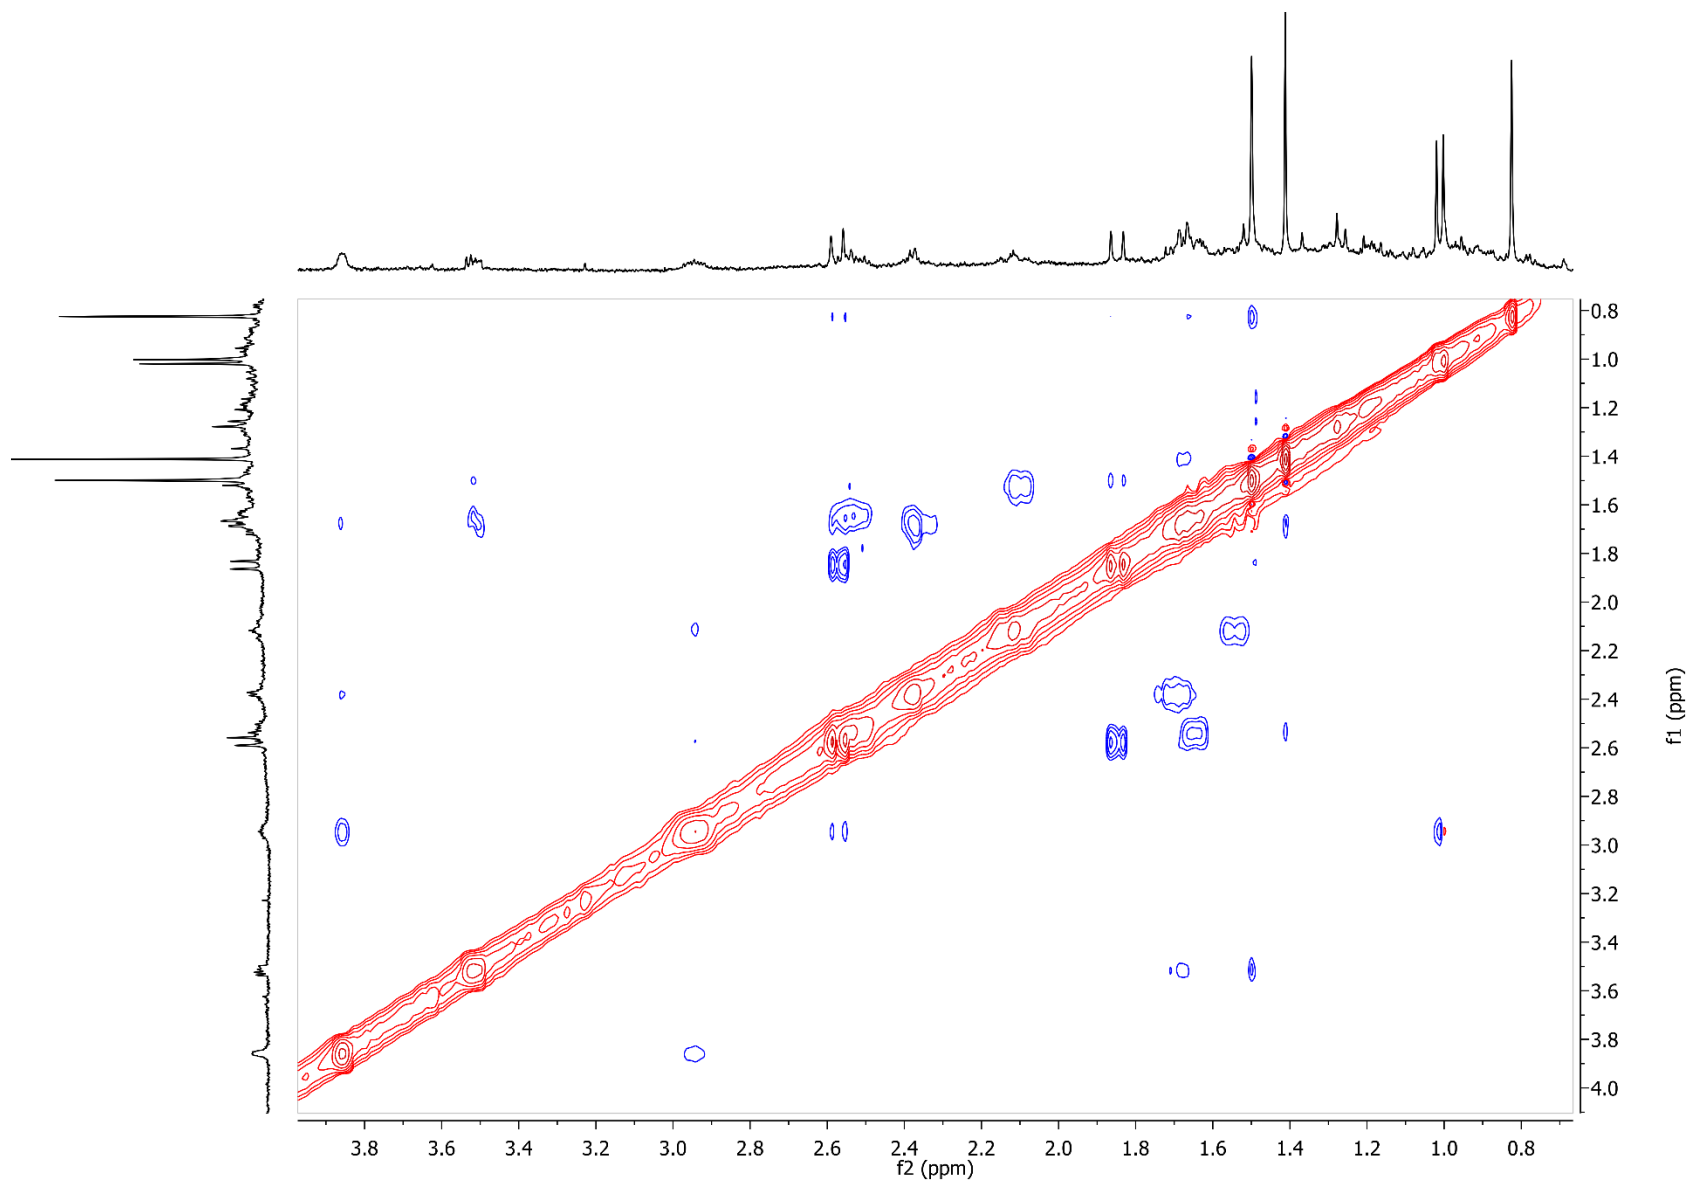

**Figure S57.** ESIMS/MS spectrum of compound **3** ( $[M+H]^+$ , positive ion mode)

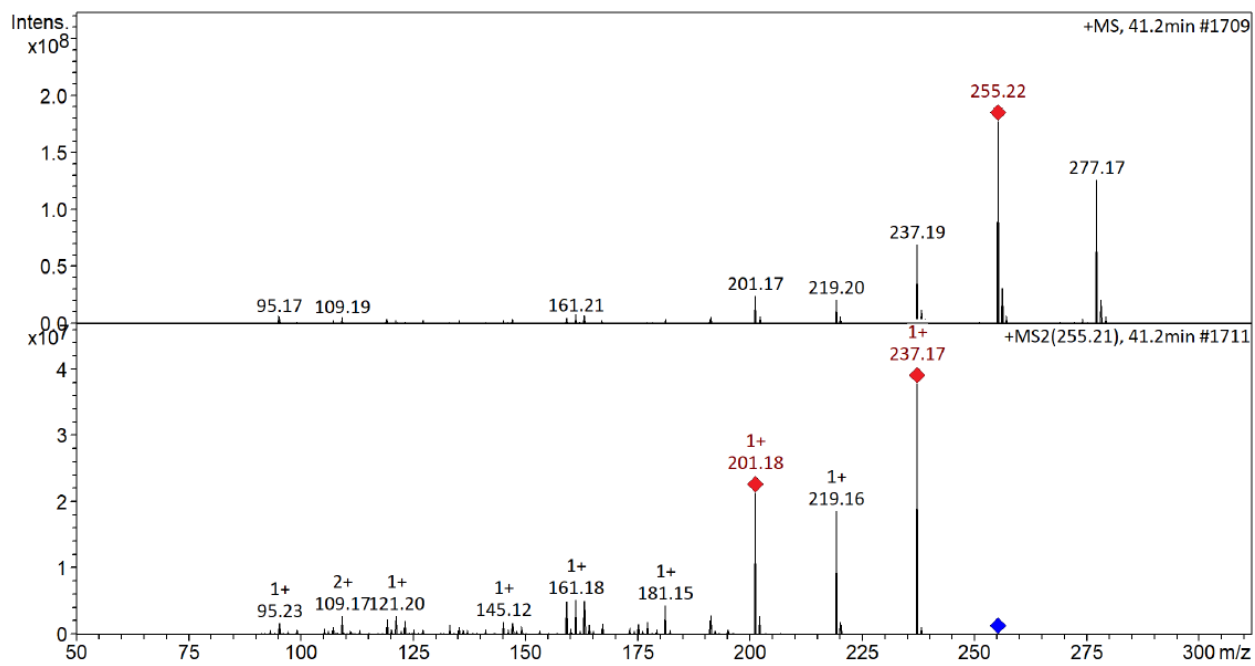

**Figure S58.** IR spectrum of compound **4**

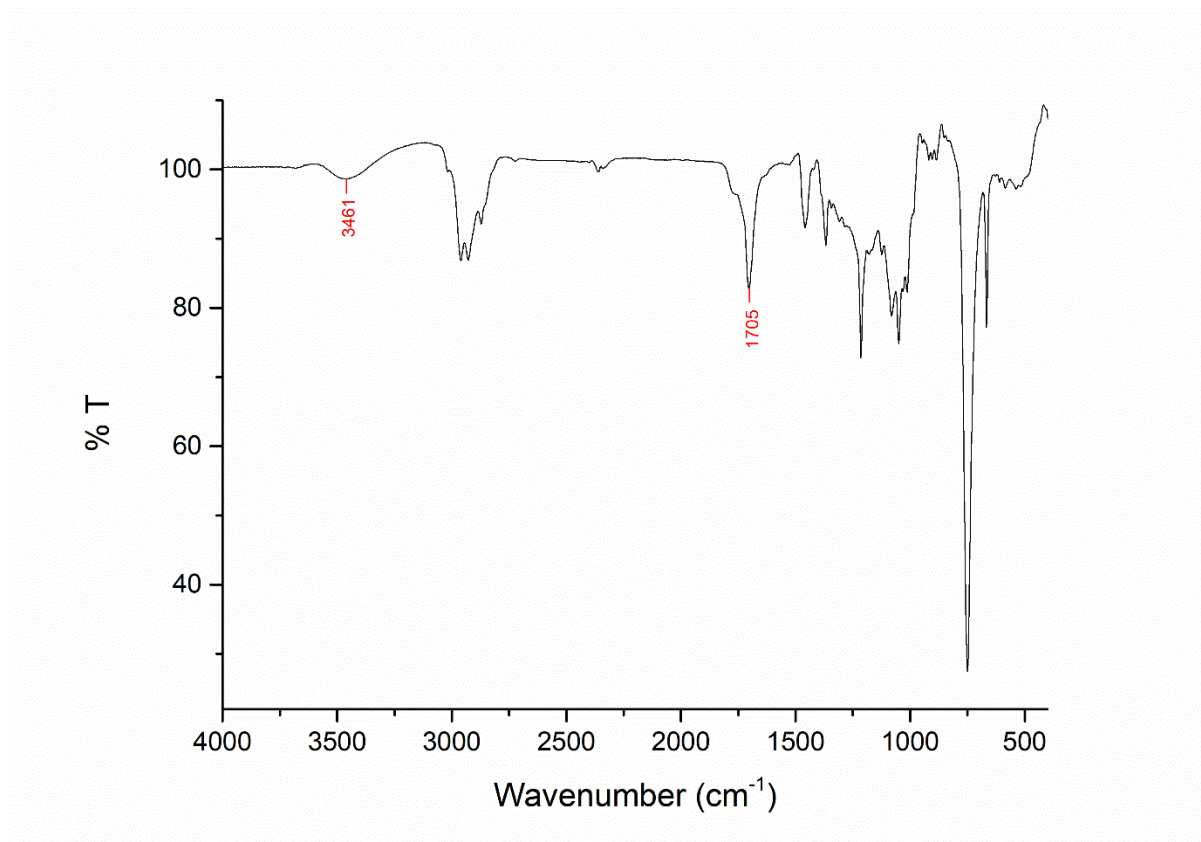

**Figure S59.** HRESIMS spectrum of compound **4** ([M + Na], positive ion mode)

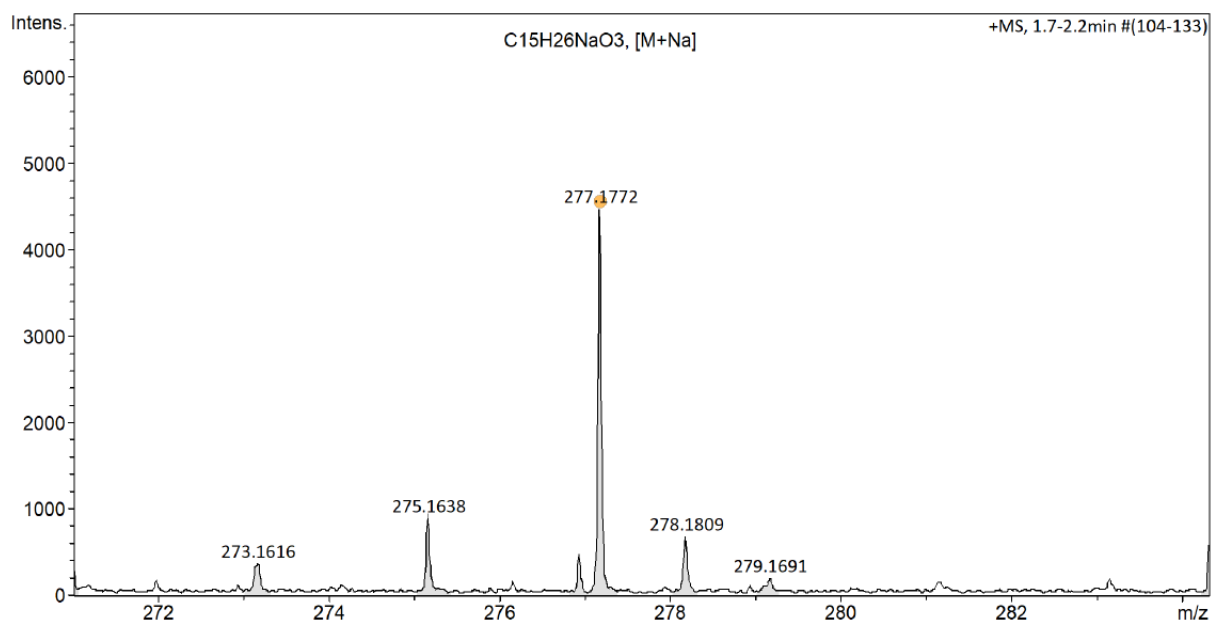

**Figure S60.**  $^1\text{H}$  NMR (400 MHz,  $\text{CDCl}_3$ ) spectrum of **4**

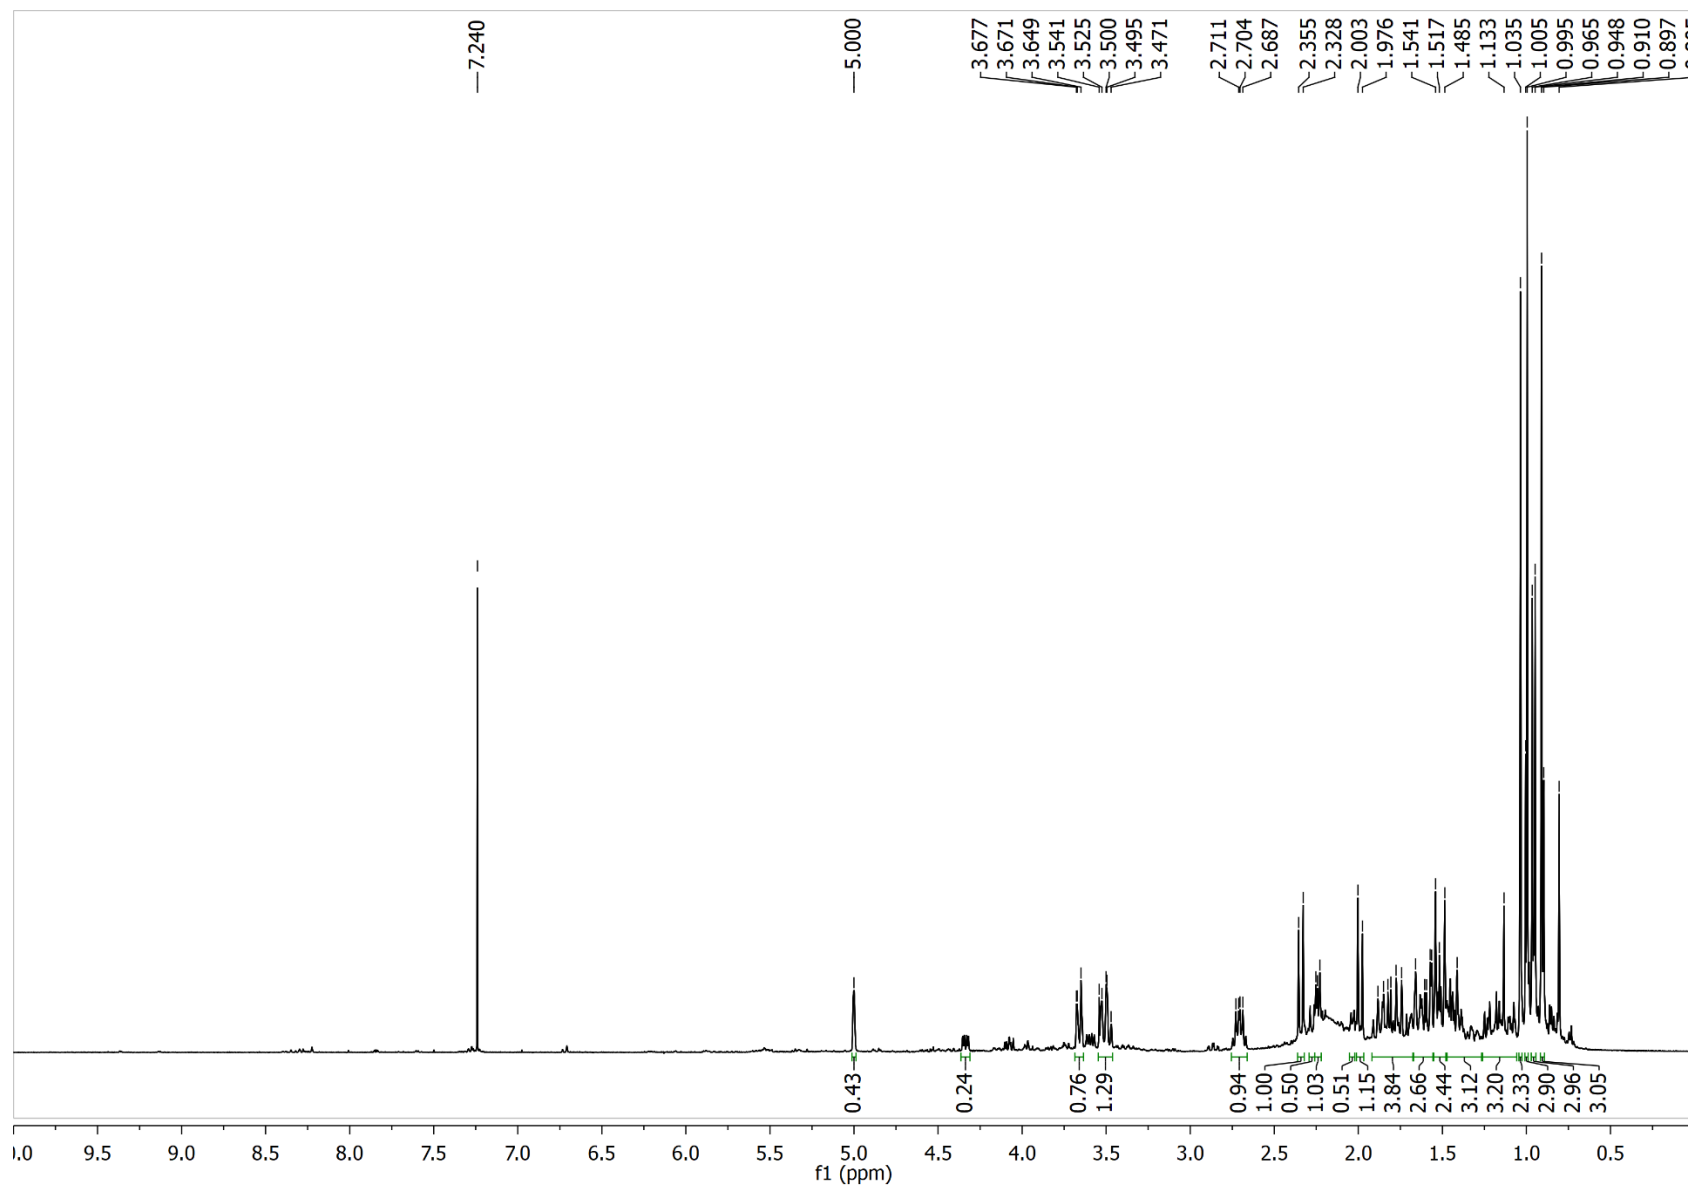

**Figure S61.**  $^1\text{H}$  NMR (400 MHz,  $\text{CDCl}_3$ ) extension spectrum of **4**

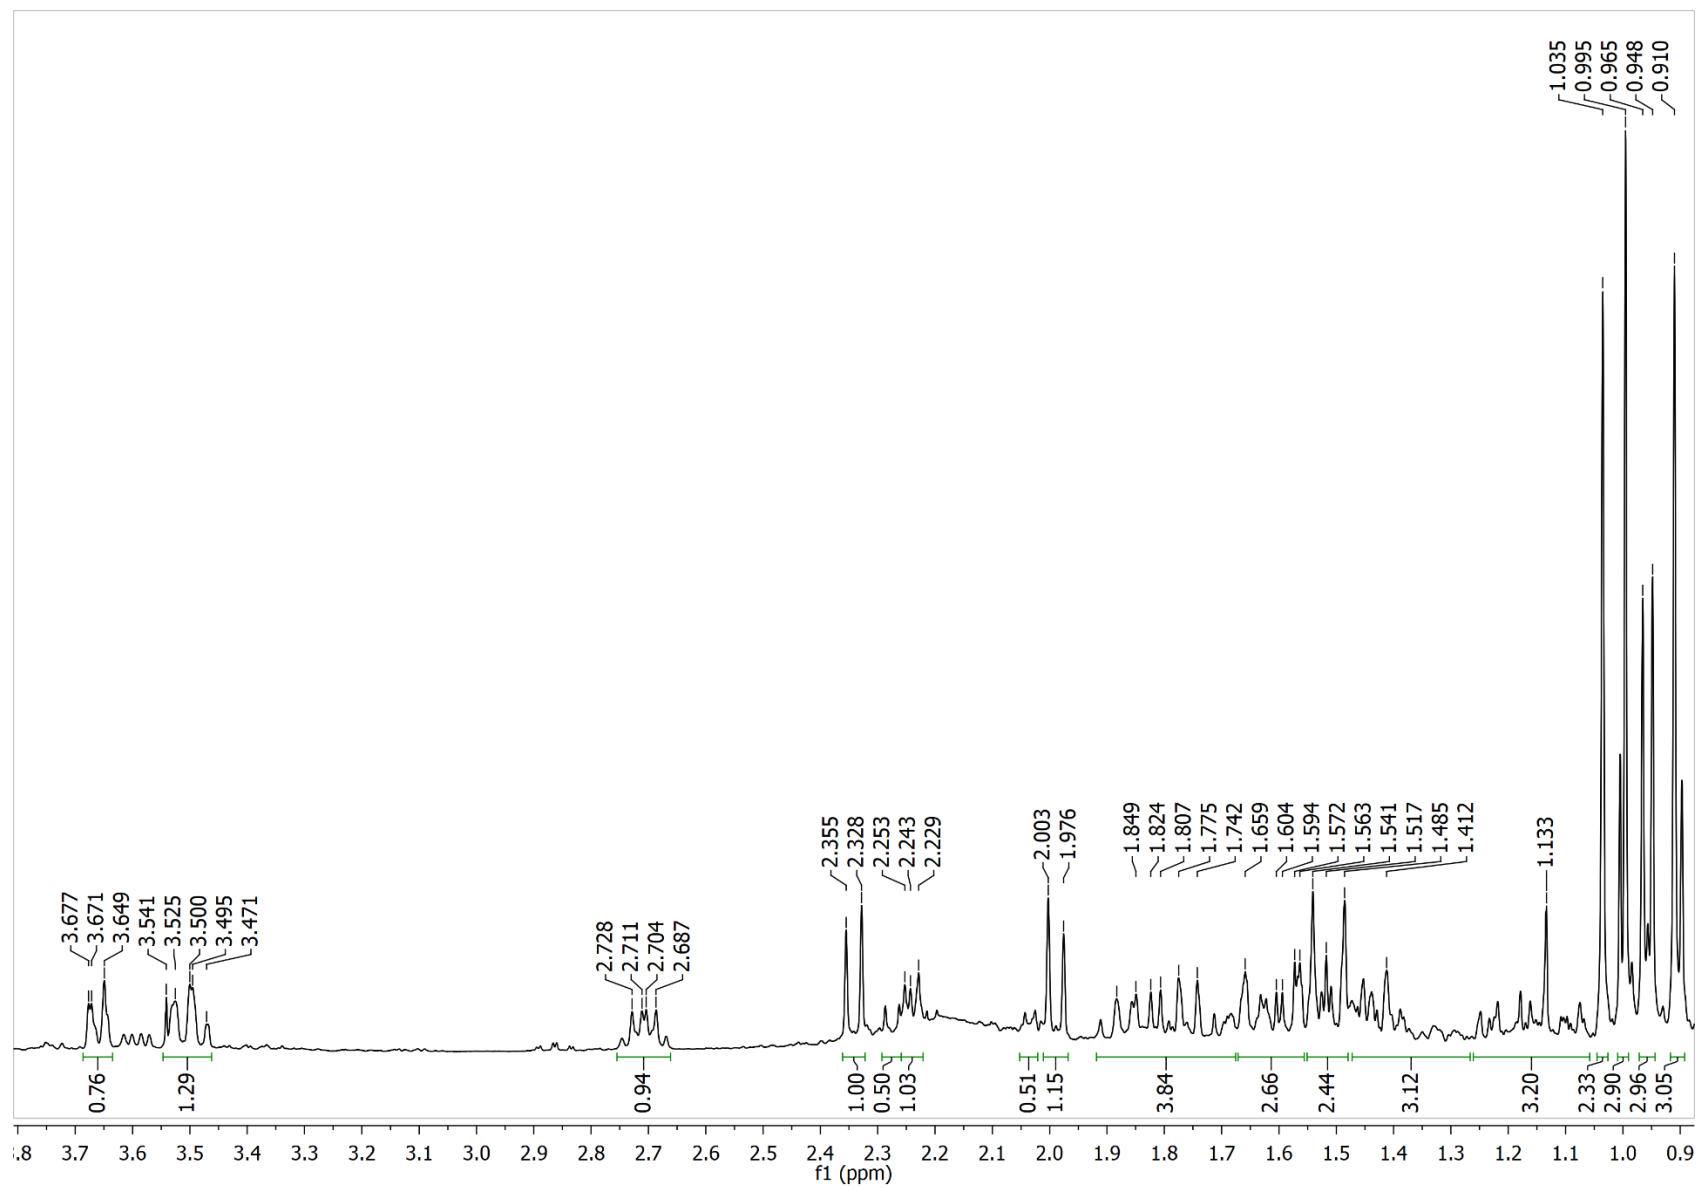

**Figure S62.**  $^{13}\text{C}$  NMR (100 MHz,  $\text{CDCl}_3$ ) spectrum of **4**

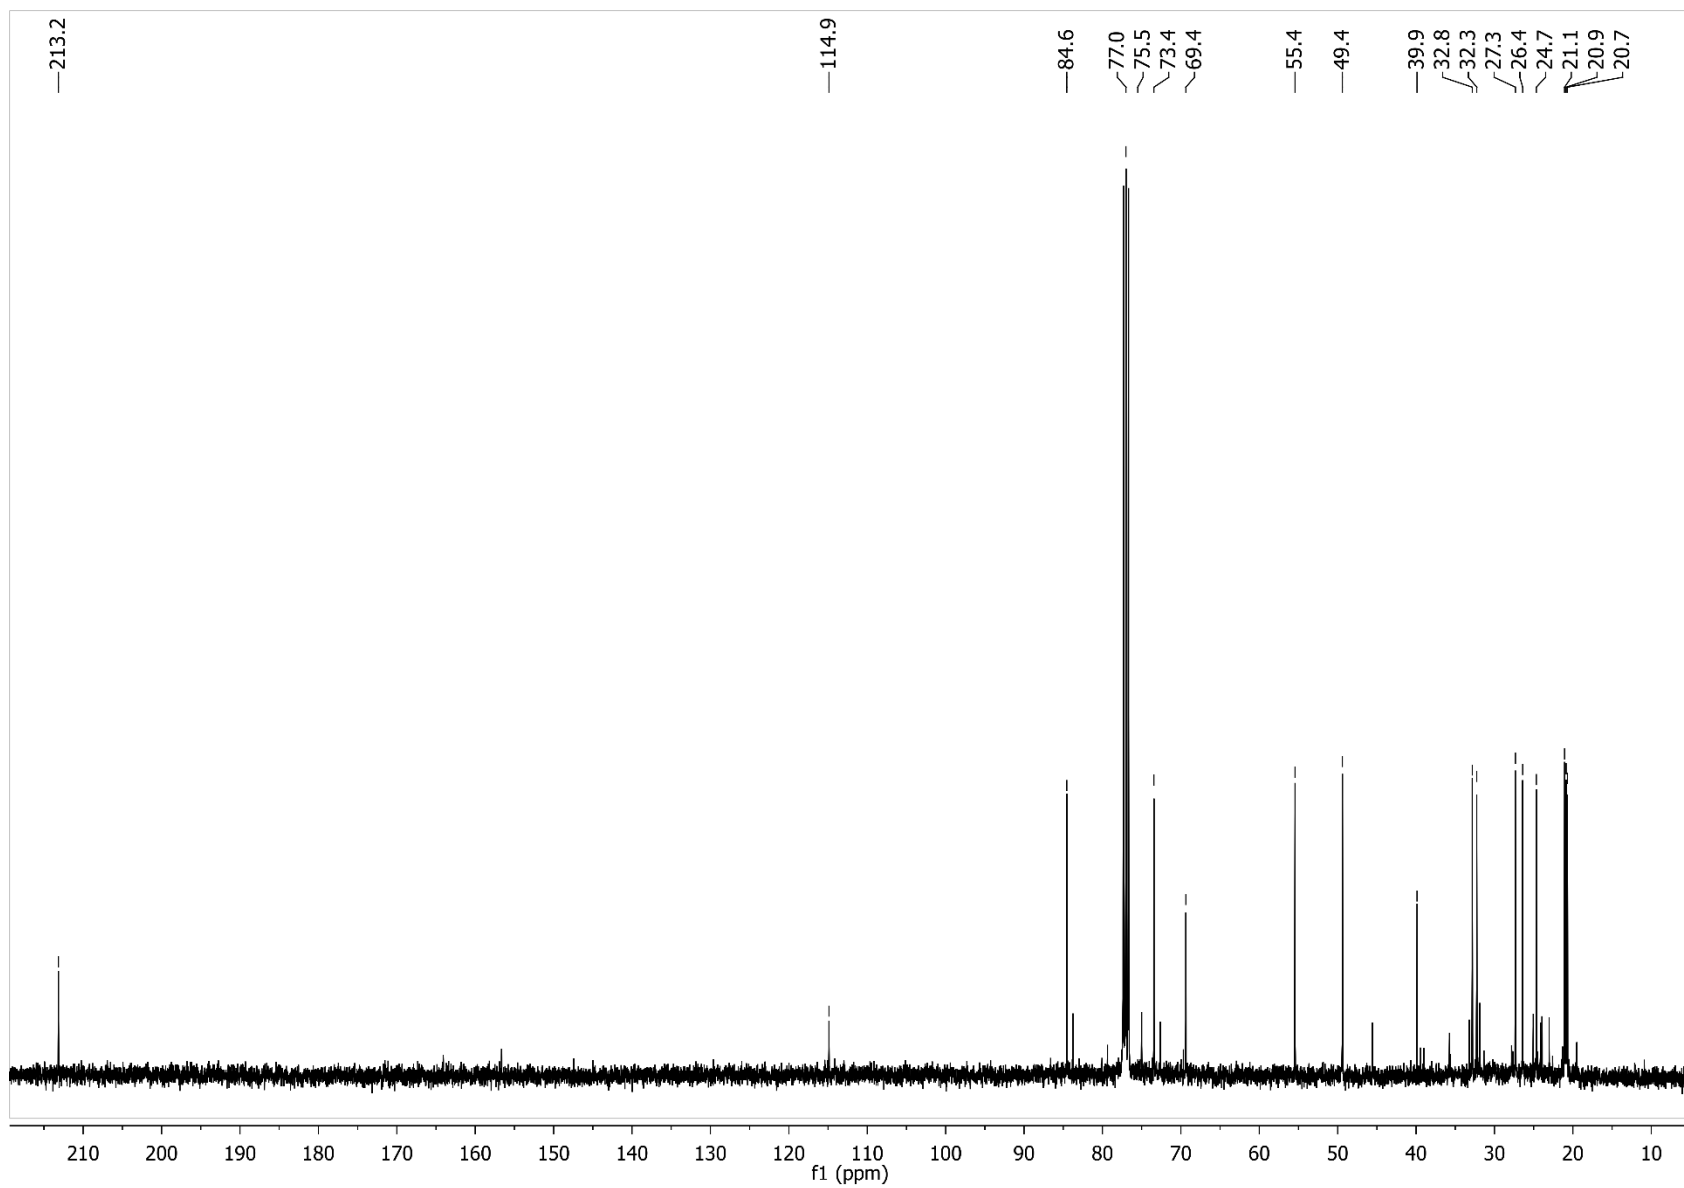



**Figure S63.**  $^{13}\text{C}$  DEPT-135 NMR (100 MHz,  $\text{CDCl}_3$ ) spectrum of **4**

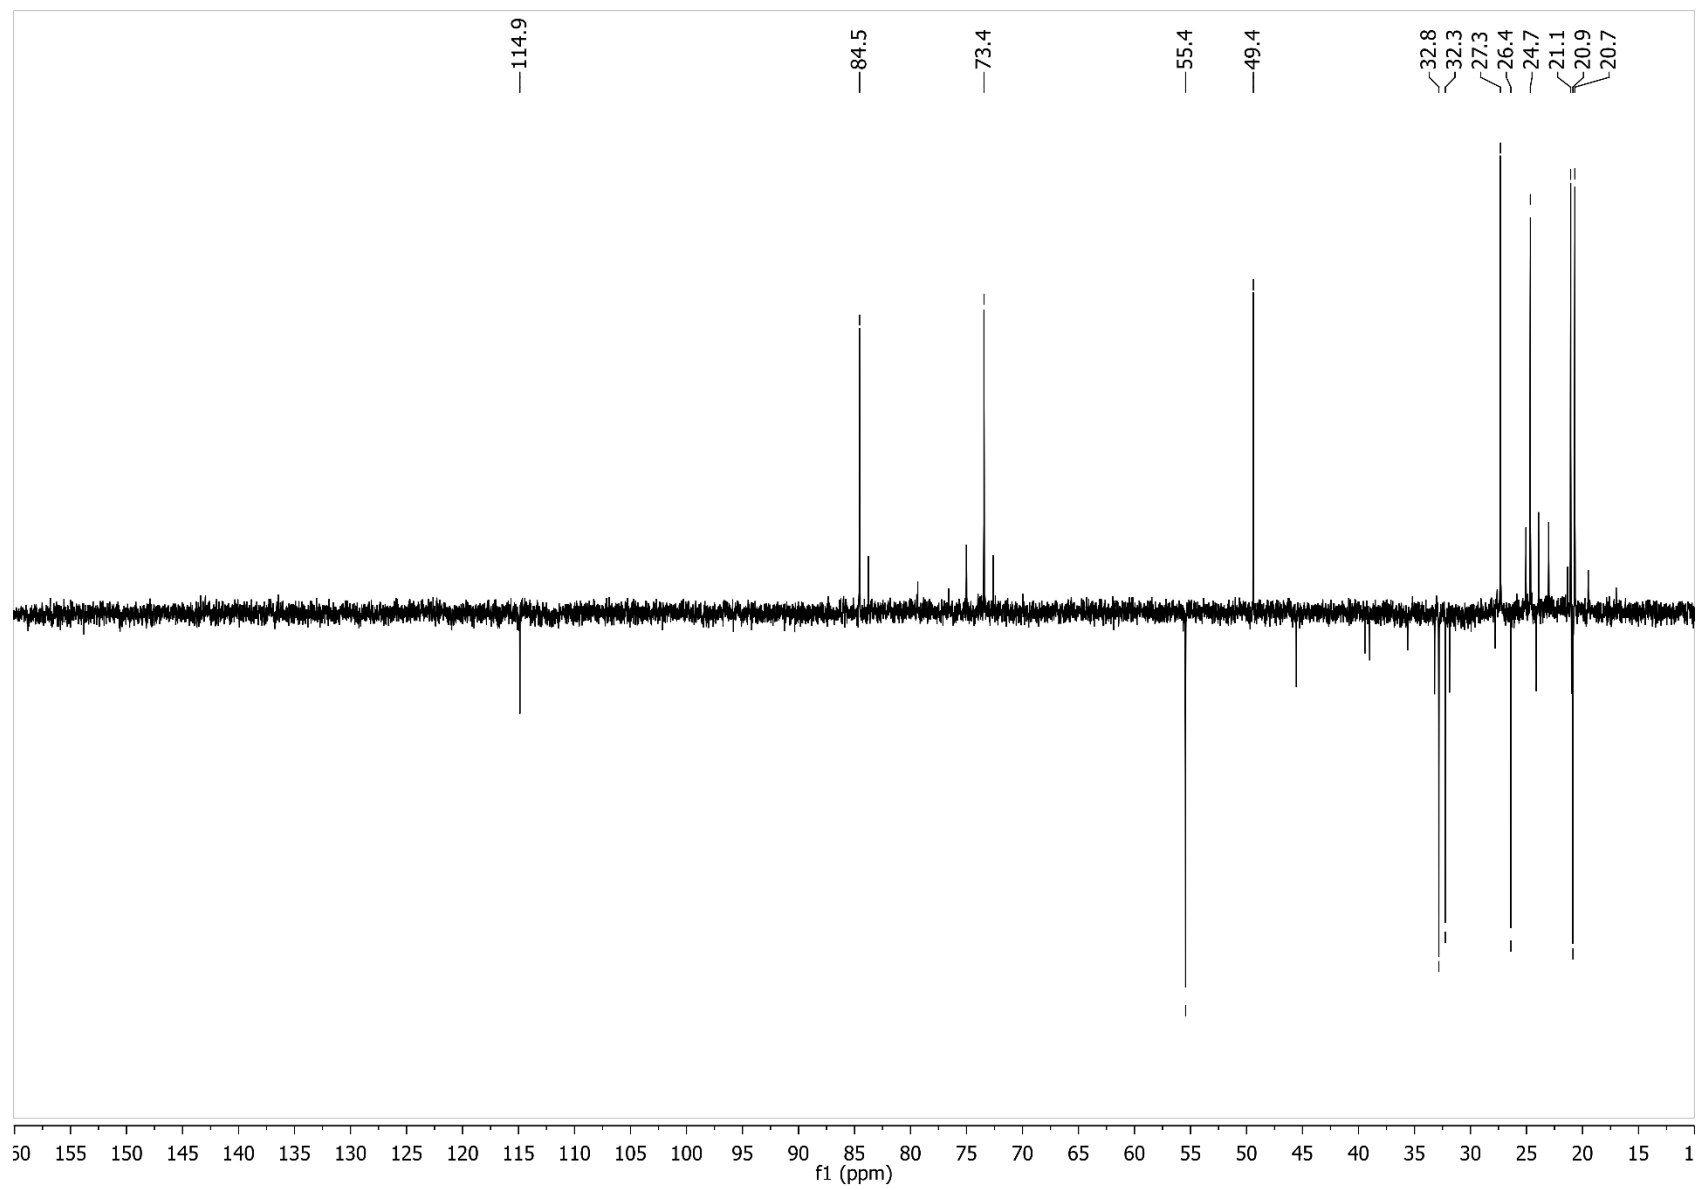

**Figure S64.** HSQC NMR (400 MHz, CDCl<sub>3</sub>) spectrum of **4**

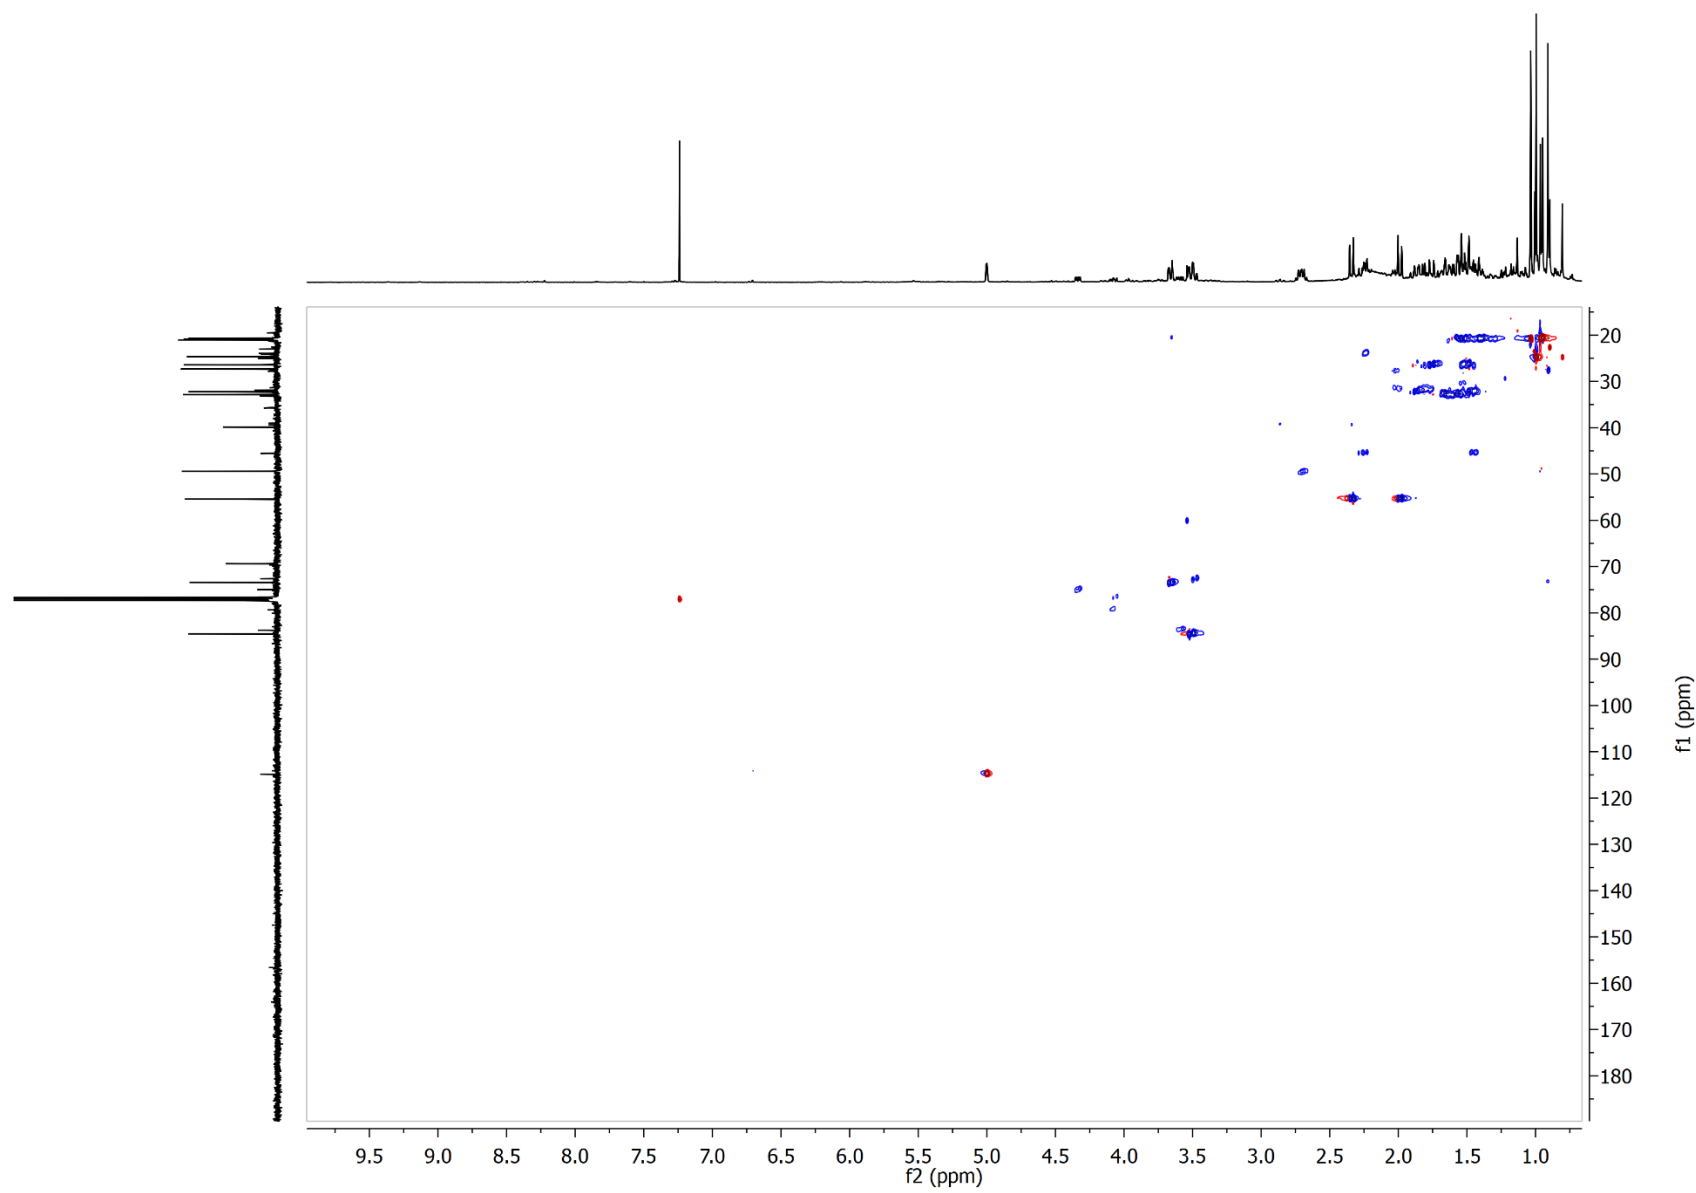

**Figure S65.** HSQC NMR (400 MHz, CDCl<sub>3</sub>) extension spectrum of **4**

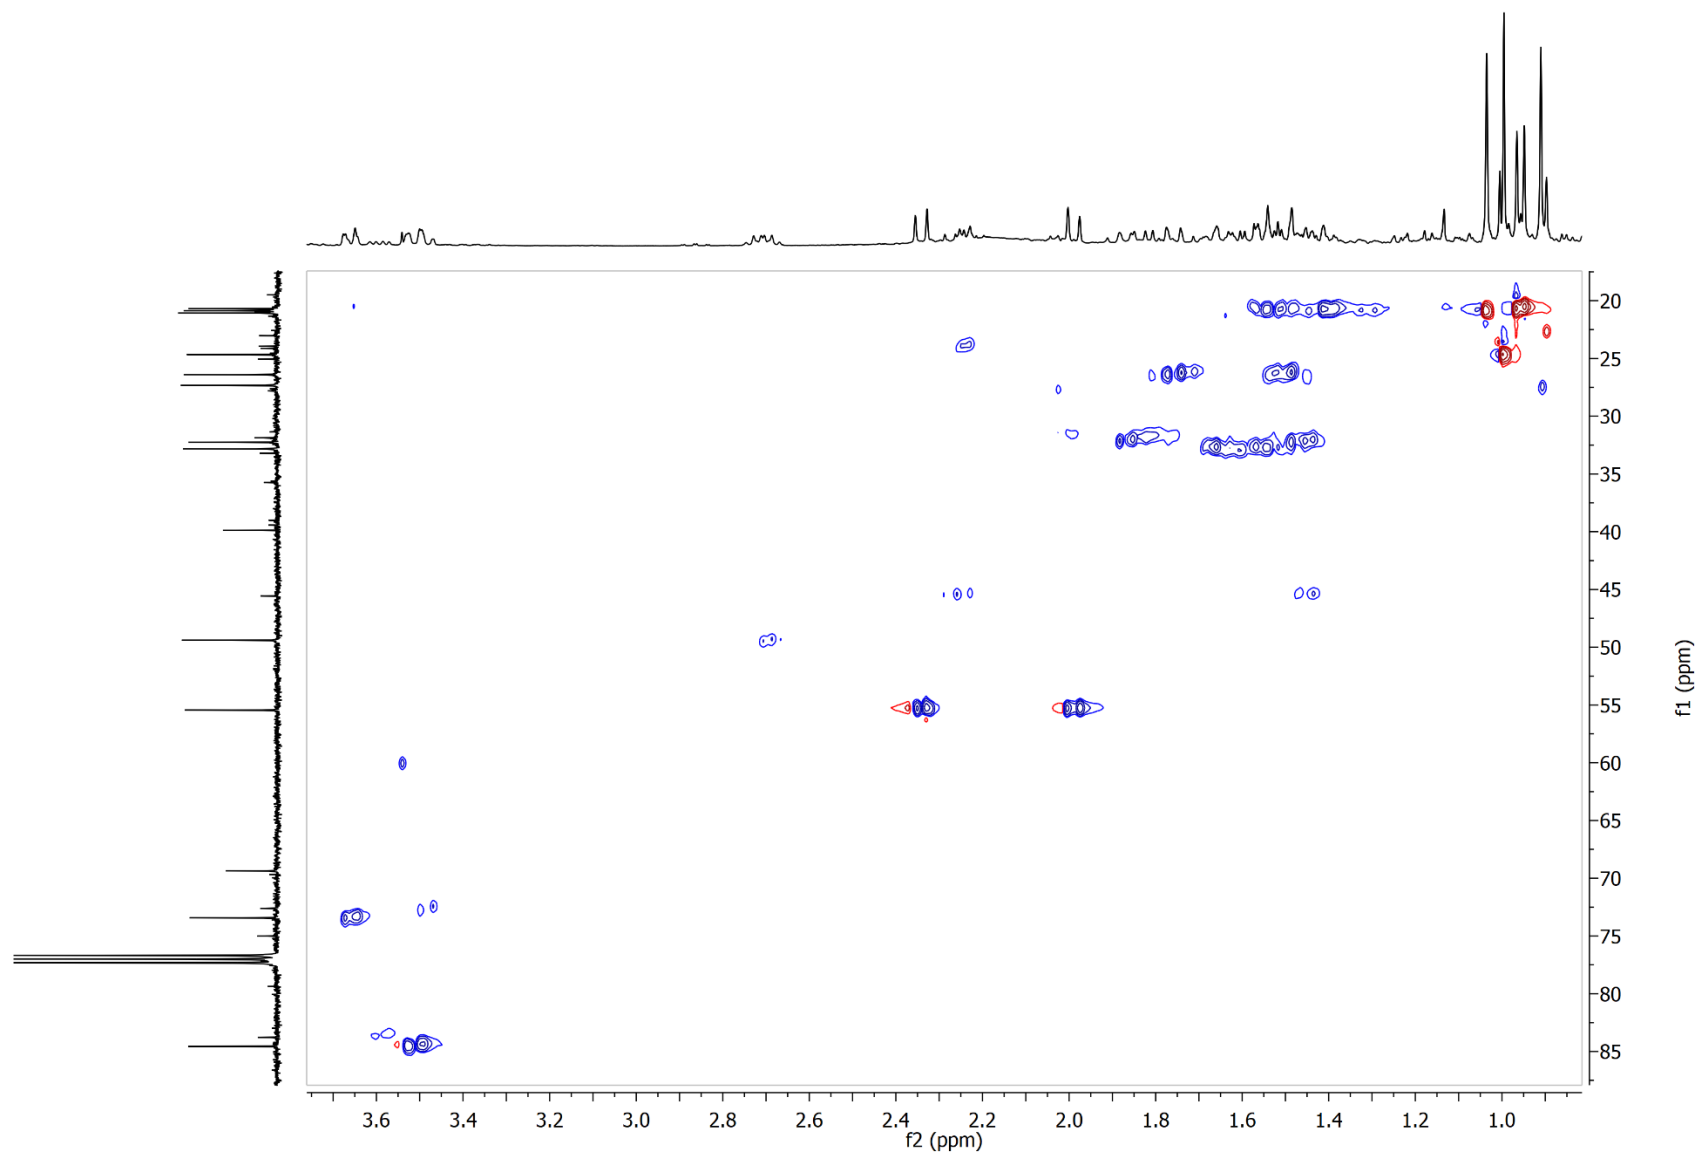

**Figure S66.** HMBC NMR (400 MHz, CDCl<sub>3</sub>) spectrum of **4**

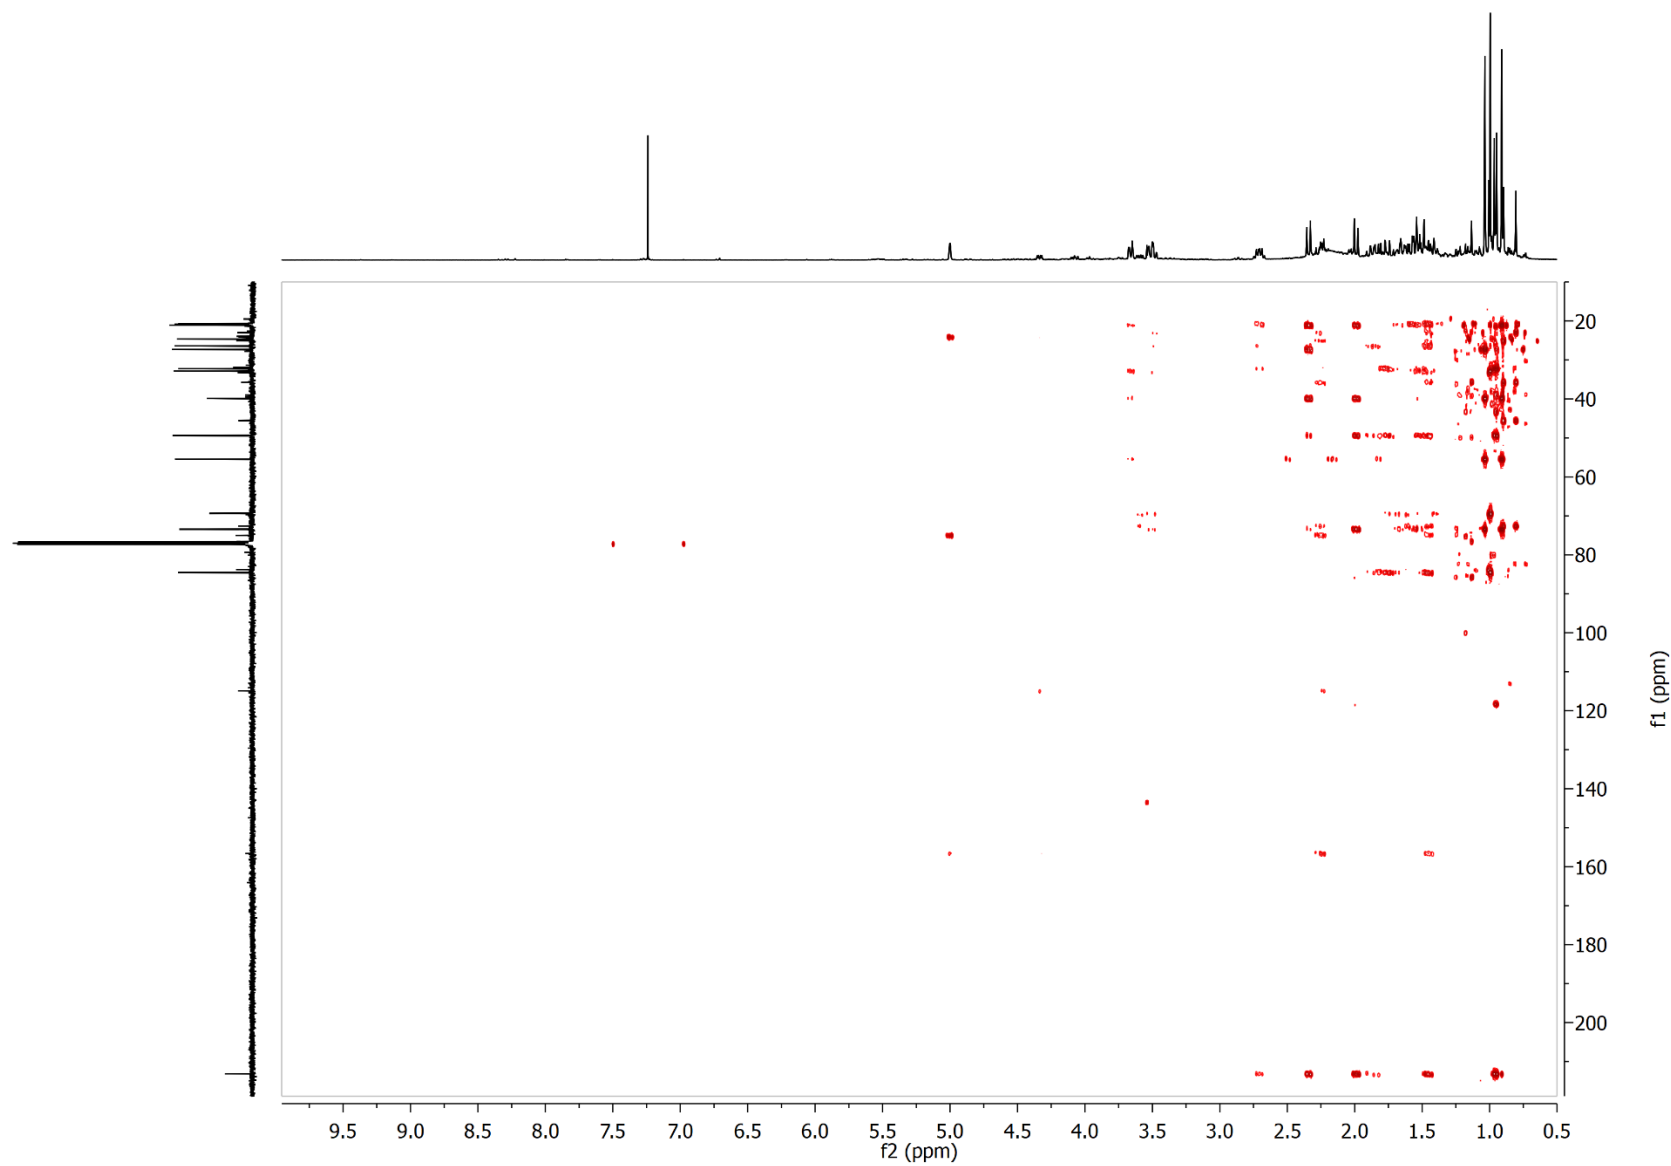

**Figure S67.** HMBC NMR (400 MHz, CDCl<sub>3</sub>) extension spectrum of **4**

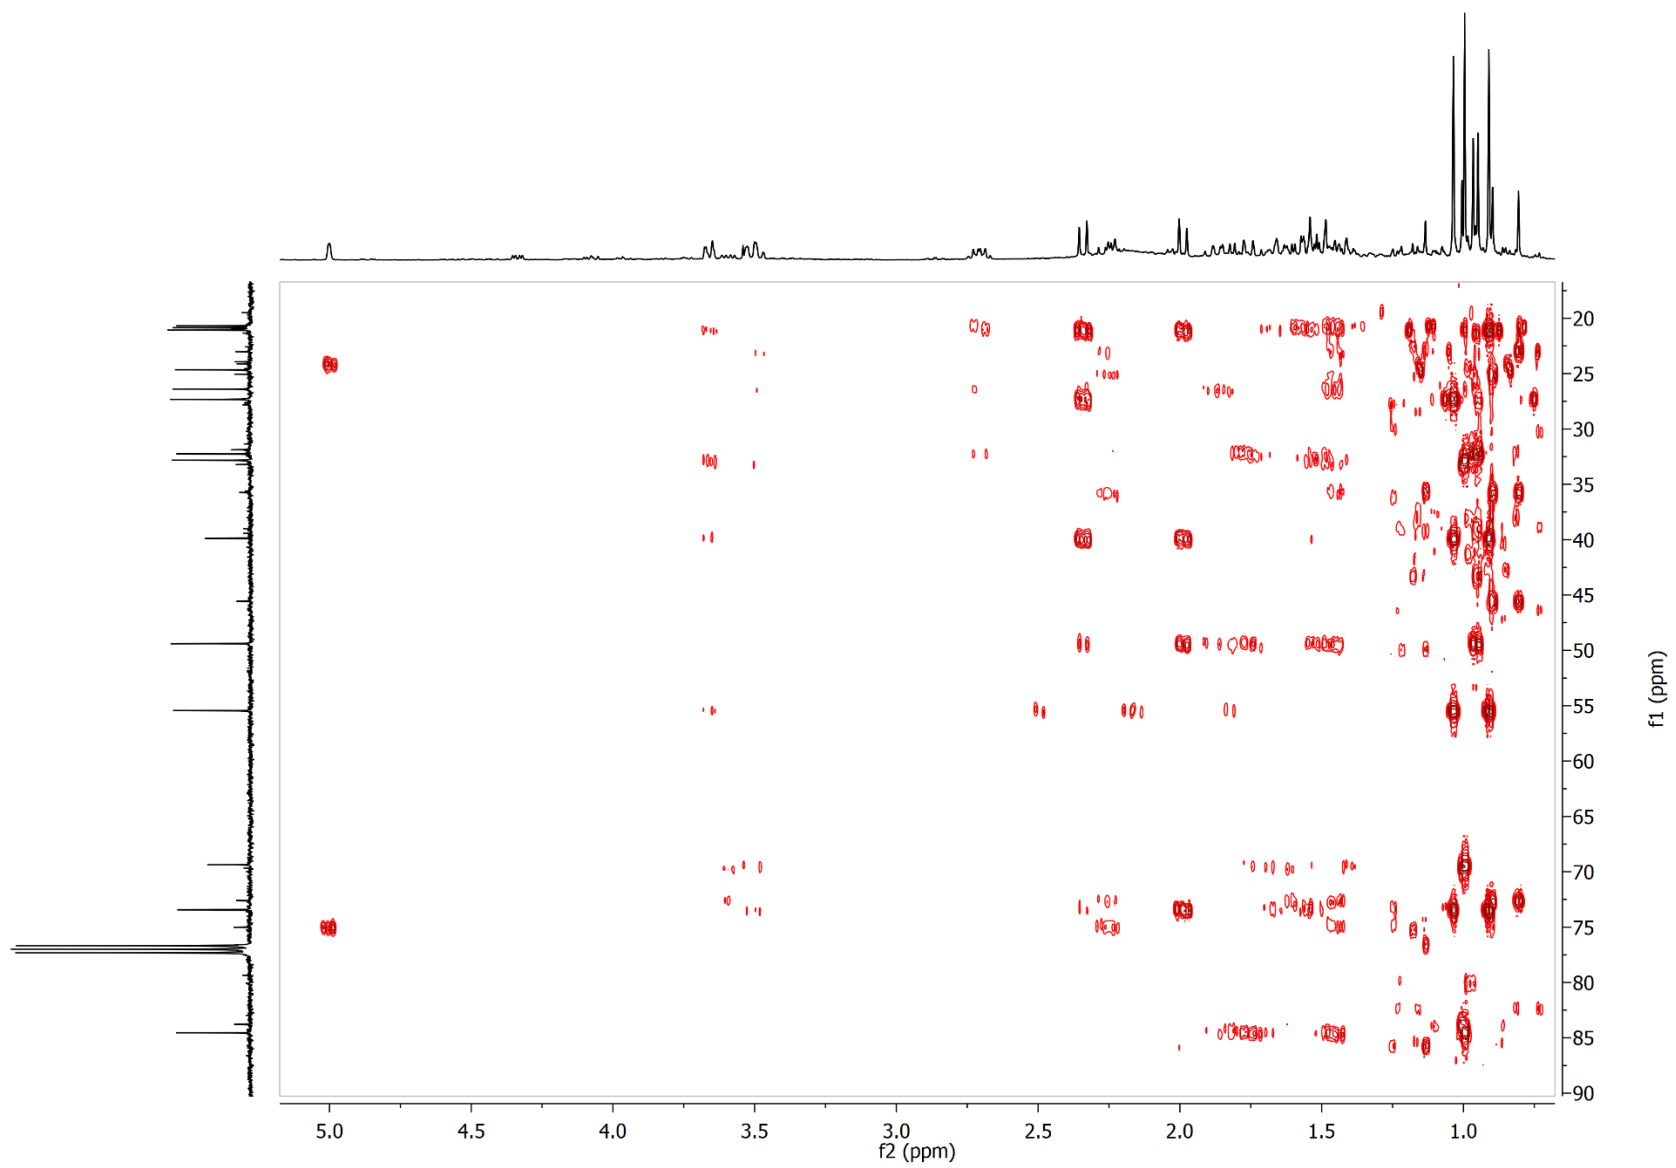

**Figure S68.**  $^1\text{H}$ - $^1\text{H}$  COSY NMR (400 MHz,  $\text{CDCl}_3$ ) spectrum of **4**

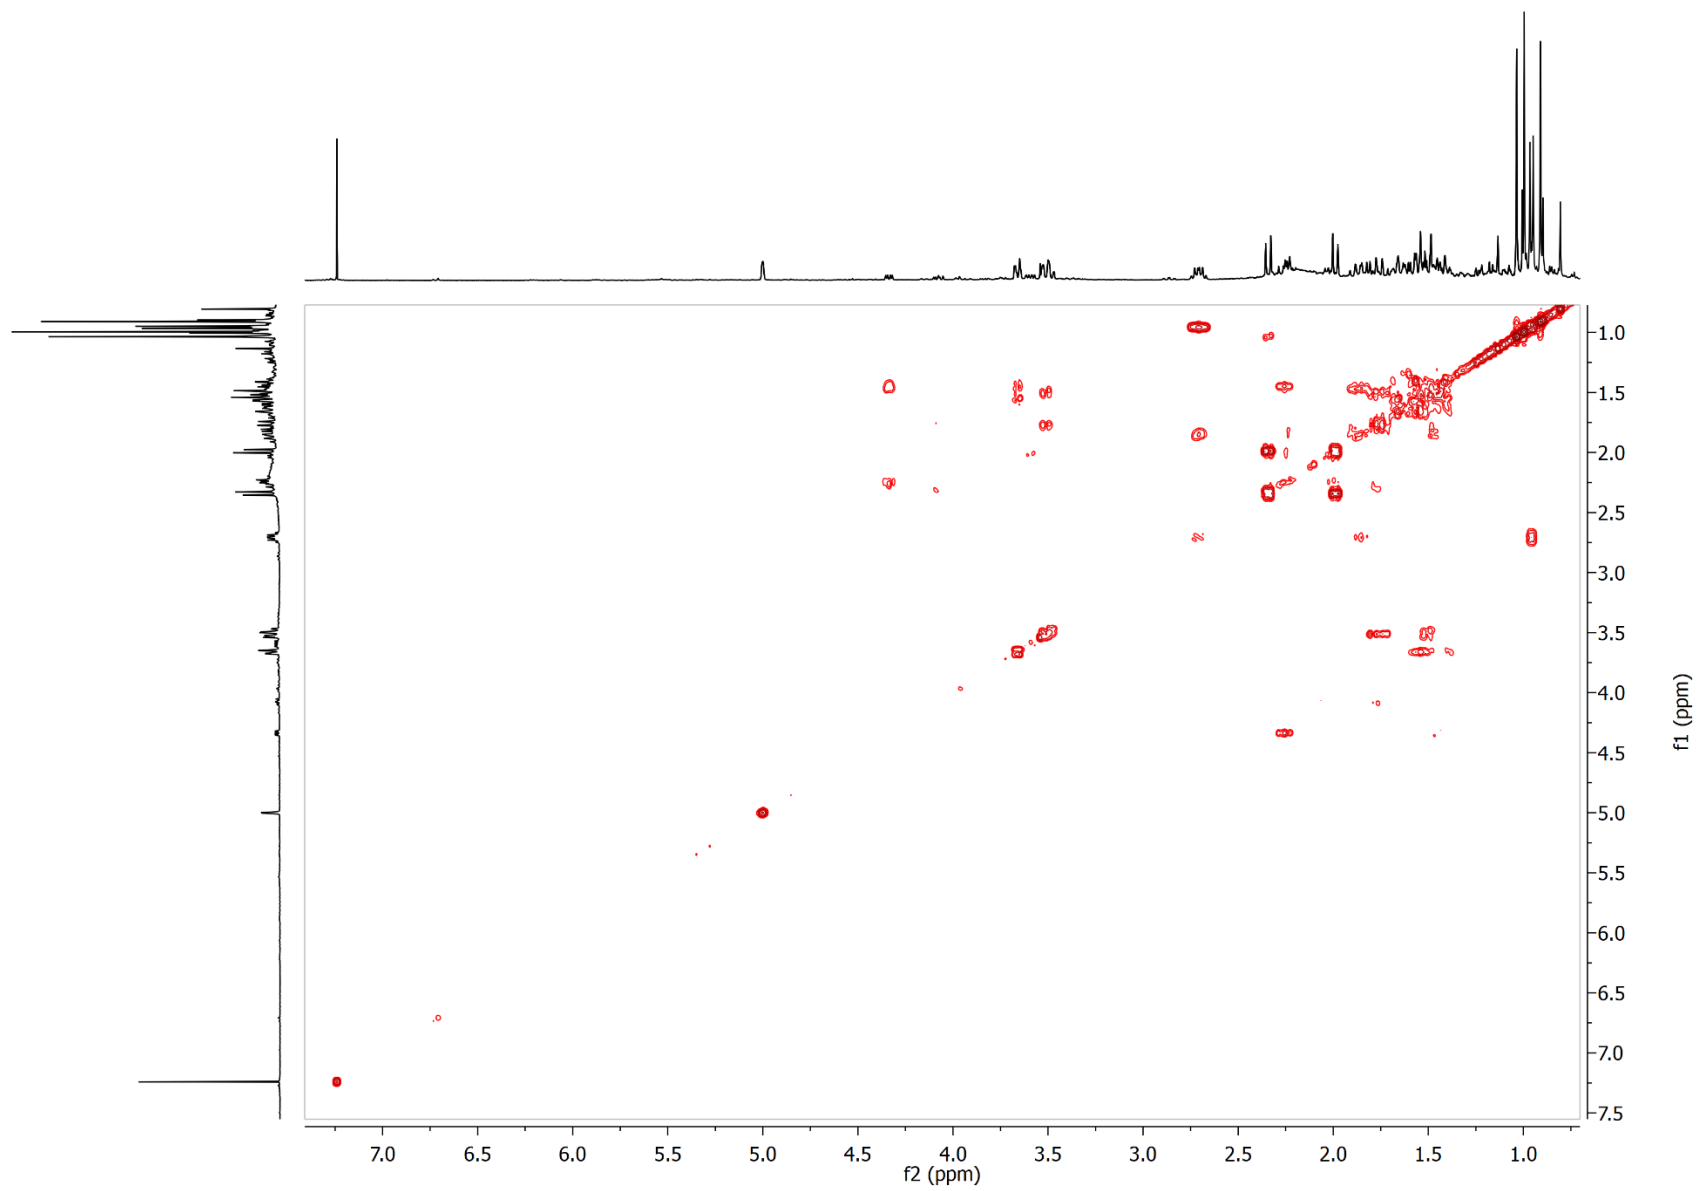

**Figure S69.**  $^1\text{H}$ - $^1\text{H}$  NOESY NMR (400 MHz,  $\text{CDCl}_3$ ) spectrum of **4**

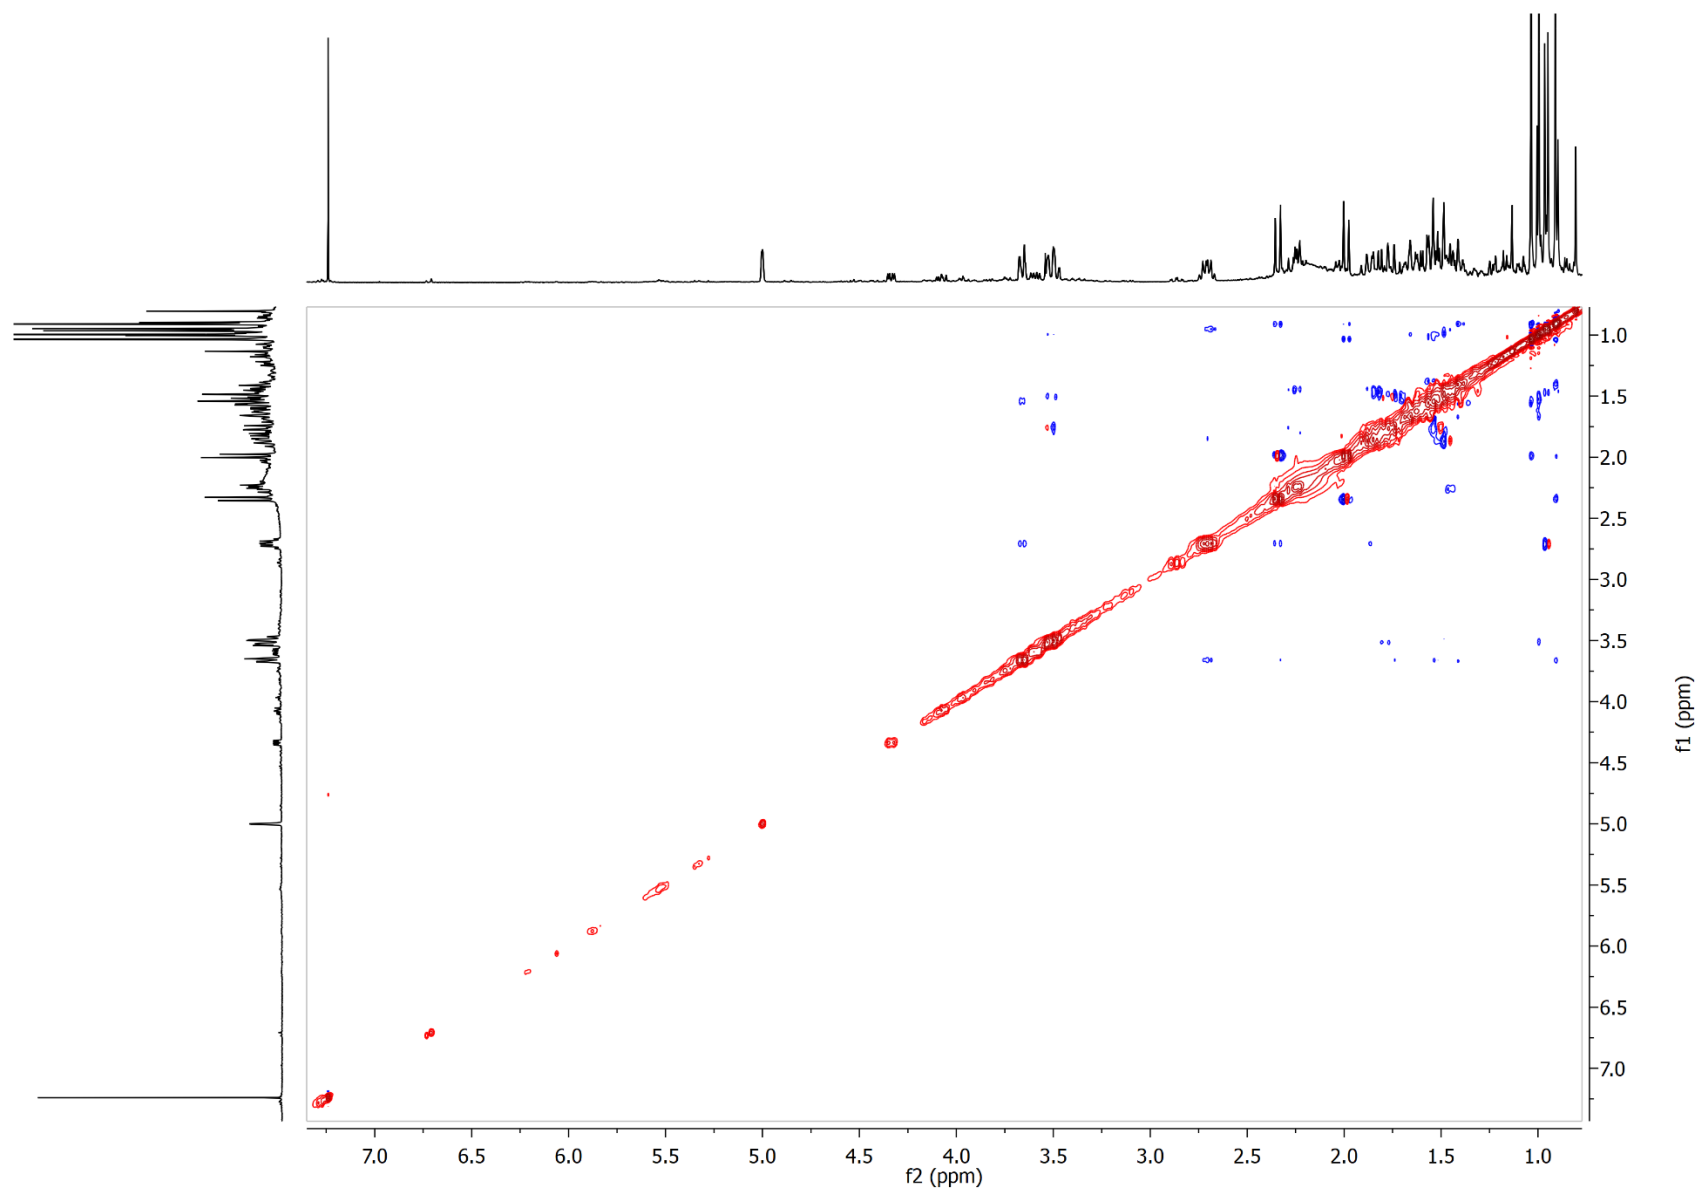

**Figure S70.**  $^1\text{H}$ - $^1\text{H}$  NOESY NMR (400 MHz,  $\text{CDCl}_3$ ) extension spectrum of **4**

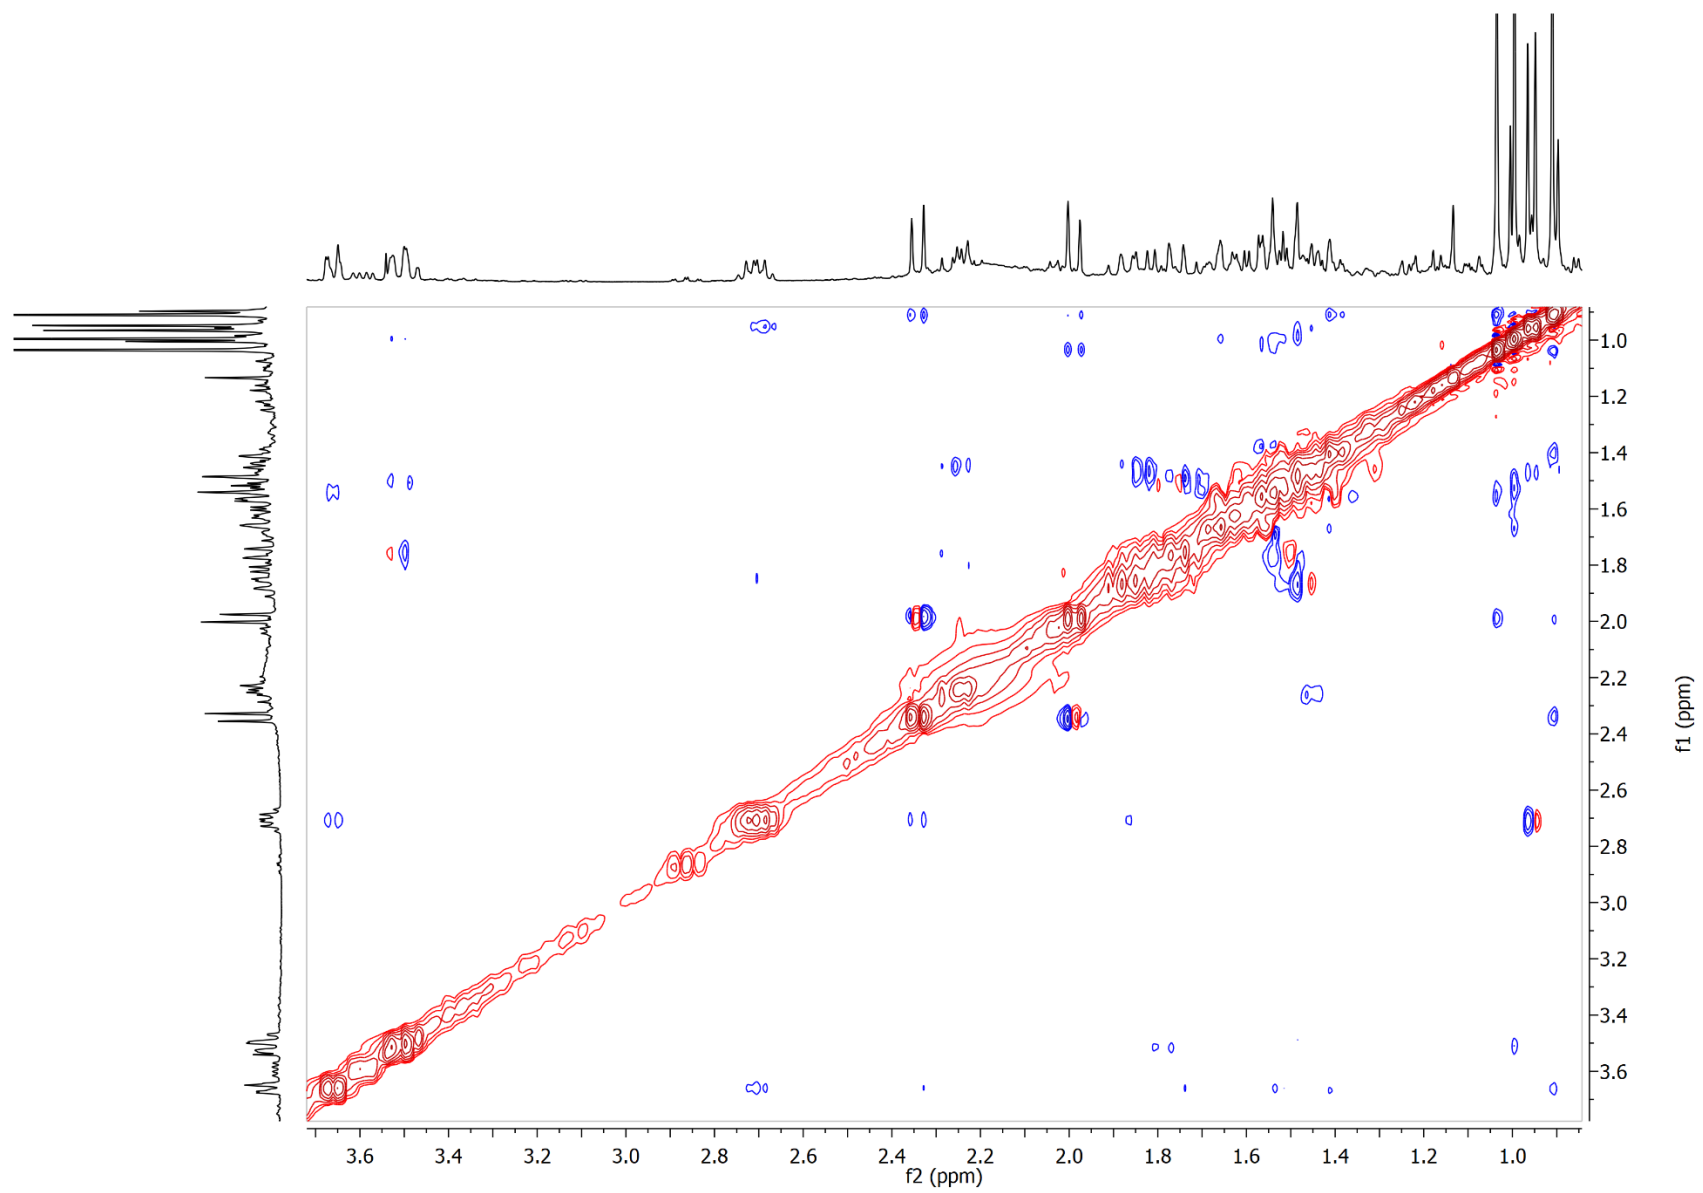



**Figure S71.** ESIMS/MS spectrum of compound **4** ( $[M + H]^+$ , positive ion mode)

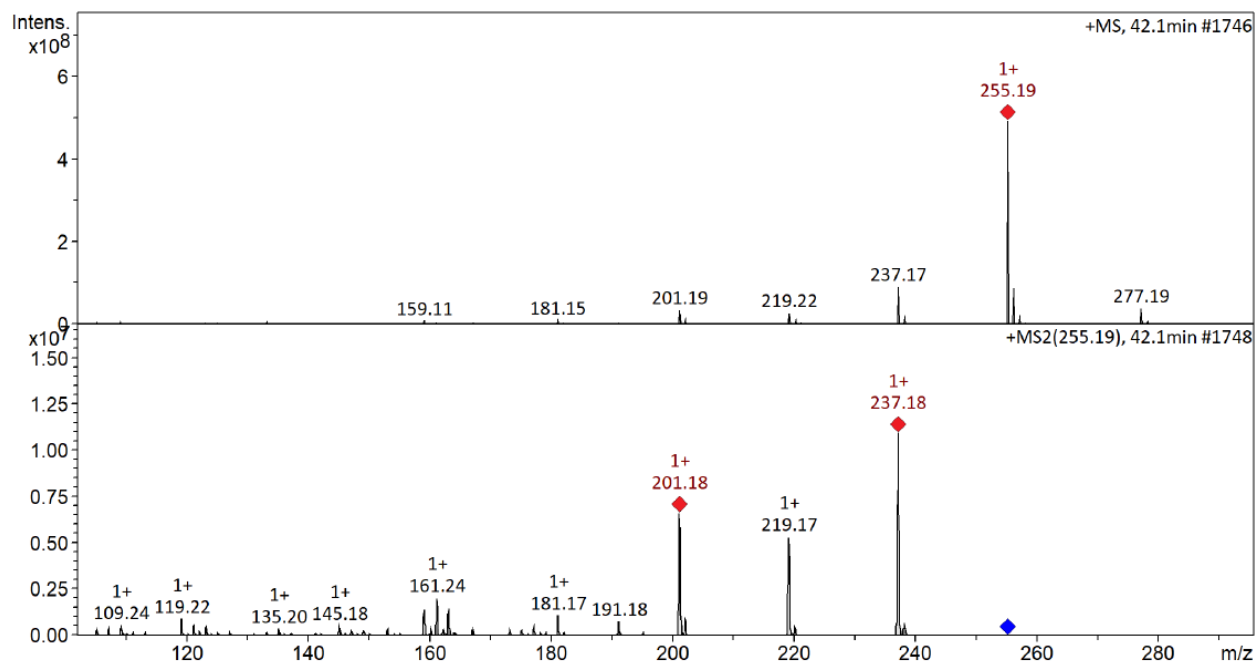

**Figure S72.** IR spectrum of compound **5**

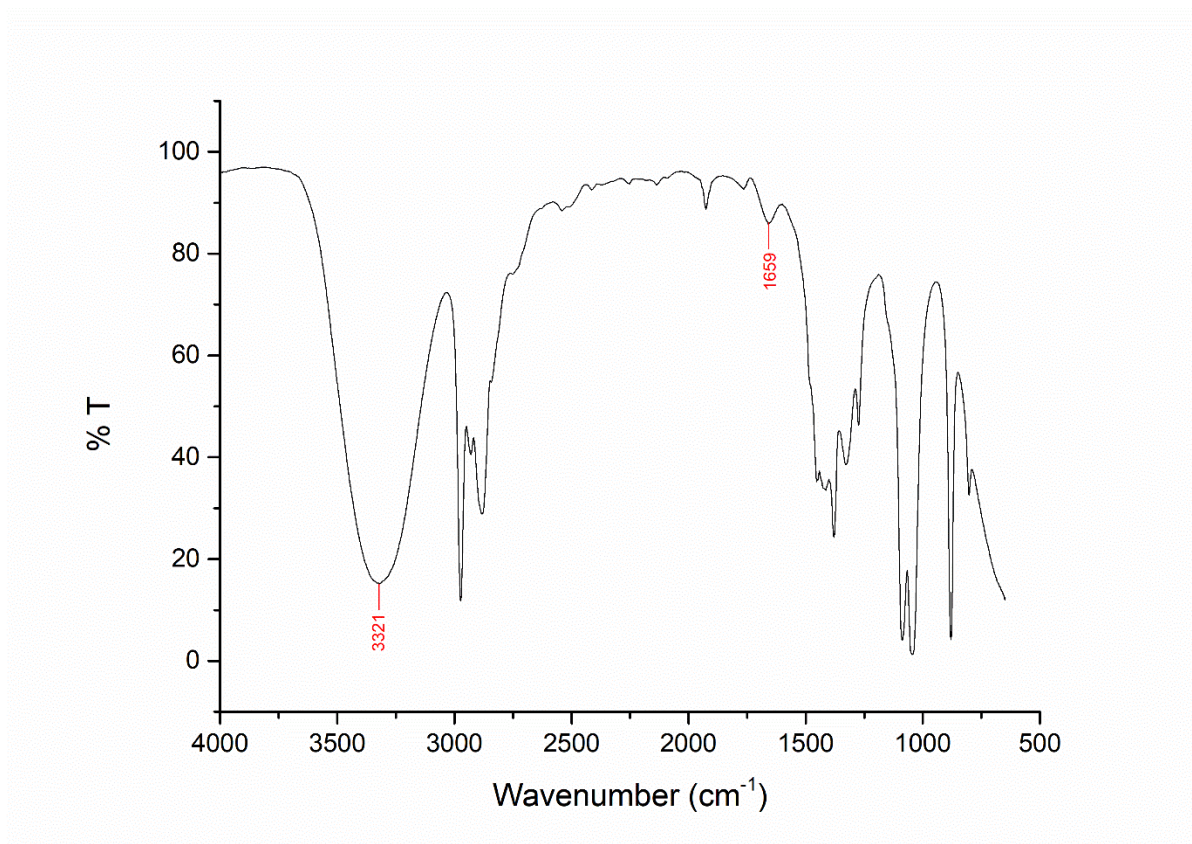

**Figure S73.** HRESIMS spectrum of compound **5** ([M + Na], positive ion mode)

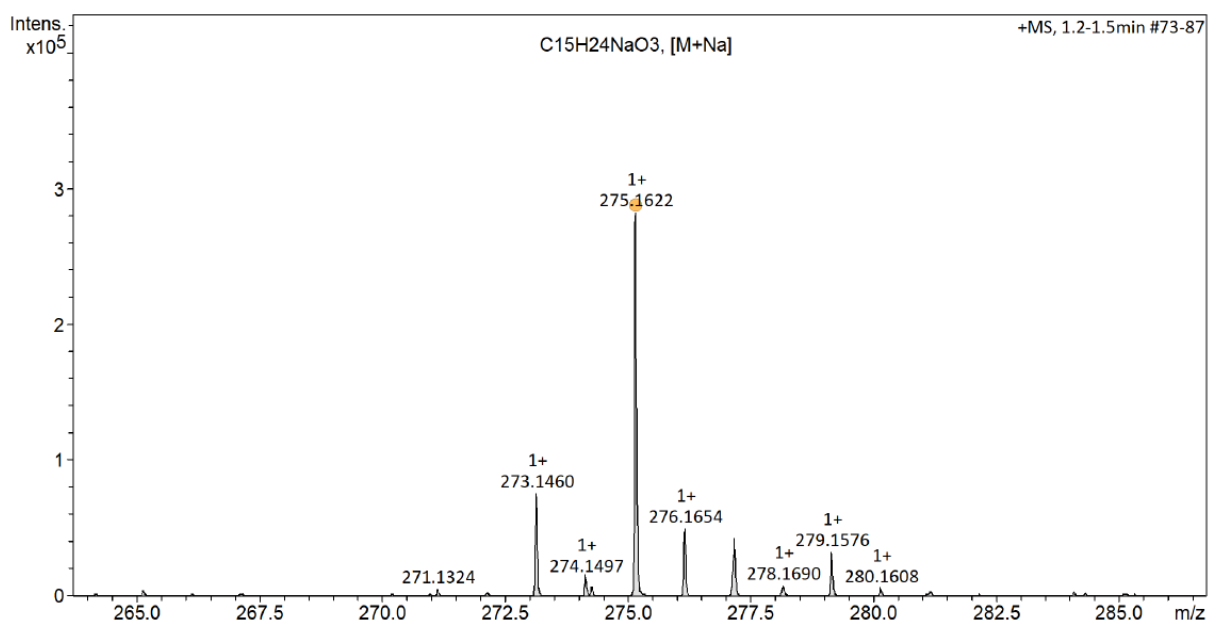

**Figure S74.**  $^1\text{H}$  NMR (400 MHz,  $\text{CDCl}_3$ ) spectrum of **5**

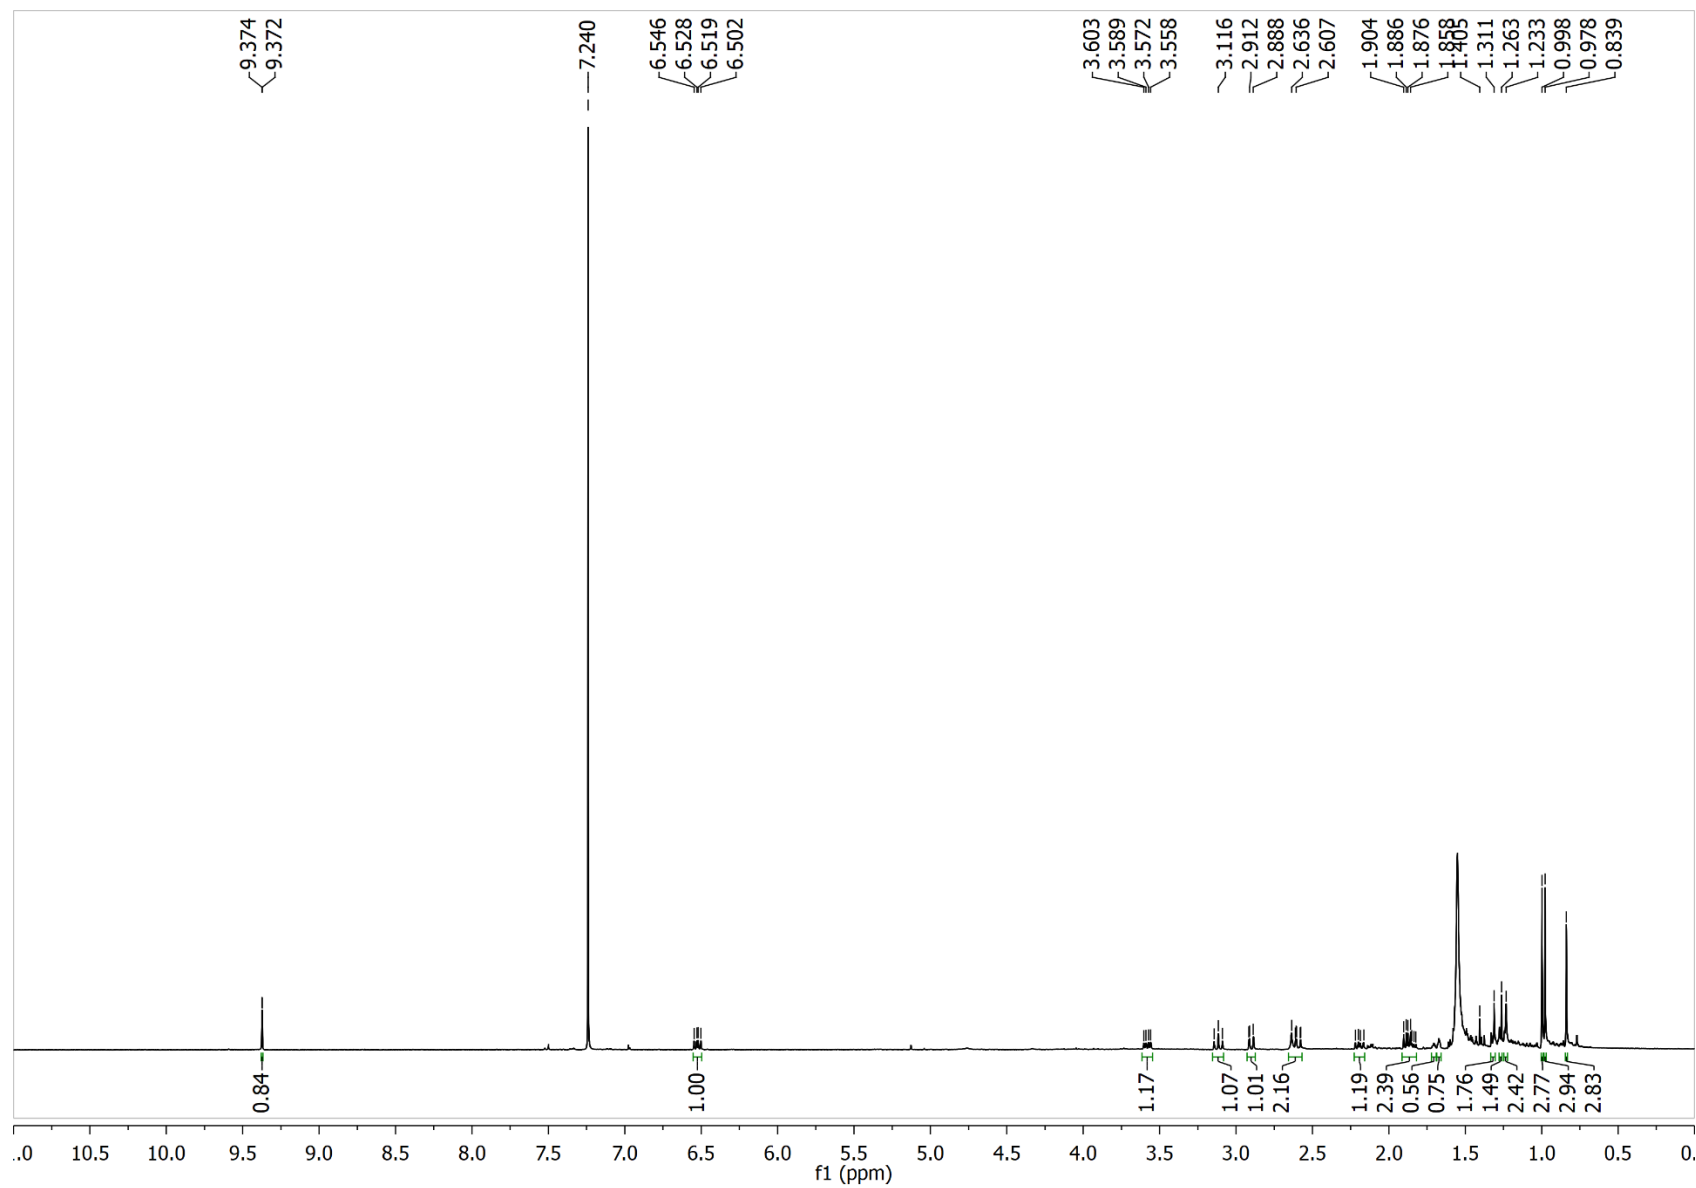

**Figure S75.**  $^1\text{H}$  NMR (400 MHz,  $\text{CDCl}_3$ ) extension spectrum of **5**

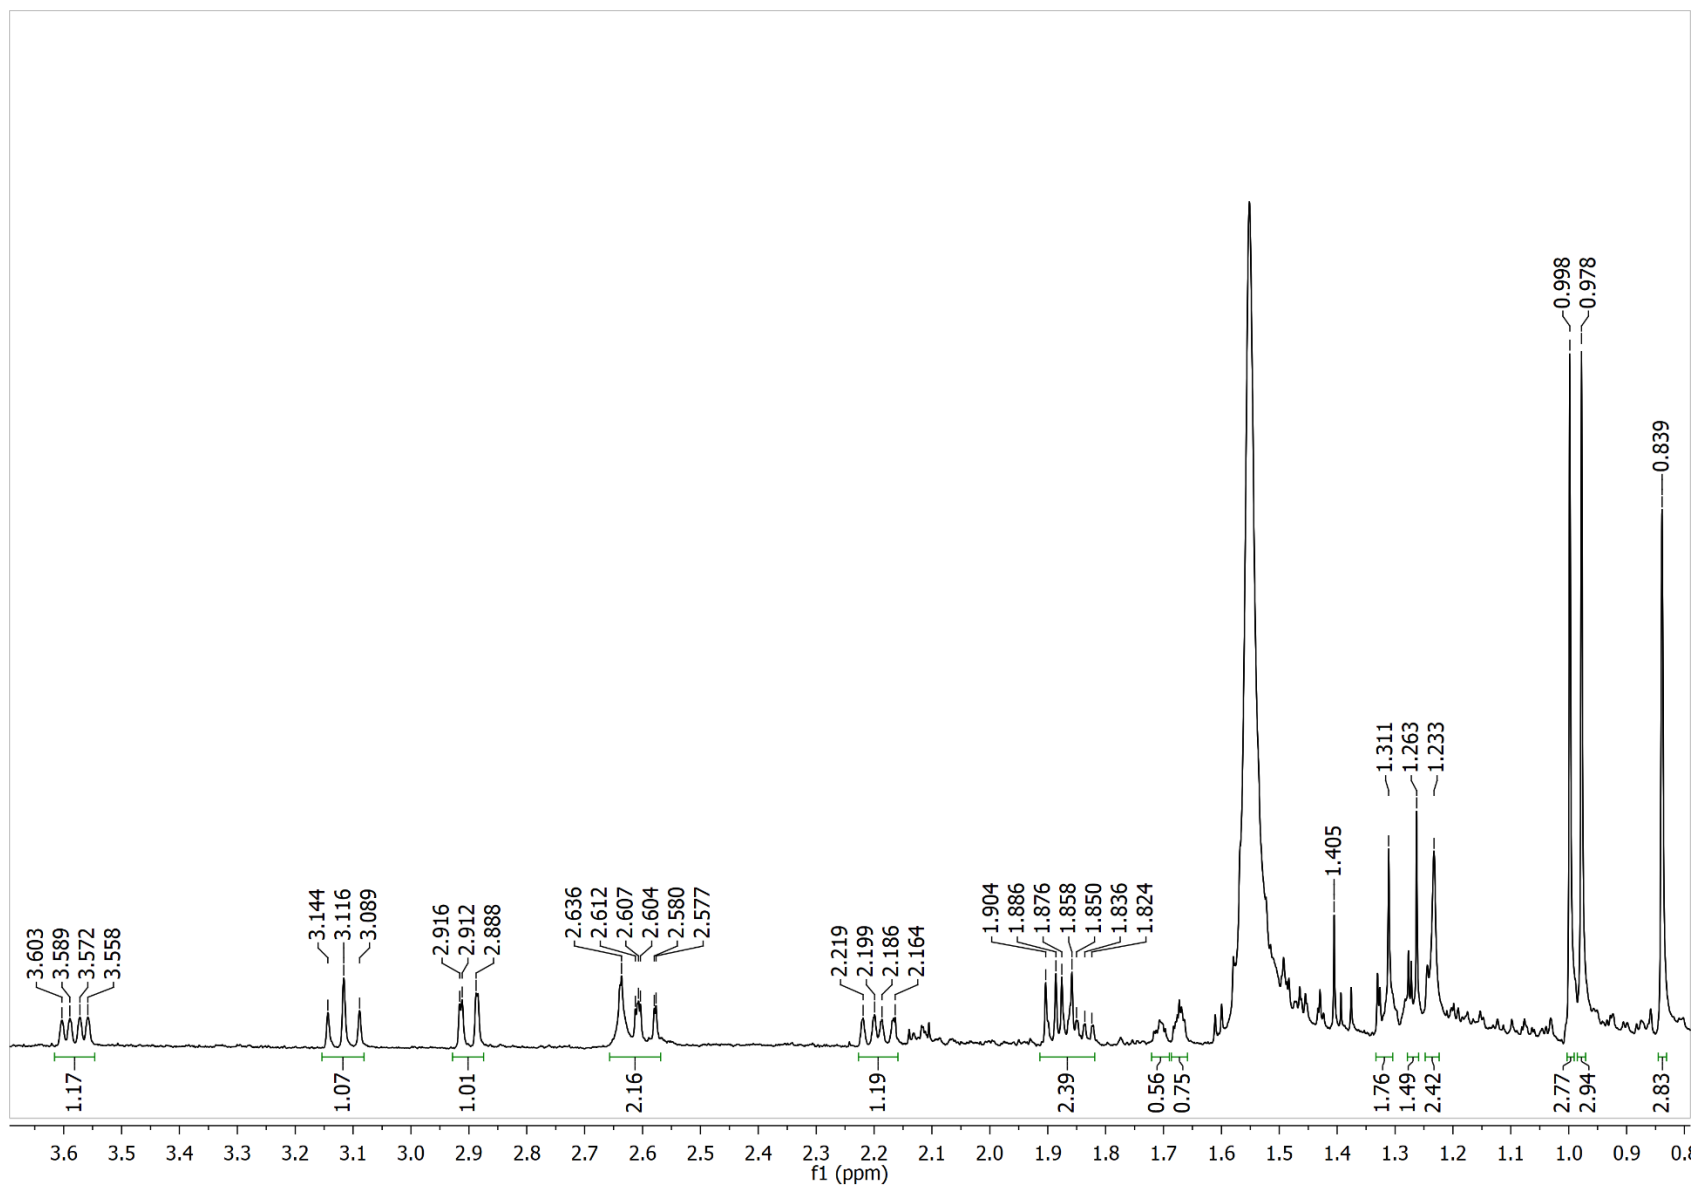

**Figure S76.**  $^{13}\text{C}$  NMR (100 MHz,  $\text{CDCl}_3$ ) spectrum of **5**

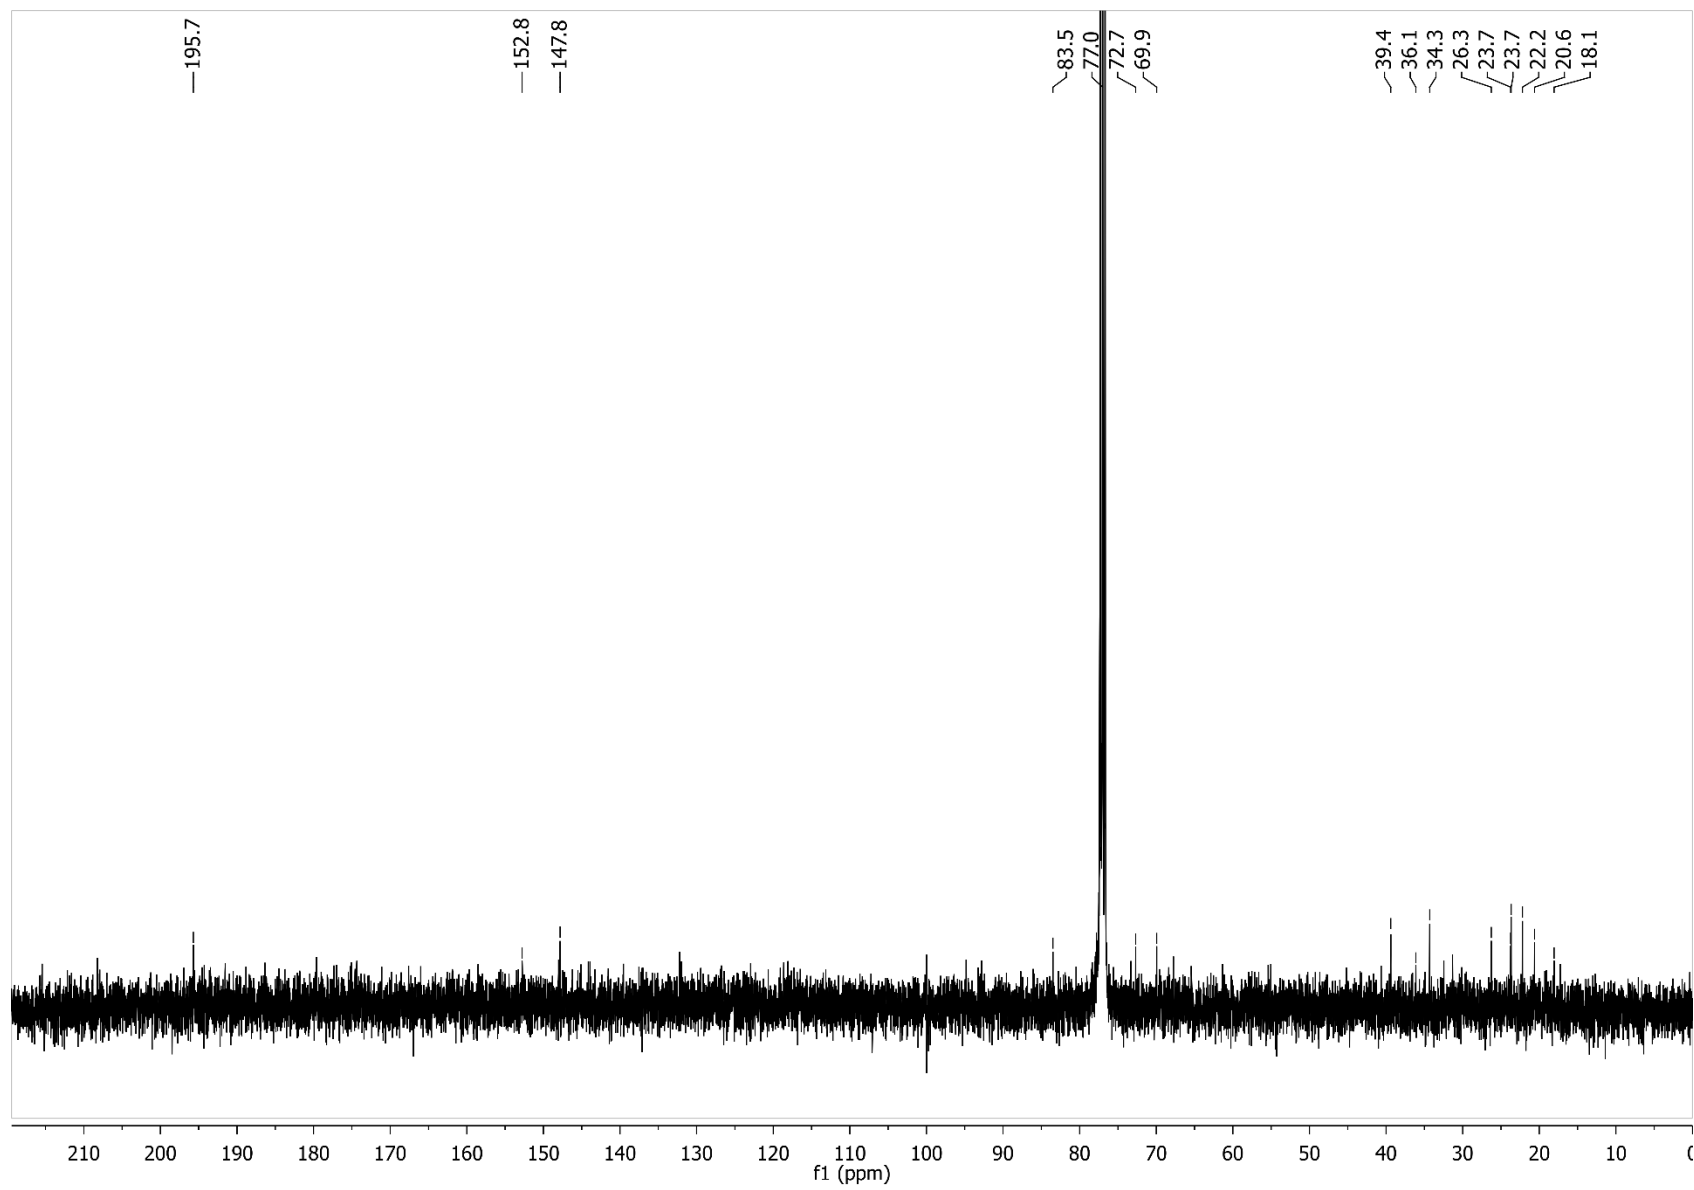

**Figure S77.**  $^{13}\text{C}$  DEPT-135 NMR (100 MHz,  $\text{CDCl}_3$ ) spectrum of **5**

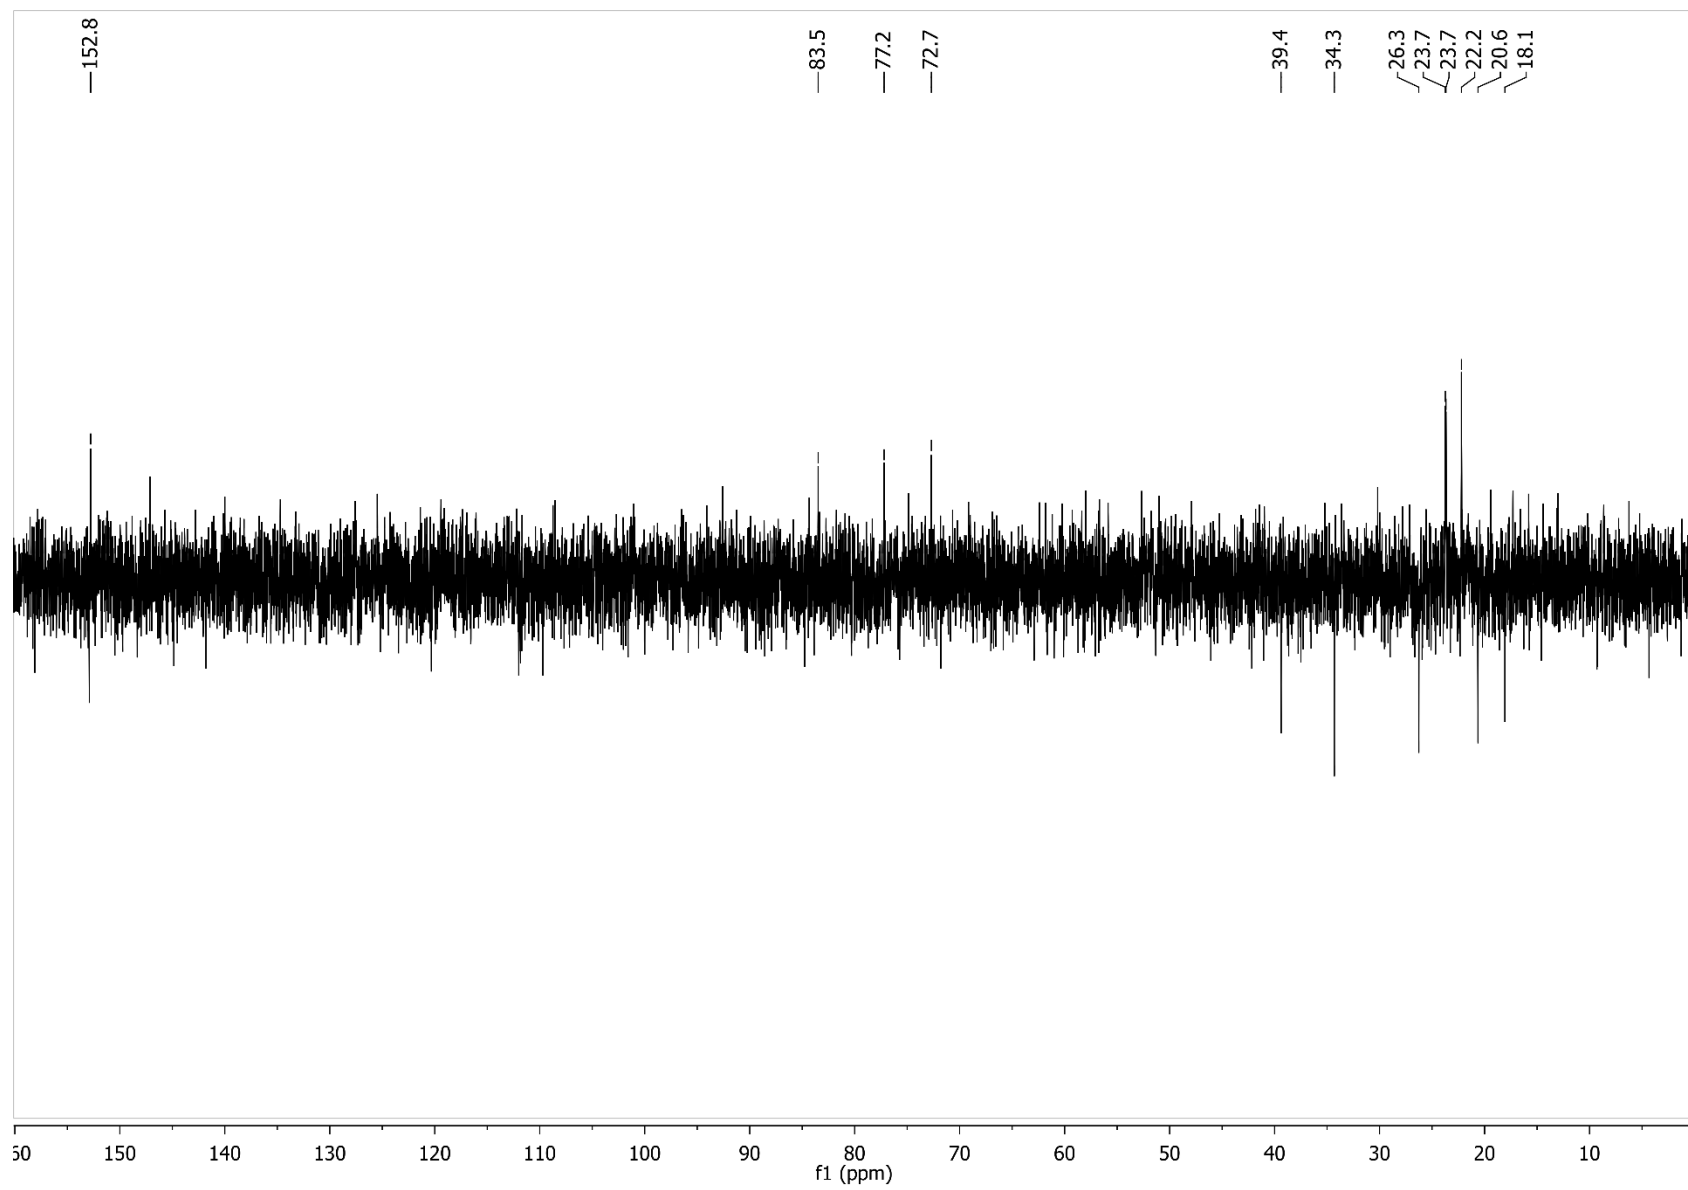

**Figure S78.** HSQC NMR (400 MHz, CDCl<sub>3</sub>) spectrum of **5**

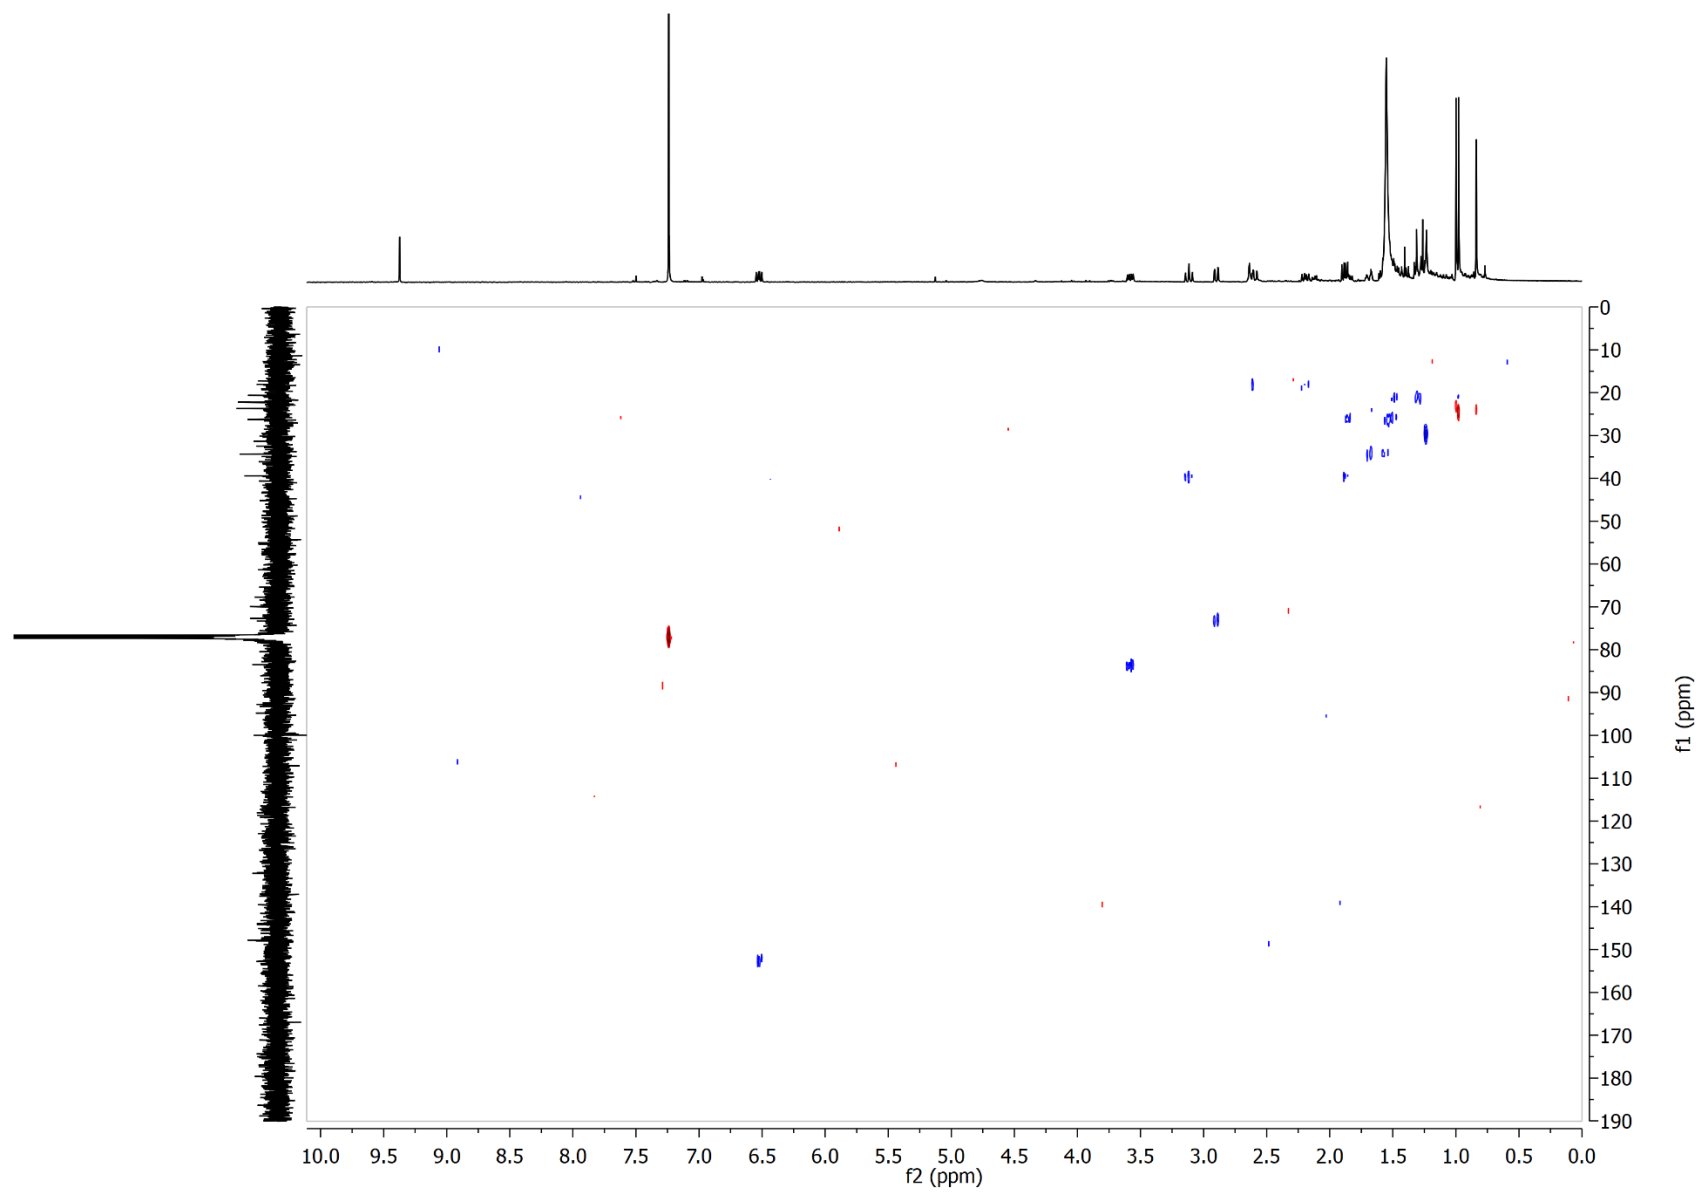

**Figure S79.** HSQC NMR (400 MHz, CDCl<sub>3</sub>) extension spectrum of **5**

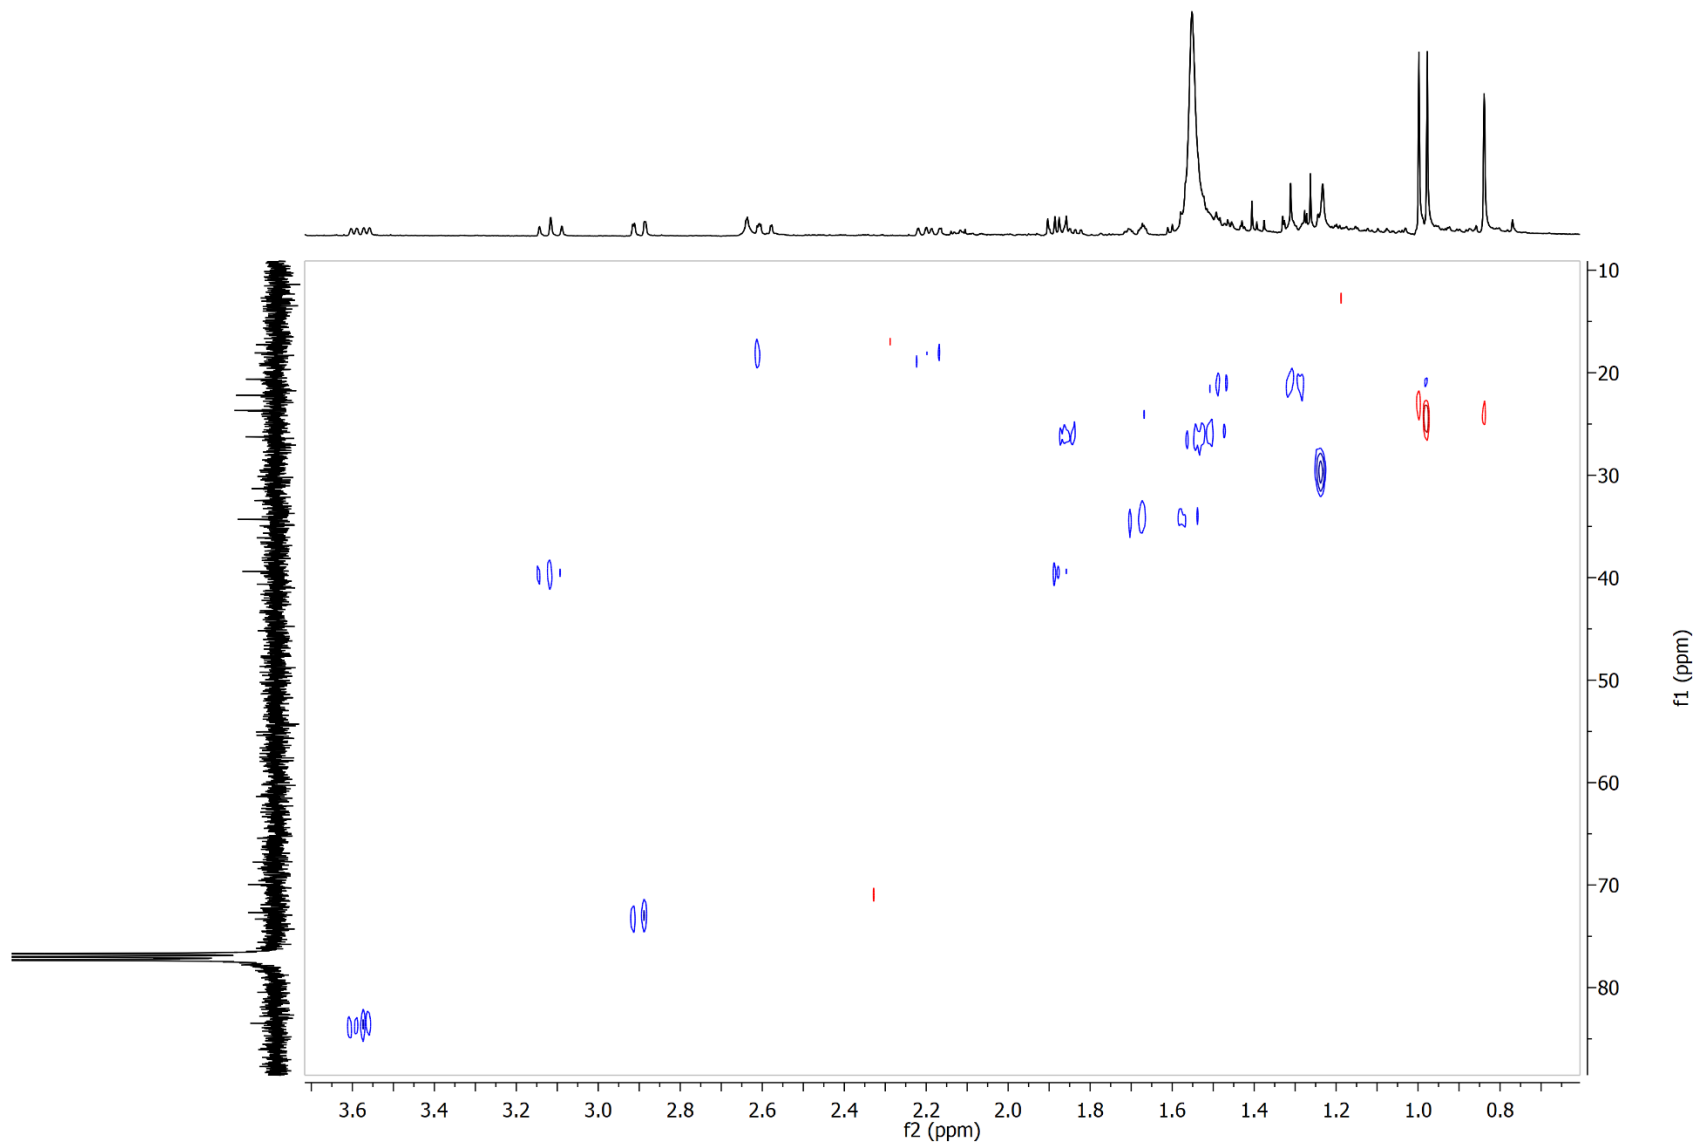



**Figure S80.** HMBC NMR (400 MHz, CDCl<sub>3</sub>) spectrum of **5**

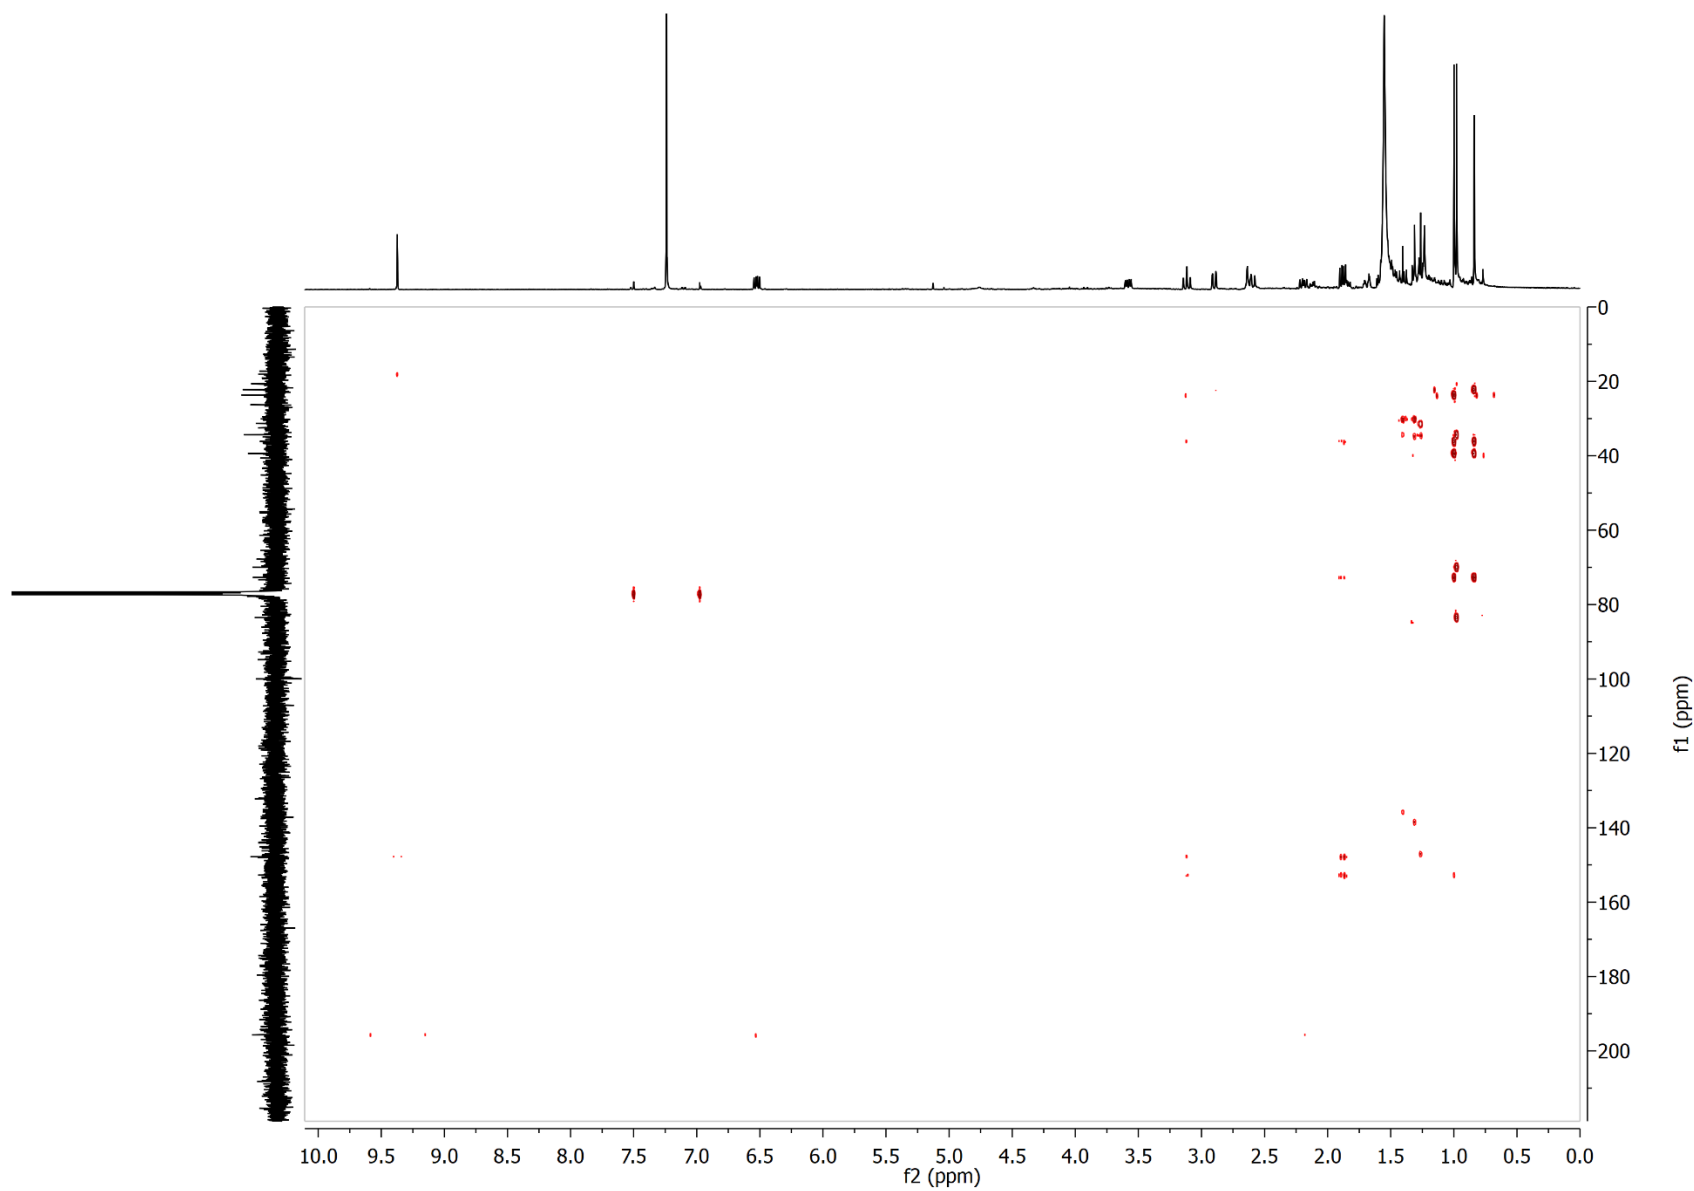

**Figure S81.** HMBC NMR (400 MHz, CDCl<sub>3</sub>) extension spectrum of **5**

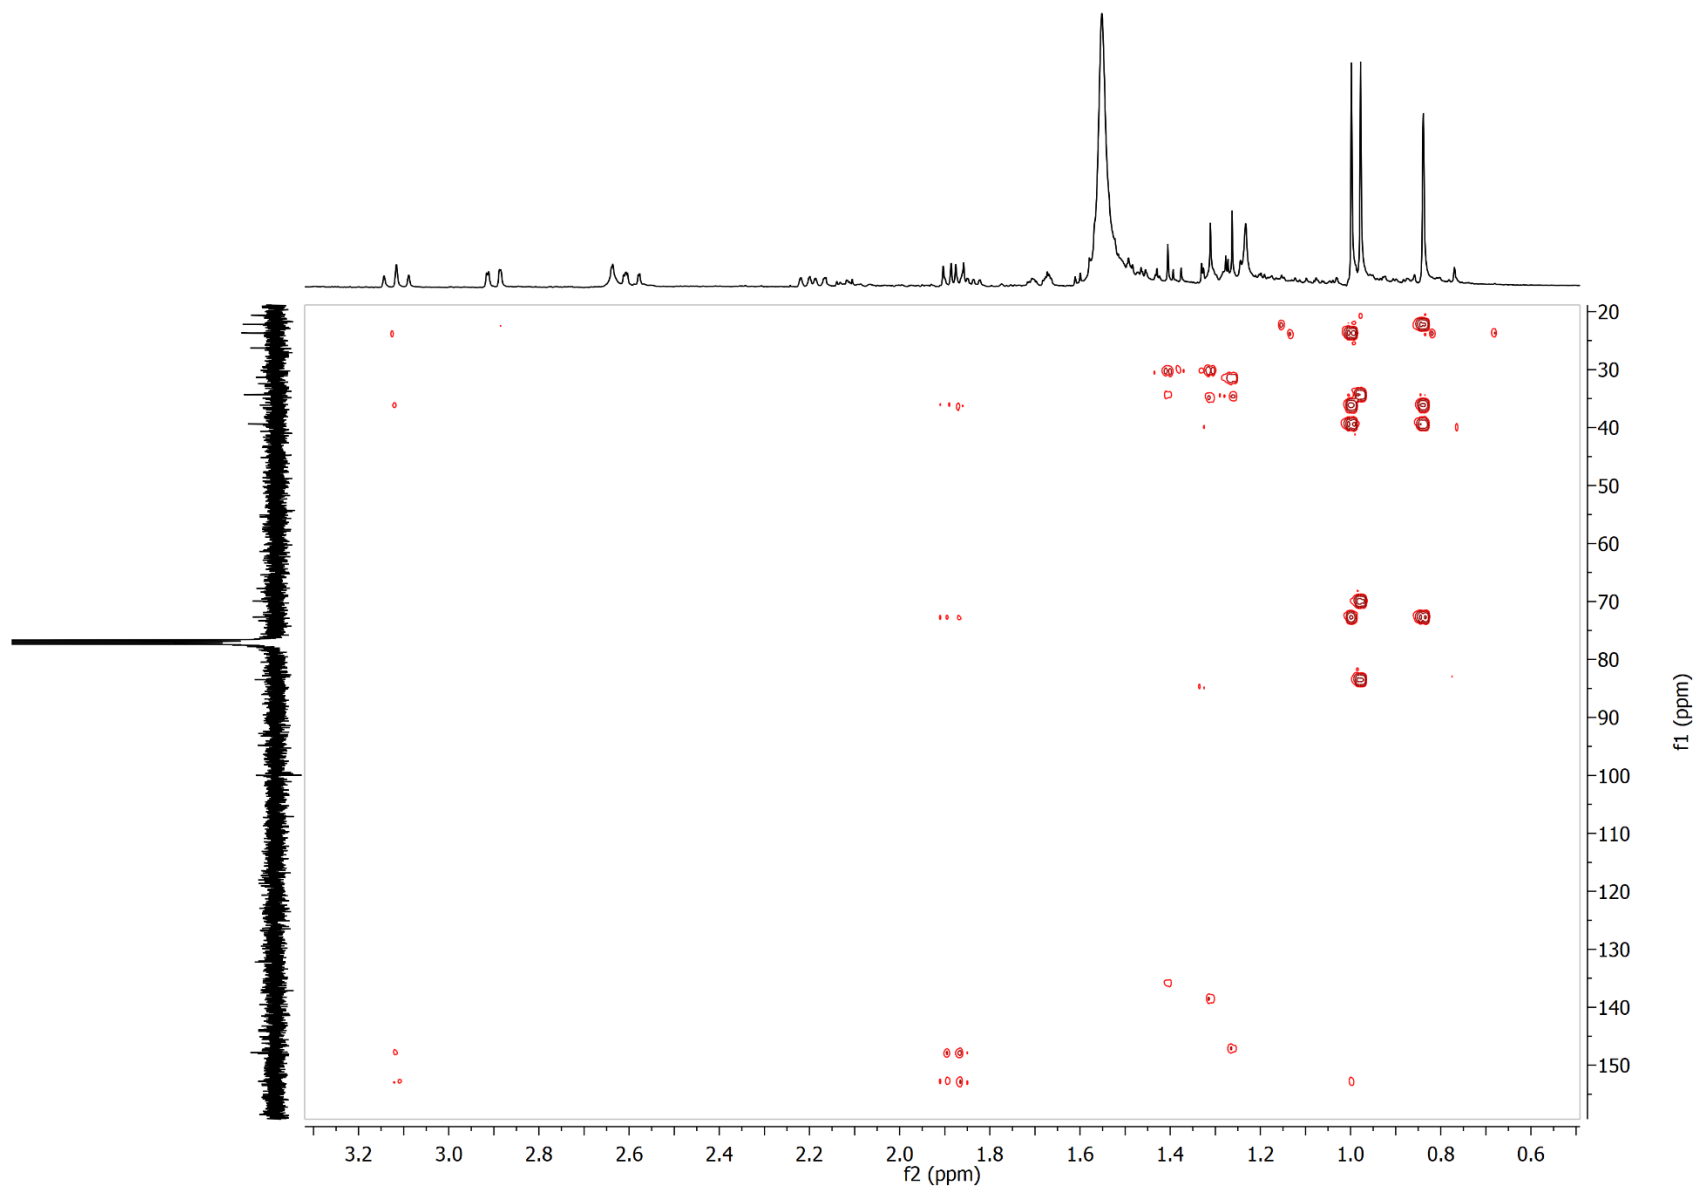

**Figure S82.**  $^1\text{H}$ - $^1\text{H}$  COSY NMR (400 MHz,  $\text{CDCl}_3$ ) spectrum of **5**

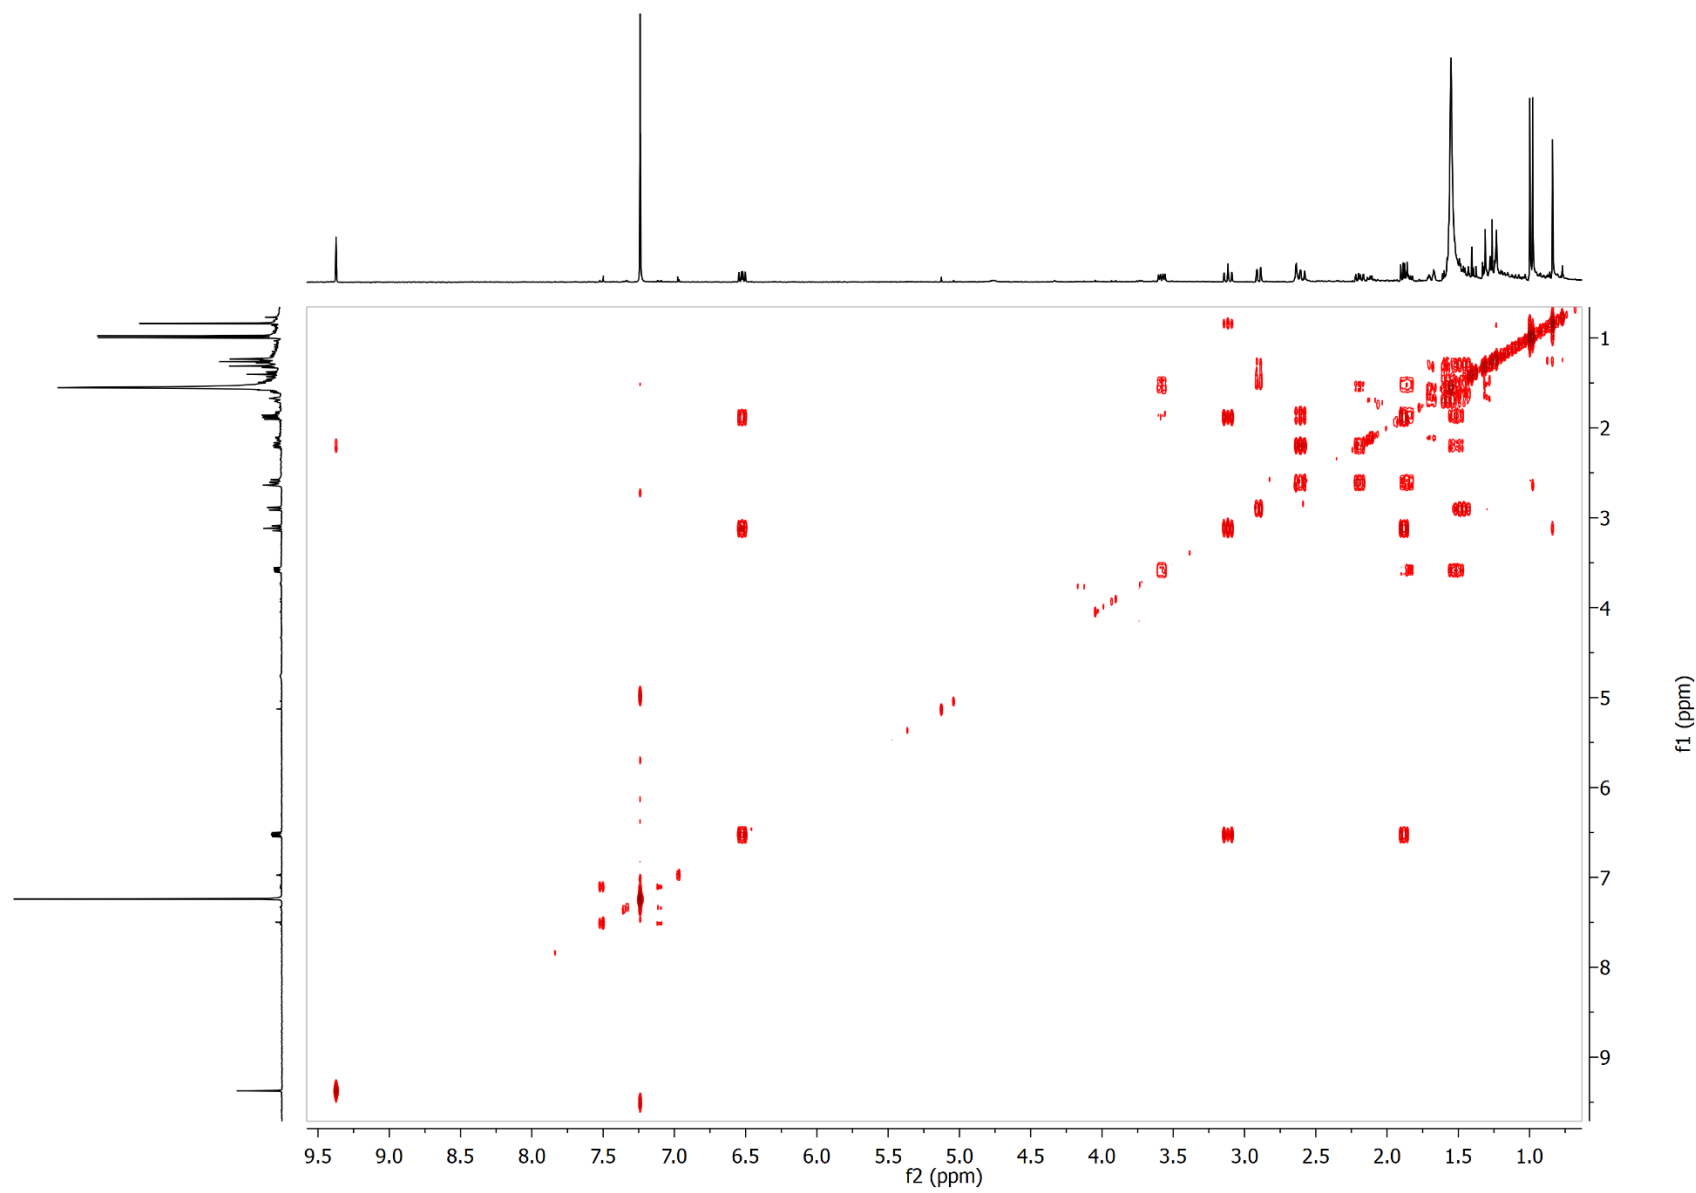

**Figure S83.**  $^1\text{H}$ - $^1\text{H}$  NOESY NMR (400 MHz,  $\text{CDCl}_3$ ) spectrum of **5**

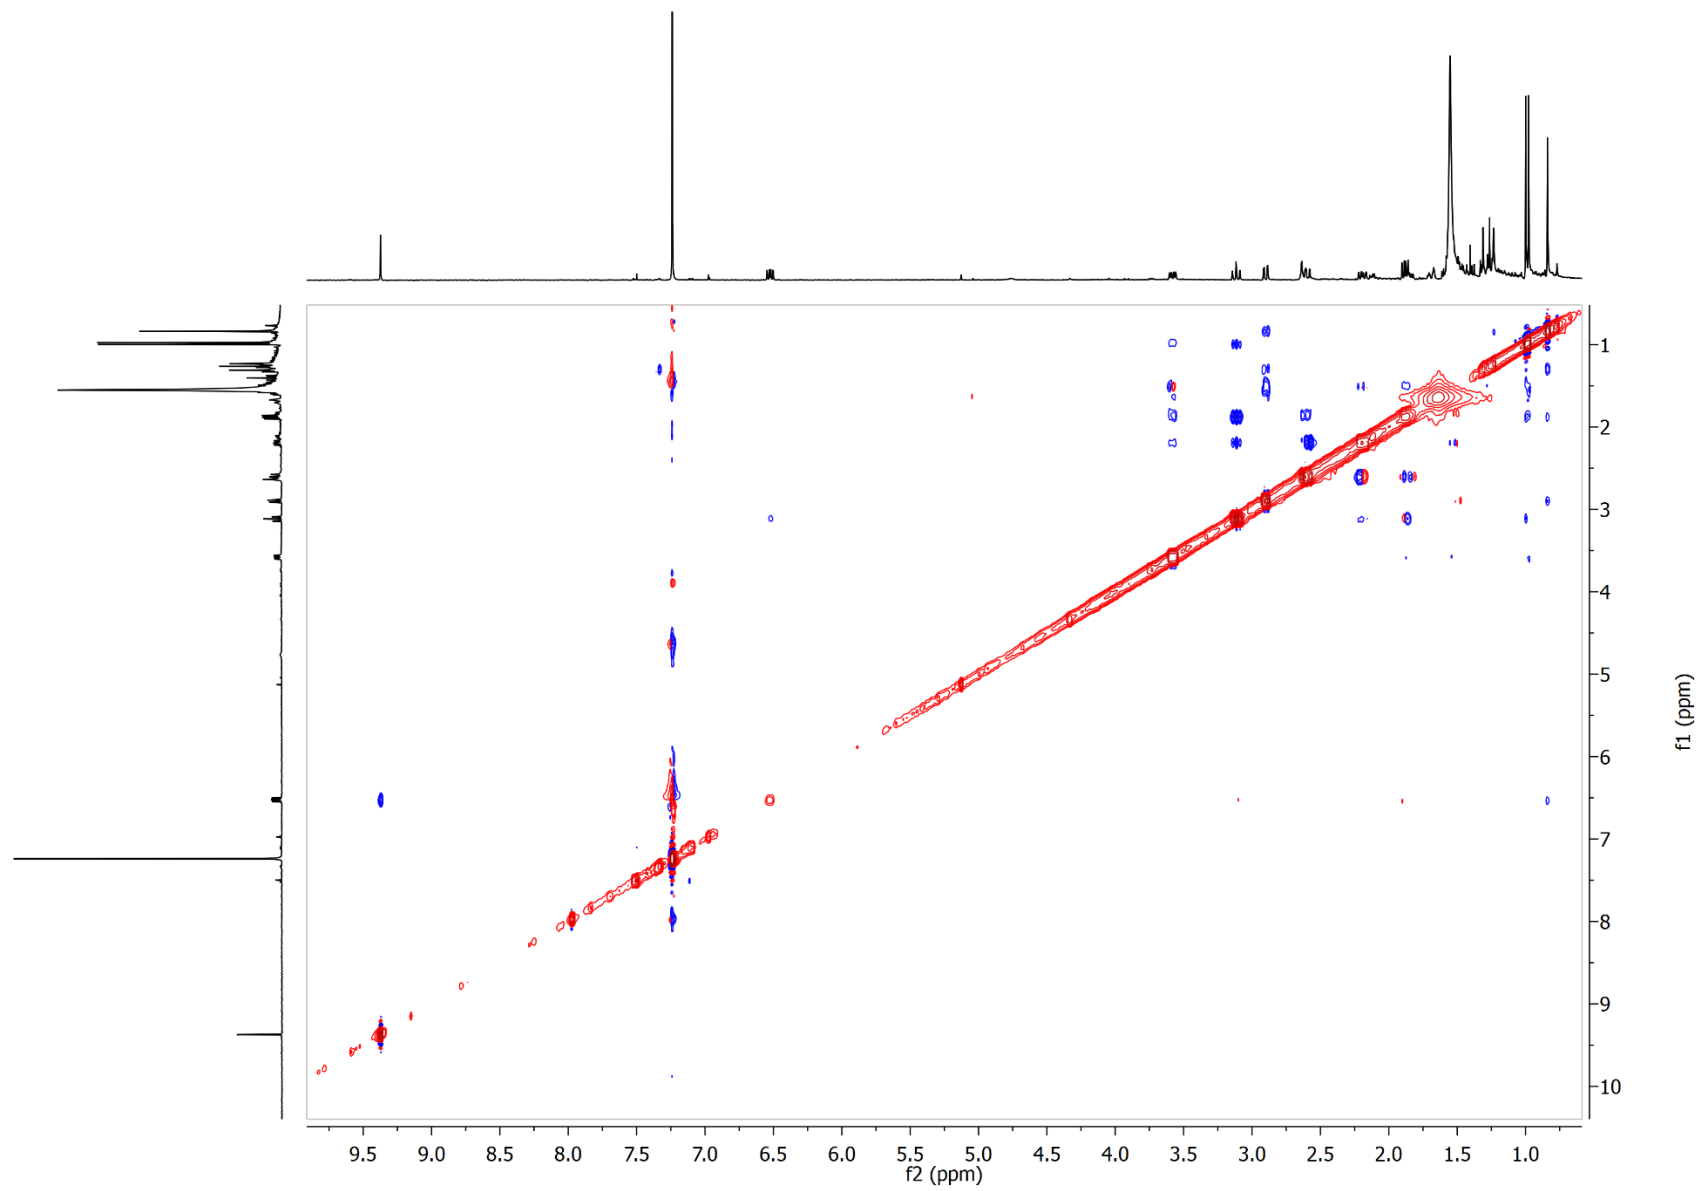

**Figure S84.**  $^1\text{H}$ - $^1\text{H}$  NOESY NMR (400 MHz,  $\text{CDCl}_3$ ) extension spectrum of **5**

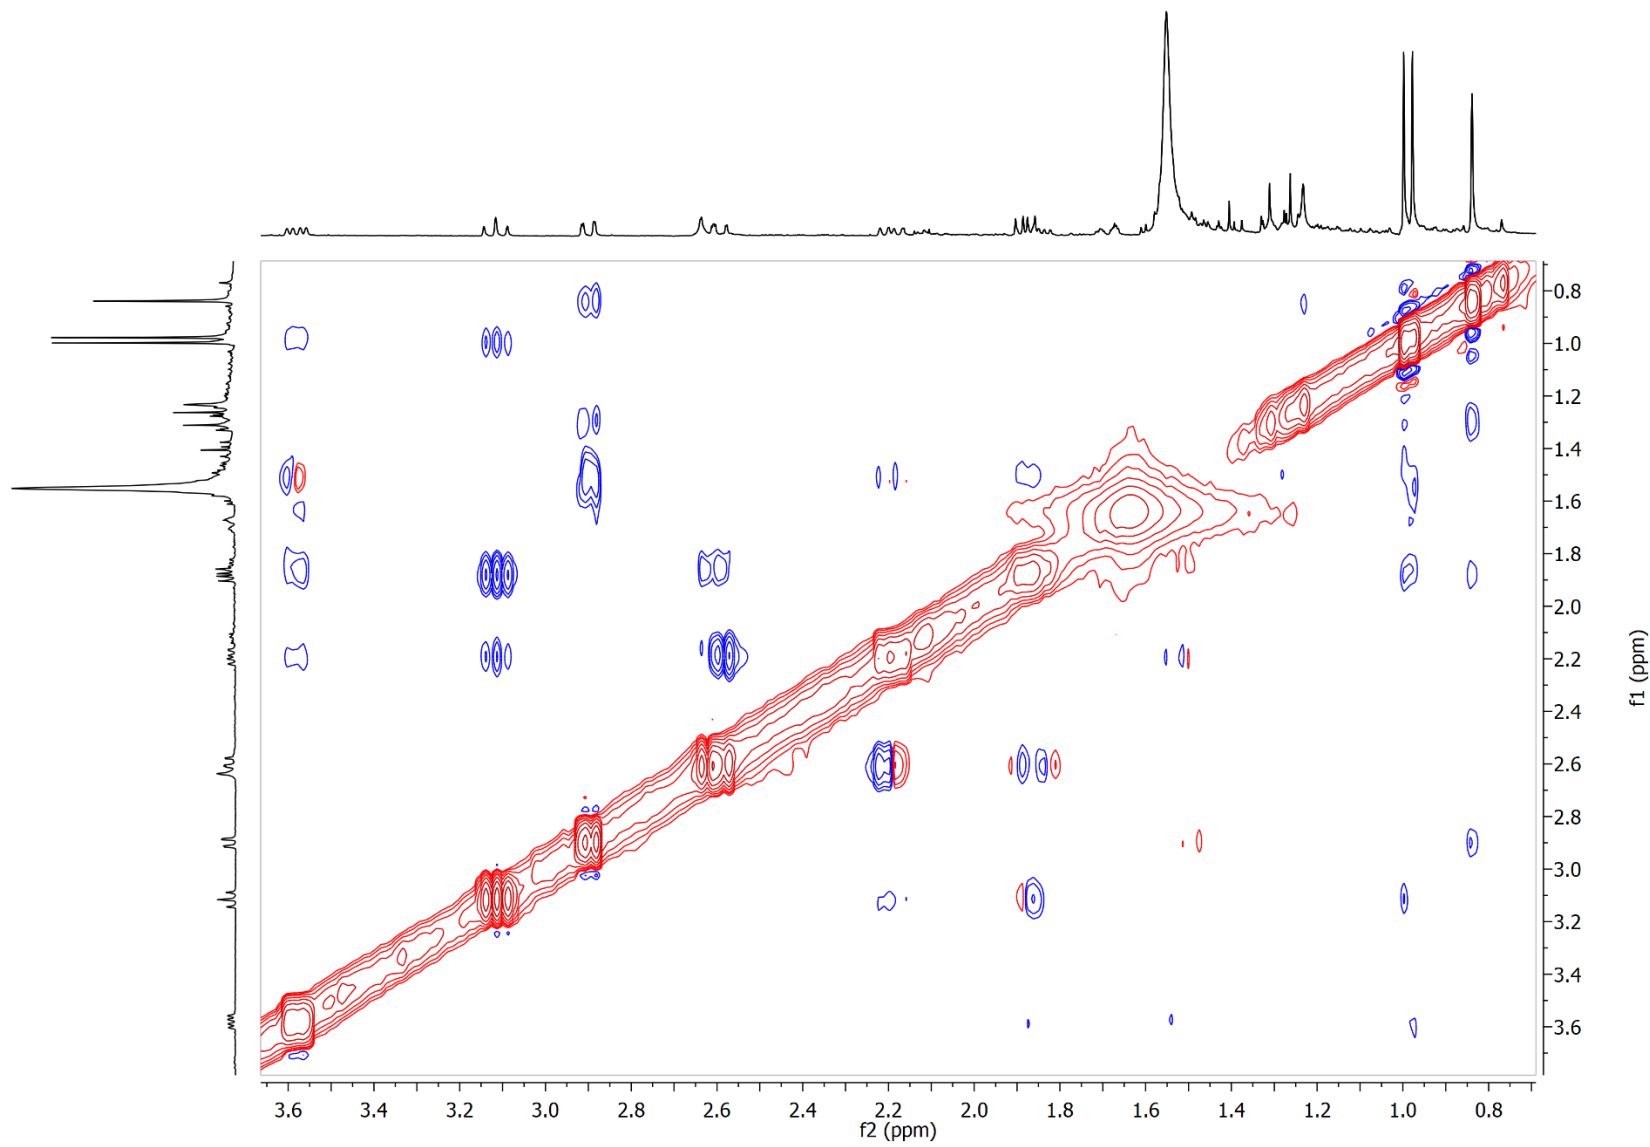

**Figure S85.** IR spectrum of compound **6**

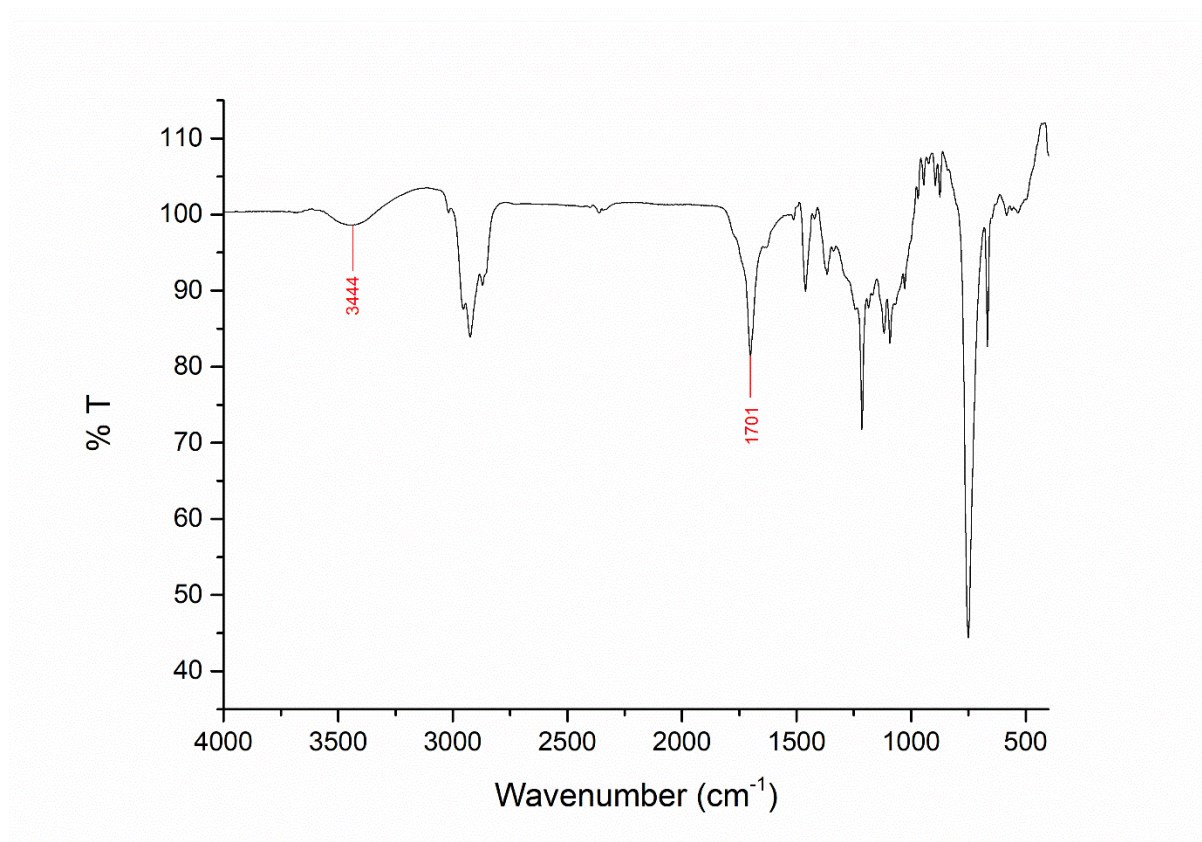

**Figure S86.** HRESIMS spectrum of compound **6** ([M + Na], positive ion mode)

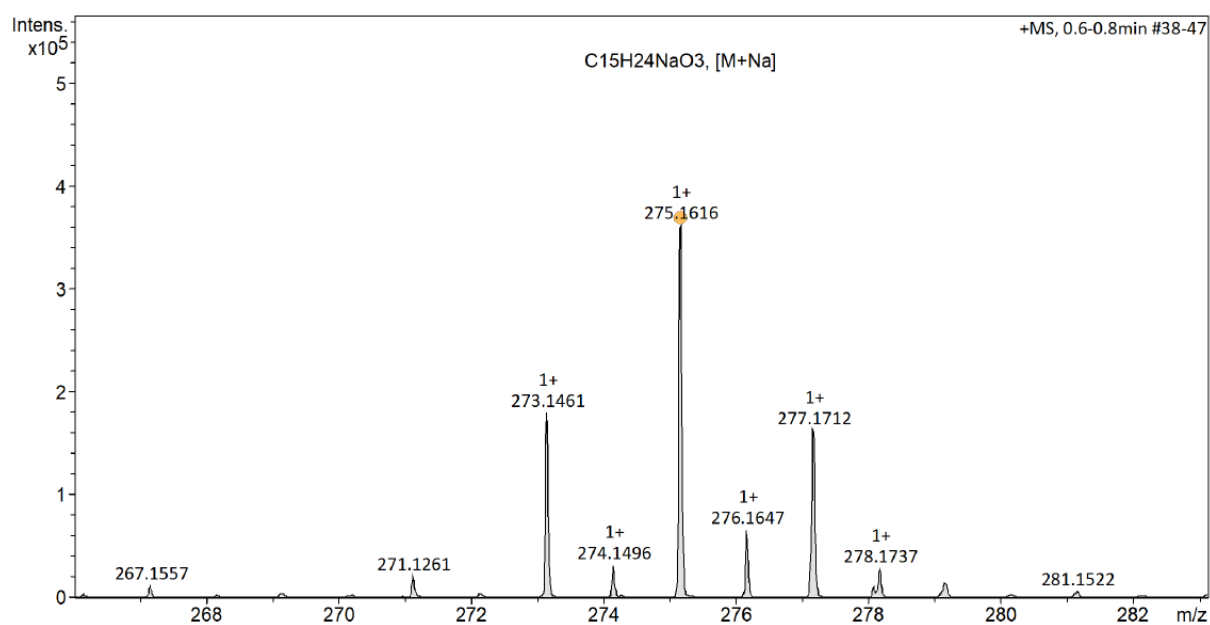

**Figure S87.**  $^1\text{H}$  NMR (400 MHz,  $\text{CDCl}_3$ ) spectrum of **6**

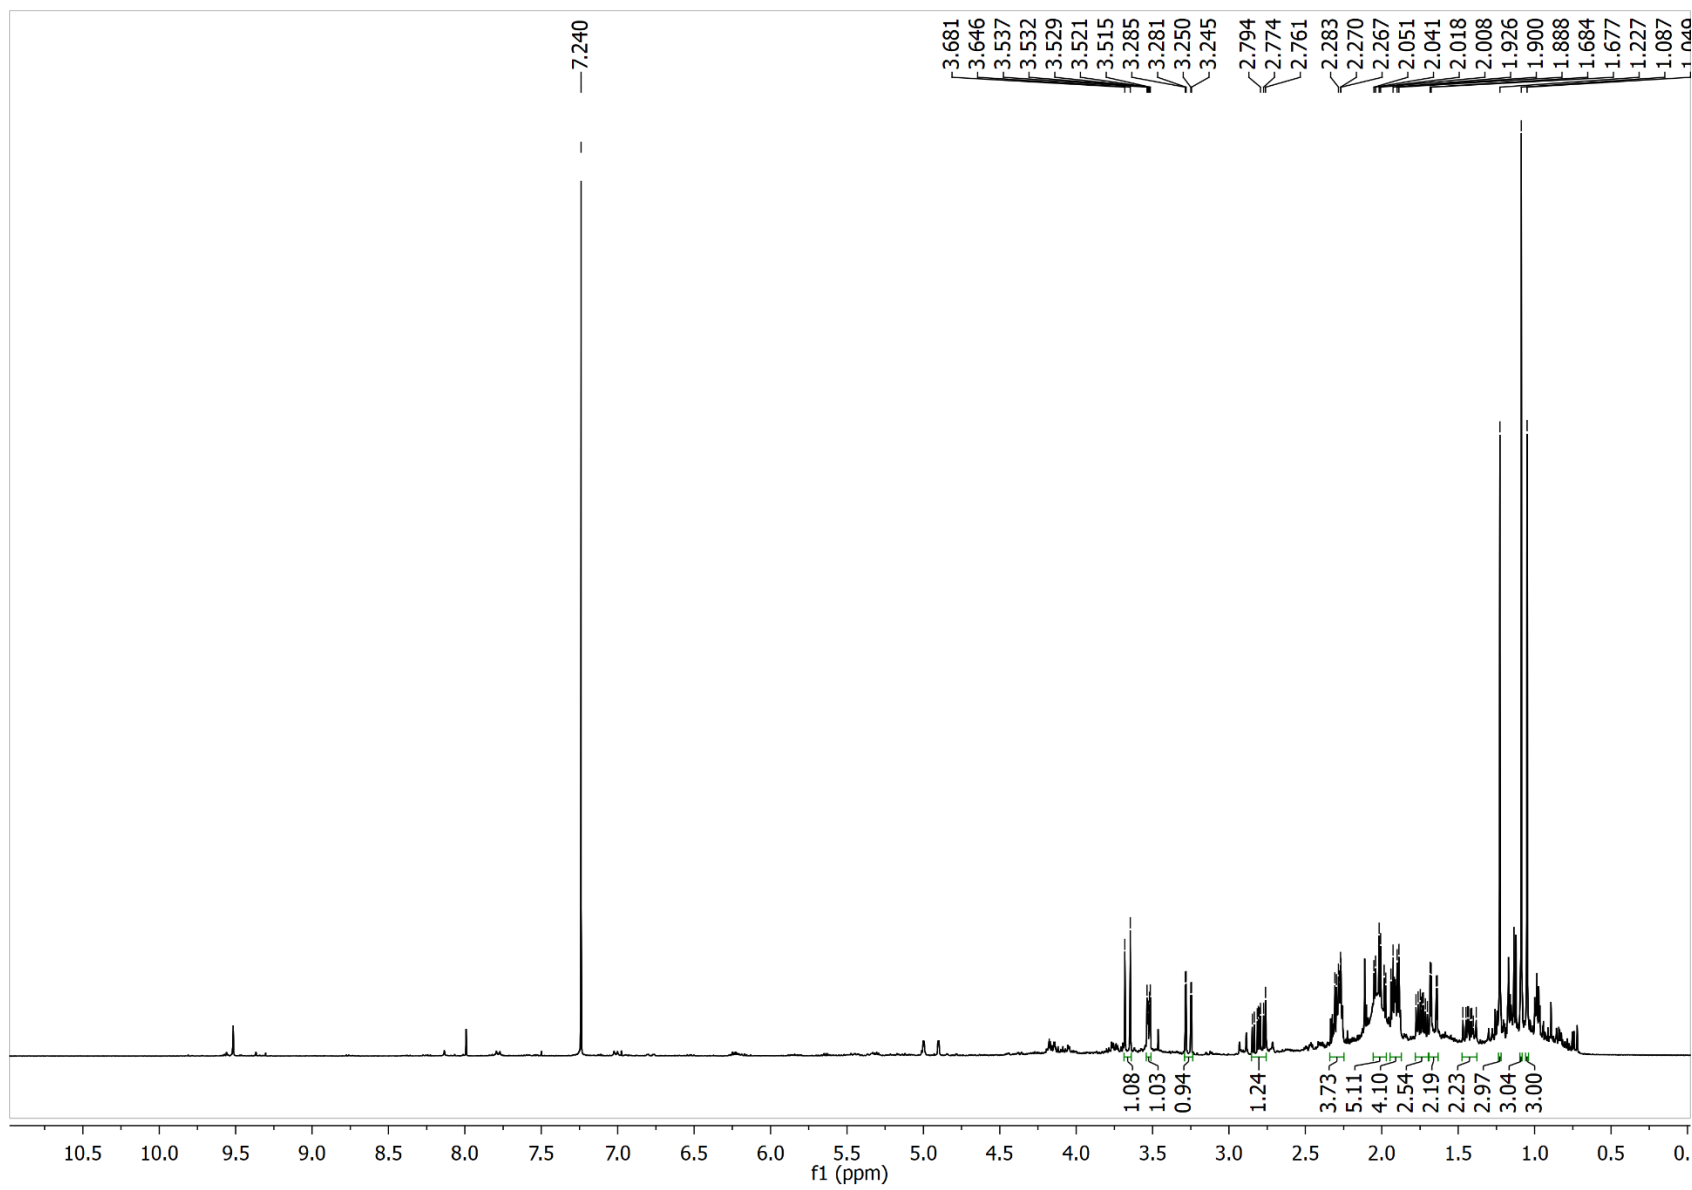

**Figure S88.**  $^1\text{H}$  NMR (400 MHz,  $\text{CDCl}_3$ ) extension spectrum of **6**

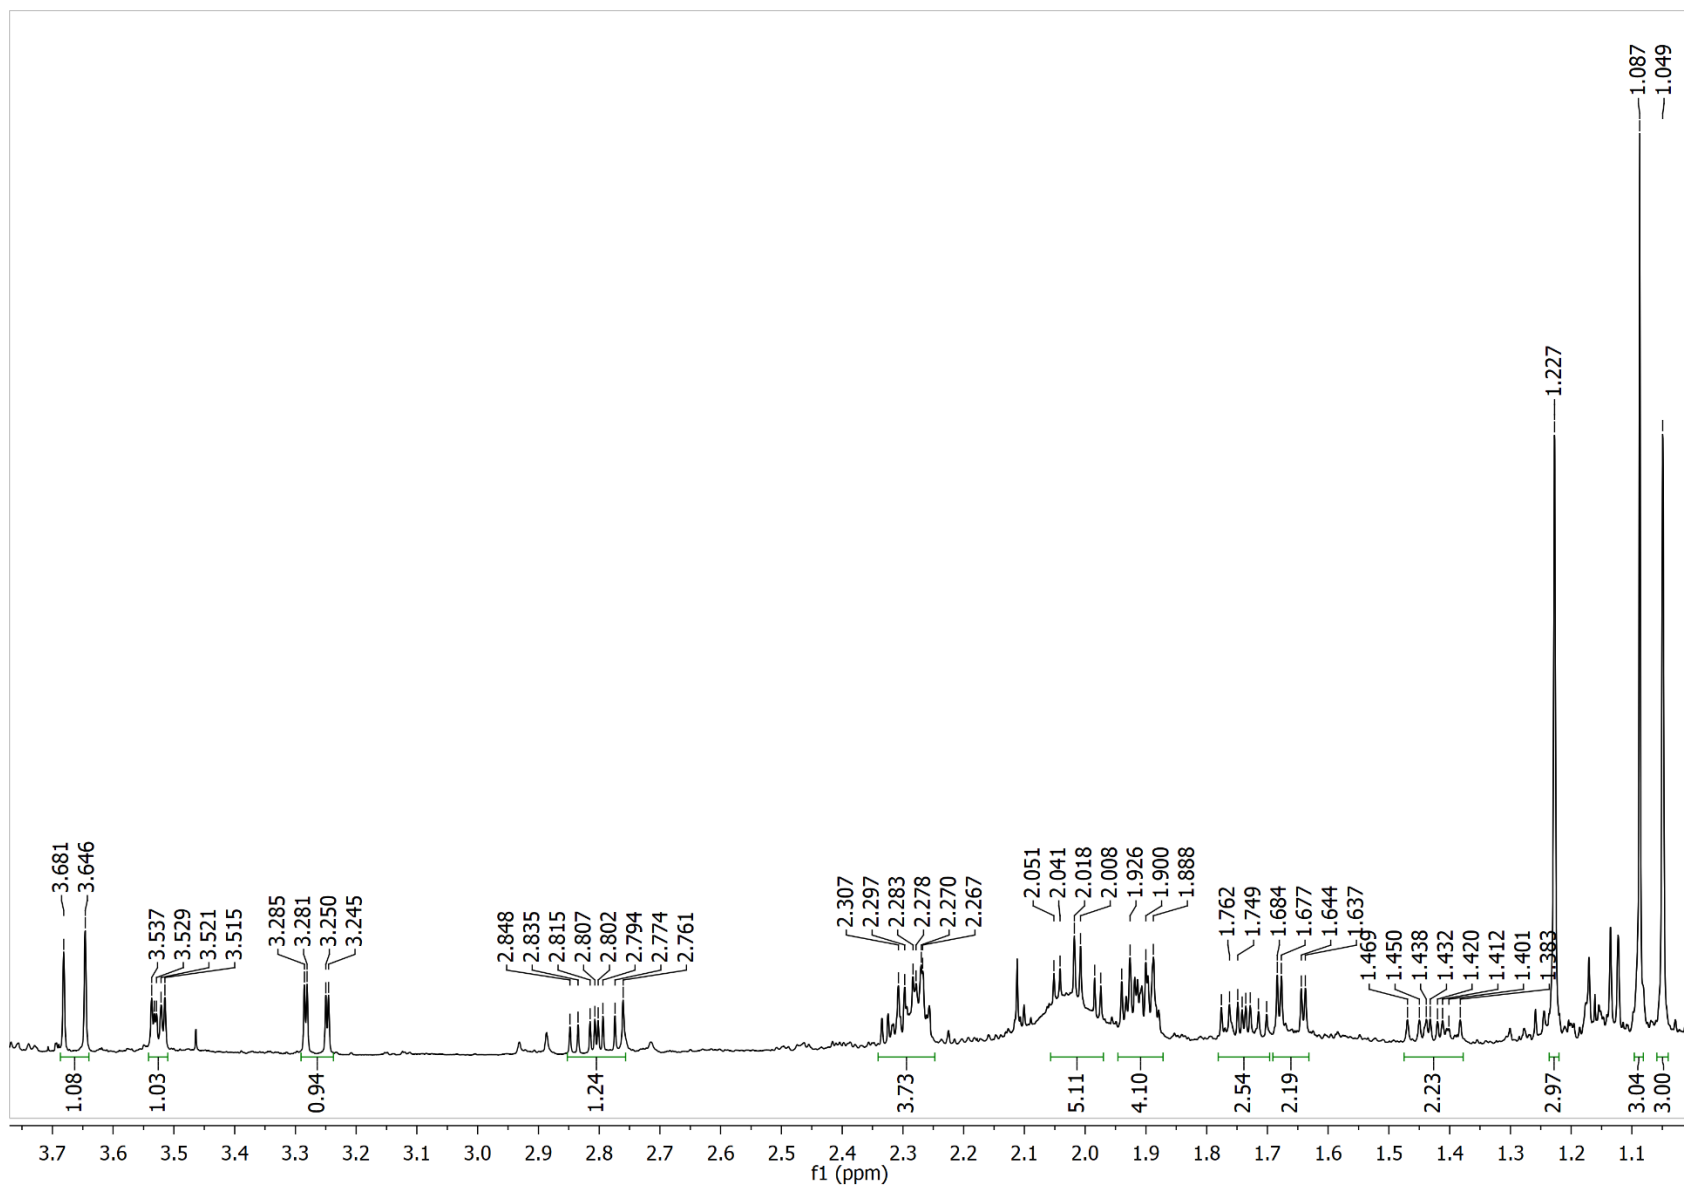



**Figure S89.**  $^{13}\text{C}$  NMR (400 MHz,  $\text{CDCl}_3$ ) spectrum of **6**

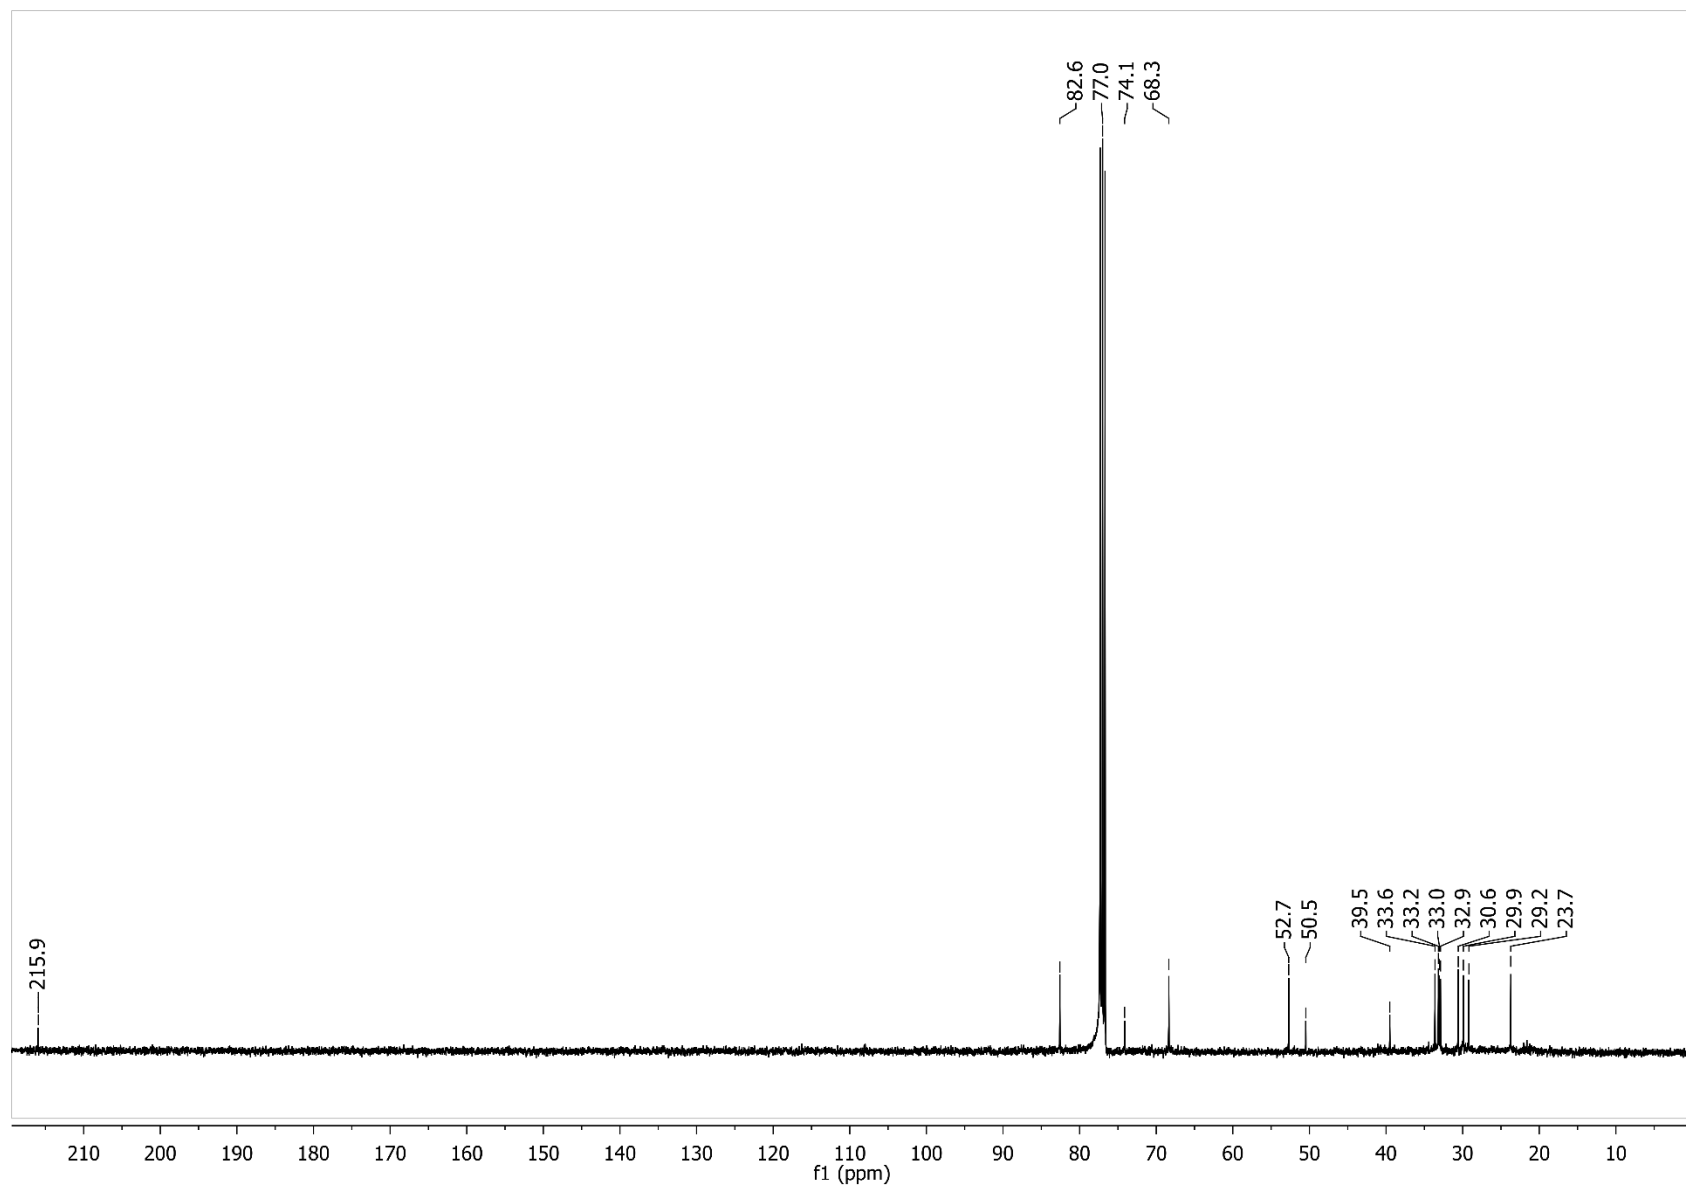

**Figure S90.** DEPT-135 NMR (400 MHz, CDCl<sub>3</sub>) spectrum of **6**

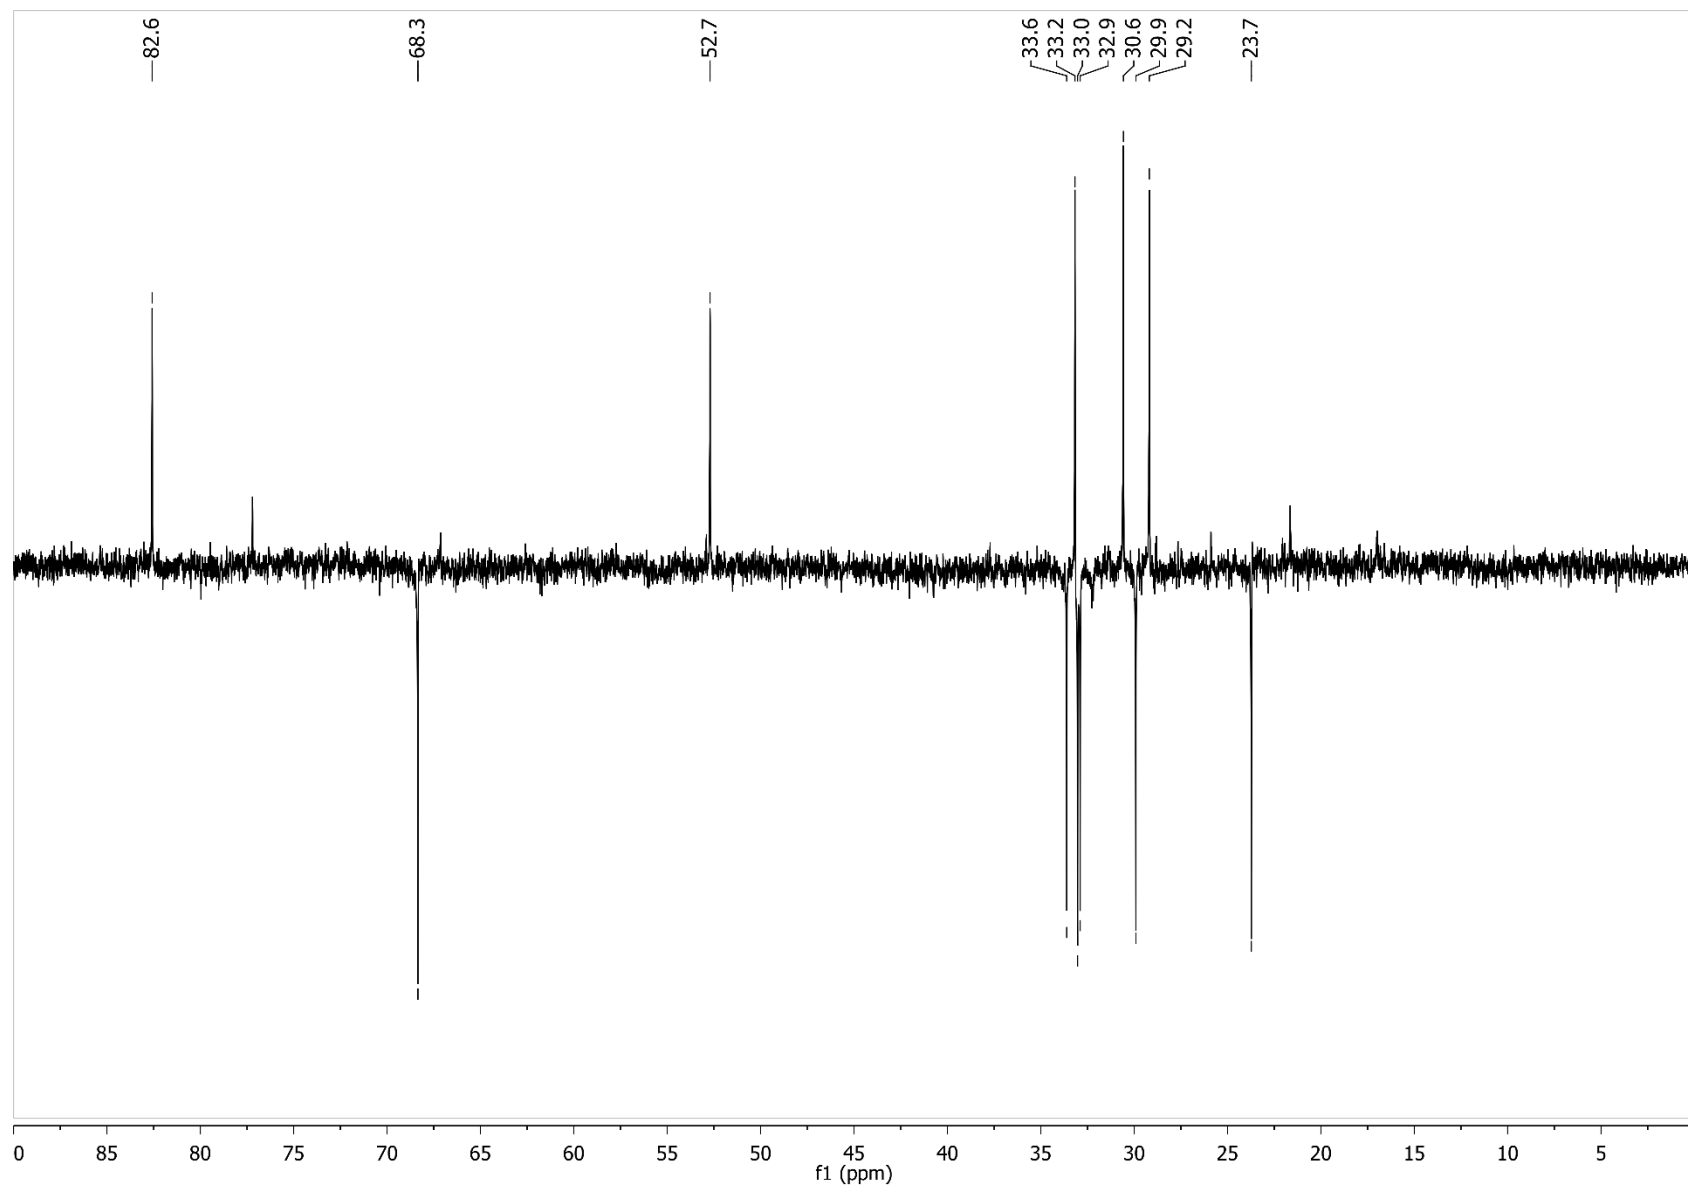

**Figure S91.** HSQC NMR (400 MHz, CDCl<sub>3</sub>) spectrum of **6**

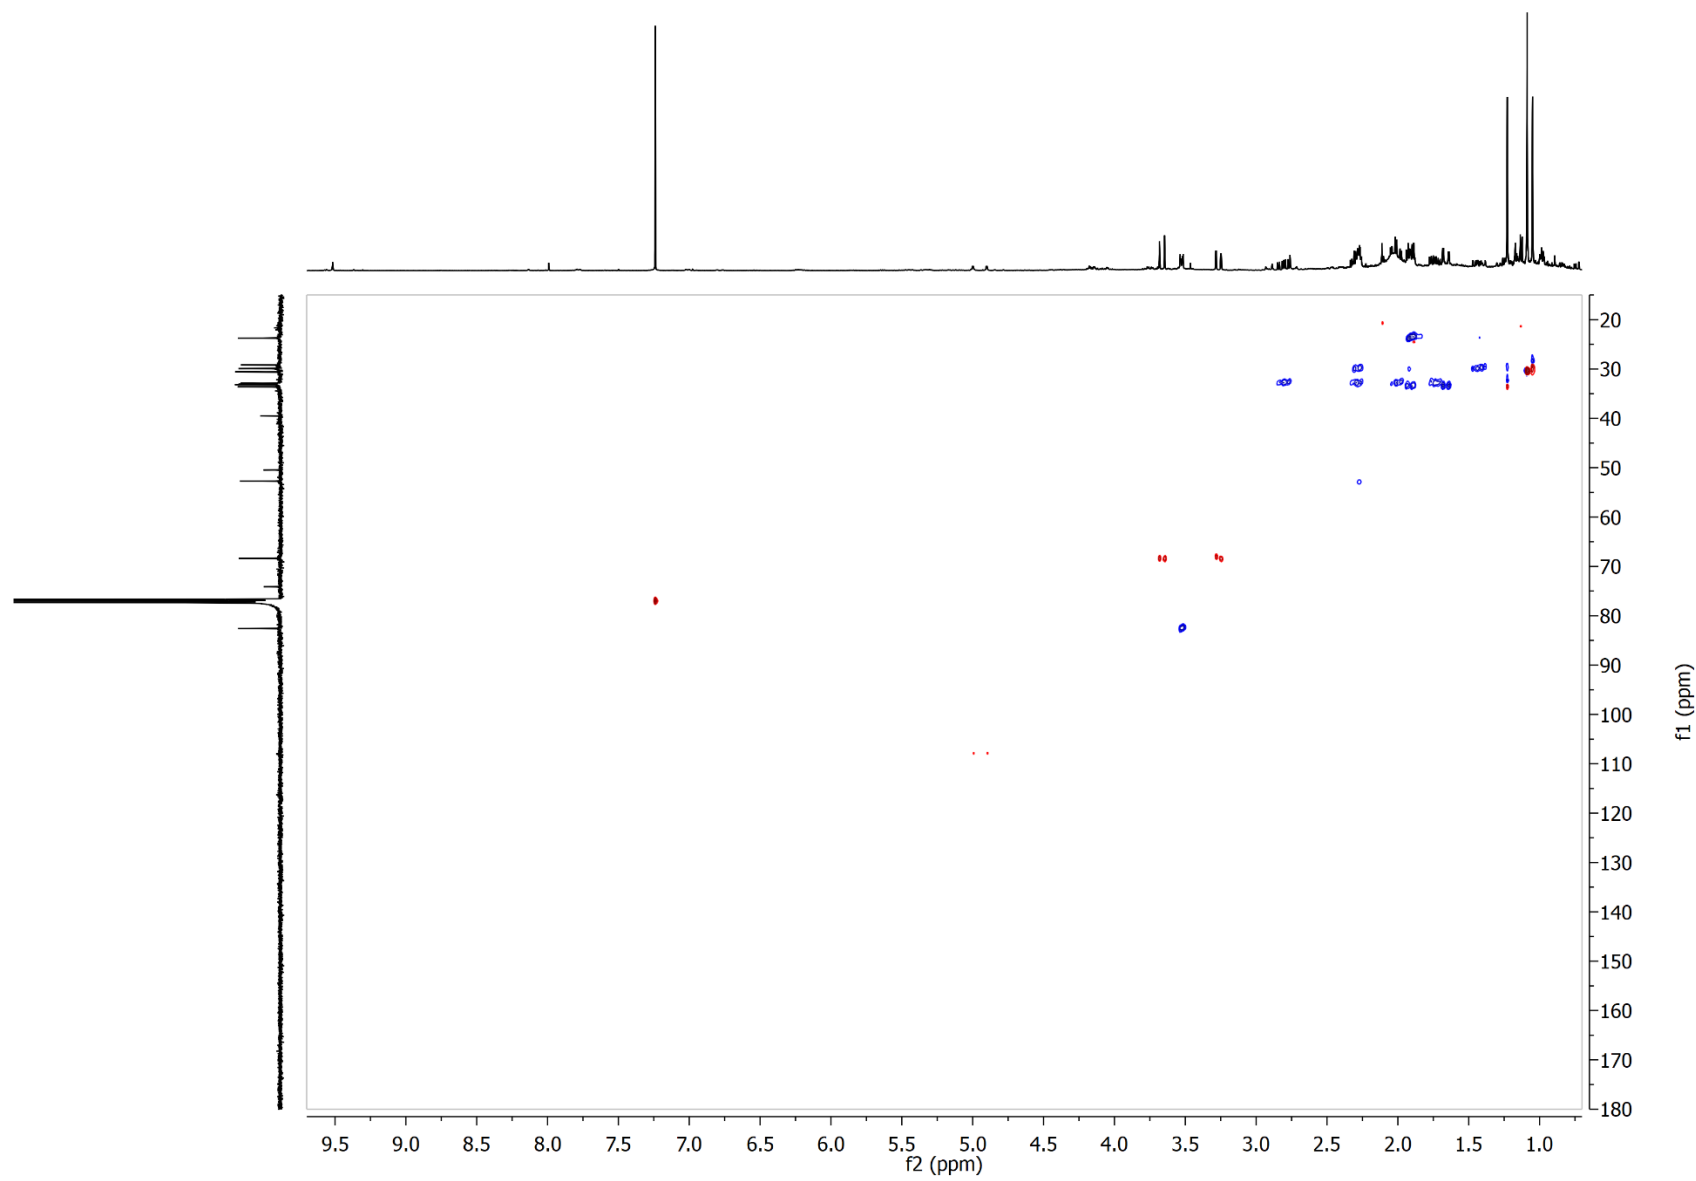

**Figure S92.** HSQC NMR (400 MHz, CDCl<sub>3</sub>) extension spectrum of **6**

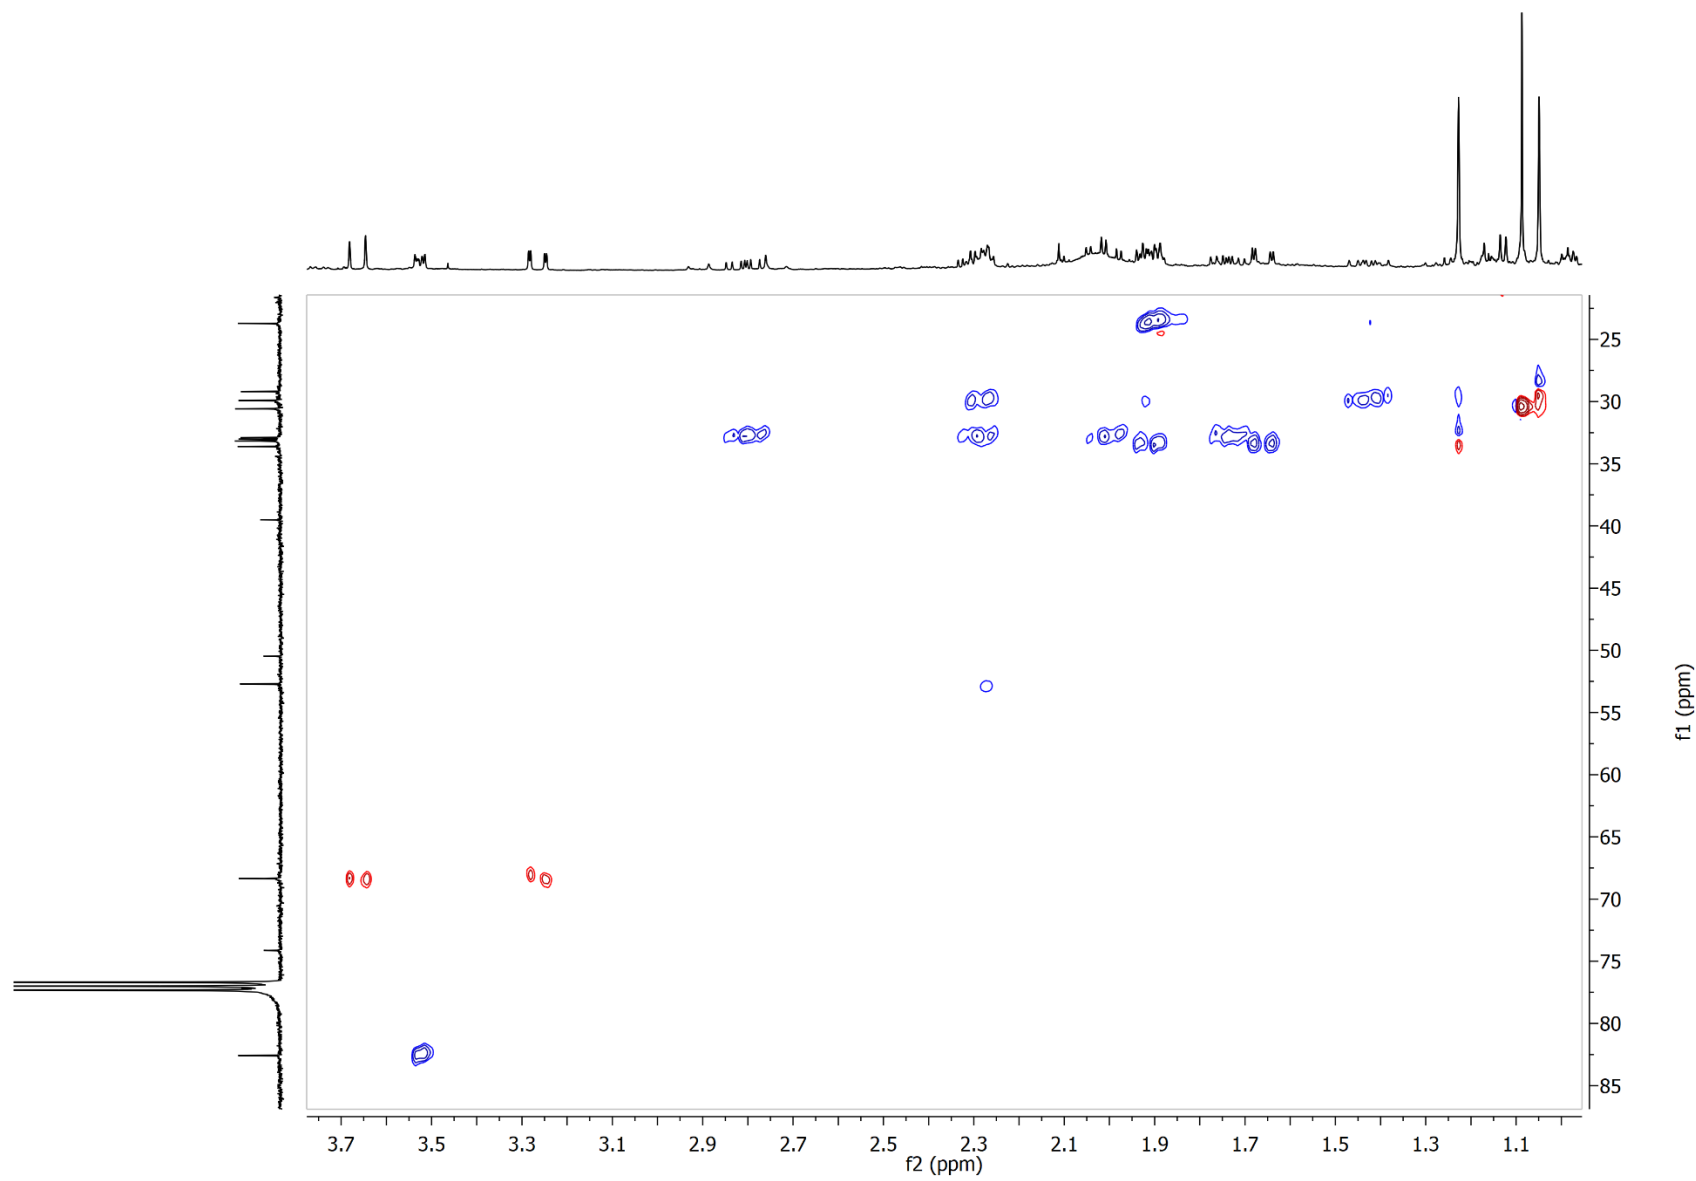

**Figure S93.** HMBC NMR (400 MHz, CDCl<sub>3</sub>) spectrum of **6**

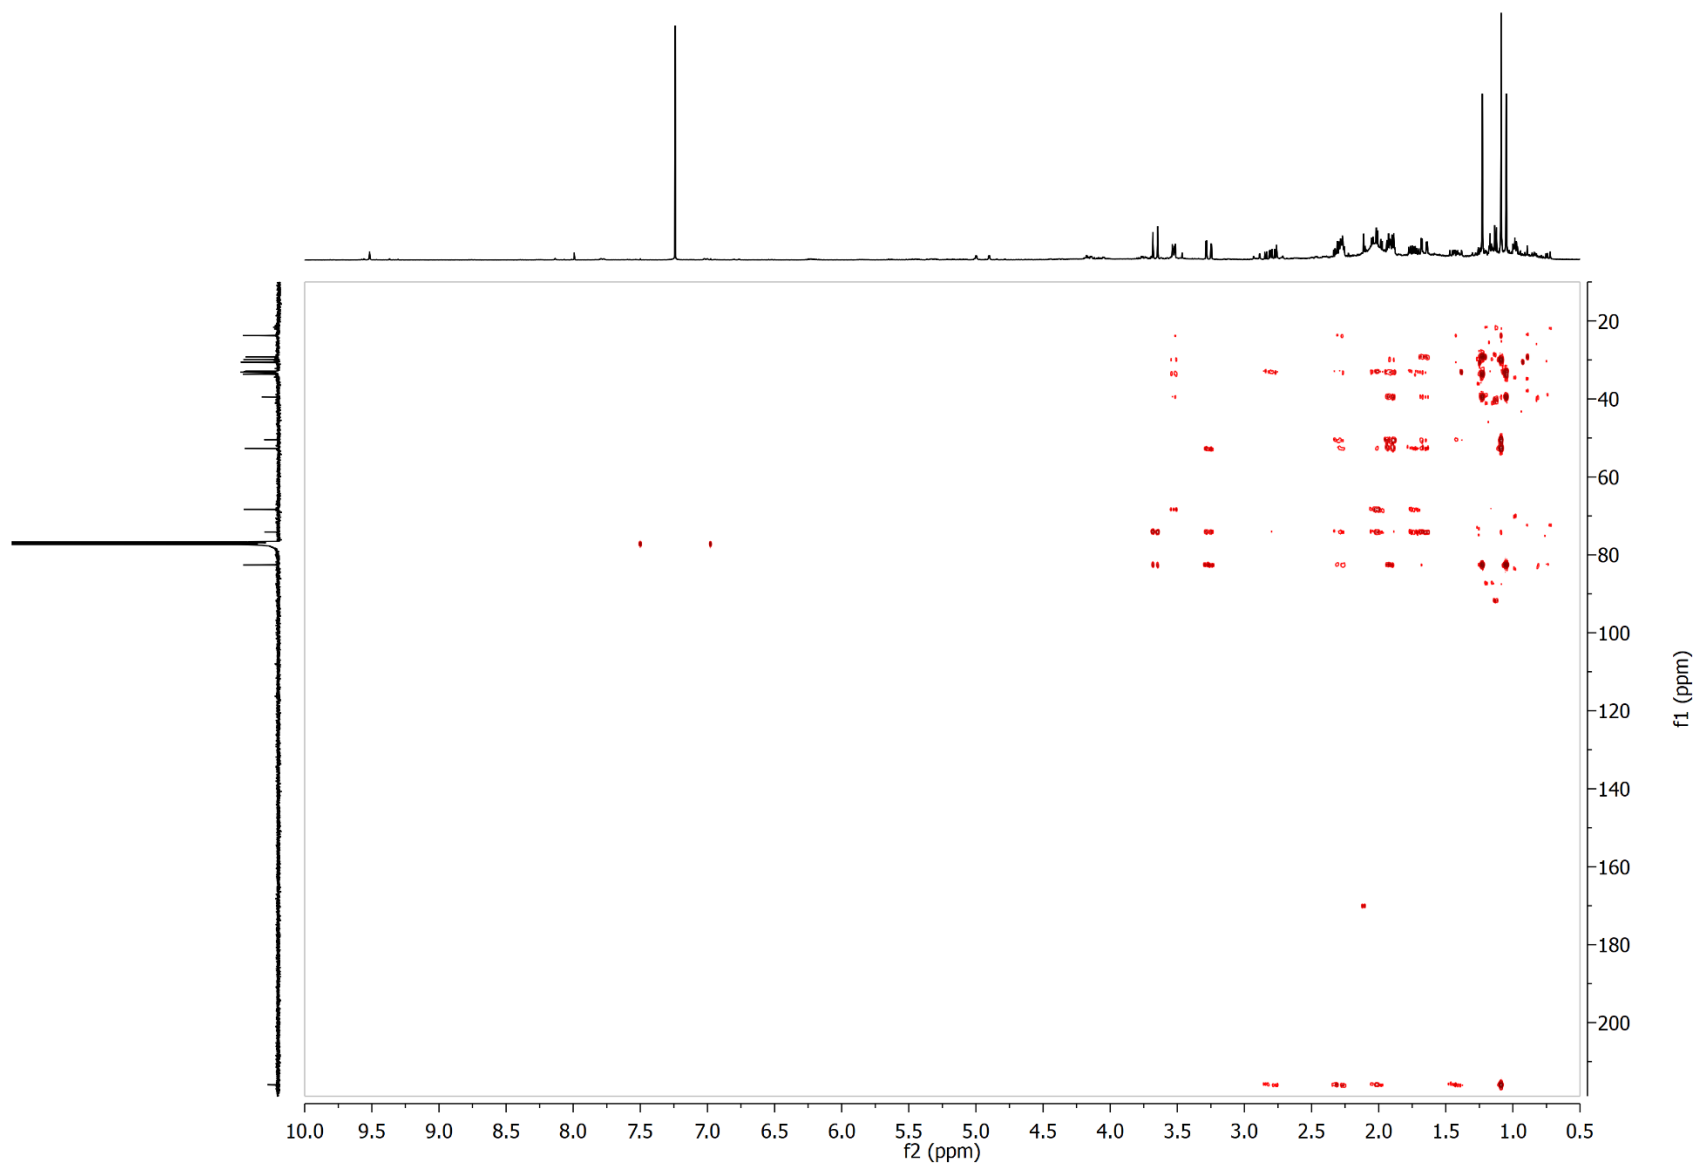

**Figure S94.** HMBC NMR (400 MHz, CDCl<sub>3</sub>) extension spectrum of **6**

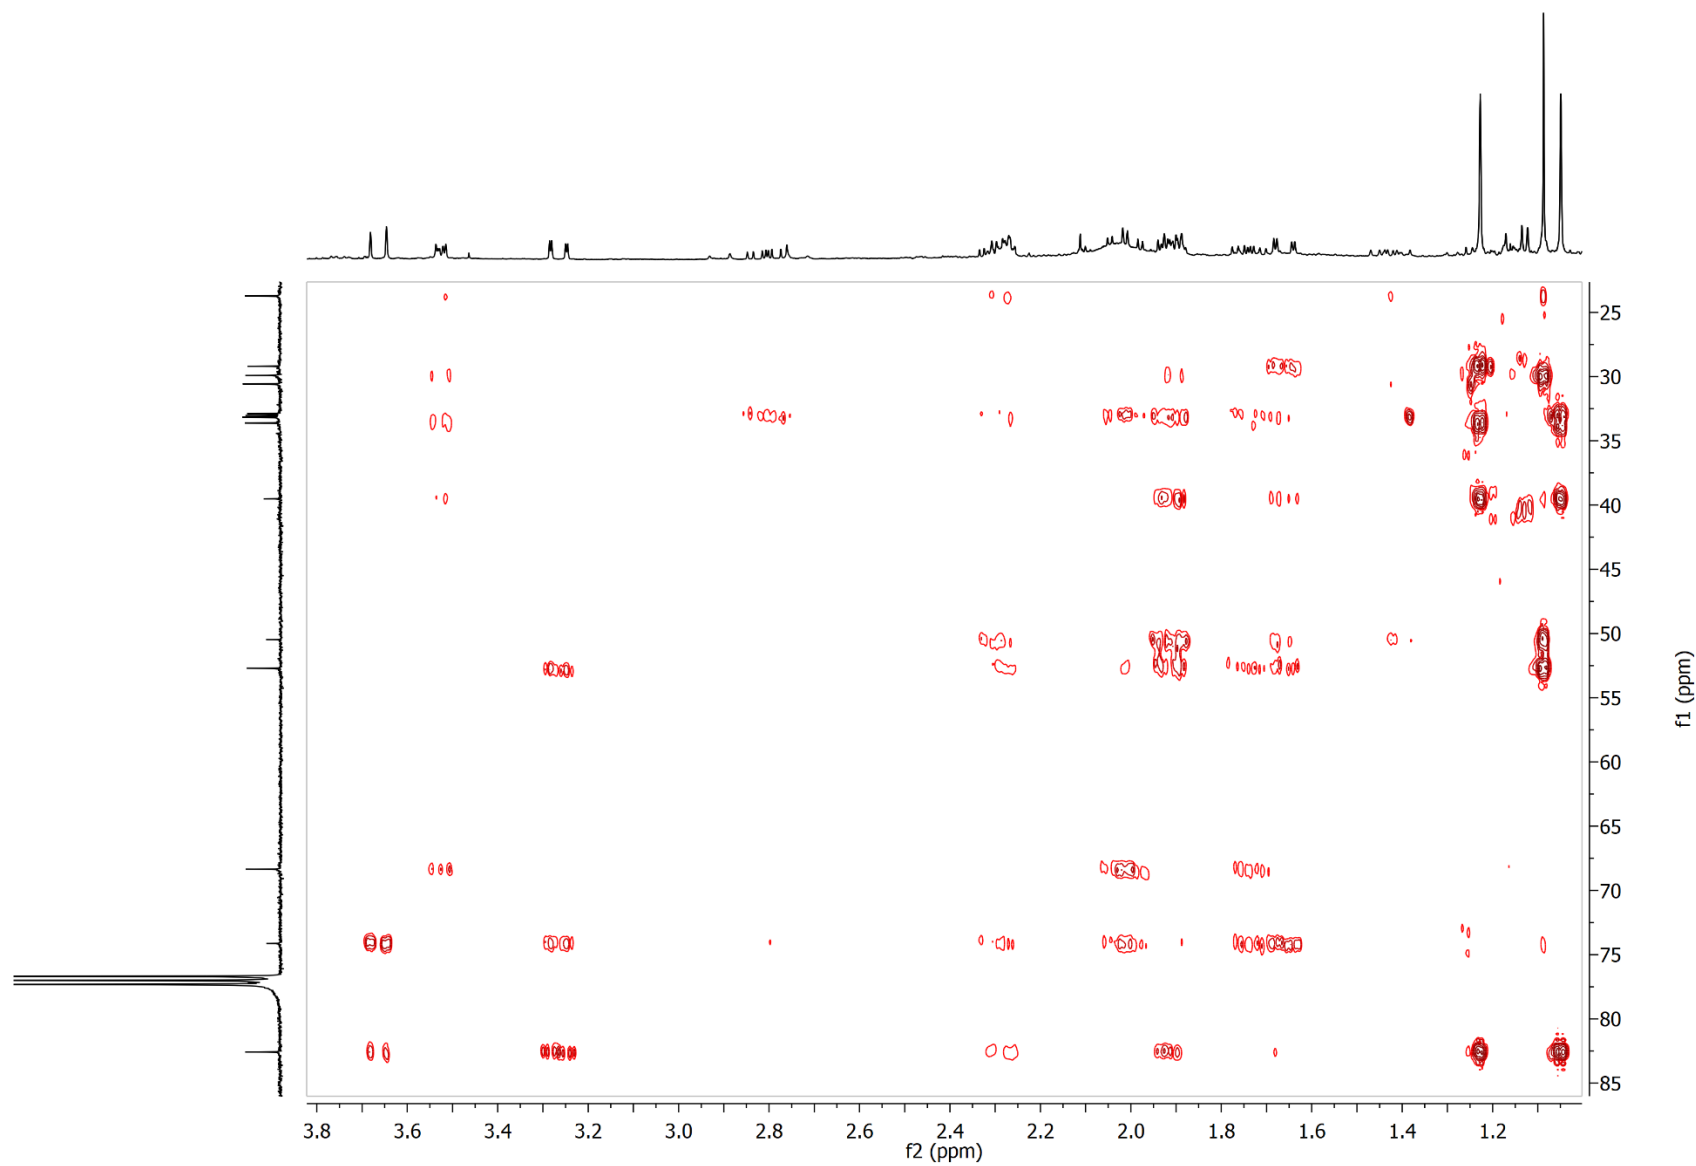

**Figure S95.**  $^1\text{H}$ - $^1\text{H}$  COSY NMR (400 MHz,  $\text{CDCl}_3$ ) spectrum of **6**

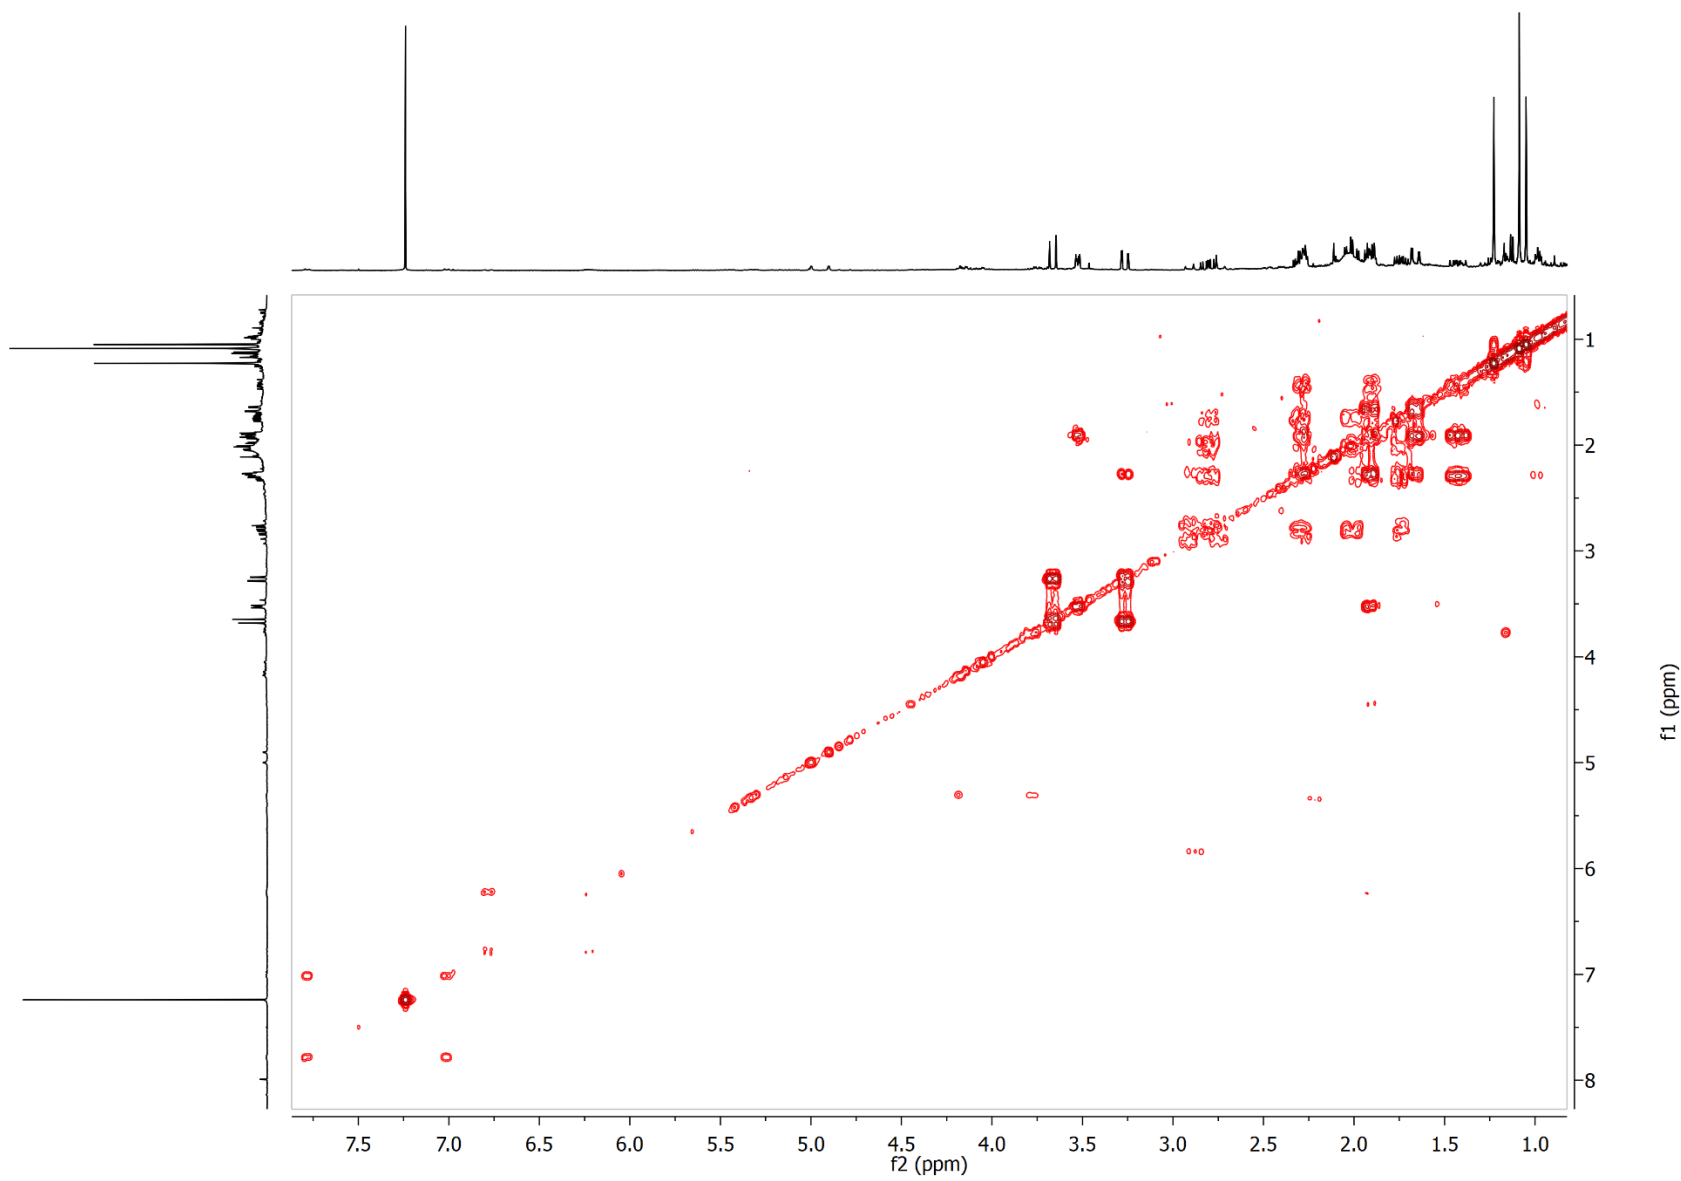

**Figure S96.**  $^1\text{H}$ - $^1\text{H}$  COSY NMR (400 MHz,  $\text{CDCl}_3$ ) extension spectrum of **6**

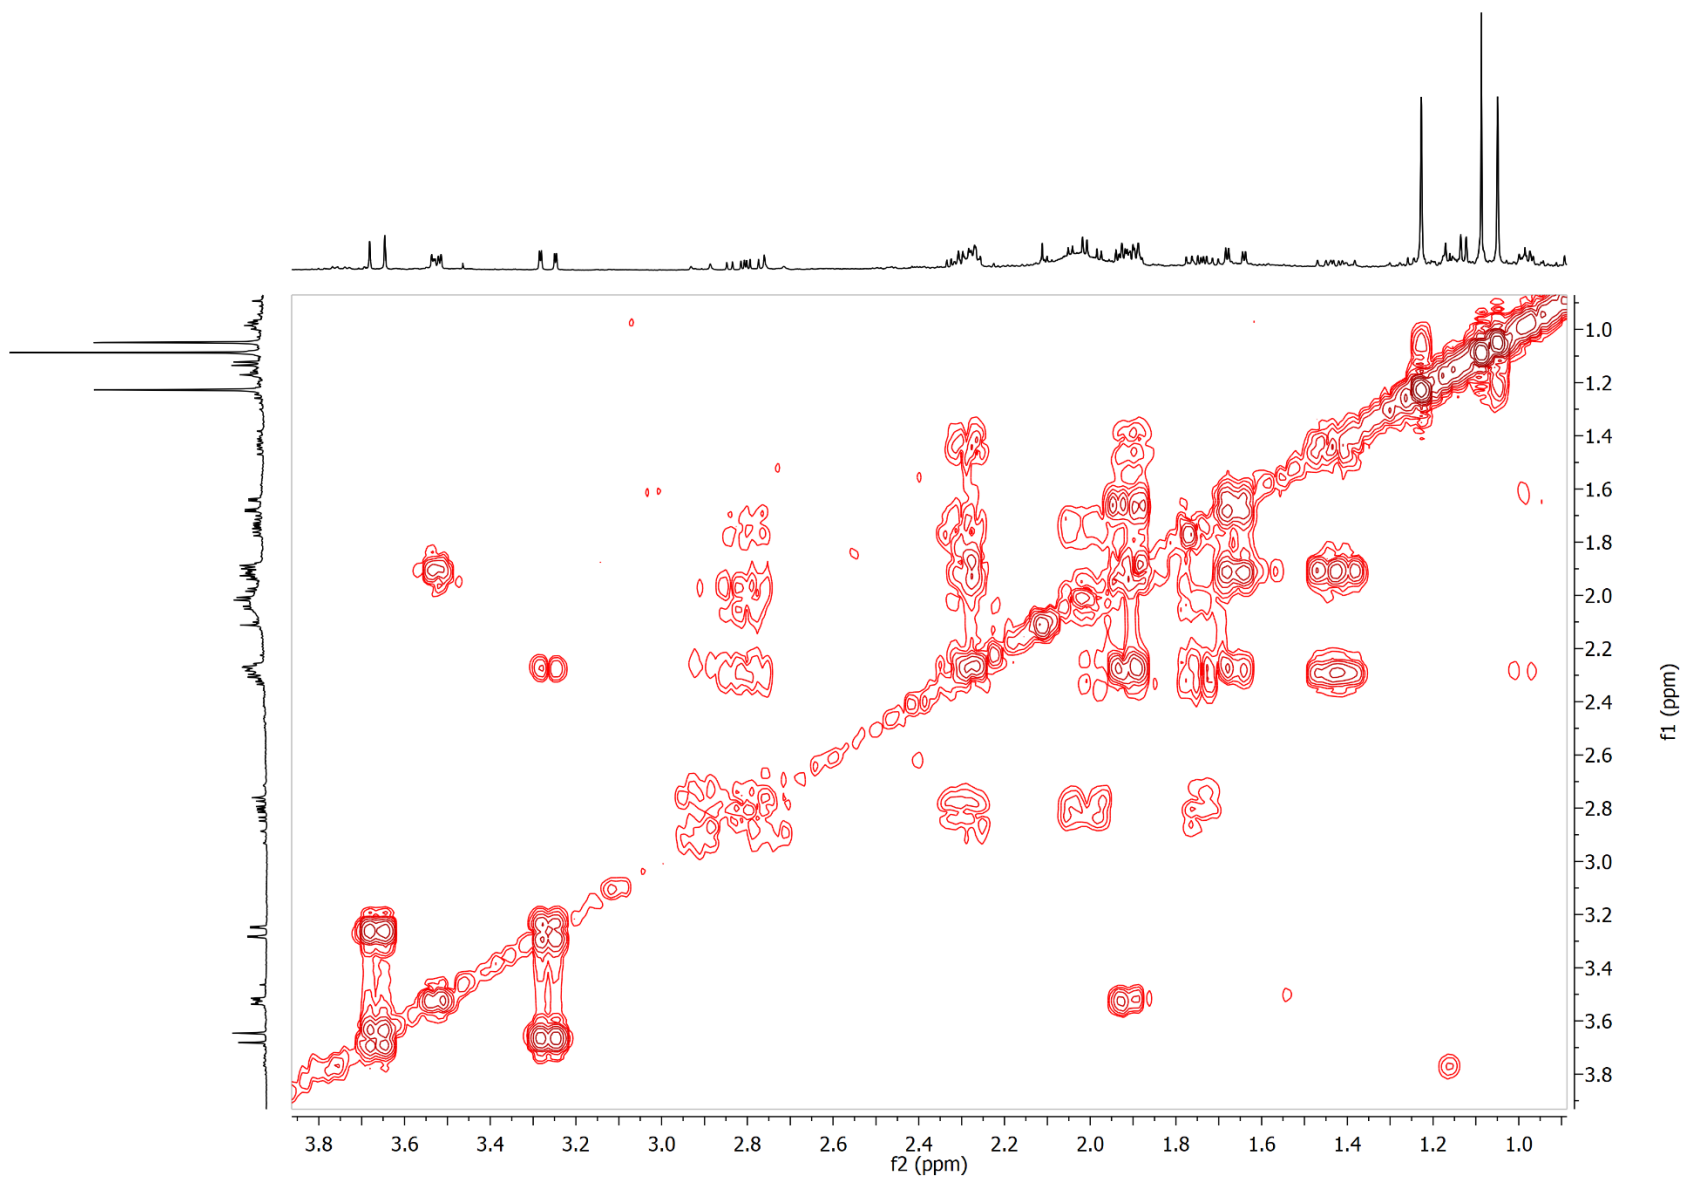



**Figure S97.**  $^1\text{H}$ - $^1\text{H}$  NOESY NMR (400 MHz,  $\text{CDCl}_3$ ) spectrum of **6**

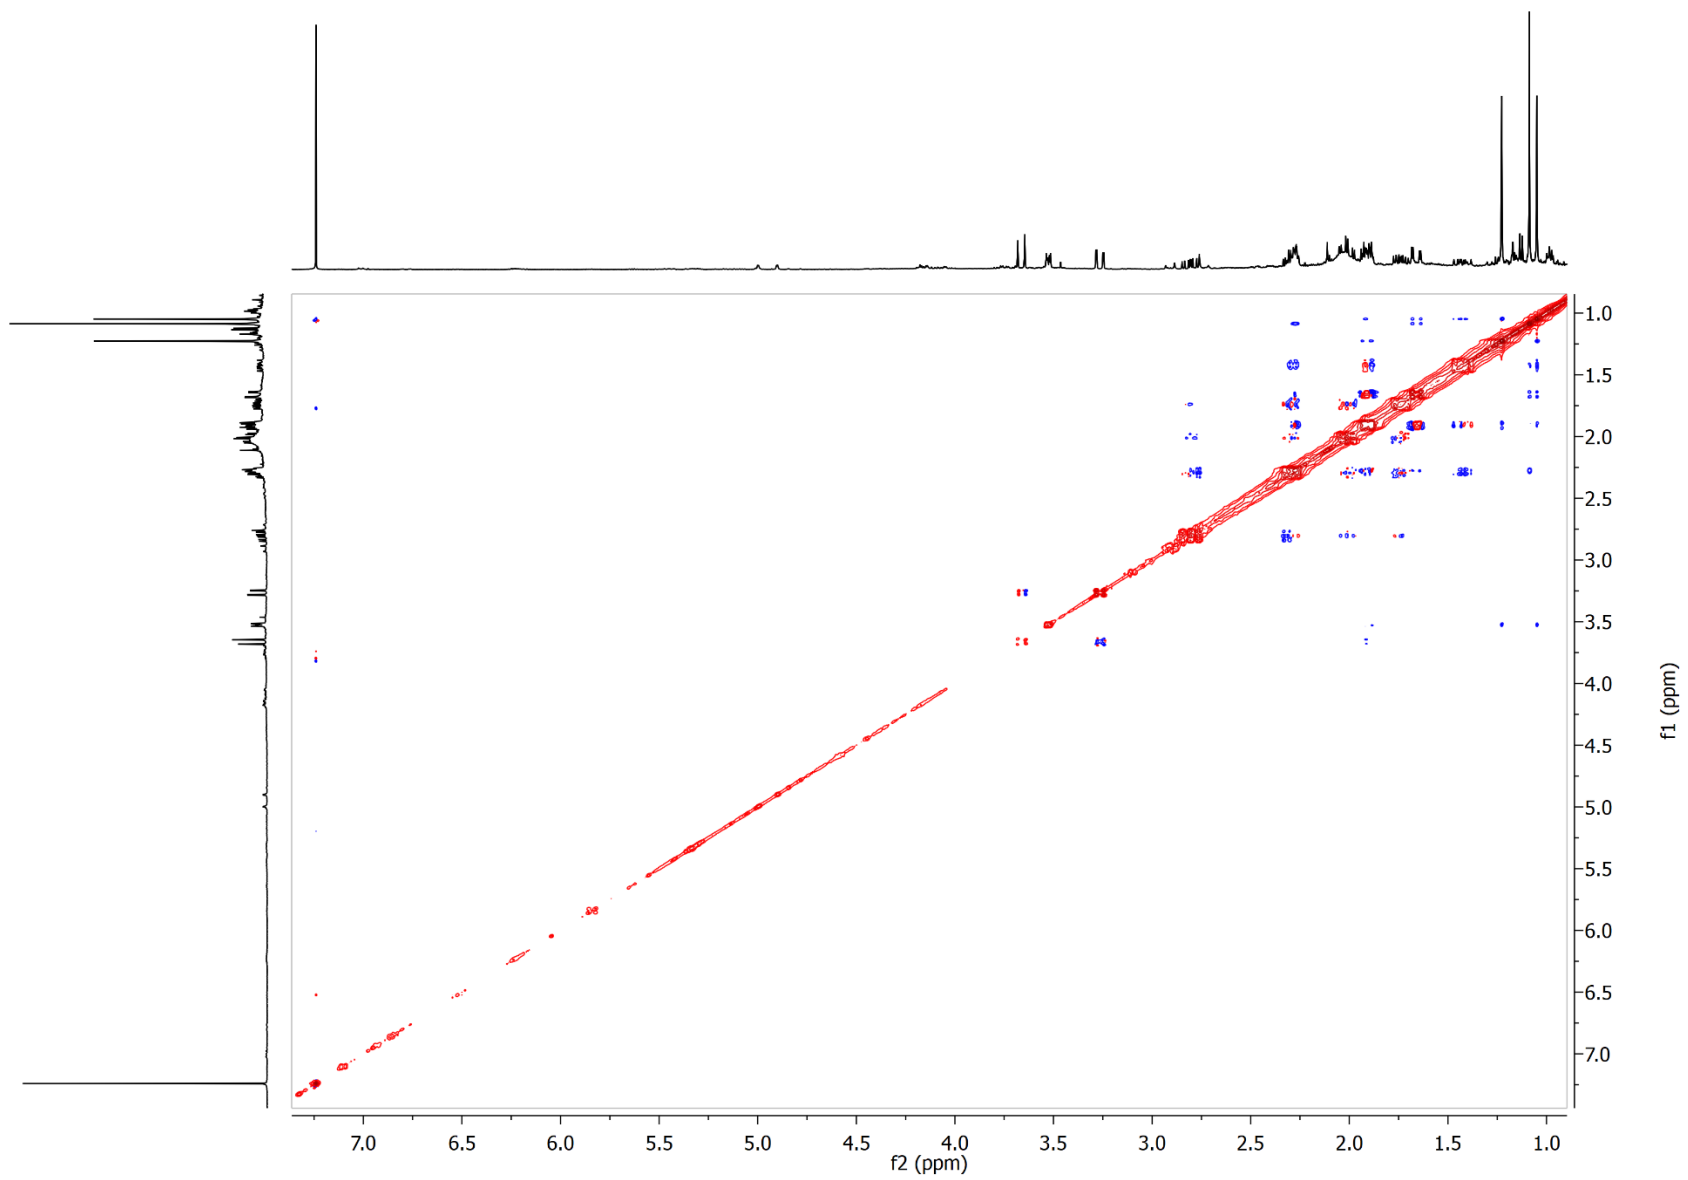

**Figure S98.**  $^1\text{H}$ - $^1\text{H}$  NOESY NMR (400 MHz,  $\text{CDCl}_3$ ) extension spectrum of **6**

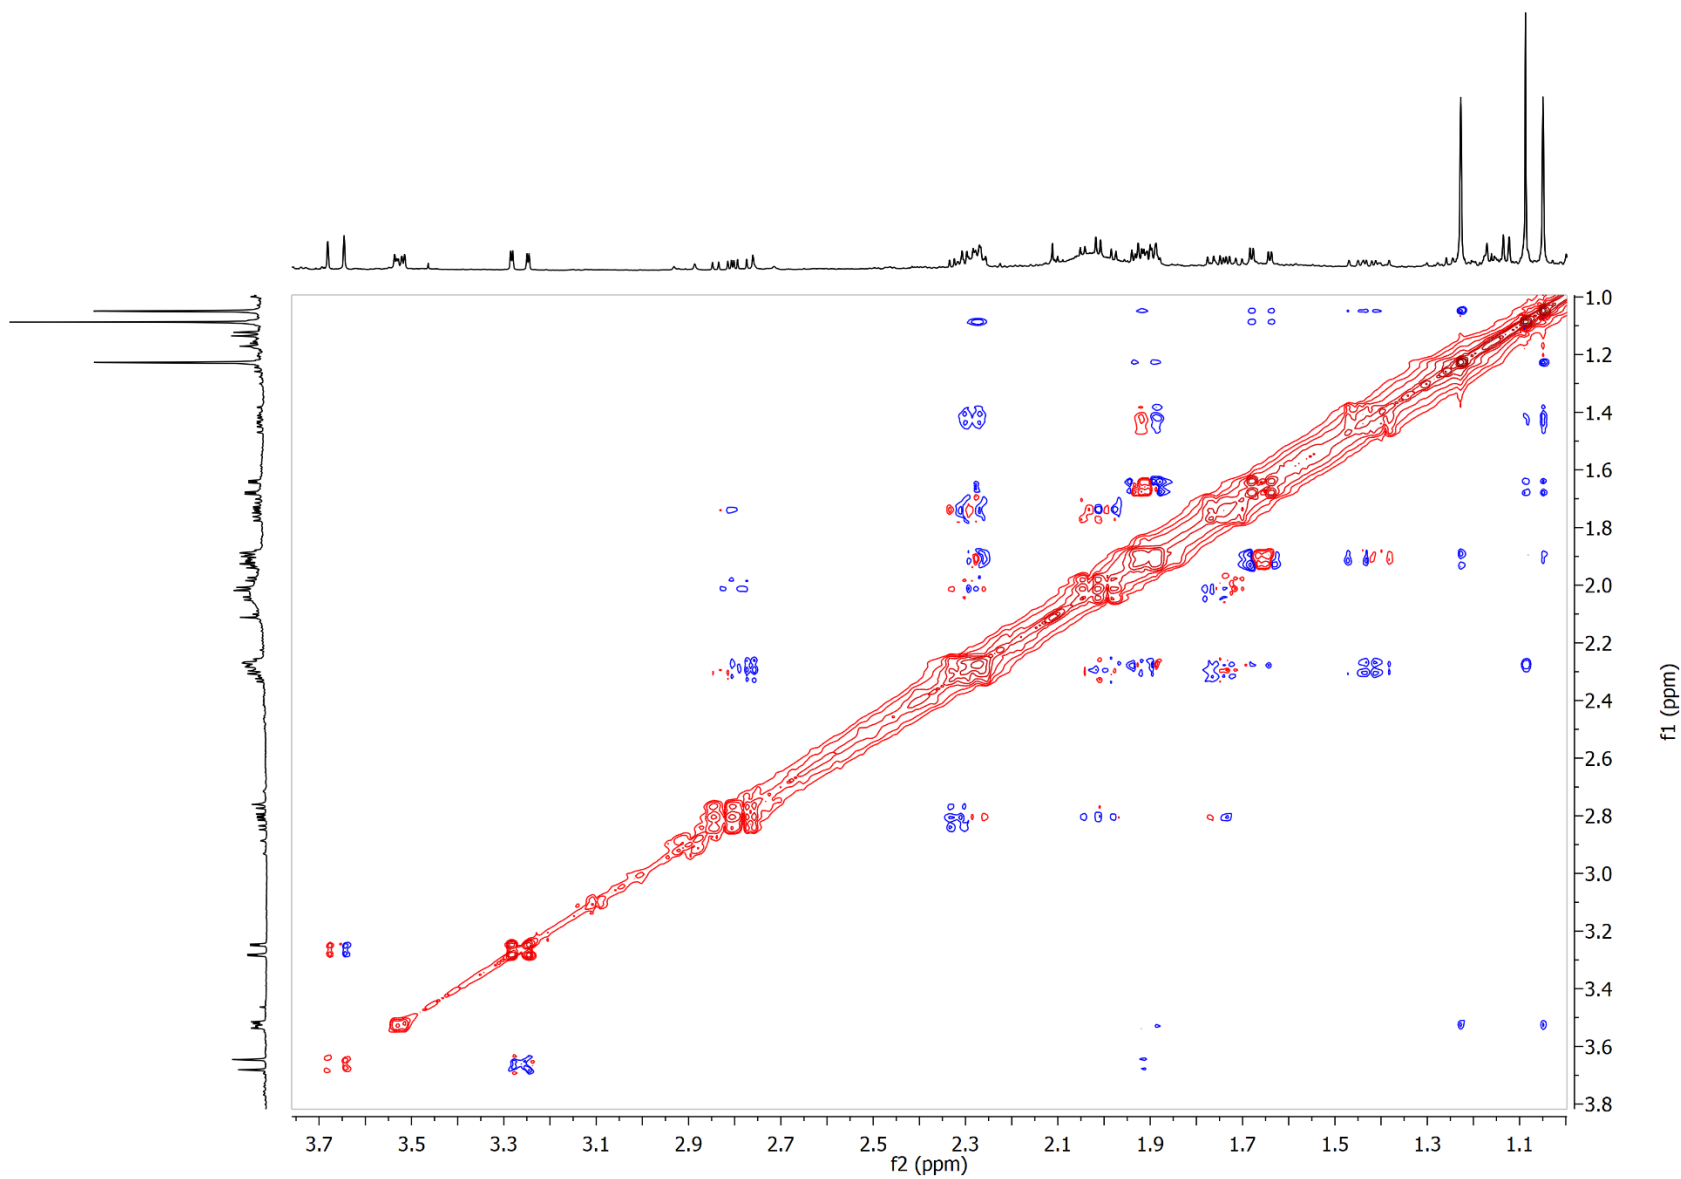

**Figure S99.** ESIMS/MS spectrum of compound **6** ( $[M + H]^+$ , positive ion mode)

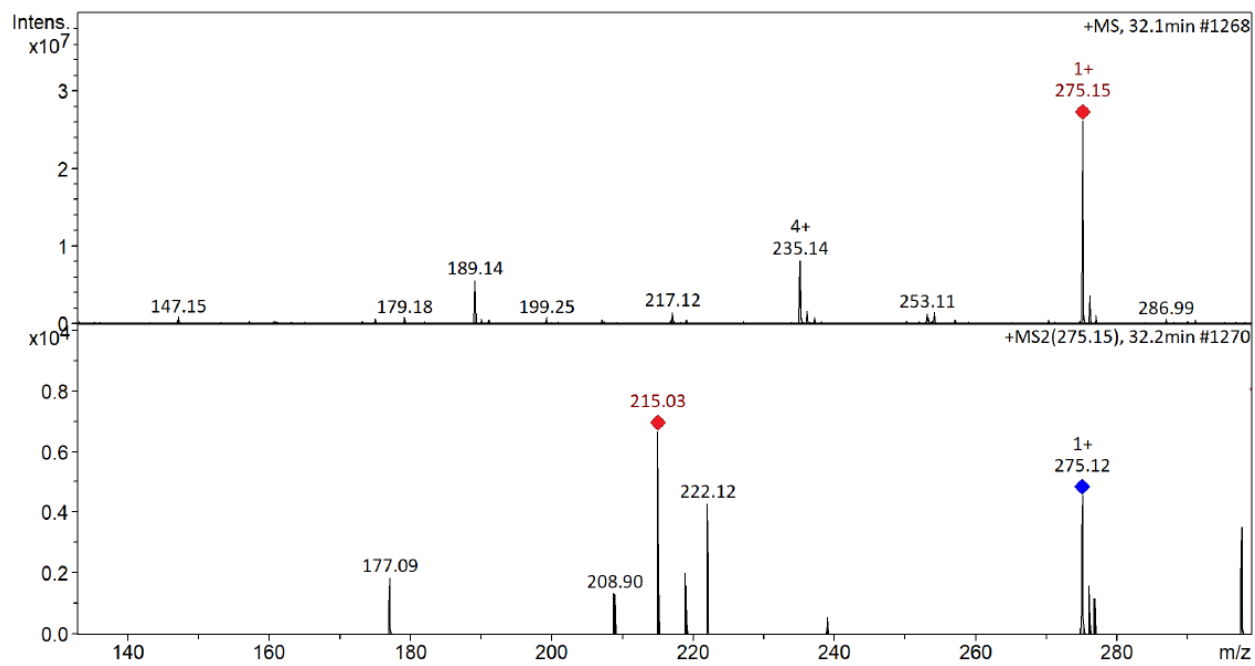

Supplement: ao0c00690_si_001.pdf [file ao0c00690_si_001.pdf]
